# Supplementary material for: MER57E3 transposable element subfamily co-opted for gene regulation in human early neural development
Source: Research Square preprint supplement (doi:10.21203/rs.3.rs-6279618/v1), 2025-04-07
Supplement: Supplementary file 2 [file 20279995e86a90e530d0551c.xlsx]

## Sheet: Suppl. Table 1
Supplementary Table 1. Enrichment levels of TE subfamilies. Log2 fold-change enrichment values for 1,159 TE subfamilies, comparing ChIP-seq signal to input control across the brain dataset. Six brain cell types, including astrocytes, neural progenitor cells (NPCs), neural crest cells (NCs), neurons, dorsal progenitor cells (DPCs), and neural stem cells (NSCs). Four histone modifications, H3K4me3,…
subfamily	family	class	astrocyte_H3K4me3	astrocyte_H3K27ac	astrocyte_H3K9me3	astrocyte_H3K27me3	NPC_H3K4me3	NPC_H3K27ac	NPC_H3K9me3	NPC_H3K27me3	NC_H3K4me3	NC_H3K27ac	NC_H3K9me3	NC_H3K27me3	neuron_H3K4me3	neuron_H3K9me3	neuron_H3K27me3	DPC_H3K4me3	DPC_H3K27ac	DPC_H3K27me3	NSC_H3K27ac	NSC_H3K27me3
Alu	Alu	SINE	-0.171875	0.151927	-0.0160929	-0.107247	-0.295178	0.0201006	-0.139025	-0.245862	-0.405416	-0.184957	-0.0600571	-0.125215	-0.564339	0.286208	-0.299472	-0.200404	-0.0765268	-0.276682	0.280678	0.312396
AluJb	Alu	SINE	-0.272691	0.158402	0.0950557	0.0540915	-0.418914	0.100783	-0.185422	-0.159116	-0.497947	-0.24212	-0.0699792	0.00524542	-1.08087	0.274601	-0.44648	-0.283511	0.0383164	-0.0544293	0.26129	0.272043
AluJo	Alu	SINE	-0.286038	0.141231	0.0234167	0.097892	-0.427752	0.0766273	-0.210915	-0.144509	-0.522446	-0.213249	-0.156716	-0.00474921	-1.00595	0.216267	-0.423043	-0.250402	0.0694718	-0.0193257	0.206059	0.220256
AluJr	Alu	SINE	-0.285767	0.106208	0.0150868	0.0910443	-0.426921	0.0389701	-0.185841	-0.142832	-0.551582	-0.217016	-0.154321	0.00992287	-1.02471	0.198325	-0.419838	-0.264068	0.0193055	-0.0153335	0.198351	0.211632
AluJr4	Alu	SINE	-0.333051	0.116812	-0.0200426	0.0362233	-0.458633	0.0261033	-0.194544	-0.251323	-0.681774	-0.257399	-0.195505	0.000675987	-1.14045	0.220419	-0.461681	-0.314346	-0.0193704	-0.0957391	0.163802	0.183397
AluSc	Alu	SINE	-0.148697	0.212924	0.266014	0.00818868	-0.340233	0.0576074	-0.115072	-0.141656	-0.443782	-0.180182	0.0698136	0.0460145	-0.922423	0.385765	-0.441455	-0.252075	-0.00213269	0.00505435	0.478351	0.48933
AluSc5	Alu	SINE	-0.177108	0.22226	0.247323	0.0068806	-0.361747	0.0791538	-0.13174	-0.122066	-0.485849	-0.169858	0.0471476	0.0502276	-0.983712	0.38314	-0.410823	-0.291159	-0.0165812	-0.00879577	0.44577	0.455357
AluSc8	Alu	SINE	-0.143957	0.236965	0.311261	-0.0208331	-0.345885	0.0798162	-0.0986429	-0.152456	-0.468204	-0.172093	0.0741028	0.0511172	-0.902581	0.387141	-0.461002	-0.240365	-0.00596366	-0.0125093	0.511706	0.522987
AluSg	Alu	SINE	-0.161849	0.265853	0.198483	0.00921907	-0.348024	0.0657039	-0.15769	-0.151371	-0.451611	-0.161657	-0.00589944	0.0450353	-0.888694	0.343714	-0.43786	-0.246007	0.0373696	-0.0150583	0.469276	0.47674
AluSg4	Alu	SINE	-0.166701	0.296317	0.258325	-0.0296321	-0.35893	0.0582212	-0.110811	-0.165621	-0.429998	-0.154175	0.00281641	0.0623146	-0.816825	0.342727	-0.467929	-0.26416	-0.0492755	-0.00692386	0.514412	0.523642
AluSg7	Alu	SINE	-0.177939	0.244736	0.200233	-0.0465084	-0.313055	0.0594966	-0.139252	-0.167204	-0.450222	-0.148562	-0.0122638	0.0323561	-0.801694	0.345204	-0.432004	-0.224737	0.033636	0.00925459	0.484108	0.496727
AluSp	Alu	SINE	-0.112842	0.229497	0.204019	0.00385357	-0.290618	0.069406	-0.109882	-0.139882	-0.472007	-0.167202	-0.0255132	0.0587434	-0.812283	0.383728	-0.441317	-0.251605	9.29183e-05	-0.0111943	0.474783	0.472056
AluSq	Alu	SINE	-0.187292	0.276138	0.146497	0.000472455	-0.359605	0.0817566	-0.168937	-0.153273	-0.498534	-0.201129	-0.0485599	0.0190532	-0.886438	0.314953	-0.406363	-0.256469	0.0497962	-0.0111639	0.461155	0.461302
AluSq10	Alu	SINE	-0.163514	0.304177	0.204159	-0.0250668	-0.310142	0.0761603	-0.127201	0.0538472	-0.419953	-0.194585	-0.0694724	0.0385337	-0.539381	0.293795	-0.422661	-0.102885	0.14966	0.0573198	0.482811	0.507732
AluSq2	Alu	SINE	-0.208535	0.225913	0.158367	0.0118101	-0.364859	0.0470909	-0.163615	-0.153888	-0.536865	-0.172146	-0.0518037	0.0455083	-0.920947	0.324972	-0.399558	-0.259357	0.00482352	-0.00673704	0.448547	0.452146
AluSq4	Alu	SINE	-0.182658	0.26214	0.159932	-0.036882	-0.304445	0.089603	-0.132649	-0.117285	-0.352977	-0.122606	-0.0242227	0.0701556	-0.721349	0.334955	-0.399058	-0.240693	0.00644176	-0.0602143	0.475921	0.478534
AluSx	Alu	SINE	-0.205143	0.221719	0.166161	0.0231199	-0.382516	0.0681587	-0.171455	-0.162703	-0.494672	-0.184443	-0.0285181	0.036441	-0.967325	0.3223	-0.418108	-0.266029	0.0297467	-0.0042633	0.421153	0.424458
AluSx1	Alu	SINE	-0.225811	0.257977	0.162356	0.007128	-0.377849	0.0563915	-0.172394	-0.146477	-0.516727	-0.184219	-0.0435939	0.0360093	-0.937918	0.305639	-0.396191	-0.261411	0.0271744	0.0176032	0.451597	0.448793
AluSx3	Alu	SINE	-0.163696	0.268923	0.193922	-0.0196843	-0.354526	0.0694132	-0.139286	-0.175203	-0.453624	-0.158781	-0.00284134	0.0302561	-0.871054	0.351201	-0.445765	-0.242983	0.0279875	-0.0284683	0.472251	0.475945
AluSx4	Alu	SINE	-0.217414	0.258976	0.219102	-0.0271089	-0.376174	0.0412721	-0.144455	-0.169094	-0.464113	-0.186348	0.00640708	0.0358288	-0.908163	0.358657	-0.463643	-0.269061	0.0177652	0.000121333	0.483604	0.500211
AluSz	Alu	SINE	-0.234335	0.219278	0.150037	0.0381457	-0.403842	0.0523291	-0.175007	-0.174745	-0.543646	-0.210751	-0.0370383	0.0317156	-1.0444	0.312665	-0.417006	-0.285344	0.0130776	-0.0013443	0.39257	0.398306
AluSz6	Alu	SINE	-0.277413	0.222506	0.119595	0.039025	-0.4336	0.0893259	-0.173667	-0.215103	-0.573226	-0.2435	-0.049905	0.0131211	-1.12645	0.29877	-0.434517	-0.304695	0.00587135	-0.0306034	0.354562	0.360324
AluY	Alu	SINE	-0.110188	0.353199	0.39643	-0.072907	-0.315275	0.0437528	-0.0386099	-0.13027	-0.409758	-0.17529	0.173699	0.0263082	-0.802226	0.49047	-0.49778	-0.229732	-0.0249433	-0.0227402	0.71155	0.722284
AluYa5	Alu	SINE	0.0675883	0.659411	0.628592	-0.0833511	-0.188905	-0.0705166	0.103874	-0.133555	-0.297684	-0.103093	0.280673	0.0768693	-0.459549	0.529218	-0.53703	-0.13746	-0.187166	-0.0071985	1.02377	1.03083
AluYa8	Alu	SINE	-0.0205914	0.426879	0.514214	-0.0575649	-0.203125	-0.224757	0.112096	-0.157539	-0.390392	-0.359172	0.230752	-0.128752	-0.460626	0.421648	-0.562291	-0.129124	-0.671332	-0.360827	0.558552	0.626227
AluYb8	Alu	SINE	0.00105054	0.489328	0.627404	-0.133458	-0.315342	-0.0425701	0.0160856	-0.139197	-0.299722	-0.100841	0.365451	0.0544079	-0.576003	0.597272	-0.535987	-0.179797	-0.168488	0.0636873	1.02245	1.00777
AluYb9	Alu	SINE	0.0763151	0.47879	0.638524	-0.133821	-0.321768	-0.0323563	0.0649294	-0.157403	-0.345277	-0.0991926	0.373137	0.0767138	-0.540288	0.626601	-0.550926	-0.164664	-0.305655	0.117233	1.04224	1.00931
AluYc	Alu	SINE	-0.0338578	0.385127	0.351051	-0.0842133	-0.305952	0.0666452	-0.0506902	-0.148483	-0.272967	-0.152575	0.213139	0.054157	-0.636115	0.507146	-0.469663	-0.196299	-0.00662364	0.00168589	0.709507	0.738926
AluYc3	Alu	SINE	0.0728745	0.471708	0.428997	-0.168329	-0.176377	0.050889	-0.0250851	-0.0563486	-0.298068	-0.224981	0.141692	-0.041771	-0.448674	0.523694	-0.516311	-0.0493454	-0.0128431	0.0463345	0.808366	0.776251
AluYd8	Alu	SINE	0.0380861	0.508323	0.608008	0.0230942	-0.237957	0.0399418	0.116041	-0.149882	-0.217962	-0.290633	0.354915	-0.034439	-0.507551	0.602066	-0.513475	-0.245825	0.0290345	0.0838372	1.06402	1.07141
AluYe5	Alu	SINE	0.0570657	0.440147	0.477675	-0.0821906	-0.169217	0.00455043	-0.00657137	-0.119447	-0.215389	-0.101417	0.20463	0.0551961	-0.438849	0.555185	-0.443964	-0.122789	-0.0295519	-0.013736	0.897205	0.922237
AluYe6	Alu	SINE	0.169435	0.579692	0.585263	-0.0204763	-0.194762	0.122308	0.0446509	-0.0065245	-0.282182	-0.257669	0.186807	0.0417709	-0.510901	0.469114	-0.500178	-0.220126	0.0347045	-0.0156523	0.851693	0.858943
AluYf1	Alu	SINE	-0.0655108	0.386069	0.392722	-0.0343669	-0.280222	0.056103	-0.0585989	-0.10264	-0.345778	-0.123191	0.221047	0.0441161	-0.771861	0.466543	-0.493135	-0.210416	-0.0554301	-0.0276379	0.677694	0.693447
AluYg6	Alu	SINE	0.182071	0.533153	0.598916	0.0108223	-0.24218	-0.0451144	0.0206715	-0.0477712	-0.208081	-0.0894996	0.251306	0.00825123	-0.421652	0.635595	-0.524053	-0.0352138	-0.0817907	0.0612231	0.739439	0.781203
AluYh3	Alu	SINE	-0.141539	0.361433	0.361813	-0.0568445	-0.350519	0.032174	-0.0197012	-0.120112	-0.374698	-0.148657	0.208232	0.0691474	-0.834278	0.528559	-0.495679	-0.232494	-0.0220795	-0.0276961	0.705268	0.708485
AluYh3a3	Alu	SINE	-0.236369	0.489357	0.283851	-0.0890361	-0.395945	0.0387408	-0.0846943	-0.182287	-0.544418	-0.138159	0.0320234	0.00747501	-1.07898	0.380074	-0.373143	-0.177506	0.123547	-0.0337748	0.579963	0.572528
AluYh7	Alu	SINE	-0.00172988	0.270592	0.333645	-0.179446	0.0615713	0.210392	0.109534	-0.116323	0.501227	0.0313211	0.53607	0.0895344	0.51687	0.623237	-0.53793	0.207684	0.0767784	-0.106368	0.340701	0.426129
AluYh9	Alu	SINE	0.246397	-0.208496	0.198864	0.0200949	0.332232	-0.182086	0.411653	-0.248159	0.239822	-0.338298	0.351007	-0.246251	0.376006	0.322188	-0.552543	-0.14427	-0.518184	-0.705485	-0.0822418	-0.252361
AluYi6	Alu	SINE	-0.0730607	0.290161	0.360241	-0.236967	-0.291452	-0.0498465	-0.0237118	-0.145899	-0.286683	-0.19831	0.284923	0.109366	-0.606602	0.472223	-0.457268	-0.270901	-0.128087	0.0386098	0.827406	0.829331
AluYi6_4d	Alu	SINE	-0.110532	0.300153	0.459861	0.0632748	-0.411807	-0.00406193	-0.0872215	-0.172554	-0.551996	-0.140123	0.142792	-0.0232806	-0.737208	0.506918	-0.506639	-0.23126	-0.0984874	-0.150973	0.72766	0.676322
AluYj4	Alu	SINE	-0.141757	0.203478	0.345622	-0.106315	-0.289607	-0.0399431	0.0590081	-0.195723	-0.390321	-0.221337	0.246435	-0.0132653	-0.922311	0.447409	-0.52922	-0.300007	-0.161993	-0.112704	0.527344	0.545348
AluYk11	Alu	SINE	-0.260527	0.234883	0.304226	-0.00191695	-0.354365	0.000526292	-0.0331719	-0.296952	-0.397304	-0.132644	0.114485	0.0335039	-0.802266	0.399663	-0.454682	-0.429146	-0.0188059	-0.027855	0.465627	0.526067
AluYk12	Alu	SINE	0.0451166	0.44991	0.409216	-0.0707632	-0.255421	-0.0396493	0.177466	-0.0680484	-0.474277	-0.118854	0.0831346	-0.0677874	-0.717185	0.488018	-0.505313	-0.307737	-0.309673	-0.0770299	0.602482	0.626436
AluYk2	Alu	SINE	-0.0367897	0.431493	0.37219	-0.0666544	-0.267339	0.118915	-0.0439942	-0.131922	-0.27556	-0.103159	0.275479	0.127047	-0.651267	0.499121	-0.524038	-0.182847	-0.0432807	-0.0592379	0.677282	0.753711
AluYk3	Alu	SINE	-0.0635181	0.38197	0.425	-0.0804751	-0.30871	0.00948405	-0.000284114	-0.17093	-0.384992	-0.198334	0.214226	0.0340536	-0.779491	0.489588	-0.496637	-0.270016	-0.118414	-0.0441806	0.744476	0.772164
AluYk4	Alu	SINE	-0.0700033	0.364496	0.468214	-0.0368971	-0.306622	0.0155959	-0.0490415	-0.149452	-0.355415	-0.151535	0.235767	0.0335804	-0.76155	0.491536	-0.513274	-0.175253	-0.101278	-0.0702001	0.789379	0.79968
AluYm1	Alu	SINE	-0.172821	0.298497	0.503183	-0.164348	-0.296521	0.0551531	-0.00461811	-0.141893	-0.437323	-0.173677	0.181375	0.041565	-0.782157	0.473479	-0.498421	-0.232065	-0.0581837	-0.0446941	0.685875	0.704266
AmnSINE1	5S-Deu-L2	SINE	0.123836	0.952083	-0.342867	-0.0637157	-0.0517316	0.310811	-0.321109	-0.259801	0.164888	0.451205	-0.396449	-0.0446495	-0.232155	-0.525111	-0.204247	0.0396068	0.279712	0.0378568	-0.0908291	-0.135028
AmnSINE2	tRNA-Deu	SINE	0.00780759	0.606615	-0.427119	0.159934	-0.241571	0.452457	-0.307687	-0.0677809	-0.0903435	0.318222	-0.271141	0.0429288	-0.471539	-0.468634	-0.0108969	-0.119062	0.340209	0.312105	-0.122013	-0.228756
Arthur1	hAT-Tip100	DNA	-0.716529	-0.492988	-0.474637	-0.115955	-0.442448	-0.399857	-0.00828224	-0.31412	-1.11589	-0.338736	-0.559438	-0.0167279	-0.579999	-0.367427	0.284578	-0.172881	-0.430442	-0.0635045	-0.163594	-0.0846047
Arthur1A	hAT-Tip100	DNA	-0.336571	0.39807	-0.254825	0.387672	-0.292805	0.11344	-0.303356	0.0632247	-0.369482	-0.0883444	-0.405583	-0.0975801	-0.541493	-0.367285	0.440571	-0.235955	0.17278	-0.0112733	0.0655479	0.12035
Arthur1B	hAT-Tip100	DNA	-0.453282	-0.317402	-0.237942	0.048086	-0.390592	-0.162765	-0.118513	-0.289207	-0.709521	-0.289619	-0.330503	-0.0315562	-0.811463	-0.346061	0.219682	-0.153268	-0.254728	0.067315	-0.0205104	0.0257095
Arthur1C	hAT-Tip100	DNA	0.0111626	0.531262	-0.393856	0.117719	-0.283694	0.0486163	-0.28722	-0.096913	-0.274394	0.5274	-0.407253	-0.0481519	0.0348188	-0.198038	0.526589	-0.0109527	0.0459273	0.136528	0.0262117	0.0131945
BLACKJACK	hAT-Blackjack	DNA	-0.808037	-0.627105	-0.436051	-0.398205	-0.466443	-0.397137	0.0610326	-0.538069	-1.06462	-0.294222	-0.559528	0.0481886	-0.921587	-0.395493	0.057022	-0.171247	-0.422968	-0.10974	-0.240238	-0.128569
CR1-11_Crp	CR1	LINE	-2.04079	0.0345455	-0.248149	-0.903942	-0.414194	0.708607	0.215645	-0.0249959	-0.870266	0.340153	-0.864405	0.110487	-1.15959	0.367994	-0.775388	-0.246593	0.391111	-0.427194	0.375062	0.371116
CR1-12_AMi	CR1	LINE	-0.446604	0.195785	-0.563926	0.325474	-0.733958	-0.113425	-0.195626	0.0495804	-0.562136	-0.377815	-0.78731	0.0942389	-1.11386	-0.709879	0.0900098	0.237035	0.403076	0.185825	-0.280208	-0.125977
CR1-13_AMi	CR1	LINE	-0.418518	-0.212244	-0.256475	0.282902	-0.348154	0.142897	-0.222902	-0.445238	-0.485532	-0.0963228	-0.215614	0.191808	-1.1537	-0.0507319	-0.287518	-0.302284	0.426515	0.775958	-0.0500454	-0.38079
CR1-16_AMi	CR1	LINE	-0.306274	0.0933921	-0.281972	0.305747	-0.114942	0.113676	0.0691568	-0.177275	-0.164791	0.496545	-0.527621	0.115053	-1.15817	-0.516509	0.312553	-0.00167712	0.15473	0.240334	-0.0479815	-0.227139
CR1-3_Croc	CR1	LINE	-0.373542	0.280063	-0.228123	0.353718	-0.382135	-0.00222896	-0.285119	0.156494	-0.195107	0.0353798	-0.34535	0.0143639	-1.23167	-0.335997	0.117449	-0.0566465	0.340249	0.0331281	-0.203917	-0.107144
CR1-8_Crp	CR1	LINE	-1.82248	NA	-0.70279	-0.131388	-0.383641	0.17821	-0.0133539	-0.731741	-1.78184	-1.24774	-1.12573	-1.22197	0.546282	1.09475	0.544055	-0.104482	0.0775063	NA	-0.412531	-0.67766
CR1-L3A_Croc	CR1	LINE	-0.50211	0.164824	-0.41039	0.145702	-0.243	0.195143	-0.181687	-0.173377	-0.412955	-0.318339	-0.380001	0.00463502	-1.30339	-0.427334	0.0759916	-0.0939678	-0.0660466	-8.52188e-05	-0.323508	-0.214219
CR1-L3B_Croc	CR1	LINE	-1.124	-0.233792	-0.575891	0.600245	0.198495	0.0727595	0.138796	0.650531	0.374554	0.711089	0.220089	0.875644	-0.0374148	-0.627646	1.06158	0.406771	0.918633	1.02599	0.587249	0.569779
CR1_Mam	CR1	LINE	-0.389275	0.175201	-0.550572	0.0409269	-0.235271	0.0656007	-0.165192	-0.341059	-0.383303	-0.0714317	-0.590331	-0.186856	-0.795972	-0.298321	-0.00189916	-0.0139306	0.220843	-0.118797	-0.108189	-0.102248
CRP1	tRNA	SINE	NA	NA	-0.0972972	0.765666	-9.65145	1.09877	-0.913143	2.0898	-2.34215	-1.7866	0.0981804	-1.39559	0.931373	1.49326	1.5071	NA	0.485571	0.852443	0.0103419	1.47788
Chap1_Mam	hAT-Charlie	DNA	-0.347754	0.365228	-0.250399	0.0734507	-0.3289	0.0318808	-0.187263	-0.157428	-0.436895	0.0114125	-0.386611	-0.0913362	-1.00393	-0.246896	0.0596036	-0.296787	-0.0331128	-0.0654875	-0.0395183	0.0107953
Charlie1	hAT-Charlie	DNA	-0.540472	-0.297273	-0.484184	-0.257237	-0.372027	-0.156808	-0.0626323	-0.240424	-0.719447	-0.023199	-0.499533	0.0724842	-0.451507	-0.106729	-0.0168907	-0.141583	-0.185882	-0.180982	-0.0844508	0.0372386
Charlie10	hAT-Charlie	DNA	-0.793675	-0.455781	-0.481155	-0.155459	-0.413412	-0.272907	-0.0731015	-0.390402	-0.94153	-0.310133	-0.52972	-0.0046124	-1.20199	-0.433667	-0.0701836	-0.180839	-0.261494	-0.0235965	-0.222791	-0.176383
Charlie10a	hAT-Charlie	DNA	-0.432864	-0.449826	-0.524237	-0.208119	-0.409922	0.259626	-0.314508	-0.701008	-0.360828	0.163595	-0.179898	0.0185025	-1.49724	-0.261107	-0.522168	0.0123683	0.402343	-0.11198	-0.173029	-0.000819055
Charlie10b	hAT-Charlie	DNA	-0.353141	-0.425747	-0.295356	0.0137103	-0.22177	0.21949	-0.0476619	-0.357479	-0.455408	-0.109313	-0.222815	-0.0358187	-1.03922	-0.383745	-0.391288	-0.456838	0.38265	0.0723043	-0.134342	0.0347346
Charlie11	hAT-Charlie	DNA	-0.631394	0.684231	-0.584184	-0.345581	-0.411714	-0.238731	-0.14281	-0.665252	-0.476234	-0.338725	-0.46502	-0.087342	-1.20742	-0.0392454	-0.0614709	-0.244331	0.240321	-0.707158	-0.121908	0.0196296
Charlie12	hAT-Charlie	DNA	0.917623	-0.648391	-0.706507	-0.55368	0.817563	0.250287	-0.0817809	-0.16732	0.0969959	-0.574226	-0.592981	-0.479628	1.82577	0.101577	-1.01961	0.269879	-0.035871	0.163787	0.00468569	0.495956
Charlie13a	hAT-Charlie	DNA	-0.191542	0.620524	-0.573231	-0.151654	-0.415743	-0.0406766	-0.215515	-0.317676	-0.521272	-0.272464	-0.491628	-0.142093	-0.392406	-0.179522	0.061238	-0.0203252	0.121427	-0.180156	-0.00388945	0.0632699
Charlie13b	hAT-Charlie	DNA	-0.392327	0.2992	-0.480659	-0.21919	-0.369994	-0.0383566	-0.258791	-0.441631	-0.492067	-0.176588	-0.26072	0.120538	-1.19655	-0.157856	-0.0656018	-0.00123873	-0.121799	-0.0429754	-0.0305457	-0.0311515
Charlie14a	hAT-Charlie	DNA	-0.679699	-0.338622	-0.610398	-0.154356	-0.523813	-0.325161	-0.0426107	-0.427121	-0.834342	-0.421316	-0.590727	0.0347128	-0.895277	-0.171095	-0.123594	-0.275227	-0.155086	-0.232025	-0.156577	-0.155547
Charlie15a	hAT-Charlie	DNA	-0.344255	0.304454	-0.297782	0.359936	-0.322043	0.283532	-0.211201	-0.18904	-0.663013	-0.151537	-0.337456	-0.0798243	-1.059	-0.202037	0.259737	-0.251141	0.258838	-0.0236189	0.17494	0.11104
Charlie15b	hAT-Charlie	DNA	-0.227546	0.070828	-0.745354	-0.207321	-0.27733	-0.114113	-0.11922	-0.42134	-0.519652	-0.11099	-0.716332	-0.0445642	0.0811028	-0.321612	0.0163858	-0.0289294	-0.0514985	-0.214004	-0.00205549	0.0308025
Charlie16a	hAT-Charlie	DNA	-0.24657	0.357272	-0.447038	0.256573	-0.2976	-0.00230768	-0.156004	-0.177418	-0.629193	-0.231897	-0.55015	-0.0742706	-0.418993	-0.362752	0.21343	-0.258657	-0.0508749	-0.0819724	0.0747756	0.119014
Charlie17	hAT-Charlie	DNA	-0.594177	-0.321251	-0.627629	-0.199996	-0.517587	-0.160403	-0.120402	-0.645995	-0.8736	0.140723	-0.723701	0.00183493	-0.697337	-0.299492	-0.30276	-0.148955	-0.288129	-0.18813	-0.198309	-0.207165
Charlie17a	hAT-Charlie	DNA	-0.314356	0.0643359	0.00218416	0.0898034	-0.421847	0.091931	-0.289867	-0.285473	-0.260815	-0.148469	0.0224199	-0.0648042	-1.35924	-0.0990267	-0.304241	-0.439481	0.0339091	-0.0107565	-0.0525257	0.0353023
Charlie17b	hAT-Charlie	DNA	-0.58396	-0.711947	-0.338849	-0.0664453	-0.42999	-0.309403	-0.0891121	-0.142185	-0.715581	-0.323418	-0.279435	0.000541374	-0.843685	-0.347106	0.0415987	-0.218254	-0.407127	0.144965	-0.120831	-0.05779
Charlie18a	hAT-Charlie	DNA	-0.360636	0.167097	-0.703545	0.0375624	-0.304466	-0.0504499	-0.123521	-0.224373	-0.728565	-0.27783	-0.625807	-0.0970499	-0.426712	-0.351578	0.491058	-0.0737457	0.0980652	-0.131744	0.149398	0.182311
Charlie19a	hAT-Charlie	DNA	-0.300564	0.122015	-0.526181	0.109706	-0.300281	-0.0133462	-0.163698	-0.166922	-0.525235	-0.0503637	-0.58775	-0.13668	-0.488477	-0.500911	0.167535	0.0193889	0.117962	0.00502577	-0.0496844	0.0552781
Charlie1a	hAT-Charlie	DNA	-0.577724	-0.185754	-0.500602	-0.380828	-0.379265	-0.0972339	-0.0465189	-0.498336	-0.807788	-0.192989	-0.485731	-0.0314075	-0.647353	-0.0746707	-0.211282	-0.116462	-0.128547	-0.27493	0.0353255	0.0937224
Charlie1b	hAT-Charlie	DNA	-0.514691	-0.0778924	-0.494197	-0.166842	-0.536665	-0.136856	-0.0293704	-0.438264	-0.861032	0.0271388	-0.669724	0.0449248	-0.349337	-0.291724	-0.00993528	-0.0835262	-0.168362	-0.235372	0.0486042	0.128745
Charlie20a	hAT-Charlie	DNA	-0.544167	0.168764	-0.443085	-0.103774	-0.314892	0.0194745	-0.185285	-0.366014	-0.634185	-0.068567	-0.337862	-0.037026	-1.27024	-0.345609	0.0396338	-0.287661	0.0790861	-0.0752574	-0.0386352	-0.0937669
Charlie21a	hAT-Charlie	DNA	-0.717586	-0.0355584	-0.592529	-0.443223	-0.52118	-0.197974	-0.0143954	-0.561424	-0.963648	-0.219222	-0.752463	0.110354	-0.312958	-0.457172	-0.0153674	-0.0331779	-0.0503683	-0.346421	-0.0168836	0.0604237
Charlie22a	hAT-Charlie	DNA	-0.613224	-0.203612	-0.585781	-0.0123717	-0.377311	-0.0575749	-0.0968807	-0.30845	-0.739143	-0.330676	-0.543156	-0.067914	-0.971984	-0.433562	0.147438	-0.104943	-0.124684	-0.290808	0.0586865	0.0444857
Charlie23a	hAT-Charlie	DNA	-0.363706	0.0663322	-0.552129	-0.0264358	-0.310293	-0.176793	-0.193066	-0.246142	-0.579526	-0.218533	-0.539451	-0.0643769	-0.635272	-0.368402	0.158865	0.0502177	0.09205	0.00374234	0.0814165	0.0162963
Charlie24	hAT-Charlie	DNA	-0.325815	0.0705023	-0.442457	0.0660498	-0.244862	-0.0192125	-0.090119	-0.249079	-0.754691	-0.264521	-0.409368	-0.080684	-0.854383	-0.398685	0.187624	-0.112186	-0.12913	-0.0932276	-0.0378019	0.118552
Charlie25	hAT-Charlie	DNA	-0.51633	0.442945	-0.447499	-0.268522	-0.398861	-0.223799	-0.0298177	-0.334861	-0.808698	-0.155064	-0.495676	-0.0159762	-1.15314	-0.368876	0.0398964	-0.0925819	-0.0533456	-0.0795556	-0.146648	-0.0696897
Charlie26a	hAT-Charlie	DNA	-0.188135	0.878918	-0.431135	0.0426806	-0.222305	0.0370139	-0.171508	-0.0254658	-0.0779088	0.797056	-0.436635	-0.0202489	0.0530445	-0.490408	0.465542	-0.1859	0.191301	-0.280177	0.20824	0.0917012
Charlie29a	hAT-Charlie	DNA	-0.572728	-0.0544699	-0.574949	-0.282137	-0.39572	-0.155876	-0.13864	-0.368914	-0.687069	-0.118679	-0.64876	-0.0577594	-0.577196	-0.356606	-0.0206145	-0.0900756	-0.0864461	-0.150374	-0.10319	-0.0834665
Charlie2a	hAT-Charlie	DNA	-0.673953	-0.376749	-0.586301	-0.323666	-0.422065	-0.171987	-0.0213122	-0.473734	-0.823536	-0.148512	-0.584932	0.0474294	-0.0989233	-0.36028	0.223064	-0.146339	-0.290739	-0.0433888	-0.144645	-0.0451851
Charlie2b	hAT-Charlie	DNA	-0.654053	-0.348283	-0.605194	-0.312814	-0.38792	-0.226791	-0.0389347	-0.398316	-0.960999	-0.224338	-0.720247	0.0471109	-0.197316	-0.400734	0.222716	-0.0459035	-0.312251	-0.20047	-0.125434	-0.0132947
Charlie3	hAT-Charlie	DNA	-0.190558	-0.543363	0.126404	0.139707	-0.34363	0.0280122	-0.0464366	-0.21995	-0.126048	-0.107894	0.261115	-0.213369	-1.30828	0.17096	-0.309867	-0.121714	-0.414686	-0.0754265	-0.135997	-0.0101884
Charlie30a	hAT-Charlie	DNA	-0.569529	0.0621627	-0.555461	0.198043	-0.315388	0.234481	-0.242057	-0.298797	-0.504961	-0.00696758	-0.642095	-0.0626208	-0.744172	-0.497429	0.465946	0.0165222	0.284056	-0.0983697	-0.152803	-0.198027
Charlie4	hAT-Charlie	DNA	-0.192807	0.00416921	-0.776146	-0.202328	-0.125785	-0.250198	-0.326948	-0.171782	-0.213258	-0.277384	-0.70744	-0.0145289	0.296799	-0.755241	-0.0056476	0.230628	-0.0905233	-0.0349436	0.0729134	0.311003
Charlie4a	hAT-Charlie	DNA	-0.266542	0.108164	-0.532378	-0.0563942	-0.205627	-0.170279	-0.110037	-0.162207	-0.38455	0.318682	-0.674183	0.0447284	0.434029	-0.434167	0.354782	-0.0725179	-0.0192821	-0.0894977	0.0091692	-0.0102814
Charlie4z	hAT-Charlie	DNA	0.171485	0.364181	-0.424815	0.277974	-0.0076622	0.142601	-0.241417	0.194446	0.0453617	0.04814	-0.48052	-0.0357909	0.242421	-0.272196	0.254317	0.0475596	0.243886	-0.0854183	0.0592611	0.0607287
Charlie5	hAT-Charlie	DNA	-0.714281	-0.00271418	-0.647446	-0.48724	-0.490271	-0.330942	0.000876261	-0.36351	-0.920236	-0.132878	-0.792855	0.0946295	-0.155966	-0.500524	0.17869	-0.0660976	-0.165844	-0.129544	0.0408283	0.0362542
Charlie6	hAT-Charlie	DNA	-0.664335	-0.530399	-0.472638	-0.129239	-0.328354	-0.0770092	-0.0239362	-0.19483	-0.808686	-0.112102	-0.478525	-0.0804487	-0.933673	-0.035423	0.109611	-0.226238	-0.316845	-0.26676	0.0125392	0.00502398
Charlie7	hAT-Charlie	DNA	-0.717358	-0.243329	-0.532452	-0.160623	-0.482706	-0.219447	-0.0574165	-0.513933	-0.981459	-0.212583	-0.665712	-0.00911804	-0.841368	-0.275219	0.127847	-0.162632	-0.231893	-0.177751	-0.0879604	0.000866261
Charlie7a	hAT-Charlie	DNA	-0.587451	-0.127209	-0.563886	-0.137596	-0.5297	-0.191116	-0.0700755	-0.140486	-0.959915	-0.179002	-0.634052	0.0574049	-0.288965	-0.421357	0.251821	-0.117737	0.0818847	-0.165585	0.249781	0.230105
Charlie8	hAT-Charlie	DNA	-0.33431	0.174715	-0.297803	0.116458	-0.353093	0.0671715	-0.223332	-0.144639	-0.48564	-0.193962	-0.346265	-0.122796	-0.895684	-0.190921	0.0642758	-0.227306	0.108011	-0.0778417	0.00734607	0.0777923
Charlie9	hAT-Charlie	DNA	-0.312125	-0.0413173	-0.437445	0.0677019	-0.270169	-0.089847	-0.0419321	-0.264577	-0.595907	-0.237793	-0.548476	0.0155786	-0.285569	-0.230337	0.219806	-0.177364	-0.0869388	-0.282402	-0.119887	0.00668079
Cheshire	hAT-Charlie	DNA	-0.609678	-0.0253001	-0.332004	-0.506066	-0.282294	-0.112607	0.181323	-0.550579	-0.729837	-0.254159	-0.0919779	-0.096839	-1.05108	0.0387358	-0.433654	-0.117797	-0.172624	-0.32722	0.0100681	0.00467782
Chompy-6_Croc	PIF-Harbinger	DNA	-0.680031	1.78035	-0.747397	0.46441	-0.416536	-0.13364	-0.967989	-0.0707705	-0.133803	-0.0440323	-1.27269	-1.96247	-1.22751	1.09002	0.138707	-0.343507	2.30714	-1.63779	-0.528004	-0.253945
Chompy-7_Croc	PIF-Harbinger	DNA	-0.712247	-0.540255	0.571015	0.738517	-0.0342111	1.06361	-0.287401	0.734892	-1.39822	-1.28785	-0.743413	-0.773435	-1.22721	-1.33008	-0.0266054	-0.18709	-0.19491	0.0683227	0.603124	-0.304727
DNA1_Mam	TcMar	DNA	-0.831802	0.354225	-0.863549	-0.458197	-0.525166	-0.0806053	0.00528583	-0.449411	-1.36027	-0.499062	-0.633452	-0.0395486	-0.924795	-0.0539044	0.536735	-0.238324	0.192732	-0.0963157	-0.0283383	-0.0841521
ERV24B_Prim-int	ERV1	LTR	-0.290018	-0.558564	-0.218594	0.547967	-0.318972	-0.17567	-0.100108	0.0558997	-0.944792	-0.700199	-0.281615	-0.0874181	-1.0242	-0.287944	0.598153	-0.287494	-0.480506	0.0374761	-0.058436	-0.0220013
ERV24_Prim-int	ERV1	LTR	-0.440783	-0.429692	-0.168389	0.366302	-0.330568	-0.103398	-0.14303	-0.208704	-0.783707	-0.62575	-0.251604	-0.105527	-1.12108	-0.256589	0.345983	-0.214629	-0.50327	0.0387604	-0.140364	-0.00387654
ERV3-16A3_I-int	ERVL	LTR	-0.333875	-0.933877	0.246018	0.287075	-0.406733	-0.322716	-0.201222	-0.116297	-0.387348	-0.616659	0.242031	-0.2048	-1.5197	-0.0818711	0.110984	-0.351781	-0.511532	0.308016	-0.1632	-0.115314
ERV3-16A3_LTR	ERVL	LTR	-0.309174	-0.332138	0.248705	0.318821	-0.412663	0.0720429	-0.37264	-0.0872804	-0.0966904	-0.318174	0.238135	-0.0632379	-1.36722	-0.144915	0.100374	-0.171444	-0.133369	0.384223	-0.251677	-0.257942
ERVL-B4-int	ERVL	LTR	-0.3741	-0.669158	0.130027	0.10258	-0.3383	-0.231519	-0.145411	-0.300916	-0.497227	-0.546591	0.173444	-0.199394	-1.39606	-0.126876	0.0918171	-0.328739	-0.610869	0.192709	-0.14497	-0.086423
ERVL-E-int	ERVL	LTR	-0.408541	-0.732853	0.029566	0.245936	-0.397938	-0.254008	-0.183237	-0.101158	-0.433378	-0.36938	0.0862375	-0.156369	-1.36889	-0.142072	0.170525	-0.361312	-0.497764	0.216237	-0.0898807	-0.0206188
ERVL-int	ERVL	LTR	-0.34777	-0.705347	0.14704	-0.0427072	-0.408737	-0.276655	-0.0794121	-0.271346	-0.428396	-0.500947	0.277568	-0.136923	-1.50714	-0.0949748	0.0156461	-0.334713	-0.545115	0.103502	-0.104409	-0.0247813
ERVL47-int	ERVL	LTR	-0.294377	-1.17116	0.416001	-0.0484633	-0.362519	-0.228004	0.0627687	-0.477301	-0.51405	-0.996114	0.345869	-0.354045	-1.53016	-0.105872	-0.000923191	-0.279604	-0.486887	0.209002	-0.12501	-0.0600152
Eulor1	DNA	DNA	-0.613441	-0.738728	-0.0487238	0.192569	-0.431276	-0.649646	-0.0629785	-0.401065	-0.689868	-0.299774	-0.895565	0.00368307	-1.10956	-0.281164	0.626527	-0.408201	-0.507872	0.00727432	0.0323455	0.0952663
Eulor10	DNA	DNA	-0.0501272	0.891418	-0.455549	0.0322663	-0.117049	0.373234	0.0706945	-0.521584	-0.477069	0.945693	-0.731704	-0.058492	-0.77182	-1.10637	-0.06581	0.707281	0.777892	0.545864	-0.183872	-0.199823
Eulor11	DNA	DNA	-0.328127	-0.667491	-0.326453	-0.241663	-0.0919375	0.472665	-0.0957006	0.258314	0.140017	0.345771	-0.49703	0.237245	-1.05096	-0.72724	0.388607	-0.193124	-0.923929	0.0320065	0.150051	-0.228255
Eulor12	DNA	DNA	-0.325579	0.135881	-0.141619	0.791635	-0.432362	-0.103189	-0.150541	-0.618158	-0.697093	0.317236	-0.433309	-0.452967	-0.802036	-0.413381	-0.351179	-0.891138	-0.179977	-0.0646632	-0.135392	-0.320162
Eulor2A	DNA	DNA	-0.550671	0.528516	-0.540357	0.0493524	-0.237997	0.209637	-0.55768	-0.496997	0.0225087	1.35305	-1.31865	-0.230397	-1.37848	-0.745366	0.169605	-0.472851	-0.234069	0.056807	-0.0453566	-0.731804
Eulor2B	DNA	DNA	-0.312465	0.252715	-0.433965	-0.0453461	-0.104976	-0.277071	-0.2937	-0.351884	0.313351	1.31806	-0.65922	0.0865126	-1.51602	-1.20453	-0.431197	0.444258	0.363364	0.525909	0.388233	0.238405
Eulor2C	DNA	DNA	-0.463476	-1.46465	-0.278102	-0.354086	-0.470559	-0.190157	-1.0139	-0.47712	-0.30674	0.0697117	-0.586676	-0.241499	-1.40519	-1.29348	0.328188	-0.525614	0.156391	0.533389	-0.149873	0.0315694
Eulor3	DNA	DNA	-0.652002	-0.632891	-0.00332621	-0.163246	-0.0523258	0.247611	0.143125	-0.197538	0.287827	0.653209	-0.849426	-0.31074	-1.34447	-1.05604	-0.521917	-0.291708	-0.775834	-0.0216556	-0.173627	-0.0900404
Eulor4	Unknown	Unknown	-0.671967	-0.508203	-1.04917	-0.346837	-0.121568	-0.388397	0.329823	-0.0268767	0.0110725	0.483076	-0.914816	0.615455	-3.8271	-1.39354	0.818154	0.211561	0.591115	0.506156	0.287267	0.765991
Eulor5A	DNA	DNA	0.00473904	0.879915	-0.48661	-0.074605	-0.0563504	0.24761	-0.247641	-0.411009	0.050846	0.33144	-0.414954	-0.181207	-1.27462	-0.433376	-0.0906838	-0.296612	-0.167704	0.0606565	-0.0500324	-0.0989165
Eulor5B	DNA	DNA	-0.627918	-0.262316	-0.113798	0.375459	-0.333471	-0.271838	-0.647289	-0.0162895	0.126935	1.7668	-0.163388	-0.0754531	-1.44851	-0.388789	0.14895	-0.585811	1.21736	0.469914	-0.0825936	-0.941381
Eulor6A	DNA	DNA	-0.124595	-0.663535	0.176672	0.662075	-1.18424	-0.00366352	-0.447379	-0.273929	-0.536879	0.0531697	-1.40246	-0.648172	-0.815976	-1.88543	0.340314	0.078256	0.235488	-0.109563	-0.392216	-0.334991
Eulor6B	DNA	DNA	-0.439833	-0.335292	-0.215795	0.405748	-0.356271	-0.416831	-0.699692	0.0820452	0.4073	0.941682	-0.267147	0.38722	-1.83373	-1.06288	0.0989945	-0.104105	0.599402	0.545153	0.114789	0.258557
Eulor6C	DNA	DNA	-0.389327	-0.501038	-1.42789	-0.128808	-1.46186	-0.290524	0.118859	-0.69761	-0.435961	0.926328	0.279246	0.979822	-1.97065	-0.0802596	0.26485	0.1759	0.278859	1.03964	-0.684426	-1.0913
Eulor6D	DNA	DNA	0.385257	0.21192	-0.43445	0.231177	0.0848807	-0.0205952	-0.195544	-0.482325	0.657398	1.3778	-0.488867	0.193209	0.83954	-0.464161	0.0974595	0.24126	-0.036602	0.608001	-0.142116	-0.00513937
Eulor6E	DNA	DNA	0.0741635	0.767529	-0.434788	-0.314741	-0.0079358	0.846333	-0.142998	-0.0135246	0.606844	1.23055	-0.485427	0.345303	-0.880856	0.100105	-0.764861	0.257485	0.469791	0.887968	-0.110634	-0.195791
Eulor7	DNA	DNA	0.181598	0.250845	-0.915013	-0.548437	0.0110991	-0.215035	0.11729	-0.586023	-0.201053	0.585201	-1.14513	-0.667892	-1.51096	0.880828	1.30818	0.063654	-1.31426	0.339501	-0.89329	0.199734
Eulor8	TcMar	DNA	-0.347488	-0.364157	-0.200344	-0.152233	-0.136319	-0.115107	-0.308096	-0.656378	0.0386371	0.815229	-0.343046	0.111589	-0.773304	-0.744134	0.0349346	0.118047	-0.465839	0.192203	-0.203048	-0.0964948
Eulor9A	DNA	DNA	-0.362087	0.252321	-0.424291	-0.349507	-0.165294	-0.0527788	-0.191948	-0.115703	0.156249	1.11286	-0.538291	-0.01092	-0.218771	-0.577535	-0.170843	-0.252644	0.473653	0.0446562	0.238051	-0.00419812
Eulor9B	DNA	DNA	-0.154459	-0.347247	-0.339907	0.163774	0.104006	0.530557	1.01455	-0.415594	-0.546827	0.83663	-0.392124	0.244237	-0.635737	-0.368433	-0.318141	1.30619	1.79462	0.285716	0.678495	-0.18773
Eulor9C	DNA	DNA	0.0703657	0.264416	-0.672838	-0.643834	0.271876	0.37211	-0.0607007	-0.279504	0.123007	0.898706	-0.758932	0.0252915	1.23332	-0.523657	-0.160374	0.89165	0.408089	-0.129846	0.276013	-0.125979
FAM	Alu	SINE	-0.435417	-0.0780055	-0.0596407	-0.0404364	-0.403331	0.0945868	-0.180994	-0.2617	-0.572757	-0.325487	-0.153488	-0.0411082	-1.18964	0.274045	-0.590189	-0.185288	0.0865818	-0.0568563	0.071749	0.0971441
FLAM_A	Alu	SINE	-0.309249	0.1065	-0.138439	0.00644213	-0.405863	0.0307813	-0.184821	-0.232183	-0.517309	-0.202249	-0.274251	0.0289343	-0.941398	0.155527	-0.502184	-0.218321	0.0777723	-0.141696	0.129167	0.143715
FLAM_C	Alu	SINE	-0.246859	0.224365	-0.145648	-0.00415076	-0.329042	0.0337846	-0.162902	-0.177201	-0.482028	-0.173846	-0.269534	0.0234744	-0.682376	0.155174	-0.389723	-0.192444	0.103943	-0.15928	0.218265	0.226261
FRAM	Alu	SINE	-0.00681682	0.209442	-0.0405706	0.115092	-0.259327	0.11517	-0.208052	-0.0545776	-0.149922	-0.0570216	-0.152764	-0.00982634	-0.374045	0.169768	-0.428437	-0.134311	0.0652712	-0.0800291	0.151755	0.128116
FordPrefect	hAT-Tip100	DNA	-0.39156	-0.473007	0.290466	0.033413	-0.388799	-0.312376	-0.218941	0.14305	-0.298866	-0.570607	0.386248	0.100328	-1.51086	-0.0611456	-0.0617407	-0.283887	-0.560385	0.42404	-0.0991281	-0.0240435
FordPrefect_a	hAT-Tip100	DNA	-0.265574	-0.423941	0.541271	0.382338	-0.553269	-0.0885017	-0.246725	0.682711	-0.49566	-0.244831	0.213179	-0.0809221	-1.2823	-0.0390028	0.271704	-0.570018	-0.18743	0.374032	-0.160325	-0.0783203
HAL1	L1	LINE	-0.537918	-0.405762	-0.321367	0.0319375	-0.306306	0.0801113	-0.0273582	-0.320484	-0.890789	-0.415857	-0.206929	-0.0660708	-1.03669	0.103391	0.222797	-0.201897	-0.136917	-0.145026	-0.0819457	-0.0494609
HAL1M8	L1	LINE	-0.67076	-0.589126	-0.35705	-0.178494	-0.344441	-0.0586899	0.0412782	-0.493968	-0.981266	-0.398006	-0.236914	0.0251675	-1.13384	0.0675466	0.139647	-0.179517	-0.398997	-0.139316	-0.169796	-0.135222
HAL1ME	L1	LINE	-0.667413	-0.28159	-0.463175	-0.177203	-0.315693	-0.0528188	-0.0404034	-0.4026	-0.988847	-0.380744	-0.412164	-0.0448331	-0.743934	-0.0459653	0.273543	-0.138262	-0.24672	-0.115219	-0.12088	-0.0484986
HAL1b	L1	LINE	-0.700323	-0.403661	-0.511773	-0.190654	-0.42853	-0.210133	0.0124107	-0.25855	-1.09869	-0.272776	-0.493785	0.05416	-0.881846	-0.186057	0.342487	-0.153118	-0.256098	-0.0707068	-0.211407	-0.0666169
HERV-Fc1-int	ERV1	LTR	0.462277	-1.68842	1.61659	-0.414451	-0.0823712	-0.572191	0.251376	-0.0805571	-0.111447	-0.728256	0.797462	-0.248739	-1.64625	0.501123	-0.132523	-0.77924	-0.589314	-0.439472	0.0640374	0.0824903
HERV-Fc1_LTR1	ERV1	LTR	0.262049	-0.534062	1.37547	0.527502	-0.434582	0.193953	0.841508	-0.00628657	0.0177174	-1.8463	0.71656	-0.350295	-1.99837	1.08175	-0.731685	-0.523768	-1.71162	-1.80205	0.0784089	0.544962
HERV-Fc1_LTR2	ERV1	LTR	0.927187	-0.255527	1.81677	-1.32607	-1.69058	-0.498343	-0.835996	-0.675142	-0.602256	-3.63433	1.8355	-2.62182	-0.367608	1.18083	-0.278498	-0.924	NA	0.699171	-0.444245	-0.299972
HERV-Fc1_LTR3	ERV1	LTR	0.756722	0.144709	1.4886	-0.418416	-0.445252	0.655145	0.890319	0.433115	0.579658	-1.39204	1.10129	-0.482561	-2.08411	0.223976	-0.983212	0.654283	-1.62398	-1.29043	-0.501393	0.469625
HERV-Fc2-int	ERV1	LTR	0.409825	-1.35435	1.74875	-0.0666598	-0.250379	-0.189133	-0.151434	-0.621161	-0.167515	-0.848622	1.39728	-0.625723	-2.01989	1.29141	-0.225177	-0.253225	-2.14075	-0.0802924	-0.241843	0.0347608
HERV-Fc2_LTR	ERV1	LTR	1.48623	NA	1.70069	2.87559	-3.21434	-0.186228	-0.498375	-0.608088	-0.350497	-0.261364	-1.1502	0.869801	NA	1.08919	-2.59627	NA	-0.340075	-2.27851	0.802642	0.071191
HERV15-int	ERV1	LTR	1.59083	0.0660865	0.0364673	0.55039	0.58575	0.0262962	-0.0911827	-0.144797	-0.192581	-0.421319	-0.108828	-0.0301262	1.53756	-0.245346	0.409958	0.735971	0.623306	0.305204	0.0904678	-0.101745
HERV16-int	ERVL	LTR	-0.359021	-1.01675	0.159807	0.299059	-0.422443	-0.246369	-0.184362	-0.167201	-0.546621	-0.586575	0.134457	-0.149122	-1.46553	-0.157997	0.261382	-0.355858	-0.459059	0.237275	-0.188222	-0.0934179
HERV17-int	ERV1	LTR	-0.399732	-1.42075	0.27093	0.314201	-0.209645	0.18682	-0.10239	-0.285165	-0.613007	-0.702007	0.287563	-0.272378	-1.40919	0.281102	0.418751	-0.377264	-0.572423	0.240611	0.0605483	0.0187321
HERV1_I-int	ERV1	LTR	-0.286873	-1.12663	0.228597	0.61823	0.00508766	-0.208089	0.158037	-0.227582	-0.34864	-0.722552	0.182206	-0.231338	-1.2201	-0.11027	0.542715	-0.126958	-0.107837	0.584197	-0.0471819	-0.0977282
HERV1_LTRa	ERV1	LTR	-0.615894	-1.21428	-0.179936	0.127733	-0.235277	0.083127	0.186483	-0.113838	-0.423469	-0.195194	0.344927	0.169905	-1.77643	0.0346899	0.146533	-0.296266	-0.0181879	-0.042709	-0.298098	-0.112445
HERV1_LTRb	ERV1	LTR	1.55905	1.6126	0.587183	0.598801	1.13506	1.0231	0.154933	0.223774	1.59907	1.97217	0.0673055	0.338412	0.211841	-0.651026	-0.20076	0.932031	0.751447	-0.311723	-0.0672723	-0.32772
HERV1_LTRc	ERV1	LTR	-0.577925	-1.3793	0.163583	0.389713	0.0343359	-0.323014	0.318191	-0.143099	-1.08943	-0.626464	-0.220608	-0.335177	-1.81044	0.132534	0.637885	-1.291	-0.574724	0.00917901	0.254679	0.104953
HERV1_LTRd	ERV1	LTR	-0.327607	0.21796	0.210317	0.357059	-0.159433	0.0795854	-0.293314	-0.758453	0.275316	0.71565	-0.265735	-0.23963	2.57182	0.110969	0.183023	-0.188698	1.26391	0.421917	-0.0636376	-0.120163
HERV1_LTRe	ERV1	LTR	-0.61615	-1.43917	0.842005	0.116428	-0.537324	-0.747282	0.0214769	-0.679041	-0.89788	-0.97376	0.496709	-0.428354	-0.948851	0.545422	-0.0360489	0.108904	-0.284272	0.866144	-0.0182459	0.0998809
HERV3-int	ERV1	LTR	0.172493	-0.252612	0.470105	0.422001	-0.0209792	0.0394346	0.0624868	-0.259373	-0.588424	-0.853499	0.186944	-0.253161	-0.590697	0.445585	0.546984	0.127988	-0.154789	0.438239	0.0658782	-0.0159526
HERV30-int	ERV1	LTR	-0.184001	-1.09799	0.378931	-0.13551	-0.273131	-0.230859	-0.293526	-0.55726	-0.632173	-0.882697	0.110235	-0.282997	-0.792904	0.00403401	0.16468	-0.215634	-0.537339	0.187664	-0.0937089	0.00685727
HERV35I-int	ERV1	LTR	-0.369937	-0.455069	0.175396	-0.120732	-0.0751275	-0.241158	0.278762	-0.45019	-1.00283	-0.571087	0.12094	-0.129305	-0.328295	0.0489293	0.136057	-0.193702	-0.679876	0.00388648	0.0743978	0.150078
HERV4_I-int	ERV1	LTR	-0.1977	-1.14639	0.388555	0.217513	-0.291601	-0.40448	-0.00375426	-0.209412	-0.644022	-0.818863	0.281783	-0.267293	-1.30941	0.313243	0.380981	-0.439967	-0.664976	0.27219	0.0374404	0.0905509
HERV9-int	ERV1	LTR	-0.287205	-1.34235	0.400152	0.107177	-0.261665	-0.191934	-0.0602493	-0.331081	-0.507918	-0.771846	0.348632	-0.169261	-1.21811	0.32124	0.350861	-0.556567	-0.798991	0.230784	-0.0805284	0.0073484
HERV9N-int	ERV1	LTR	-0.355433	-1.34494	0.375706	0.12153	-0.124574	-0.142734	-0.0731386	-0.350525	-0.41709	-0.730815	0.377512	-0.144817	-0.884818	0.339886	0.345765	-0.344791	-0.624568	0.37012	-0.0605265	0.0037932
HERV9NC-int	ERV1	LTR	-0.320016	-1.33847	0.393709	0.16061	0.166808	-0.104423	-0.0587536	-0.306057	-0.236404	-0.757715	0.441668	-0.165521	-0.342031	0.419094	0.241343	-0.431758	-0.80326	0.274687	-0.0666897	0.00832235
HERVE-int	ERV1	LTR	-0.254885	-1.00176	0.508766	0.877043	-0.0813509	0.298176	-0.215317	0.176582	-0.387402	-0.732064	0.340379	-0.218	-1.29014	0.17833	0.749119	-0.406488	-0.6112	0.444888	0.119381	-0.155075
HERVE_a-int	ERV1	LTR	-0.15511	-1.06092	0.485057	0.172936	-0.158336	-0.0379477	0.0813264	-0.314929	-0.517986	-0.818976	0.289838	-0.199315	-1.33224	0.222108	0.311745	-0.391609	-0.564438	0.35795	-0.00738742	0.0227343
HERVFH19-int	ERV1	LTR	-0.161186	-1.09497	0.414315	0.907074	-0.108223	-0.126061	0.169955	0.371401	-0.405398	-0.164409	0.342095	-0.122232	-1.09279	0.534869	1.00206	-0.233634	-0.383042	0.20787	0.0637149	-0.0134501
HERVFH21-int	ERV1	LTR	-0.169988	-0.936815	0.697139	0.615304	-0.20382	-0.0140304	-0.121622	0.220757	-0.634909	-0.774378	0.384331	-0.335662	-1.49525	0.406975	0.487591	-0.337051	-0.700663	0.451722	-0.13494	-0.155727
HERVH-int	ERV1	LTR	-0.285992	-1.0429	0.275928	0.396906	-0.1935	-0.00865392	-0.158208	0.482454	-0.768682	-0.68021	0.0578979	-0.0462753	-1.35602	0.122626	0.568607	-0.397759	-0.64614	0.311652	-0.0026995	0.034949
HERVH48-int	ERV1	LTR	-0.121408	-1.42219	0.588771	-0.0351647	-0.383782	-0.289907	0.00865298	0.146376	-0.572411	-1.0415	0.586452	-0.456677	-1.54415	0.441516	0.118481	-0.360571	-0.349459	0.346752	-0.0124297	0.0285219
HERVI-int	ERV1	LTR	-0.0410629	-1.20309	0.515446	0.183211	0.831147	0.613768	-0.0508409	0.466624	0.131213	-0.0125685	0.241527	-0.0962858	-0.590072	0.469845	0.331303	-0.289264	-0.488095	0.147669	-0.0550913	0.0319961
HERVIP10B3-int	ERV1	LTR	0.0638422	-0.484146	0.547326	0.191066	0.742483	0.834123	-0.0998844	-0.322899	0.16895	-0.0758144	0.113204	-0.237864	-0.939258	0.845498	0.217224	-0.251525	-0.177718	0.170971	0.0701496	0.0600727
HERVIP10F-int	ERV1	LTR	-0.240554	-0.994749	0.4626	0.178936	-0.120226	0.0560948	0.0234293	0.386175	-0.63164	-0.538573	0.159742	-0.0616447	-1.32403	0.350446	0.583965	-0.293483	-0.645189	0.414689	0.0321011	0.142196
HERVIP10FH-int	ERV1	LTR	-0.0424683	-0.188732	0.357173	0.271477	0.284256	0.317334	0.117957	-0.147794	-0.41535	-0.349002	-0.127191	0.148018	-0.528886	0.463746	0.310215	-0.130103	-0.306457	0.28261	0.000123758	-0.0440375
HERVK-int	ERVK	LTR	-0.286963	-1.54742	-0.0189365	0.617912	-0.0203547	-0.50378	0.147667	0.348072	-0.68974	-0.476852	0.0871861	0.142722	-1.16919	-0.0734734	0.826332	-0.135698	-0.085677	0.127843	0.129936	0.229014
HERVK11-int	ERVK	LTR	-0.177872	-1.12914	0.411854	0.185535	0.263824	-0.061864	0.402424	-0.112826	-0.611293	-0.646268	0.39695	-0.0912072	-1.33437	0.166584	0.313921	-0.438162	-0.818456	0.24546	0.14046	0.200003
HERVK11D-int	ERVK	LTR	-0.699003	-1.47337	-0.0347094	0.0295158	-0.0680712	-0.525177	0.219715	-0.649182	-0.81637	-0.419158	0.0181782	0.0733434	-1.39933	-0.201394	0.18723	-0.171598	-0.616632	0.146681	0.0971423	0.260584
HERVK13-int	ERVK	LTR	-0.277753	-0.444896	-0.108032	0.0633672	-0.19254	-0.00770401	-0.0895019	-0.343087	-0.685189	-0.655872	-0.14663	-0.278273	-1.53307	-0.240451	0.259497	-0.456953	-0.727138	0.231825	0.178867	0.099198
HERVK14-int	ERVK	LTR	-0.333687	-1.0687	0.391707	0.427408	0.114639	0.403504	0.425541	-0.176988	-0.428888	-0.232662	0.301523	-0.13578	-1.20575	0.333099	0.559263	-0.282886	-0.477715	0.389038	0.206019	0.17458
HERVK14C-int	ERVK	LTR	-0.235323	-1.35604	0.393895	0.151016	-0.118392	-0.488061	0.283565	0.00794705	-0.440125	-0.453318	0.302871	0.00199165	-1.17477	0.0450915	0.530826	-0.332649	-0.630096	0.00744069	-0.018216	0.104867
HERVK22-int	ERVK	LTR	-0.208937	-1.2194	0.319203	0.112778	0.0455689	-0.0404308	0.265408	-0.136074	-0.340049	-0.449863	0.433264	-0.162852	-1.19783	0.315363	0.122311	-0.214112	-0.529812	0.141546	0.0266953	0.0641819
HERVK3-int	ERVK	LTR	-0.307744	-0.947748	0.243554	0.484658	-0.162806	-0.159592	0.0606355	-0.0027914	-0.604612	-0.512243	0.135974	-0.157967	-1.48901	0.21026	0.192269	-0.363705	-0.521401	0.176797	0.0365613	0.0494768
HERVK9-int	ERVK	LTR	-0.281043	-1.34516	0.377348	0.433415	0.0310288	-0.339615	0.401078	-0.17972	-0.609003	-0.465101	0.328413	-0.0741799	-1.22714	0.348971	0.577065	-0.27994	-0.561008	0.329621	0.156737	0.243168
HERVKC4-int	ERVK	LTR	0.62741	-0.349975	0.295272	-0.327666	0.425814	0.0756935	0.263464	-0.630546	0.0251345	-0.300394	-0.083795	0.00811949	0.95633	0.494342	0.343229	0.616753	0.0662079	-0.208254	0.307031	0.0324365
HERVL-int	ERVL	LTR	-0.245716	-1.18377	0.58205	-0.128182	-0.289738	-0.464241	0.0345989	-0.20655	-0.390477	-0.650079	0.654754	-0.141228	-1.50264	0.315802	-0.164292	-0.413215	-0.846165	0.24213	-0.147581	-0.0638559
HERVL18-int	ERVL	LTR	-0.0406718	-0.660775	0.88352	-0.0873267	-0.440151	-0.387942	-0.170303	-0.50083	-0.101222	-0.985146	0.883254	-0.528983	-1.59689	0.300999	-0.327268	-0.216457	-0.298534	0.256935	-0.140334	-0.164707
HERVL32-int	ERVL	LTR	-0.356983	-1.42725	0.795087	-0.00466446	-0.261727	-0.287575	0.189949	-0.346161	-0.34005	-1.52414	0.720223	-0.600774	-1.61854	-0.135187	0.0208666	-0.444005	-0.943851	0.561082	-0.184855	-0.135634
HERVL40-int	ERVL	LTR	-0.2009	-0.103942	0.119222	0.032493	-0.361919	-0.0513017	-0.213922	-0.487435	-0.282899	-0.482954	0.136283	-0.233045	-1.22309	-0.1322	-0.249245	-0.302441	-0.101618	0.142342	-0.127292	-0.0880474
HERVL66-int	ERVL	LTR	-0.390335	-1.59688	0.225787	0.234869	-0.453936	-0.389978	-0.0477895	-0.282246	-0.919812	-0.928184	0.49021	-0.0818409	-1.83131	0.253268	0.562153	-0.3515	-0.72695	0.483855	-0.066377	0.0409266
HERVL74-int	ERVL	LTR	-0.397269	-0.885153	0.319988	0.158698	-0.381137	-0.294989	0.0709871	-0.315458	-0.746547	-0.396707	0.0852418	-0.100128	-1.48661	-0.0995782	0.0443228	-0.310582	-0.476284	0.265062	-0.161839	-0.0217185
HERVP71A-int	ERV1	LTR	-0.199045	-0.45841	0.348664	0.103937	-0.11438	0.258837	0.0394025	-0.4066	-0.518367	-0.830648	0.505883	-0.220486	-0.866025	0.112421	0.423136	-0.281518	-0.494166	0.200233	0.096583	0.107949
HERVS71-int	ERV1	LTR	-0.184575	-1.33038	0.460022	0.784262	0.110846	-0.0925137	-0.0968698	1.51649	0.125863	0.591695	0.117719	0.265315	-1.18581	0.0229663	0.752191	-0.172588	-0.673151	0.611394	-0.0800908	-0.0421047
HSMAR1	TcMar-Mariner	DNA	-0.430841	-1.5033	0.0162493	0.0660352	-0.32477	-0.308788	0.040258	-0.240012	-0.71079	-0.559931	0.159821	-0.0606415	-1.4056	0.0850213	-0.161734	-0.162153	-0.538852	0.116532	-0.115623	-0.0877452
HSMAR2	TcMar-Mariner	DNA	-0.398735	-0.832233	0.0181134	0.154322	-0.214875	-0.17601	0.129255	-0.267069	-0.836178	-0.500325	0.0398595	-0.0383346	-1.23821	0.0915862	0.216781	-0.304028	-0.45198	-0.181683	-0.0216186	0.0663678
HUERS-P1-int	ERV1	LTR	-0.380328	-1.08546	0.266481	-0.00507013	-0.0561532	-0.154278	0.373133	-0.326431	-0.93279	-0.560181	0.287462	-0.0850158	-1.15866	0.478188	0.432279	-0.188976	-0.500799	0.0147691	-0.0067228	0.014953
HUERS-P2-int	ERV1	LTR	-0.300111	-1.4891	0.739303	0.27887	-0.236378	-0.127497	0.000607165	-0.364558	-0.502903	-1.03136	0.570423	-0.28935	-1.43099	0.0874878	0.224697	-0.530883	-0.940469	0.423519	-0.0427586	-0.0501966
HUERS-P3-int	ERV1	LTR	-0.203502	-0.691041	0.628985	0.242689	-0.0989897	-0.266082	0.265482	-0.254866	-0.532856	-0.818354	0.607571	-0.2001	-1.31527	0.498254	0.0934448	-0.284672	-0.657798	0.207662	-0.130574	0.00188169
HUERS-P3b-int	ERV1	LTR	-0.387061	-1.12675	0.440005	-0.0452102	0.00318617	-0.385062	0.398364	-0.463953	-0.748058	-0.491438	0.539465	-0.0944968	-1.20994	0.641233	-0.0794015	-0.241002	-0.650135	0.00790392	-0.0329685	0.14798
Harlequin-int	ERV1	LTR	-0.471586	-1.09209	0.0476902	0.144042	-0.244582	-0.206009	0.0462676	-0.368211	-0.965591	-0.534866	-0.045494	-0.0278322	-0.581395	0.186271	0.308207	-0.277391	-0.461429	0.144176	0.051892	0.126483
Helitron1Na_Mam	Helitron	RC	-0.594373	-0.653396	-0.337087	-0.165474	-0.51642	-0.341388	-0.106405	-0.446859	-0.729562	0.0397162	-0.793329	-0.0777275	-1.0757	-0.440798	0.118071	-0.141918	-0.220332	0.125597	-0.0257376	0.120797
Helitron1Nb_Mam	Helitron	RC	-0.821038	-0.166886	-0.703775	-0.22326	-0.511417	-0.251771	-0.163644	-0.350811	-0.875396	-0.216612	-0.667763	0.0458359	-0.66906	-0.723936	0.078937	-0.250183	-0.685021	-0.126222	-0.362984	-0.187841
Helitron3Na_Mam	Helitron	RC	-0.32857	-0.315587	-0.218926	0.0642504	-0.266253	0.0670757	-0.136612	-0.19287	-0.432928	-0.137062	-0.24729	-0.00904015	-0.99393	-0.329351	-0.125279	-0.127097	-0.0230167	0.11316	-0.0682988	-0.0641252
Kanga1	TcMar-Tc2	DNA	-0.501751	-0.654301	-0.385694	-0.0638387	-0.37932	-0.193709	-0.157897	-0.0826288	-0.715023	-0.0957073	-0.536844	-0.0927276	-1.18203	-0.375531	-0.1151	-0.0986795	-0.261985	0.0850492	-0.0115173	-0.0253949
Kanga11a	TcMar-Tc2	DNA	-0.48521	-0.183114	-0.522392	-0.279578	-0.3268	-0.0894799	-0.0614399	-0.39856	-0.549408	0.0231684	-0.489643	-0.137069	-0.773185	-0.409729	0.00117429	-0.163277	-0.102004	-0.0673237	-0.0604835	-0.00710035
Kanga1a	TcMar-Tc2	DNA	-0.565568	-0.572079	-0.434598	-0.204387	-0.499643	-0.21147	-0.118991	-0.451599	-0.723546	-0.222972	-0.386408	-0.0949466	-1.30094	-0.505063	-0.249596	-0.0748277	-0.38743	-0.0690821	-0.159609	-0.102871
Kanga1b	TcMar-Tc2	DNA	-0.460135	0.366397	-0.331409	-0.204219	-0.317064	-0.0453567	-0.0642175	-0.377306	-0.801651	0.0106237	-0.553979	0.00707224	-1.21947	-0.522468	0.0886156	-0.0774786	-0.460343	-0.0498293	0.0192609	-0.0398707
Kanga1c	TcMar-Tc2	DNA	-0.504536	-0.374432	-0.460553	-0.119133	-0.248605	-0.0616067	-0.0733244	-0.260463	-0.525601	0.0466105	-0.430223	0.00748187	-1.08414	-0.293029	0.079332	-0.235468	-0.157914	-0.231986	-0.184202	-0.110667
Kanga1d	TcMar-Tc2	DNA	-0.595153	-0.445962	-0.47522	-0.0404503	-0.355512	-0.273362	-0.0379945	-0.387453	-0.684076	0.0145428	-0.410215	0.0216242	-0.805536	-0.27946	0.00769343	-0.346532	-0.327773	-0.0288823	-0.0216952	0.0955084
Kanga2_a	TcMar-Tc2	DNA	-0.810991	-0.403429	-0.641807	-0.246556	-0.422964	-0.0695603	0.000293923	-0.344515	-1.04502	-0.222215	-0.622588	-0.0235678	-0.934635	-0.354946	0.145908	-0.0732485	-0.0993829	-0.173732	-0.193405	-0.0692574
L1HS	L1	LINE	-0.0924117	-1.61606	0.572286	-0.0641548	0.310007	-0.382767	0.55339	-0.260132	-0.488982	-0.420306	0.979477	0.0939778	-0.793268	0.838052	-0.318321	-0.271813	-0.761725	-0.066159	0.0915156	0.168144
L1M	L1	LINE	-0.777183	-0.443472	-0.579208	-0.315163	-0.373211	-0.2386	0.02555	-0.261173	-1.05295	-0.334653	-0.557032	-0.0220251	-0.898019	-0.0156531	0.238141	-0.0162679	-0.17366	-0.180096	-0.248541	0.120095
L1M1	L1	LINE	-0.535337	-1.07281	0.108787	-0.279894	-0.188779	-0.370601	0.1606	-0.29515	-0.700822	-0.445196	0.291013	0.0106962	-0.808576	0.211305	0.0321597	-0.211837	-0.643399	-0.0409848	-0.286858	-0.19727
L1M2	L1	LINE	-0.63071	-1.09206	0.0317873	-0.331496	-0.189445	-0.45113	0.21269	-0.384794	-0.902057	-0.431793	0.296287	0.00700933	-1.03957	0.411222	0.0397171	-0.212308	-0.617105	-0.1626	-0.261526	-0.135371
L1M2a	L1	LINE	-0.341651	-0.850684	0.459518	-0.21448	-0.208271	-0.334257	0.231569	-0.484798	-0.560131	-0.583401	0.621232	-0.122608	-1.40764	0.41724	-0.116476	-0.250254	-0.593476	-0.0370598	-0.321838	-0.256975
L1M2a1	L1	LINE	-0.339331	-1.17594	0.467488	-0.100116	-0.293243	-0.270029	0.184631	-0.488786	-0.714567	-0.482406	0.661677	-0.172024	-1.41018	0.264977	-0.0972829	-0.605438	-0.53601	0.121072	-0.264874	-0.174684
L1M2b	L1	LINE	-0.381921	-1.40115	0.55076	-0.388916	-0.163879	-0.342353	0.158157	-0.358549	-0.276918	-0.677126	0.750907	-0.144208	-1.45082	0.320378	-0.226332	-0.481011	-0.984892	-0.0656772	-0.102698	-0.100921
L1M2c	L1	LINE	-0.435414	-0.925821	0.495326	-0.360886	-0.0886737	-0.366177	0.313858	-0.380261	-0.644734	-0.639873	0.718781	-0.0796843	-1.31217	0.621387	-0.212772	-0.358422	-0.718692	-0.218927	-0.182052	-0.161801
L1M3	L1	LINE	-0.659894	-0.875456	-0.252762	-0.309491	-0.228758	-0.417841	0.19134	-0.34305	-1.00897	-0.373096	0.0238649	0.0503093	-0.808309	0.151716	0.235163	-0.146947	-0.49824	-0.117753	-0.207409	-0.109337
L1M3a	L1	LINE	-0.126124	-0.739198	0.432685	-0.6036	0.166006	-0.388413	0.340326	-0.592569	-0.596467	-0.592721	0.666103	-0.11363	-0.43502	0.704922	-0.36329	-0.468975	-0.783658	-0.0870608	-0.20275	-0.0550777
L1M3b	L1	LINE	-0.446163	-1.20159	0.338924	-0.384204	-0.245927	-0.348305	0.265205	-0.382515	-0.843438	-0.618157	0.422572	-0.124113	-1.05953	0.316261	0.0306856	-0.124063	-0.798846	-0.0806087	-0.312904	-0.201216
L1M3c	L1	LINE	-0.490631	-0.842852	0.304086	-0.227602	-0.182922	-0.335251	0.235412	-0.417068	-0.755999	-0.505674	0.469488	-0.0675582	-0.981427	0.381547	-0.0144251	-0.148194	-0.56628	-0.121007	-0.196376	-0.0746689
L1M3d	L1	LINE	-0.523557	-0.997799	0.0983173	-0.188826	-0.197585	-0.117532	0.103438	-0.519244	-0.694565	-0.490395	0.31118	-0.128072	-1.17056	0.160254	-0.00728948	-0.214096	-0.733631	-0.0502904	-0.116283	-0.147102
L1M3de	L1	LINE	-0.416087	-0.924937	0.181194	-0.0609019	-0.0774672	-0.0900808	0.187746	-0.377925	-0.725012	-0.299353	0.358291	-0.236412	-1.05686	0.271325	0.179627	-0.187944	-0.768862	-0.0612945	-0.244474	-0.185115
L1M3e	L1	LINE	-0.495801	-0.860784	0.451627	-0.530701	-0.219137	-0.319155	0.189244	-0.591422	-0.633107	-0.580741	0.563527	-0.126506	-1.35348	0.380022	-0.348782	-0.15339	-0.665628	0.0677942	-0.218293	-0.113594
L1M3f	L1	LINE	-0.487706	-0.719758	-0.0308798	-0.200878	-0.198851	-0.393431	0.19593	-0.445843	-0.822445	-0.566969	0.345009	-0.0667695	-1.18902	0.523561	0.108872	-0.148126	-0.630762	-0.0998567	-0.164915	-0.128617
L1M4	L1	LINE	-0.6885	-0.760524	-0.252355	-0.273692	-0.267887	-0.307099	0.168916	-0.27207	-1.02975	-0.405897	-0.0394595	0.0347594	-0.793917	0.28452	0.241078	-0.137793	-0.453339	-0.190074	-0.183317	-0.0857838
L1M4a1	L1	LINE	-0.71639	-0.547249	-0.280191	-0.371948	-0.244068	-0.151491	0.160869	-0.477401	-1.0472	-0.245434	-0.0838113	0.034518	-0.90451	0.260049	0.105466	-0.183048	-0.494794	-0.181831	-0.218461	-0.120264
L1M4a2	L1	LINE	-0.617344	-0.691958	-0.139587	-0.340923	-0.318141	-0.204524	0.111282	-0.394932	-0.970715	-0.393591	-0.0133454	-0.03769	-1.15916	0.244242	-0.0219114	-0.195316	-0.465489	-0.207665	-0.222183	-0.154163
L1M4b	L1	LINE	-0.532116	-0.925364	-0.0043387	-0.32263	-0.213221	-0.218092	0.192957	-0.369697	-0.781496	-0.37606	0.0576914	0.0329033	-0.617933	0.17059	0.0866326	-0.0955601	-0.399206	-0.090896	-0.176774	-0.139512
L1M4c	L1	LINE	-0.627339	-0.939927	-0.0343116	-0.320545	-0.164148	-0.29039	0.302383	-0.346208	-0.956051	-0.357549	0.183245	0.00771058	-0.767765	0.479079	0.0873034	-0.174006	-0.586277	-0.182996	-0.272059	-0.162324
L1M5	L1	LINE	-0.898817	-0.571784	-0.571105	-0.400251	-0.41629	-0.340253	0.0730548	-0.392252	-1.18598	-0.260474	-0.548987	0.0671179	-0.591328	-0.146925	0.326775	-0.142723	-0.397027	-0.185886	-0.276818	-0.183007
L1M6	L1	LINE	-0.658228	-0.525581	-0.473263	-0.187706	-0.348019	-0.186326	-0.00971721	-0.42002	-0.940923	-0.234213	-0.41618	0.016716	-0.630603	-0.20858	0.273943	-0.143679	-0.30957	-0.0407596	-0.197341	-0.121368
L1M6B	L1	LINE	-0.568424	-0.35314	-0.450809	0.140337	-0.284637	0.0356699	-0.0818262	-0.0632299	-0.792486	-0.463537	-0.24097	-0.122194	-1.00278	-0.0996662	0.357757	-0.153881	-0.0731861	-0.120404	-0.127167	-0.0451525
L1M7	L1	LINE	-0.680364	-0.681799	-0.33715	-0.227817	-0.354166	-0.217623	0.0663163	-0.427226	-1.04638	-0.36253	-0.241842	0.00771792	-0.980814	-0.00124716	0.272259	-0.210944	-0.358605	-0.080538	-0.230667	-0.15952
L1M8	L1	LINE	-0.672183	-0.526912	-0.351052	-0.305513	-0.327719	-0.12368	0.130363	-0.342807	-1.14286	-0.383005	-0.272017	0.0512343	-1.05016	-0.0570304	0.179562	-0.278194	-0.436089	-0.107452	-0.242274	-0.115833
L1MA1	L1	LINE	-0.560676	-1.16196	0.019954	-0.330609	-0.183255	-0.493392	0.162674	-0.412352	-0.873029	-0.323941	0.291321	0.0893467	-1.03799	0.146309	-0.0445794	-0.164932	-0.595723	-0.0768221	-0.189722	-0.064474
L1MA10	L1	LINE	-0.658489	-0.930809	-0.224095	-0.308794	-0.291843	-0.431818	0.0840292	-0.387704	-0.951024	-0.307829	-0.0655394	0.0481114	-0.914637	-0.142126	0.123462	-0.160676	-0.640271	-0.0393505	-0.201308	-0.0727304
L1MA2	L1	LINE	-0.572368	-1.17433	-0.00811142	-0.292031	-0.186653	-0.439982	0.172728	-0.391686	-0.877899	-0.36429	0.265691	0.0616983	-1.02056	0.19431	-0.0327106	-0.18393	-0.594087	-0.0696289	-0.223468	-0.0933124
L1MA3	L1	LINE	-0.632161	-1.08431	-0.0526584	-0.336472	-0.213722	-0.447082	0.153469	-0.431494	-0.846731	-0.346886	0.296534	0.0792929	-1.05665	0.271838	-0.0264826	-0.178546	-0.605911	-0.141233	-0.246288	-0.130364
L1MA4	L1	LINE	-0.703684	-1.02695	-0.183722	-0.378841	-0.240192	-0.417639	0.148711	-0.390908	-0.851676	-0.274941	0.190553	0.0809445	-0.916153	0.260728	0.0437912	-0.181089	-0.550995	-0.160542	-0.261235	-0.133721
L1MA4A	L1	LINE	-0.612023	-1.08335	-0.0136822	-0.367018	-0.237203	-0.418817	0.164359	-0.298073	-0.790604	-0.346981	0.331688	0.0497801	-1.05972	0.310606	-0.0625937	-0.161773	-0.57323	-0.126498	-0.258323	-0.134233
L1MA5	L1	LINE	-0.673939	-0.99979	-0.126199	-0.389877	-0.224157	-0.439995	0.185782	-0.378105	-0.879478	-0.313265	0.245735	0.0718297	-0.87924	0.301762	0.0235195	-0.189661	-0.579502	-0.131033	-0.269538	-0.154246
L1MA5A	L1	LINE	-0.715367	-0.922209	-0.145088	-0.357614	-0.313012	-0.431361	0.156531	-0.322875	-0.900974	-0.279082	0.208359	0.0954469	-0.970615	0.273266	-0.025269	-0.114515	-0.452707	-0.154007	-0.234189	-0.0955983
L1MA6	L1	LINE	-0.630286	-0.884975	-0.0923195	-0.486403	-0.17555	-0.458957	0.230281	-0.384366	-0.864807	-0.334648	0.192989	0.05631	-0.875063	0.135937	0.0136278	-0.18468	-0.598601	-0.0879261	-0.289137	-0.160347
L1MA7	L1	LINE	-0.709477	-0.95634	-0.16192	-0.393942	-0.307141	-0.43288	0.163134	-0.413644	-0.930786	-0.274857	0.0928079	0.101323	-0.952632	0.0918762	0.0129488	-0.136354	-0.516747	-0.0898415	-0.233849	-0.0970238
L1MA8	L1	LINE	-0.72126	-0.915906	-0.194268	-0.424678	-0.291786	-0.448423	0.158673	-0.428739	-0.939029	-0.278279	0.0791396	0.0680151	-0.948533	0.0799178	0.0440379	-0.179568	-0.56848	-0.134958	-0.266907	-0.104367
L1MA9	L1	LINE	-0.674757	-0.938735	-0.127624	-0.402363	-0.238311	-0.489054	0.173209	-0.336831	-0.888418	-0.303286	0.127211	0.0815549	-0.924372	0.0928076	0.0541551	-0.182541	-0.591486	-0.0809928	-0.235117	-0.103359
L1MB1	L1	LINE	-0.657818	-0.879029	-0.154174	-0.372019	-0.248707	-0.429372	0.148785	-0.460627	-0.877468	-0.294957	0.157704	0.0668388	-0.989604	0.080604	0.0521656	-0.141793	-0.551553	-0.116685	-0.24383	-0.10092
L1MB2	L1	LINE	-0.608948	-0.733248	-0.194813	-0.232457	-0.199158	-0.35803	0.191315	-0.280366	-0.898184	-0.359991	0.113092	0.0201338	-0.933722	0.334139	0.0506532	-0.154308	-0.318552	-0.144583	-0.0990704	0.040975
L1MB3	L1	LINE	-0.547448	-0.652525	-0.221172	-0.0438971	-0.26308	-0.302963	0.0596769	-0.18877	-0.794134	-0.306012	0.0602881	0.00619911	-0.925014	0.212199	0.0772566	-0.167715	-0.258262	-0.0915939	-0.108242	-0.00111097
L1MB4	L1	LINE	-0.6109	-0.713267	-0.266138	-0.0970673	-0.247522	-0.308306	0.139154	-0.153247	-0.890223	-0.375878	0.0222254	0.0429687	-0.918428	0.243286	0.17554	-0.149322	-0.343378	-0.107518	-0.124061	-0.0181486
L1MB5	L1	LINE	-0.518526	-0.487268	-0.188995	-0.0281352	-0.261307	-0.254956	0.0971224	-0.185253	-0.844032	-0.376946	0.0378224	-0.00522813	-0.975084	0.232182	0.0720851	-0.195889	-0.288728	-0.124215	-0.0988563	0.00493645
L1MB7	L1	LINE	-0.610584	-0.326064	-0.26988	-0.227309	-0.260368	-0.281004	0.114897	-0.308438	-0.882416	-0.351715	0.0103993	0.0044349	-0.913805	0.265814	0.0496833	-0.1528	-0.295039	-0.168441	-0.104709	-0.00260794
L1MB8	L1	LINE	-0.617386	-0.49137	-0.272301	-0.24702	-0.274483	-0.266705	0.0969141	-0.334553	-0.843698	-0.34303	-0.0147353	0.0205243	-0.515993	0.166158	0.057024	-0.147873	-0.339371	-0.142233	-0.0867045	0.023386
L1MC	L1	LINE	-0.826468	-0.841846	-0.424863	-0.348521	-0.349298	-0.37692	0.115371	-0.372373	-1.12034	-0.263035	-0.267983	0.0795496	-0.743535	0.0508994	0.281237	-0.0891757	-0.487466	-0.178182	-0.296066	-0.194387
L1MC1	L1	LINE	-0.643365	-0.887622	-0.20898	-0.131564	-0.281019	-0.321392	0.0743606	-0.32969	-0.794255	-0.355222	0.0884188	-0.00131049	-1.11688	0.140186	0.0333932	-0.195083	-0.442857	-0.136407	-0.135152	-0.0209044
L1MC2	L1	LINE	-0.722837	-0.79645	-0.310555	-0.174447	-0.283123	-0.273791	0.06861	-0.218614	-0.890692	-0.31734	-0.05855	0.0315995	-0.942887	0.0922974	0.180485	-0.217109	-0.48371	-0.135449	-0.125393	-0.00623668
L1MC3	L1	LINE	-0.646934	-0.686892	-0.241033	-0.197283	-0.339652	-0.338479	0.0667196	-0.289624	-0.851359	-0.30124	-0.127484	0.0169701	-0.950111	-0.0557219	0.116485	-0.190645	-0.492164	-0.0298003	-0.133695	-0.0360913
L1MC4	L1	LINE	-0.646307	-0.427613	-0.439733	-0.167414	-0.340673	-0.168471	0.00435525	-0.289985	-0.857312	-0.290404	-0.366351	0.0116908	-0.828698	-0.0199534	0.091801	-0.173736	-0.232178	-0.184563	-0.154609	-0.066169
L1MC4a	L1	LINE	-0.685567	-0.366723	-0.395576	-0.21767	-0.334286	-0.216145	0.0332052	-0.274022	-0.901501	-0.317459	-0.271867	0.00567961	-0.917791	-0.0015897	0.138764	-0.146011	-0.30875	-0.20015	-0.155645	-0.0531499
L1MC5	L1	LINE	-0.625354	-0.249209	-0.501059	-0.182937	-0.380335	-0.131458	-0.0403321	-0.310833	-0.949138	-0.244156	-0.482191	0.0266281	-0.706994	-0.0538576	0.151789	-0.134051	-0.202343	-0.209999	-0.0821398	0.000682762
L1MC5a	L1	LINE	-0.641139	-0.288874	-0.508394	-0.205892	-0.343902	-0.138643	-0.0341437	-0.294466	-0.851963	-0.20335	-0.458747	-0.00459932	-0.647689	-0.0709601	0.133729	-0.123245	-0.15528	-0.182777	-0.0969405	-0.0334936
L1MCa	L1	LINE	-0.691398	-0.6105	-0.250872	-0.29626	-0.296279	-0.239731	0.114369	-0.405601	-0.957097	-0.345373	-0.0280652	0.00680491	-0.948676	0.117836	0.217063	-0.203805	-0.598017	-0.12721	-0.165074	-0.109588
L1MCb	L1	LINE	-0.554454	-1.01317	-0.104138	-0.247274	-0.269117	-0.167704	0.0529558	-0.583123	-0.82481	-0.339047	0.00551217	-0.0433184	-1.02976	-0.0352973	0.211225	-0.222941	-0.596072	-0.0568985	-0.0993959	-0.0281446
L1MCc	L1	LINE	-0.481455	-0.563125	-0.0173218	-0.222693	-0.196829	-0.0580603	0.126662	-0.339125	-0.785288	-0.410088	0.0855967	-0.0049212	-1.19246	0.0812223	0.0793436	-0.232963	-0.446731	-0.0531769	-0.211844	-0.201208
L1MD	L1	LINE	-0.898229	-0.774638	-0.487636	-0.331206	-0.365576	-0.333959	0.109864	-0.328798	-1.11143	-0.324216	-0.36301	0.0576868	-0.716459	0.0618332	0.364809	-0.118672	-0.381142	-0.13564	-0.28984	-0.125219
L1MD1	L1	LINE	-0.704874	-0.842748	-0.255242	-0.18849	-0.291199	-0.293558	0.119856	-0.310596	-0.935459	-0.36343	-0.0320298	0.0293352	-0.940842	0.154324	0.165895	-0.108672	-0.474492	-0.151163	-0.185297	-0.079553
L1MD2	L1	LINE	-0.643336	-0.58643	-0.283862	-0.162756	-0.29099	-0.276231	0.0632831	-0.228579	-0.846204	-0.306266	-0.0768985	0.00853724	-0.96857	0.0418507	0.132622	-0.172648	-0.375428	-0.0990781	-0.120721	-0.030551
L1MD3	L1	LINE	-0.637398	-0.518937	-0.346548	-0.168071	-0.385281	-0.259207	-0.010804	-0.363783	-0.911905	-0.249589	-0.24456	0.0110965	-1.03425	-0.0506407	0.0828933	-0.21812	-0.367113	-0.106756	-0.149762	-0.0358354
L1MDa	L1	LINE	-0.633014	-0.780726	-0.189446	-0.19761	-0.248645	-0.246565	0.122948	-0.260324	-0.833052	-0.378403	-0.00942062	0.0190347	-0.826141	0.198704	0.209948	-0.128904	-0.434271	-0.100754	-0.170748	-0.101525
L1MDb	L1	LINE	-0.454625	-0.800909	-0.111247	-0.367689	-0.109448	-0.131457	0.0629484	-0.421685	-0.558828	-0.328008	-0.0755198	-0.0359662	-0.239496	-0.000305669	0.0539048	-0.033046	-0.431818	-0.0382361	-0.143425	-0.0889246
L1ME1	L1	LINE	-0.745813	-0.616661	-0.342387	-0.307992	-0.296809	-0.301501	0.120926	-0.368352	-0.984105	-0.352864	-0.126857	0.0235741	-0.883291	0.114539	0.0946268	-0.171725	-0.436278	-0.197901	-0.205435	-0.0996068
L1ME2	L1	LINE	-0.767849	-0.568709	-0.380896	-0.352212	-0.32547	-0.315856	0.113735	-0.431457	-1.03792	-0.314443	-0.218125	0.0401018	-0.824551	-0.0085695	0.152703	-0.181726	-0.416204	-0.176889	-0.228466	-0.133468
L1ME2z	L1	LINE	-0.690724	-0.386888	-0.475455	-0.30051	-0.30346	-0.245134	0.0716174	-0.347091	-0.898157	-0.288697	-0.299536	0.0152421	-0.735293	-0.0401691	0.120663	-0.157048	-0.380165	-0.174454	-0.147634	-0.0560168
L1ME3	L1	LINE	-0.693582	-0.619635	-0.3384	-0.22032	-0.364807	-0.312444	0.0555304	-0.313391	-0.941196	-0.299862	-0.224735	0.0169494	-0.867822	0.0307509	0.122683	-0.162276	-0.39812	-0.139305	-0.173805	-0.101059
L1ME3A	L1	LINE	-0.706935	-0.634201	-0.350668	-0.241743	-0.333065	-0.269231	0.0683041	-0.322257	-0.901998	-0.261277	-0.247058	0.0288374	-0.936755	-0.0342448	0.0909359	-0.154499	-0.338138	-0.144794	-0.187454	-0.0851716
L1ME3B	L1	LINE	-0.706038	-0.59273	-0.386117	-0.302206	-0.337798	-0.258785	0.0840496	-0.352991	-0.968706	-0.278251	-0.29517	0.00527571	-0.795541	0.0460202	0.0854633	-0.142329	-0.348206	-0.190735	-0.167766	-0.0913382
L1ME3C	L1	LINE	-0.698443	-0.432997	-0.495596	-0.365072	-0.414522	-0.284424	0.0350297	-0.382083	-0.976645	-0.300384	-0.468208	0.0300632	-0.61911	-0.226561	0.195639	-0.0362862	-0.261481	-0.124734	-0.184696	-0.046625
L1ME3Cz	L1	LINE	-0.813745	-0.636835	-0.522689	-0.268755	-0.430544	-0.302819	0.0155827	-0.348425	-0.958319	-0.203946	-0.43697	0.0750486	-0.639646	-0.15244	0.246027	-0.143043	-0.283412	-0.126269	-0.192483	-0.108737
L1ME3D	L1	LINE	-0.798395	-0.663281	-0.486926	-0.326429	-0.403031	-0.320688	0.0545116	-0.381505	-1.03152	-0.355313	-0.430992	0.0620902	-0.676226	-0.0628168	0.208339	-0.168647	-0.406825	-0.0615901	-0.254324	-0.110166
L1ME3E	L1	LINE	-0.790126	-0.573182	-0.50713	-0.231189	-0.370735	-0.268449	0.0419243	-0.338364	-0.982257	-0.261058	-0.396669	0.0393402	-0.685116	-0.00621915	0.188568	-0.140113	-0.357193	-0.137095	-0.19457	-0.105409
L1ME3F	L1	LINE	-0.838512	-0.653754	-0.491424	-0.334034	-0.381875	-0.296473	0.0537345	-0.321504	-1.08005	-0.199782	-0.361361	0.0863896	-0.765236	-0.0686249	0.136481	-0.121666	-0.413146	-0.179599	-0.231541	-0.13097
L1ME3G	L1	LINE	-0.69582	-0.436056	-0.543666	-0.208279	-0.354585	-0.254928	-0.00432688	-0.310156	-0.868611	-0.209278	-0.493908	0.0246769	-0.541234	-0.213025	0.231142	-0.10741	-0.215805	-0.110735	-0.169916	-0.0810524
L1ME4a	L1	LINE	-0.883384	-0.226648	-0.7123	-0.325374	-0.477504	-0.27819	-0.00228341	-0.28477	-1.11407	-0.165535	-0.734876	0.0425472	-0.576931	-0.383902	0.347932	-0.0925211	-0.177449	-0.179257	-0.164435	-0.0782172
L1ME4b	L1	LINE	-0.628153	-0.366422	-0.552857	-0.107681	-0.360662	-0.200391	-0.0390604	-0.224087	-0.828743	-0.205926	-0.524355	-0.00446992	-0.574961	-0.208391	0.186646	-0.10761	-0.102235	-0.13639	-0.094101	-0.0160494
L1ME4c	L1	LINE	-0.714204	-0.217239	-0.655085	-0.2659	-0.384137	-0.219229	-0.0219538	-0.277322	-0.944277	-0.0937728	-0.641766	0.0496944	-0.573691	-0.319842	0.228571	-0.0617743	-0.0797067	-0.153638	-0.154034	-0.064609
L1ME5	L1	LINE	-0.544806	-0.530665	-0.306258	0.0889095	-0.337602	-0.282039	-0.0314694	-0.104511	-0.644333	-0.277054	-0.200264	0.0526182	-0.849951	-0.156573	0.28281	-0.181515	-0.334878	0.116996	-0.128502	-0.0368589
L1MEa	L1	LINE	-0.585416	-0.458239	-0.340166	-0.0312873	-0.383896	-0.143766	-0.0344924	-0.433571	-1.07293	-0.384968	-0.273399	0.0148131	-0.92176	0.121336	0.280581	-0.193885	-0.437765	0.160672	-0.196255	-0.207146
L1MEb	L1	LINE	-0.589506	-0.300473	-0.213808	-0.189688	-0.317869	-0.0718087	0.0231476	-0.427212	-1.00905	-0.399834	-0.0968269	0.0174077	-0.908244	0.134161	0.158536	-0.138462	-0.40847	-0.0841082	-0.0919518	-0.0773711
L1MEc	L1	LINE	-0.705645	-0.714808	-0.264718	-0.258246	-0.282217	-0.180771	0.151689	-0.327471	-1.03557	-0.372955	-0.0614434	0.0319128	-0.894141	0.181158	0.211621	-0.168046	-0.482449	-0.148296	-0.235078	-0.18691
L1MEd	L1	LINE	-0.815148	-0.621375	-0.421444	-0.272671	-0.399848	-0.259642	0.0882258	-0.404368	-1.13913	-0.297919	-0.294548	0.0417467	-0.821923	0.0832295	0.288246	-0.127793	-0.386363	-0.140826	-0.229795	-0.157937
L1MEf	L1	LINE	-0.786349	-0.7581	-0.301722	-0.368252	-0.306113	-0.278359	0.168634	-0.455103	-1.11774	-0.317039	-0.153452	0.0220574	-0.824255	0.180729	0.260556	-0.108588	-0.454757	-0.158925	-0.267744	-0.177392
L1MEg	L1	LINE	-0.788435	-0.742122	-0.297905	-0.343321	-0.357738	-0.264861	0.153374	-0.409608	-1.14491	-0.359587	-0.162465	0.0592437	-0.85982	0.155313	0.245052	-0.133835	-0.454106	-0.167379	-0.254655	-0.165398
L1MEg1	L1	LINE	-0.532182	-0.433374	-0.230113	-0.137957	-0.339618	0.125814	-0.0403084	-0.524481	-0.840937	-0.396628	-0.178441	-0.0720188	-0.708574	-0.0199302	0.121904	-0.248501	-0.550114	-0.223236	-0.0959921	-0.142203
L1MEg2	L1	LINE	-0.559617	-0.725276	-0.122422	-0.189445	-0.168949	0.0740028	0.0348115	-0.419633	-0.98665	-0.404017	0.0349022	0.0491315	-1.09242	-0.0260068	0.00337453	-0.224538	-0.379333	0.0270043	-0.0779422	-0.0618022
L1MEh	L1	LINE	-0.678914	-0.680046	-0.270156	-0.0338865	-0.358796	-0.191686	-0.00733114	-0.29657	-1.06901	-0.385109	-0.291894	-0.0229336	-1.04225	-0.0649934	0.413908	-0.220946	-0.494951	0.00903923	-0.226529	-0.120811
L1MEi	L1	LINE	-0.731982	-0.472589	-0.389342	-0.239275	-0.387043	-0.171393	0.0640196	-0.395259	-1.12382	-0.309166	-0.319183	-0.00683174	-0.905767	-0.0128776	0.304003	-0.140713	-0.345772	-0.152507	-0.236244	-0.18428
L1MEj	L1	LINE	-0.698917	-0.765028	-0.41776	-0.158447	-0.372804	-0.0383512	-0.0381313	-0.395776	-0.924043	-0.323046	-0.313085	-0.0109391	-0.951637	-0.078691	0.265484	-0.215789	-0.318533	-0.107515	-0.236041	-0.186273
L1P	L1	LINE	-0.354245	-1.15774	-0.321372	-0.077684	-0.372964	-0.378999	-0.00132776	-0.212361	-1.22184	-0.389995	0.149767	-0.0804664	-1.40961	-0.107397	-0.0357125	-0.118989	-0.357452	0.452495	-0.0624921	-0.0536493
L1P1	L1	LINE	-0.179559	-1.56482	0.417739	0.0507472	0.0995928	-0.50091	0.469627	-0.207937	-0.532574	-0.467853	0.869545	0.0615619	-1.08026	0.801201	-0.0194875	-0.271488	-0.745922	0.0378633	0.0329024	0.143616
L1P2	L1	LINE	-0.258656	-1.5337	0.352239	0.159247	-0.0201662	-0.371745	0.290122	-0.225395	-0.467591	-0.514972	0.802749	0.0128805	-1.12921	0.695105	0.0679706	-0.28983	-0.685556	0.0788659	-0.0195484	0.0885244
L1P3	L1	LINE	-0.277432	-1.31491	0.249483	0.092524	-0.0640245	-0.299607	0.227126	-0.258722	-0.599891	-0.461755	0.663179	0.0553868	-1.19121	0.497182	0.114641	-0.25659	-0.663354	0.147875	-0.00777975	0.0716422
L1P3b	L1	LINE	-0.155386	-0.839548	1.1738	0.0405527	-0.0217139	0.166273	0.082379	-0.535437	-0.551173	-0.956564	0.988227	-0.179256	-1.81013	0.270586	-0.382542	-0.942631	-0.30648	0.152529	-0.06799	-0.249684
L1P4	L1	LINE	-0.495861	-0.80112	-0.158191	-0.241959	-0.150665	-0.367229	0.226761	-0.381232	-0.926709	-0.359512	0.214999	0.0682221	-0.989517	0.169588	0.199881	-0.206543	-0.557078	0.0524388	-0.14115	0.000886707
L1P4a	L1	LINE	-0.327356	-0.923057	0.227965	-0.186695	-0.116367	-0.314131	0.124314	-0.514457	-0.534984	-0.51572	0.381458	-0.0999877	-0.876527	0.123913	-0.162421	-0.20468	-0.582649	0.0391025	-0.0558116	-0.0343374
L1P4b	L1	LINE	-0.0599502	-0.851481	0.7111	-0.29343	-0.187002	-0.261383	0.290441	-0.514716	-0.321774	-0.675273	0.607825	-0.190181	-1.58851	-0.222176	-0.146566	-0.455154	-0.508671	0.546078	-0.0959204	-0.0694061
L1P4c	L1	LINE	-0.467183	-0.702735	1.04714	-0.19095	-0.403844	-0.0421619	-0.309686	-0.125907	0.0278691	-0.907625	1.06448	-0.0658708	-2.3031	0.259441	0.0428953	-1.92877	-1.47781	-0.0475047	0.0498234	-0.161225
L1P4d	L1	LINE	-0.207158	-1.00097	0.542182	0.234361	-0.157549	-0.15387	0.0996488	-0.474509	-0.599084	-0.900413	0.429401	-0.313258	-1.4981	-0.109332	-0.302847	-0.126921	-0.581417	0.315342	-0.00938219	0.084511
L1P4e	L1	LINE	-0.372877	-1.58444	0.541202	-0.130523	-0.403558	-0.378227	0.107798	-0.387893	-0.47671	-0.592433	0.524083	-0.241155	-1.38518	0.159674	-0.185238	-0.530552	-1.02988	0.215134	-0.116271	-0.0816902
L1P5	L1	LINE	-0.499213	-0.858078	-0.0331465	-0.148335	-0.259254	-0.313284	0.196001	-0.274479	-0.882991	-0.197076	0.227921	0.183024	-1.04576	0.141493	-0.0655633	-0.272105	-0.451479	0.11305	-0.188903	-0.0267022
L1PA10	L1	LINE	-0.311024	-1.26184	0.318668	-0.00881132	-0.129298	-0.400525	0.232567	-0.312237	-0.57851	-0.391681	0.673684	0.0548037	-1.26081	0.450817	-0.201533	-0.251828	-0.664679	0.0922285	-0.0680416	0.0336185
L1PA11	L1	LINE	-0.320055	-0.991211	0.2444	-0.069278	-0.116696	-0.417683	0.214718	-0.385012	-0.611362	-0.372653	0.644508	0.0554023	-1.30342	0.470824	-0.235	-0.214576	-0.626144	0.027934	-0.0956582	0.0272241
L1PA12	L1	LINE	-0.331627	-1.22225	0.31307	-0.0729109	-0.148035	-0.451197	0.192857	-0.385871	-0.611266	-0.447264	0.584598	0.00149076	-1.33033	0.281848	-0.133785	-0.256768	-0.633093	0.212399	-0.0758647	0.0123983
L1PA13	L1	LINE	-0.383859	-1.12178	0.197545	-0.101966	-0.152215	-0.442824	0.182051	-0.373469	-0.648158	-0.360224	0.525391	0.0302038	-1.2347	0.350551	-0.135272	-0.219308	-0.616653	0.0979004	-0.0567479	0.0396271
L1PA14	L1	LINE	-0.353984	-1.25307	0.185637	-0.0515676	-0.152219	-0.422698	0.204645	-0.326279	-0.637248	-0.343989	0.567724	0.0717683	-1.20639	0.4247	-0.13246	-0.178803	-0.565706	0.0919718	-0.0615553	0.0452604
L1PA15	L1	LINE	-0.380677	-0.98955	0.120157	-0.175441	-0.141665	-0.418902	0.191861	-0.418347	-0.672801	-0.393462	0.494296	-0.000523322	-1.11845	0.317684	-0.100611	-0.216897	-0.642043	-0.021688	-0.0872604	0.0281808
L1PA15-16	L1	LINE	-0.403249	-1.24589	0.346647	-0.137341	-0.173786	-0.409007	0.173165	-0.464898	-0.739866	-0.543614	0.487797	-0.0923241	-1.09557	0.204877	-0.0736276	-0.219572	-0.669065	0.0778175	-0.202454	-0.130418
L1PA16	L1	LINE	-0.399357	-0.745079	0.0738849	-0.185585	-0.135824	-0.408165	0.179283	-0.365356	-0.649712	-0.345141	0.433539	0.0438357	-0.990463	0.298161	-0.162052	-0.207307	-0.601801	0.00134058	-0.115875	0.0222947
L1PA17	L1	LINE	-0.443594	-0.871355	0.000931199	-0.113951	-0.190792	-0.398454	0.158078	-0.293757	-0.738387	-0.316187	0.363224	0.0334111	-1.06419	0.259491	-0.101518	-0.164841	-0.535463	0.0394273	-0.135037	-0.0228497
L1PA2	L1	LINE	-0.121665	-1.61814	0.532374	-0.0857681	0.288436	-0.39185	0.540971	-0.252338	-0.488176	-0.417223	0.964592	0.0895828	-0.840701	0.808085	-0.320292	-0.240787	-0.753757	-0.0177507	0.0735333	0.151498
L1PA3	L1	LINE	-0.151396	-1.57782	0.505786	-0.0911445	0.129808	-0.517504	0.523694	-0.253498	-0.525572	-0.405073	0.951828	0.109928	-1.11513	0.793089	-0.328543	-0.267903	-0.76341	-0.0315559	0.0298488	0.138112
L1PA4	L1	LINE	-0.17845	-1.5382	0.486804	-0.0484695	0.0285218	-0.585547	0.4805	-0.232469	-0.535327	-0.403957	0.9238	0.111617	-1.28603	0.777236	-0.294765	-0.265451	-0.738924	0.0123046	-0.00645219	0.126037
L1PA5	L1	LINE	-0.20757	-1.5087	0.453295	-0.023913	-0.0150958	-0.547325	0.430462	-0.21768	-0.54661	-0.392525	0.894361	0.114013	-1.32329	0.7688	-0.249286	-0.277298	-0.705132	0.00268956	-0.0241343	0.0993845
L1PA6	L1	LINE	-0.245955	-1.47167	0.363128	0.0522801	-0.0419128	-0.4677	0.338287	-0.178106	-0.533572	-0.422682	0.837141	0.0932016	-1.25154	0.680906	-0.140267	-0.284577	-0.692107	0.00119019	-0.036013	0.0656802
L1PA7	L1	LINE	-0.273563	-1.40209	0.322936	0.0110539	-0.0752198	-0.437595	0.301898	-0.270906	-0.574929	-0.395901	0.779087	0.0996756	-1.28925	0.594147	-0.147564	-0.27032	-0.672753	0.0410723	-0.0306035	0.0725881
L1PA8	L1	LINE	-0.279595	-1.32846	0.314413	-0.0204603	-0.135542	-0.435517	0.261793	-0.261134	-0.584533	-0.363061	0.708976	0.103166	-1.26473	0.51947	-0.222574	-0.252708	-0.6361	0.0852664	-0.0508535	0.055545
L1PA8A	L1	LINE	-0.290858	-1.35366	0.279852	-0.0198789	-0.082735	-0.350389	0.244396	-0.349469	-0.594371	-0.432776	0.71124	0.0596421	-1.29297	0.493594	-0.164245	-0.266511	-0.71778	-0.00815172	-0.0403114	0.0380231
L1PB	L1	LINE	-0.472626	-1.27554	-0.129613	-0.0580172	-0.110223	-0.394623	0.25843	-0.193326	-0.85092	-0.388475	0.342713	0.0860768	-0.91822	0.250861	0.350306	-0.186433	-0.674782	-0.0185893	-0.111797	0.0372275
L1PB1	L1	LINE	-0.418679	-1.21522	0.0543028	-0.023065	-0.142327	-0.359789	0.22094	-0.308201	-0.751441	-0.377468	0.477747	0.0880082	-1.14908	0.387634	0.0320673	-0.215946	-0.620441	-0.0560718	-0.0671762	0.0422779
L1PB2	L1	LINE	-0.461277	-1.25868	0.0376036	-0.101409	-0.179535	-0.416283	0.168472	-0.382771	-0.836869	-0.361075	0.348784	0.0822241	-1.1294	0.323397	0.0367592	-0.253929	-0.61288	-0.093082	-0.118381	0.00961137
L1PB3	L1	LINE	-0.521746	-1.14169	-0.0638483	-0.210066	-0.192168	-0.424441	0.140581	-0.36326	-0.811067	-0.371922	0.271622	0.0519654	-0.914755	0.249002	0.0417323	-0.234578	-0.5765	-0.0165335	-0.168235	-0.0630078
L1PB4	L1	LINE	-0.562003	-0.867893	-0.0854914	-0.334874	-0.195874	-0.440066	0.144415	-0.383893	-0.794967	-0.235367	0.213021	0.0493492	-0.96492	0.171383	-0.0648138	-0.167211	-0.600749	-0.0662252	-0.199415	-0.078842
L1PBa	L1	LINE	-0.41498	-1.11351	0.174898	0.0317781	-0.100846	-0.24693	0.195087	-0.116804	-0.682586	-0.514639	0.465254	-2.11744e-05	-1.11506	0.302306	0.125656	-0.231789	-0.570282	0.101258	-0.105829	-0.0304147
L1PBa1	L1	LINE	-0.361208	-0.910896	0.242108	0.00830257	-0.0612371	-0.101966	0.206521	-0.290367	-0.629125	-0.535575	0.5586	-0.0406188	-1.28551	0.332759	0.109092	-0.245584	-0.58929	0.118193	-0.0398589	0.0169162
L1PBb	L1	LINE	-0.413277	-1.0452	0.241595	-0.0613785	-0.320476	-0.257949	-0.0512702	-0.558362	-0.684979	-0.642123	0.152997	-0.0997562	-1.30586	0.0379025	-0.047968	-0.122033	-0.56854	0.023966	-0.265991	-0.208161
L1PREC2	L1	LINE	-0.373142	-1.09211	0.167465	-0.0946663	-0.145324	-0.446116	0.212695	-0.285213	-0.671492	-0.404257	0.511126	0.0426141	-1.19233	0.387205	-0.107987	-0.21797	-0.622145	0.0909993	-0.0831574	0.0285366
L2	L2	LINE	-0.203163	-0.23888	-0.169475	0.148226	-0.204758	0.0649659	-0.181177	-0.113172	-0.245145	-0.231809	-0.114964	-0.0950425	-0.639886	-0.0912285	0.0793385	-0.164562	-0.0875066	0.0454433	-0.109011	-0.0870713
L2-1_AMi	L2	LINE	-0.0133575	-0.378485	-0.330084	0.504855	-0.303053	-0.080717	-0.23911	0.31379	-0.356933	-0.617781	-0.207418	-0.187508	-0.835451	-0.093669	0.188437	-0.237589	0.0251813	0.0891434	-0.138808	-0.054161
L2-1_Crp	L2	LINE	-0.720516	-1.01276	-0.461322	0.0875126	-0.151105	-0.117499	-0.426893	-0.565021	-0.145787	-0.321588	0.141382	-0.181666	-0.617169	-0.473193	-0.0162262	-0.704051	-1.29241	0.679169	0.436788	0.376749
L2-3_AMi	L2	LINE	-0.376376	-1.39749	-1.18135	0.719638	-1.10256	-0.215104	-0.14827	-1.71298	0.553804	1.27663	-2.98793	0.283685	-1.91241	-1.89622	-0.772545	0.80184	1.09475	0.410263	0.0541558	-1.78033
L2-3_Crp	L2	LINE	-0.27122	-0.22288	-0.335088	0.377591	-0.347555	0.0531728	-0.234433	-0.048664	-0.425032	-0.432562	-0.128544	-0.097786	-1.095	-0.0377571	0.156253	-0.191237	-0.10963	-0.0597633	-0.211138	-0.159124
L2a	L2	LINE	-0.223888	-0.155024	-0.143953	0.186041	-0.25482	0.0187923	-0.216356	-0.0947862	-0.30143	-0.220075	-0.160383	-0.0942611	-0.778109	-0.148381	0.0354047	-0.195086	-0.00986221	0.056168	-0.145708	-0.117187
L2b	L2	LINE	-0.0775918	0.045922	-0.0895779	0.345012	-0.207941	0.111088	-0.303311	0.0846164	-0.0391764	-0.108945	-0.129752	-0.0948554	-0.666976	-0.192535	0.0910698	-0.145553	0.148565	0.122818	-0.181125	-0.182637
L2c	L2	LINE	-0.166523	-0.0322232	-0.188524	0.22492	-0.202109	0.067685	-0.237165	-0.0592217	-0.171005	-0.130208	-0.190376	-0.0794036	-0.707033	-0.183116	0.0460768	-0.172604	0.0645254	0.0664401	-0.180523	-0.169689
L3	CR1	LINE	-0.333834	0.0614846	-0.352012	0.138795	-0.295564	-0.00403813	-0.207194	-0.138423	-0.425181	-0.130693	-0.352403	-0.0946068	-0.850252	-0.267423	0.119749	-0.199296	0.00497354	-0.0470386	-0.149573	-0.119319
L3b	CR1	LINE	-0.239911	0.330741	-0.450611	0.191783	-0.245819	0.108153	-0.226102	-0.0187524	-0.181783	0.0930933	-0.42686	-0.0368085	-0.535946	-0.36082	0.24306	-0.14143	0.151394	-0.0488443	-0.109448	-0.158699
L4_A_Mam	RTE-X	LINE	-0.469685	0.00324538	-0.396514	0.0269691	-0.319428	-0.0499753	-0.160203	-0.344405	-0.691846	-0.244738	-0.374734	-0.0741198	-0.979769	-0.25601	0.0388604	-0.170224	-0.0559857	-0.0545958	-0.0653965	-0.0329864
L4_B_Mam	RTE-X	LINE	-0.41473	0.0693422	-0.452168	0.0472933	-0.315961	-0.112006	-0.136791	-0.278034	-0.699576	-0.087009	-0.461146	-0.106867	-1.05035	-0.219547	0.0961394	-0.137809	0.00165827	-0.0163097	-0.156415	-0.0239734
L4_C_Mam	RTE-X	LINE	-0.506112	0.0124332	-0.463261	0.00584481	-0.319859	-0.0401177	-0.138208	-0.378137	-0.618998	-0.106806	-0.391623	-0.0670431	-0.865956	-0.301814	0.109254	-0.143577	-0.0341286	-0.0943997	-0.07754	-0.0528736
L5	RTE-X	LINE	-0.540054	0.105152	-0.464303	0.0718872	-0.412294	-0.0953321	-0.124887	-0.370984	-0.889557	-0.282846	-0.683514	-0.162858	-0.949266	-0.432764	0.424953	-0.197129	-0.0181413	-0.0318187	0.0596839	0.0381167
LFSINE_Vert	tRNA	SINE	0.0386651	0.445774	-0.243826	-0.0431117	-0.118424	0.24853	-0.362491	-0.310834	0.266379	0.444133	-0.322176	-0.0508102	-0.530672	-0.495534	-0.22373	-0.0482464	0.271314	0.115285	-0.15897	-0.23016
LOR1-int	ERV1	LTR	-0.592675	-1.03795	0.0707322	-0.278507	-0.154262	-0.377187	0.3703	-0.248369	-1.05491	-0.496862	-0.0373658	0.0265248	-1.08972	0.200471	0.267537	-0.185568	-0.634056	-0.161632	-0.058347	-0.0149231
LOR1a	ERV1	LTR	-0.0488718	-0.970947	0.732347	0.0999208	-0.0272988	-0.128395	0.331901	-0.111883	-0.462688	-0.553723	0.518138	0.00138997	-1.35693	0.581736	0.132623	-0.432187	-0.38966	0.175345	-0.138756	-0.00467744
LOR1b	ERV1	LTR	-0.103308	-0.363335	0.434526	0.18951	-0.129511	-0.0497853	0.113024	-0.231179	-0.415453	-0.237878	0.313734	-0.0765956	-0.975879	0.401179	0.0878708	-0.252421	-0.282623	0.198815	-0.147199	-0.0425789
LTR06	ERV1	LTR	-0.27777	-1.1176	-0.00213514	-0.0028161	-0.481974	0.0181245	0.0933311	-0.500255	-0.733443	-0.63856	-0.162239	-0.365116	-1.09615	-0.219641	-0.106995	-0.0905158	-0.138503	-0.164352	-0.17419	-0.108019
LTR1	ERV1	LTR	0.00148869	-1.17051	0.836899	0.16182	0.0264501	0.062694	-0.229704	0.0822287	0.248312	-0.64525	0.709158	-0.0531099	-0.948671	0.195926	-0.131518	-0.542142	-0.143901	0.528492	-0.0380154	-0.112492
LTR101_Mam	ERVL	LTR	-0.297778	-0.104201	-0.114981	0.0696097	-0.264534	0.00167968	-0.109755	-0.374576	-0.494656	-0.249176	-0.147523	-0.153039	-1.43139	-0.377522	0.0753058	-0.333493	-0.381344	0.0509945	-0.151863	-0.173739
LTR102_Mam	ERVL	LTR	-0.436775	-0.750699	-0.0162146	0.228342	-0.27501	-0.0617985	-0.121103	0.1073	-0.237088	-0.333099	0.0153058	-0.0547944	-1.14806	-0.138997	0.0363684	-0.483608	-0.349466	0.104753	-0.224986	-0.232481
LTR103_Mam	ERV1	LTR	-0.119733	-0.136185	-0.189522	0.436426	-0.32762	0.159806	-0.266432	-0.0982676	-0.618822	-0.35036	-0.312257	0.0143309	-1.08539	-0.409307	0.40345	-0.170733	-0.0708974	0.0782574	-0.0573353	-0.111114
LTR103b_Mam	ERV1	LTR	-0.307381	0.0198003	-0.263856	0.612785	-0.337719	0.0903682	-0.376253	-0.181569	-0.632994	-0.427337	-0.329854	-0.0880169	-1.17014	-0.407873	0.520575	-0.279077	-0.138956	0.317855	-0.00427181	0.0369863
LTR104_Mam	Gypsy	LTR	-0.256806	-0.18082	-0.0430394	0.355088	-0.396483	-0.0146853	-0.279043	-0.189368	-0.499608	-0.537547	-0.156301	-0.204698	-1.2564	-0.21016	0.165177	-0.313389	-0.192544	0.117995	-0.120451	-0.112987
LTR105_Mam	ERVL	LTR	-0.35235	-0.783976	0.299444	0.367672	-0.293033	0.00260857	-0.198067	-0.185418	-0.191721	-0.536328	0.252536	-0.164566	-1.42259	-0.302849	-0.00961016	-0.245642	0.174052	0.452862	-0.107191	-0.0338741
LTR106_Mam	LTR	LTR	-0.942838	-0.634259	-0.639254	-0.143375	-0.280008	-0.231313	-0.0309612	-0.171486	-1.14846	-0.543429	-0.693767	-0.0691901	-0.774343	-0.483007	0.5206	-0.185618	-0.186052	-0.02423	-0.176333	-0.232853
LTR107_Mam	LTR	LTR	-0.541957	-0.568106	-0.322532	0.279435	-0.220972	-0.174246	-0.212297	-0.442229	-0.653667	-0.0254586	-0.339144	-0.0492891	-1.1176	-0.464956	0.0742106	-0.357118	-0.243986	0.079208	-0.137056	-0.067803
LTR108a_Mam	ERVL	LTR	-0.308788	-0.885167	0.100667	-0.101029	-0.14456	0.0288674	0.138246	-0.588957	-0.438637	-0.408424	-0.0550453	-0.182207	-1.19783	0.0842912	-0.216845	-0.522352	-0.130973	-0.163811	0.0187971	0.0250441
LTR108b_Mam	ERVL	LTR	-0.507456	-1.4093	0.0162249	-0.272582	-0.60106	0.163095	-0.179496	-0.531609	-0.611024	-0.323929	0.313513	-0.131231	-1.01846	-0.154433	-0.0885601	0.0815828	0.108029	0.262297	0.045408	-0.0953368
LTR108c_Mam	ERVL	LTR	-0.622752	0.0850267	-0.370121	-0.0568351	-0.538716	-0.268914	-0.188659	-0.532469	-0.890239	-0.501033	-0.332277	0.178929	-1.74637	-0.90215	-0.266076	-0.13845	-0.335031	-0.0196042	0.157851	0.274888
LTR108d_Mam	ERVL	LTR	-0.485231	-1.60109	0.296455	-0.14879	0.248237	0.301921	0.260583	-0.232525	0.166055	-0.311605	-0.145875	-0.161183	-1.07328	-0.608205	-0.470776	-0.309347	-0.8173	0.157736	-0.014563	-0.216772
LTR108e_Mam	ERVL	LTR	-0.368246	-0.772196	-0.0727731	0.01115	-0.359244	0.0379126	-0.238081	-0.309198	-0.435542	-0.323261	-0.106526	0.0049221	-1.12363	-0.315217	-0.222488	-0.678835	-0.614724	0.11964	-0.173703	0.0033913
LTR109A2	ERV1	LTR	-0.274886	0.657237	-0.195899	-0.144837	-0.264287	0.218841	-0.067559	-0.370286	-0.684792	-0.240059	-0.00684537	-0.108288	-1.47528	-0.611942	0.354208	-0.149763	-1.18035	-1.07424	0.162671	0.581965
LTR10A	ERV1	LTR	0.615863	0.136956	1.45071	-0.116091	0.217389	0.02565	-0.0151577	-0.0709992	0.265914	-0.0727901	0.157901	-0.0724258	-0.2892	0.868069	-0.127211	-0.0701711	-0.313408	0.112525	-0.108882	0.0813463
LTR10B	ERV1	LTR	0.853127	-0.0720775	1.32116	-0.0446205	0.60865	0.622748	-0.166549	-0.496698	0.403238	-0.100718	0.120161	-0.122616	0.359872	0.96735	-0.525212	0.61291	0.380996	0.616712	0.0275217	0.0775009
LTR10B1	ERV1	LTR	0.814318	-0.392315	1.533	-0.103746	0.730961	1.48769	-0.158805	-0.310976	0.873383	1.60129	0.168563	-0.0611085	0.508863	1.12932	-0.229687	0.0464989	-0.298185	-0.58029	-0.00756433	-0.0856497
LTR10B2	ERV1	LTR	1.02431	-0.0372921	1.48115	-0.139179	1.29954	1.66486	-0.48069	-0.506314	1.35788	0.891318	0.0141176	-0.209506	1.48718	1.13971	-0.299571	-0.0312506	-0.55496	-0.0487931	0.169492	-0.0924572
LTR10C	ERV1	LTR	-0.0396936	-0.095147	0.35966	-0.00922327	0.0653399	0.60648	-0.0415192	-0.430075	-0.445357	-0.00547192	-0.308553	0.0502996	-0.190329	0.617981	-0.0365383	-0.102407	0.00351721	0.0195629	0.00406258	-0.0431031
LTR10D	ERV1	LTR	0.423322	1.4572	0.207578	0.413646	0.30123	0.858025	-0.410267	-0.892257	-0.503973	0.0217805	-0.389224	-0.0359716	-0.7002	0.154214	-0.134544	0.360371	0.673167	0.497546	0.269114	-0.251165
LTR10E	ERV1	LTR	0.00971752	0.973205	0.949431	-0.022038	0.152583	0.600776	-0.0366789	-0.137152	-0.536977	0.111594	-0.414692	-0.160929	-0.871964	1.03132	-0.146564	-0.335489	-0.162433	0.0484911	-0.00388214	0.0132557
LTR10F	ERV1	LTR	-0.00679225	0.241704	0.744993	0.172812	-0.060301	-0.134373	-0.0797008	-0.0663092	-0.543298	-0.293559	0.04171	0.055815	-0.836419	0.472498	-0.057108	0.0351801	-0.144809	0.366395	0.026859	0.0756823
LTR10G	ERV1	LTR	0.196419	0.00877638	1.27297	0.126261	0.396728	0.458102	-0.176317	-0.462137	0.351977	1.72595	-0.090939	-0.175875	-0.512779	1.28075	-0.194081	-0.307249	-0.579746	-0.0366371	-0.143329	0.0753369
LTR12	ERV1	LTR	0.0508208	-1.01151	0.849308	0.0251827	-0.0785962	-0.189983	0.294246	-0.131288	-0.36963	-0.523373	0.976998	-0.0734735	-1.43453	0.775345	-0.329241	-0.303344	-0.532415	0.257647	-0.173479	-0.0934275
LTR12B	ERV1	LTR	-0.224631	-0.637237	-0.130213	0.448501	-0.0522382	-0.0196169	0.239708	-0.10075	0.0307225	-0.407205	0.356278	-0.170142	-1.16213	0.58105	-0.237324	-0.465184	-0.544345	0.131748	-0.031153	-0.0621487
LTR12C	ERV1	LTR	0.0464274	-0.813687	1.23392	0.0379927	-0.109845	0.0801648	0.238518	-0.089426	0.182323	-0.657807	1.20384	-0.286924	-0.971883	0.769042	-0.412374	-0.375877	-0.359284	0.346905	0.125148	0.0881613
LTR12D	ERV1	LTR	0.0942282	-0.965467	0.996784	-0.00132803	0.00877282	-0.0641386	0.239857	0.190261	0.075129	-0.656969	0.986421	-0.130755	-0.912387	0.638397	-0.268999	-0.175754	-0.415813	0.34118	0.00738154	0.0279483
LTR12E	ERV1	LTR	1.52483	0.216792	1.36414	0.0608104	1.64914	2.0132	-0.0557525	-0.107676	2.67473	1.52493	1.27418	-0.340094	3.02571	0.541717	-0.603315	1.27711	1.08152	0.282338	0.751879	0.161252
LTR12F	ERV1	LTR	0.117324	-0.676604	0.855522	0.128926	-0.164851	-0.241786	0.248314	-0.154441	-0.349218	-0.527337	0.831064	-0.150447	-1.19881	0.732836	-0.112523	-0.250152	-0.252074	0.179371	-0.151045	-0.113124
LTR12_	ERV1	LTR	0.0170068	-0.826789	0.788417	0.0544475	-0.176974	-0.173748	0.20315	-0.18918	-0.259363	-0.530817	0.943374	-0.10643	-1.33227	0.663602	-0.195976	-0.45123	-0.818516	0.224974	-0.0901254	-0.0959824
LTR13	ERVK	LTR	0.095608	-0.0659252	0.294564	-0.421779	-0.224711	-0.222499	0.0795466	-0.0217658	-0.0224604	-0.136471	0.600092	-0.0445262	-0.310052	0.298103	-0.654781	0.121432	0.31238	0.111678	0.0500724	0.0729601
LTR13A	ERVK	LTR	-0.331373	-0.877852	0.141755	0.206547	-0.3308	0.0769283	-0.289358	0.059565	-0.340987	-0.252662	0.0461657	0.0841128	-0.917863	0.0391633	0.0495928	-0.12533	0.242688	0.0626649	-0.00775891	0.0102003
LTR13_	ERVK	LTR	1.04933	0.304404	0.237937	-0.312628	0.293275	-0.213682	-0.289603	-0.0259608	1.32912	0.872794	0.645141	0.24655	0.728148	-0.18	-0.889461	0.877626	0.231213	-0.172187	0.149533	0.113747
LTR14	ERVK	LTR	0.31078	-0.445104	0.234193	0.366365	0.206573	0.392013	0.126162	-0.328585	0.0405995	-0.312919	0.225304	-0.0882344	-0.806213	0.101079	-0.300895	0.196788	0.20302	-0.344901	0.0518316	-0.223554
LTR14A	ERVK	LTR	-0.102953	-0.567873	1.07012	0.177518	-0.0479719	-0.0257268	0.490092	-0.187483	-0.37452	-0.733211	0.714385	-0.0318167	-1.28387	0.484758	-0.0537974	-0.213501	-0.414394	0.621439	-0.0608987	0.0459593
LTR14B	ERVK	LTR	-0.0612978	0.0256585	1.15035	-0.0708589	-0.100644	0.429377	0.214568	-0.280632	-0.291312	-0.703753	0.872659	-0.141861	-1.43275	0.603022	-0.403024	-0.346362	-0.575624	0.152612	-0.0244576	-0.0660724
LTR14C	ERVK	LTR	0.849047	0.767471	0.574883	-0.145316	0.198028	0.409465	0.23628	-0.181103	-0.0380203	-0.413893	0.466268	0.017305	0.193949	0.189295	-0.0266115	-0.35524	-0.707247	0.396279	0.147547	0.126409
LTR15	ERV1	LTR	-0.339888	-0.584834	-0.13498	0.58273	-0.0755771	0.485604	0.0261091	-0.101262	-0.939926	-0.308219	-0.299536	0.159146	-1.10489	-0.245443	0.633972	-0.193347	-0.132771	0.233815	0.174815	0.210288
LTR16	ERVL	LTR	-0.264393	-0.435501	0.221454	0.30457	-0.391949	0.127982	-0.235287	-0.132682	-0.180195	-0.343958	0.222205	-0.175458	-1.45269	-0.157091	0.0648732	-0.332037	-0.104798	0.397444	-0.161525	-0.163773
LTR16A	ERVL	LTR	-0.291135	-0.592791	0.266773	0.298143	-0.40276	0.116011	-0.303091	-0.0960037	-0.0604891	-0.206497	0.270752	-0.140234	-1.3461	-0.111316	0.0752503	-0.343055	-0.161962	0.253039	-0.207121	-0.183986
LTR16A1	ERVL	LTR	-0.30651	-0.249642	0.295032	0.383516	-0.371068	0.130346	-0.333254	0.0108679	-0.203468	-0.390776	0.182181	-0.157907	-1.35902	-0.138634	0.17731	-0.199464	-0.107785	0.438546	-0.193166	-0.191236
LTR16A2	ERVL	LTR	-0.229934	-0.156837	0.174771	0.473894	-0.388236	0.101445	-0.346815	-0.0732333	-0.348091	-0.494273	0.0168503	-0.221799	-1.39462	-0.307818	0.258675	-0.394573	-0.323068	0.432286	-0.187368	-0.194755
LTR16B	ERVL	LTR	-0.260295	-0.701773	0.234639	0.140652	-0.454792	0.00388205	-0.248907	-0.0310551	-0.160835	-0.239973	0.260352	-0.14944	-1.42584	0.037396	-0.0220282	-0.458582	-0.333688	0.228814	-0.208386	-0.162513
LTR16B1	ERVL	LTR	-0.287101	-0.509901	0.335913	0.279613	-0.37697	0.10991	-0.279912	-0.0773272	-0.12261	-0.282514	0.362764	-0.141649	-1.48161	0.0610663	0.066933	-0.348482	-0.440956	0.298369	-0.21226	-0.190149
LTR16B2	ERVL	LTR	-0.209685	-0.426001	0.304069	0.374886	-0.286875	0.109856	-0.170931	-0.0715721	-0.115748	-0.34513	0.251968	-0.0813758	-1.28065	-0.157725	0.156817	-0.424472	-0.244156	0.36218	-0.181715	-0.143408
LTR16C	ERVL	LTR	-0.371802	-0.423683	0.147993	0.508194	-0.409197	0.0308588	-0.308145	0.056089	-0.270765	-0.155476	0.0918058	-0.117993	-1.43919	-0.172417	0.238674	-0.36161	-0.2097	0.396203	-0.137001	-0.169591
LTR16D	ERVL	LTR	-0.317642	-0.699472	0.101739	0.33894	-0.395776	0.0538111	-0.259967	-0.153771	-0.255146	-0.32753	0.135287	-0.127003	-1.42556	-0.1362	0.158504	-0.54447	-0.197089	0.168978	-0.233011	-0.225185
LTR16D1	ERVL	LTR	0.0635284	-0.522406	0.302312	0.705655	-0.306983	-0.0511106	-0.256094	-0.137743	-0.326488	-0.463211	0.220675	-0.150615	-1.09557	-0.105154	-0.0024386	-0.406449	0.123342	0.398058	-0.065532	-0.230073
LTR16D2	ERVL	LTR	-0.227016	-0.438632	0.185851	0.173085	-0.29875	0.144593	-0.0346323	-0.027582	-0.288823	-0.697659	0.164242	0.0835408	-1.66348	0.112452	0.0567463	-0.417647	-0.481555	0.299524	-0.215689	-0.200699
LTR16E1	ERVL	LTR	-0.343505	-0.396275	0.151897	0.431415	-0.410911	0.0348281	-0.265564	0.0349654	-0.266627	-0.382866	0.121623	-0.164161	-1.45238	-0.220324	0.282112	-0.355688	-0.262665	0.387048	-0.16729	-0.178183
LTR16E2	ERVL	LTR	-0.307751	-0.789095	0.149237	0.38085	-0.390818	-0.0292941	-0.287078	-0.161959	-0.161492	-0.33107	0.160218	-0.0960489	-1.45577	-0.15625	0.0814383	-0.328122	-0.359729	0.350198	-0.225866	-0.171283
LTR17	ERV1	LTR	-0.166985	-0.785069	0.760911	0.114109	-0.213305	0.285715	-0.0209891	-0.29489	-0.101511	-0.526666	0.642641	-0.206311	-1.48209	0.358479	-0.295773	-0.28067	-0.366546	0.219307	-0.0136725	-0.073676
LTR18A	ERVL	LTR	-0.189397	0.66519	0.931455	-0.41011	-0.278988	-0.33539	0.284276	-0.361826	0.157706	-0.578393	1.29074	-0.018206	-1.79257	0.809337	-0.702343	-0.147503	-0.242459	0.0960191	-0.232406	-0.103351
LTR18B	ERVL	LTR	0.00530195	0.339044	0.506917	0.0492328	-0.18393	0.508034	-0.210225	-0.11631	0.0921692	-0.28397	0.546328	-0.245651	-1.40749	0.0106926	-0.0993288	-0.0116648	0.534314	0.465208	-0.0598946	-0.150778
LTR18C	ERVL	LTR	-0.0325308	0.469919	0.511275	-0.38328	-0.679664	-0.424346	-0.302491	-0.352894	-0.27796	-0.418297	0.940962	-0.1649	-2.02927	0.16382	-0.416473	-0.480171	-0.392838	-0.171929	-0.21586	0.0135378
LTR19-int	ERV1	LTR	-0.375342	-0.911005	0.01688	-0.0990204	-0.111191	-0.229296	0.305192	-0.192382	-1.00231	-0.434501	-0.150771	-0.0054788	-0.77968	0.353078	0.566213	-0.251273	-0.700713	-0.00175472	0.0196703	0.087277
LTR19A	ERV1	LTR	0.063568	-0.160381	0.455435	0.172556	0.0232692	-0.232202	0.419358	-0.143738	-0.361177	-0.462	0.276018	0.0362522	-0.347236	0.614917	0.375241	-0.34419	-0.691626	-0.033121	-0.0180717	0.114968
LTR19B	ERV1	LTR	-0.0485171	0.177961	0.220934	0.460365	0.23505	0.865963	0.0822904	-0.121112	-0.105336	0.128242	-0.0887094	-0.133121	-0.222961	0.123469	0.372635	0.0165322	0.340261	0.143034	0.139312	-0.0167693
LTR19C	ERV1	LTR	0.912655	2.04625	0.289225	0.419379	0.528242	1.23476	-0.0160618	0.661406	-0.0318154	-0.424402	0.333424	0.0780337	0.126901	-0.175156	0.148552	0.300033	0.564984	0.428305	0.404006	-0.201159
LTR1A1	ERV1	LTR	-0.0439887	-0.561863	0.916276	0.0887306	-0.224548	0.011591	-0.136268	-0.114731	0.111232	-0.493085	0.928541	-0.253218	-1.50899	0.258944	-0.0289646	-0.216416	-0.195449	0.581784	-0.015176	-0.0725768
LTR1A2	ERV1	LTR	0.0114538	-0.267591	0.868512	0.270583	-0.154357	0.252272	-0.355716	0.175635	-0.0378862	-0.507214	0.703761	-0.14838	-1.26957	0.227634	0.0136232	-0.285494	-0.00371244	0.457088	-0.0667133	-0.0758039
LTR1B	ERV1	LTR	-0.171289	-0.832384	0.900053	0.170397	-0.230006	-0.122623	0.210108	-0.223651	0.0494325	-0.767387	0.990289	-0.318349	-1.5461	0.381731	-0.058937	-0.315986	-0.388165	0.403602	-0.0369494	-0.0301081
LTR1B0	ERV1	LTR	-0.230219	-0.682657	0.761834	0.446809	-0.274895	0.161419	-0.0541017	0.00140276	0.0228868	-0.680454	0.838619	-0.0273121	-1.47324	0.119816	0.0194981	-0.0843386	-0.37791	0.741787	-0.101398	-0.135981
LTR1B1	ERV1	LTR	0.00164068	-1.08525	0.9224	0.259118	-0.386188	0.156499	-0.387008	-0.358428	-0.0647836	-0.27693	0.768672	-0.332852	-1.47123	0.0289662	-0.12426	-0.331452	-0.198743	0.516982	-0.0862012	-0.0317863
LTR1C	ERV1	LTR	-0.261344	-0.793111	0.581028	0.265873	-0.224076	0.373167	-0.272711	0.276442	-0.277376	-0.957385	0.588137	-0.094562	-1.41565	0.345169	0.19568	-0.481097	0.409279	0.425929	-0.0457042	-0.0680616
LTR1C1	ERV1	LTR	-0.257683	-1.22402	0.79334	0.387811	-0.440673	0.137106	-0.270981	-0.15921	0.054445	-0.570303	0.948001	-0.0360281	-1.54908	0.559334	-0.060504	0.00571069	-0.255206	0.0263959	-0.183623	-0.259793
LTR1C3	ERV1	LTR	-0.373432	-1.26777	0.512225	0.364036	-0.204455	0.0268775	0.0974838	-0.229729	-0.199169	-0.976748	1.0255	-0.252188	-1.23256	0.11877	-0.0325633	0.0158972	-0.331455	0.497441	-0.100998	-0.324907
LTR1D	ERV1	LTR	-0.0178234	-0.503875	0.962769	0.0021427	-0.0386137	0.578167	-0.203093	-0.250661	0.016101	-0.0544742	0.662214	-0.292738	-1.02737	0.0510191	-0.268169	-0.421692	-0.271143	0.333271	0.0362458	-0.13473
LTR1D1	ERV1	LTR	-0.326415	-0.784265	0.965487	0.127282	-0.181107	0.310907	0.105543	-0.137315	-0.0632555	-0.734339	0.8486	-0.199868	-1.54007	0.447346	-0.145795	-0.26833	0.0120359	0.494385	0.0803552	0.0455127
LTR1E	ERV1	LTR	-0.2497	-1.06782	1.00967	0.109484	-0.246902	0.00394605	0.189642	-0.14988	-0.0642031	-0.717194	1.05161	-0.297682	-1.61706	0.581951	0.0177563	-0.658101	-0.68698	0.417678	-0.0497399	-0.0299377
LTR1F	ERV1	LTR	-0.306171	-1.64345	1.00152	0.277641	-0.272035	-0.20321	0.114275	-0.324541	-0.0306732	-0.663901	1.03516	-0.233446	-1.51035	0.579575	-0.0635016	-0.409257	-0.307986	0.406935	-0.159541	-0.0372705
LTR1F1	ERV1	LTR	-0.383583	-0.968054	0.786933	0.242041	-0.18168	-0.10685	0.0437277	-0.210866	-0.0917608	-0.650579	0.921343	-0.260331	-1.52324	0.609502	0.023028	-0.544516	-0.548621	0.222025	-0.0186115	0.0783812
LTR1F2	ERV1	LTR	-0.377014	-1.16478	0.973349	0.0251939	-0.243842	-0.116086	0.101874	-0.29882	-0.178509	-0.330663	0.92311	-0.342512	-1.48979	0.607333	-0.0714554	-0.16095	-0.351624	0.580761	-0.208668	0.0868671
LTR2	ERV1	LTR	0.0813422	-0.622647	0.34441	0.287941	0.103983	0.233456	0.175959	0.331837	-0.279143	-0.379532	0.248922	0.0672259	-0.444695	0.340824	0.273047	-0.121134	-0.0702554	0.255453	0.0830023	0.0690606
LTR21A	ERV1	LTR	0.0573682	-0.609571	0.117249	0.464092	0.0329217	0.304137	-0.10151	0.270075	0.0327943	-0.327206	0.237786	0.114393	-0.995798	-0.00757424	0.155244	-0.447602	-0.67246	0.21671	0.0684546	0.197831
LTR21B	ERV1	LTR	0.221488	-0.862865	0.875272	0.0665585	0.210437	-0.0269836	-0.139605	-0.197123	0.747441	-0.533491	0.821881	0.344843	-0.694772	0.321618	-0.212966	0.0782945	0.696676	0.292559	0.0542681	-0.342013
LTR21C	ERVL	LTR	-0.441749	-0.904643	0.62368	-0.0860538	-0.865873	-0.324623	-0.945079	-1.02893	0.154889	-1.24759	0.654563	-0.330545	-1.90569	-0.357149	-0.248166	-0.675813	-0.135986	0.00787959	0.333003	0.257311
LTR22	ERVK	LTR	-0.120371	-0.241942	0.229135	-0.122315	0.119609	0.248383	0.0590323	0.312246	-0.511339	-0.370401	-0.092395	-0.0708778	-1.23797	-0.280215	0.220633	-0.527643	-0.337622	0.204169	0.338954	0.12205
LTR22A	ERVK	LTR	-0.325396	-1.06195	0.450713	0.330371	-0.211604	0.189106	0.276116	0.0826797	0.0494421	-0.399457	1.12548	-0.13878	-1.35013	0.362218	0.0953809	-0.687247	-0.669043	0.506977	0.0835602	0.0130023
LTR22B	ERVK	LTR	-0.170042	-0.504175	0.471158	-0.142716	0.256878	0.338012	0.307101	-0.0839968	-0.246143	-0.346667	0.692785	0.00966686	-1.1778	0.243433	-0.132187	-0.158342	-0.344709	0.215455	0.105371	0.0956724
LTR22B1	ERVK	LTR	0.0244687	-0.982241	0.714472	0.24604	0.232553	0.623195	0.320528	-0.214453	-0.183082	-0.42584	0.745545	0.00825413	-1.26638	0.557871	-0.0212612	-0.634155	-0.40954	0.0869989	0.0580652	0.0268465
LTR22B2	ERVK	LTR	0.828889	-0.694459	0.256693	0.0230683	0.306483	0.201659	-0.327715	-0.480331	0.263686	-0.366088	-0.0886005	0.180048	-0.990551	-0.106522	0.265353	-0.0511748	0.0122376	0.434002	-0.257976	-0.191746
LTR22C	ERVK	LTR	0.174962	-1.34124	1.08832	0.458075	0.646687	0.133569	0.913212	0.143901	-0.151506	-0.13054	0.952675	0.363394	-1.19843	1.44308	0.201076	0.38347	-0.101894	0.483192	-0.153142	0.647795
LTR22C0	ERVK	LTR	-0.0207093	1.00461	0.965504	0.0431752	0.124055	0.226461	0.632338	-0.0683165	-0.169404	-0.403279	1.18995	-0.289756	-1.32358	1.10664	-0.175924	-0.219962	0.23706	-0.205256	0.318317	0.286956
LTR22C2	ERVK	LTR	-0.199384	-0.932883	0.670396	0.268165	0.226583	0.416586	0.261947	-0.133537	-0.340356	-0.602961	0.741559	0.137646	-1.55564	0.52882	-0.0481226	-0.74425	-0.140869	0.532753	0.0635341	0.111913
LTR22E	ERVK	LTR	0.165139	-0.972506	0.953793	-0.0868056	-0.116858	-0.088886	0.374768	-0.276936	-0.172035	-0.300371	1.12264	-0.0521747	-1.29324	1.15037	-0.281898	-0.268976	-0.830763	-0.111005	0.195992	0.17339
LTR23	ERV1	LTR	0.192488	0.195918	-0.211875	0.106083	0.0675494	0.165481	-0.12816	-0.306054	-0.0962153	-0.0812429	-0.316015	-0.0428466	0.167711	-0.134329	0.0160834	0.0367704	-0.137247	-0.175601	0.076028	0.105094
LTR23-int	ERV1	LTR	-0.222072	-0.172623	-0.303789	0.199572	-0.367576	-0.0364108	-0.0108027	-0.402028	-1.30249	-0.688291	-0.73777	-0.272943	-0.589911	-0.189363	0.726271	-0.0344766	-0.131384	-0.360159	-0.00719928	0.0859769
LTR24	ERV1	LTR	0.147129	0.952356	-0.272628	-0.0457042	-0.207258	0.00808996	-0.122893	-0.416062	-0.494654	-0.345969	-0.381455	-0.203071	-0.0639132	-0.304057	0.00934229	-0.377655	-0.241416	-0.268844	0.0649128	0.0568671
LTR24B	ERV1	LTR	0.0590256	0.452742	-0.43188	0.375701	-0.0632132	0.0369381	-0.241254	-0.0836163	-0.409928	-0.14765	-0.548369	0.037653	-0.0217212	-0.425846	0.392925	-0.0714966	-0.0579784	-0.110929	-0.0858885	-0.119526
LTR24C	ERV1	LTR	-0.479494	-0.435767	-0.37163	0.117913	-0.0957503	0.34087	-0.0583119	-0.394654	-0.708719	-0.356316	-0.630601	-0.188786	0.886837	-0.0990899	0.484745	-0.133336	-0.367833	-0.127216	-0.0317817	-0.10284
LTR25	ERV1	LTR	1.24747	2.50911	0.0734639	-0.491496	0.428424	0.943943	-0.139141	-0.666042	0.05885	0.669885	0.241056	-0.0309146	0.82529	0.311868	-0.280331	0.295865	0.523012	0.108592	0.286113	0.134026
LTR25-int	ERV1	LTR	-0.308965	-0.686739	0.336478	-0.176101	-0.00407101	-0.435382	0.485749	-0.376846	-0.802246	-0.56098	0.322069	-0.118155	-1.10148	0.628053	0.103007	-0.181127	-0.694823	0.0403876	0.127245	0.184031
LTR26	ERV1	LTR	0.337257	1.42286	0.333651	-0.11849	-0.176057	-0.115295	0.118639	-0.080806	-0.38937	-0.332653	0.451101	-0.0723729	-0.888035	0.395596	-0.0107804	-0.244854	-0.484942	0.327295	-0.0979373	-0.0265586
LTR26B	ERV1	LTR	-0.580468	0.156181	-0.230621	0.45865	-0.105156	0.375174	-0.097953	-0.158674	-0.672842	-0.402613	-0.0815799	-0.0504511	-1.43013	0.00254857	0.220267	-0.468169	-0.0856169	0.0653882	-0.165313	-0.144279
LTR26C	ERV1	LTR	-0.0793577	-0.00380765	-0.0412428	0.331001	-0.0499426	0.0331423	-0.366579	-0.231844	0.0928643	-0.21608	0.0777338	-0.140932	-0.0602866	-0.115216	0.010749	-0.244826	-0.139084	0.311233	-0.0939888	-0.137304
LTR26D	ERV1	LTR	-0.433576	0.150165	-0.0945926	0.328086	-0.213343	0.165071	-0.2423	-0.152833	-0.4288	-0.30353	-0.0875548	0.00246324	-1.44482	-0.0834941	0.112741	-0.80185	-0.225927	-0.108376	-0.0343141	-0.215243
LTR26E	ERV1	LTR	1.18868	0.106172	0.248543	0.371364	1.23945	0.3753	-0.317922	-0.0737282	2.05616	0.49421	0.0383625	-0.243384	2.68391	-0.0265147	0.158333	0.742916	-0.0614109	-0.0503647	0.0152828	-0.201468
LTR27	ERV1	LTR	-0.275592	-0.725087	0.715064	0.0578004	-0.355005	0.269364	-0.350891	-0.437951	-0.151337	-0.1856	0.179927	0.0674818	-1.22774	0.563166	0.0484344	0.0184616	-0.605744	0.534139	0.139225	0.0495142
LTR2752	ERV1	LTR	-0.0475644	-0.992923	1.60259	-0.310626	-0.347919	0.197318	-0.378506	-0.499438	0.0653546	-0.874297	0.72331	-0.492959	-0.79285	0.767969	-0.423745	-0.517544	-0.382698	0.244354	0.115133	-0.0122724
LTR27B	ERV1	LTR	-0.119793	-0.799014	1.03017	0.154646	-0.108921	0.381064	-0.294075	-0.333467	-0.133326	-0.206042	0.285592	-0.32303	-1.46037	0.717189	-0.135677	-0.0839776	-0.124401	0.344186	0.0481705	-0.074599
LTR27C	ERV1	LTR	-0.0372803	-0.850366	1.10052	-0.130959	-0.387555	0.212634	-0.263274	-0.240039	-0.227116	-0.519738	0.374134	-0.281661	-1.39136	0.705674	-0.302542	-0.390117	-0.630672	0.277844	0.0270714	-0.0139477
LTR27D	ERV1	LTR	0.062037	-0.944063	1.0468	-0.051783	-0.198236	0.417606	-0.119756	-0.535267	-0.339458	-0.44116	0.414416	-0.196513	-1.33991	0.575987	-0.322344	-0.284848	-0.429694	0.188769	-0.02729	-0.165394
LTR27E	ERV1	LTR	-0.0538664	-0.781057	1.25376	-0.152578	-0.408832	0.311763	-0.31332	-0.499258	0.0193606	-0.618917	0.675886	-0.270838	-1.49338	0.671314	-0.44388	-0.443254	-0.378732	0.150013	-0.0951573	-0.0828267
LTR28	ERV1	LTR	-0.22987	-0.875426	0.739474	-0.15149	-0.432518	0.00490029	-0.29347	-0.413329	-0.30626	-0.552495	0.486772	-0.195828	-1.68285	0.451617	-0.294998	-0.429867	-0.611244	0.215243	-0.103689	-0.133398
LTR28B	ERV1	LTR	-0.291155	-0.52292	0.954461	0.126584	-0.265855	0.0109218	-0.0303058	-0.0450576	-0.168268	-0.452047	0.738474	-0.250209	-1.57719	0.497842	-0.189792	-0.534398	-0.29589	0.282785	0.0880655	0.0250298
LTR28C	ERV1	LTR	-0.10274	-0.978393	1.15606	-0.0835816	-0.300567	0.207951	-0.445837	-0.519555	-0.0420395	-0.57016	0.235695	-0.259775	-1.35778	0.725046	-0.213698	-0.573432	-0.609279	0.0824244	0.0306681	0.0318128
LTR29	ERV1	LTR	-0.342594	-0.65052	-0.0762502	0.305729	-0.114985	0.25318	-0.0430937	-0.280201	-0.445283	-0.393398	-0.054574	0.0307531	-0.728202	-0.0622084	0.429424	-0.35106	-0.288429	0.140506	-0.0287727	-0.0139208
LTR2B	ERV1	LTR	0.219425	-0.106123	0.10289	-0.175666	0.0663773	0.651811	-0.0108631	-0.26911	-0.173458	-0.0968237	0.0936029	-0.119931	0.393891	-0.0665645	0.0970181	-0.0329307	0.31475	0.100202	0.157634	-0.05325
LTR2C	ERV1	LTR	1.01726	0.42547	0.225275	0.782942	0.34814	0.350596	-0.0675922	0.625316	0.0856691	-0.30924	0.049241	0.195021	0.895007	0.0370577	0.463371	0.107619	-0.171083	0.0612419	-0.0233379	0.0858667
LTR3	ERVK	LTR	0.722272	0.21987	1.05019	0.242105	0.560249	0.185232	0.520396	0.149492	0.510217	-0.332177	0.785081	-0.241287	0.0689409	0.603406	-0.0935178	-0.114322	-0.769988	-0.0714321	-0.0345183	-0.0669362
LTR30	ERV1	LTR	0.814149	0.278374	0.267616	0.434967	0.261489	0.474066	-0.11174	-0.324613	-0.361315	-0.404414	0.133035	0.130649	0.0854802	-0.19222	0.312443	0.18139	-0.317046	0.407554	0.0793821	0.118338
LTR31	ERV1	LTR	-0.404183	-0.994568	0.0518074	0.307379	-0.402007	-0.125386	-0.18073	-0.376079	-0.221297	-0.231785	0.0869926	-0.219924	-1.39154	0.0993091	-0.200427	-0.302511	0.128158	0.0344214	-0.123173	-0.126394
LTR32	ERVL	LTR	-0.231526	-0.228677	0.293746	0.319313	-0.426903	-0.0602649	-0.336811	-0.178308	-0.211297	-0.469272	0.348837	-0.174779	-1.41291	-0.059163	0.0318814	-0.431776	-0.112753	0.351227	-0.10089	-0.109981
LTR33	ERVL	LTR	-0.267446	-0.175284	0.230875	0.37298	-0.335528	0.161915	-0.25033	-0.0783523	-0.175216	-0.215925	0.177361	-0.122512	-1.32328	-0.177472	0.147868	-0.349376	-0.102385	0.313608	-0.159972	-0.186519
LTR33A	ERVL	LTR	-0.172345	-0.264174	0.17325	0.420725	-0.283448	0.226151	-0.234923	-0.182319	-0.233447	-0.295475	0.13952	-0.152687	-1.04438	-0.220386	0.132564	-0.269522	-0.02827	0.365705	-0.147671	-0.208217
LTR33A_	ERVL	LTR	-0.411308	-0.235525	0.137854	0.300622	-0.171509	0.264926	-0.314983	-0.226588	-0.327194	-0.414932	0.124014	-0.118214	-1.35326	-0.207707	0.135457	-0.215805	-0.117116	0.413435	-0.153795	-0.200715
LTR33B	ERVL	LTR	-0.359702	-0.54561	-0.0253271	0.276071	-0.25849	0.129022	-0.136172	-0.116375	-0.29495	-0.142982	0.0176126	-0.0789817	-1.26403	-0.236396	0.16489	-0.150646	-0.164829	0.356805	-0.192882	-0.104345
LTR33C	ERVL	LTR	-0.163051	-0.607207	0.114457	0.25158	-0.334072	-0.0681265	-0.215359	-0.232679	-0.306709	-0.462282	0.148497	-0.211266	-1.01509	-0.0787217	0.0311571	-0.386838	-0.484595	0.230884	-0.206887	-0.196122
LTR34	ERV1	LTR	-0.115024	0.321835	-0.255563	0.299273	-0.0651874	0.136485	-0.23111	-0.345209	-0.0844035	-0.134008	-0.0605389	-0.0717393	-0.728522	-0.474892	0.310486	-0.173524	-0.276108	0.0349554	-0.0585391	-0.01379
LTR35	ERV1	LTR	-0.131924	1.43073	0.0498548	0.0128916	-0.486574	0.231726	-0.495622	-0.693286	-0.2876	-0.534216	-0.00106112	-0.326887	-1.48482	-0.235623	-0.327457	-0.0647248	-0.262499	0.178846	-0.0776486	-0.196398
LTR35A	ERV1	LTR	-0.0222585	1.87281	0.0514535	0.242729	-0.40075	0.505439	-0.335478	-0.342666	-0.0618199	-0.402624	0.270363	-0.167937	-1.0673	-0.426538	-0.592729	0.0138317	0.356564	0.257862	-0.0444184	-0.353008
LTR35B	ERV1	LTR	-0.277432	-1.63643	0.0580663	0.20453	0.17533	0.10127	-0.0126017	-0.198449	0.0346763	-0.575618	0.294824	0.0796541	-1.06569	-0.00933494	0.24132	-0.183306	-0.101721	0.379866	0.0235062	0.0423072
LTR36	ERV1	LTR	0.0243899	-0.713302	0.115452	0.711865	-0.00496099	0.327934	-0.232974	0.0170238	-0.0977208	-0.284581	-0.0406867	-0.109056	-0.605598	-0.270446	0.335512	-0.470249	-0.452152	0.1322	0.0101176	0.00928485
LTR37-int	ERV1	LTR	-0.623013	-0.193962	-0.493427	-0.396695	-0.380378	-0.171213	-0.0124091	-0.557203	-1.07808	-0.376629	-0.463639	-0.0325507	-0.819546	-0.247436	0.135026	-0.0565842	-0.388551	-0.146499	-0.106153	-0.0772391
LTR37A	ERV1	LTR	-0.545518	-0.285102	-0.442573	-0.0631869	-0.295827	-0.25083	-0.00900855	-0.383708	-0.763313	-0.200248	-0.499553	-0.0105478	-0.47667	-0.449387	0.309545	-5.73635e-05	-0.195815	0.134241	-0.161298	-0.0821705
LTR37B	ERV1	LTR	-0.498356	-0.335466	-0.528784	-0.0735876	-0.369594	-0.321039	-0.0950695	-0.202226	-0.802172	-0.251943	-0.480727	-0.00683497	-0.468302	-0.411914	0.422273	-0.137489	-0.225232	0.00688828	-0.247643	-0.117461
LTR38	ERV1	LTR	-0.390825	-1.15738	0.117141	0.383842	-0.417702	0.176846	-0.226496	-0.55881	-0.483975	-0.717567	0.0331034	-0.195725	-1.37376	-0.18037	-0.0164402	-0.541288	-0.409463	0.125832	-0.0515224	-0.0764454
LTR38-int	ERV1	LTR	-0.400726	-1.05018	0.264608	0.232313	0.072697	0.226738	0.253656	-0.251145	-1.0054	-0.593611	-0.0884381	-0.0905612	-1.51621	0.211945	0.0156218	-0.366765	-0.664679	0.253315	-0.200362	-0.160934
LTR38A1	ERV1	LTR	-0.117294	-0.319104	0.180578	0.179052	-0.15503	0.210554	-0.313509	-0.507772	-0.686857	-0.811633	-0.0666218	-0.136237	-1.13927	-0.0667912	-0.0585574	0.0792706	-0.0540229	0.471048	-0.296732	-0.231786
LTR38B	ERV1	LTR	-0.30826	-0.0665683	-0.0166147	0.436207	-0.351079	0.148429	-0.253309	-0.146279	-0.835098	-0.844228	-0.0720261	-0.199938	-1.16599	-0.172188	0.181358	-0.125069	-0.181994	0.134372	-0.0394333	-0.0904955
LTR38C	ERV1	LTR	-0.393848	-0.604614	0.0774967	0.655014	-0.384271	0.213699	-0.19943	-0.212979	-0.492075	-0.568861	-0.199285	-0.253652	-1.24391	-0.066048	0.200428	-0.569438	-0.71017	0.175919	0.0610296	0.159047
LTR39	ERV1	LTR	-0.257511	-0.140286	-0.0733412	0.42076	-0.260008	0.249236	-0.191365	-0.176663	-0.739819	-0.264937	-0.143151	-0.132036	-1.36919	-0.140139	0.28254	-0.372906	-0.296847	0.172298	0.0908676	0.0427691
LTR39-int	ERV1	LTR	-0.533373	-1.2851	-0.160905	0.474447	-0.427068	0.596759	0.0559835	-0.69209	-1.00749	-0.824733	-0.104627	-0.39871	-1.47968	-0.56918	0.59207	-0.219344	-0.22783	0.410446	0.184213	0.09757
LTR3A	ERVK	LTR	-0.244885	-1.09826	0.600094	0.0458048	-0.104232	-0.103406	0.183742	-0.225029	-0.214368	-0.256329	0.617101	-0.222531	-1.27929	0.437401	-0.22236	-0.174357	-0.235439	0.137121	-0.00044254	0.100498
LTR3B	ERVK	LTR	0.188891	0.344286	0.804194	0.228302	-0.245734	0.245913	0.0158896	-0.0973888	-0.216122	-0.494678	0.137861	-0.329362	-0.81786	0.369433	-0.063759	-0.184123	-0.227939	0.471876	-0.0932586	-0.00895142
LTR3B_	ERVK	LTR	-0.109896	0.208896	0.495989	0.188962	-0.133266	0.216319	0.0595905	-0.122779	-0.117202	-0.238789	0.44396	-0.0673711	-1.08233	0.213187	0.0833286	-0.280024	-0.168328	0.269952	-0.155727	-0.134899
LTR4	ERV1	LTR	0.224016	0.88845	0.814934	0.573618	0.290211	0.694839	0.380765	-0.583398	0.254684	1.11169	0.520882	-0.142733	-0.0676908	0.623542	-0.690805	-0.11521	-0.190525	0.14792	0.417766	-0.0135186
LTR40A1	ERVL	LTR	-0.335973	-0.0936804	-0.00669138	0.100495	-0.249256	0.0595628	-0.14026	-0.294804	-0.626047	-0.351892	-0.0473718	-0.0714294	-1.21859	-0.300161	0.053885	-0.198122	-0.197623	0.0806252	-0.0658345	0.00119414
LTR40a	ERVL	LTR	-0.323696	-0.564226	0.0352572	0.0823349	-0.200547	0.00758913	-0.0420088	-0.252274	-0.293902	-0.0352845	0.109245	-0.144861	-1.04158	-0.185339	0.00927381	-0.327064	-0.322129	0.138039	-0.1541	-0.118526
LTR40b	ERVL	LTR	-0.270577	-0.389334	0.0325112	0.138455	-0.207568	0.127129	-0.0693884	-0.270687	-0.265173	-0.179042	0.102781	-0.165976	-1.25955	-0.157585	-0.160642	-0.202078	-0.0804128	0.152529	-0.174806	-0.140603
LTR40c	ERVL	LTR	-0.133056	0.368593	0.171206	0.0739745	-0.259571	0.177918	-0.178137	-0.366142	-0.0631669	-0.105886	0.218516	-0.246328	-1.07458	-0.00792997	-0.234462	-0.0690684	0.0351282	0.106958	-0.167524	-0.20073
LTR41	ERVL	LTR	-0.143754	-0.35738	0.470182	0.148734	-0.303489	0.0487453	-0.168947	-0.275173	-0.255992	-0.474698	0.391843	-0.217926	-1.05875	0.21818	-0.188404	-0.0582989	0.0943785	0.133246	-0.151559	-0.0685304
LTR41B	ERVL	LTR	-0.184717	-0.332586	0.373332	0.0922479	-0.206521	-0.0342718	-0.187582	-0.196186	-0.183327	-0.520793	0.33729	-0.13876	-0.897024	0.018914	-0.334147	-0.117882	-0.0991819	0.315109	-0.0792634	-0.136906
LTR41C	ERVL	LTR	-0.246976	-0.289095	0.211463	0.269364	-0.340154	0.194343	-0.257583	-0.398399	-0.390499	-0.430876	0.229127	-0.180044	-0.980177	-0.148966	-0.126486	-0.239961	-0.133788	0.179891	-0.106558	-0.133361
LTR42	ERVL	LTR	-0.296192	-0.247871	0.0396479	0.235541	-0.117422	0.412312	-0.136673	-0.184553	-0.431952	-0.357812	0.013904	-0.226025	-1.20535	-0.239043	-0.00743603	-0.122945	0.0288189	0.444249	-0.00406534	-0.100765
LTR43	ERV1	LTR	0.00491951	-0.361929	0.0967248	0.379241	-0.217023	-0.292311	-0.0791859	0.0584298	-0.300529	-0.136559	0.0651227	0.00844892	-1.20448	-0.333984	-0.00566143	-0.179001	-0.199664	0.53304	-0.156424	-0.0646799
LTR43-int	ERV1	LTR	0.692344	-0.654274	-0.183724	0.665442	-0.0368681	-0.181909	-0.107535	-0.0817479	-0.466831	-0.464206	-0.0831161	0.101016	-0.8257	-0.815681	0.0522292	0.313058	-0.0870028	0.157222	-0.00850039	-0.00709204
LTR43B	ERV1	LTR	0.0310152	-0.148381	0.227759	0.119829	-0.50873	-0.0366926	-0.232529	-0.107376	-0.354887	-0.513636	0.103117	-0.198436	-1.09387	-0.143281	-0.0469664	-0.205338	-0.267345	0.322983	-0.131414	-0.179414
LTR44	ERV1	LTR	-0.103358	0.622554	-0.175925	-0.041471	0.0563259	-0.0457979	0.224176	-0.219692	-0.247725	-0.24387	-0.00670194	-0.0337204	-0.42523	-0.246949	0.332131	-0.304264	-0.468486	0.102258	0.0195786	0.150089
LTR45	ERV1	LTR	-0.257029	-0.584773	-0.039986	0.377656	-0.321756	-0.0611389	-0.281992	0.529996	-0.469077	-0.448663	0.019421	-0.112171	-1.09439	-0.279204	-0.253008	-0.394018	0.151428	0.0528549	-0.326608	-0.307833
LTR45B	ERV1	LTR	-0.254253	-0.396384	0.268733	0.205233	-0.233466	0.0149401	-0.0887612	-0.389351	-0.080517	-0.286071	0.367453	-0.135506	-1.70385	0.0586414	-0.576162	-0.38431	0.175579	0.250673	-0.313616	-0.203503
LTR45C	ERV1	LTR	-0.144848	-0.118606	-0.183537	0.328983	-0.255515	0.200342	-0.0200987	-0.0428912	-0.735395	-0.191748	-0.109408	-0.161958	-1.31656	-0.0486344	0.242019	-0.203231	-0.00321928	0.246362	-0.10928	-0.114689
LTR46	ERV1	LTR	0.738421	0.266192	0.342008	0.258093	0.393513	0.303463	0.0713222	0.375762	0.247275	-0.217862	0.227578	-0.294375	0.388395	-0.0844173	0.00363201	0.0932784	0.272472	0.120426	-0.0504981	-0.11015
LTR46-int	ERV1	LTR	-0.00052119	-0.867513	0.692738	0.477252	-0.374968	-0.312717	-0.175558	-0.183813	-0.669578	-1.03096	0.119214	-0.447397	-1.30427	-0.042168	0.482956	-0.217362	-0.660782	0.680379	-0.018901	0.00572293
LTR47A	ERVL	LTR	-0.299101	-0.526446	0.207911	0.329545	-0.432181	-0.0972901	-0.165159	-0.210894	-0.572328	-0.589821	0.146069	-0.142089	-1.33009	-0.0765079	0.141546	-0.426314	-0.424169	0.0313534	-0.0447992	-0.0867889
LTR47A2	ERVL	LTR	-0.191218	0.0207981	-0.0177099	0.395197	-0.422851	-0.176646	-0.0905734	-0.360242	-0.275759	-0.320562	0.347044	0.0163636	-1.47529	-0.0207005	-0.0721795	-0.732844	-0.351835	-0.14205	0.00245844	-0.183738
LTR47B	ERVL	LTR	-0.621676	-0.84268	-0.153763	0.24173	-0.283185	-0.667594	-0.0593574	-0.261367	-0.135084	-0.498285	0.580337	-0.59424	-1.20935	0.198897	0.280488	-0.305655	0.12182	-0.119003	-0.43624	-0.331033
LTR47B2	ERVL	LTR	-0.343368	0.100045	-0.0491528	0.114976	-0.335443	-0.081707	-0.198808	-0.058357	-0.246734	-0.440213	0.16312	-0.217241	-1.2912	0.00778533	0.0622735	-0.126999	-0.304901	0.289566	-0.294938	-0.285262
LTR47B3	ERVL	LTR	-0.470492	-1.37452	-0.13964	0.152639	-0.430185	0.00937615	-0.118279	0.150284	-0.425188	-0.386298	0.121502	-0.173047	-1.71777	-0.0511262	0.149036	0.0680726	-0.0745284	0.559775	-0.363301	-0.226183
LTR47B4	ERVL	LTR	-0.0129028	1.52401	0.132819	0.642477	-0.393048	0.0263311	-0.357692	0.00688361	-0.712556	-0.828683	-0.0999475	-0.0867401	-1.68865	-0.163727	0.303265	-0.726502	-0.317921	-0.361084	-0.238112	-0.0643754
LTR48	ERV1	LTR	-0.296801	-0.458055	-0.197105	0.368951	-0.0351119	0.549343	-0.146003	-0.182685	-0.5287	0.0105032	-0.0632307	-0.0100113	-0.862719	-0.215016	0.315106	-0.311987	-0.408917	0.147364	-0.0465134	-0.0501388
LTR48B	ERV1	LTR	-0.295289	-0.406226	-0.0178518	0.41048	-0.200011	0.280152	-0.159412	-0.282486	-0.458756	-0.275869	-0.0487958	-0.0335205	-1.07958	-0.286862	0.196618	-0.396652	-0.167681	0.144942	0.0250386	-0.00758187
LTR49	ERV1	LTR	-0.246561	-0.740178	0.106116	0.36439	-0.0964431	0.303169	0.036967	-0.172934	-0.361199	-0.0885889	-0.0477054	0.0150729	-0.841792	-0.433423	0.201476	-0.389258	-0.300642	0.183834	0.0923109	0.107352
LTR49-int	ERV1	LTR	-0.580217	-0.606558	-0.12535	-0.0255721	-0.20817	-0.173481	0.218596	-0.523803	-1.10021	-0.471775	-0.150408	-0.0621863	-0.965731	-0.112748	0.296671	-0.25535	-0.540485	0.0359646	-0.00214439	0.0505501
LTR5	ERVK	LTR	0.0675221	-0.229764	0.218971	0.948874	0.470133	0.297037	-0.319876	0.351878	-0.202171	-0.281806	0.531478	0.333265	-1.32399	0.174085	0.0353745	-0.353948	0.211997	0.403373	-0.17811	-0.393318
LTR50	ERVL	LTR	-0.23777	-0.371231	0.0526805	0.282235	-0.344896	0.153943	-0.28391	-0.235054	-0.364124	-0.27586	-0.0199705	-0.153373	-1.00809	-0.221791	0.0528536	-0.193597	0.048834	0.226003	-0.144708	-0.176351
LTR51	ERV1	LTR	-0.314345	-0.19468	-0.0697721	0.211471	-0.338821	0.2155	-0.384081	-0.244184	-0.151712	-0.0226456	-0.0902763	-0.0424832	-0.819553	-0.483166	-0.117471	-0.28496	-0.213271	0.342075	-0.147557	-0.097632
LTR52	ERVL	LTR	-0.290226	-0.643982	0.274151	0.128779	-0.301464	0.0659843	-0.0953734	-0.318799	-0.377837	-0.184415	0.198419	0.0244922	-1.4318	-0.178963	-0.0756175	-0.402143	-0.569218	0.262113	-0.0739351	-0.0431178
LTR52-int	ERVL	LTR	-0.444927	-0.879689	0.237237	0.104808	-0.351237	-0.1501	0.0215653	-0.132781	-0.586366	-0.591501	0.0511456	0.0261098	-1.59683	-0.477796	-0.114811	-0.244141	-0.927333	0.272727	-0.186425	-0.129461
LTR53	ERVL	LTR	-0.161302	-0.1958	0.431967	-0.0409635	-0.37899	-0.0349218	-0.28776	-0.160827	-0.0201847	-0.275287	0.395864	-0.175624	-1.21769	-0.110585	-0.0924236	-0.315731	-0.33845	0.37785	-0.151067	-0.174918
LTR53-int	ERVL	LTR	-0.173315	-0.747249	0.350617	-0.158678	-0.219423	-0.136121	0.17855	-0.607556	-0.591995	-0.539008	0.35178	-0.259694	-1.22994	-0.228563	-0.112327	-0.556979	-0.701585	0.261417	-0.0132673	0.0642843
LTR53B	ERVL	LTR	0.1157	-0.138773	0.447345	0.257165	-0.323746	-0.137548	-0.260476	0.506575	0.801019	-0.0677003	0.308794	-0.104859	-0.966629	-0.152018	0.147188	-0.55465	-0.694621	0.325485	-0.201699	-0.084832
LTR54	ERV1	LTR	-0.194233	0.216702	-0.356682	0.24987	-0.161123	0.203704	-0.147995	-0.399389	-0.60993	-0.279631	-0.435448	-0.10672	-0.504543	-0.218066	0.231779	-0.219503	0.0733809	-0.208257	-0.00827184	-0.0336687
LTR54B	ERV1	LTR	-0.243981	-0.218957	-0.252062	0.0706767	-0.188533	0.165708	-0.0765631	-0.38412	-0.69811	-0.423623	-0.161376	-0.0779936	-0.802818	-0.038269	0.229588	-0.132279	-0.11867	0.195627	0.0271245	0.0232869
LTR55	ERVL	LTR	-0.145842	-0.649481	0.168127	0.0588832	-0.18722	-0.00291436	-0.0984583	-0.321414	-0.197498	-0.551852	0.189384	-0.152267	-0.972788	-0.295551	-0.0252139	-0.158664	-0.0685166	0.486227	-0.0562649	-0.0210571
LTR56	ERV1	LTR	-0.254469	-0.472852	-0.145469	0.180581	-0.0874088	0.156792	-0.00382638	-0.15053	-0.448054	-0.233817	-0.139729	-0.075673	-0.586901	-0.268147	0.126882	-0.0758374	-0.0348732	0.0688149	0.0353347	-0.0814037
LTR57	ERVL	LTR	-0.149421	-0.597877	0.0347977	0.0920857	-0.563436	-0.0234778	-0.239039	-0.162162	-0.299328	-0.594441	0.21528	-0.278373	-1.37778	0.186031	0.161095	-0.511078	-0.575789	0.0514293	-0.0297706	0.0827787
LTR57-int	ERVL	LTR	-0.46693	-0.351405	0.10103	-0.358052	-0.238854	-0.29688	0.193291	-0.428772	-1.05939	-0.629509	-0.177561	-0.0507559	-1.36315	-0.484161	0.0951968	-0.20458	-0.619354	0.042501	-0.0481718	-0.152196
LTR58	ERV1	LTR	-0.297526	-0.680059	0.31705	0.0982176	-0.303854	0.195047	-0.0878246	-0.483741	-0.680809	-1.15626	0.190253	-0.41261	-1.43715	-0.09969	-0.315219	0.0127147	0.133583	0.488411	-0.245805	-0.318839
LTR59	ERV1	LTR	-0.310631	-0.774225	-0.107703	0.351463	-0.310045	0.21312	-0.379135	-0.518856	-0.607193	0.129314	-0.06829	0.0224013	-1.42745	-0.0933585	0.2932	-0.301921	-0.681677	0.282404	0.039687	-0.0492577
LTR5A	ERVK	LTR	0.0462214	-0.935321	0.51884	0.757993	-0.180269	-0.091779	0.0322485	0.68723	-0.349887	-0.406447	0.312418	-0.075341	-0.884634	-0.237033	0.776592	-0.289828	-0.352715	0.302959	0.0989702	0.108495
LTR5B	ERVK	LTR	0.00606067	-0.628027	0.440747	0.472393	0.176353	0.629923	0.0359885	-0.0770511	0.110795	-0.225657	0.273872	-0.121931	-0.356176	0.0760004	0.275259	-0.0960457	0.0677685	0.151435	0.130898	-0.101389
LTR5_Hs	ERVK	LTR	-0.0715918	-0.675069	0.43311	0.639977	0.701507	0.795362	-0.233183	0.142214	-0.00441792	-0.305012	0.462543	0.0612227	-0.727437	0.186415	0.181135	-0.151585	-0.256969	0.354308	0.191474	-0.215406
LTR60	ERV1	LTR	-0.143543	-0.338444	0.472038	-0.669874	-0.0711675	0.769794	-0.0866823	-0.19375	-0.0131269	-0.629218	0.616382	-0.372018	-1.50342	1.00361	0.165106	0.0204879	-0.557557	0.0797858	0.0374397	-0.279661
LTR60B	ERV1	LTR	-0.215475	-0.965018	0.373732	0.191195	0.222307	0.0760331	0.21114	-0.432599	0.139296	0.526247	0.4036	-0.217705	-0.392541	0.232108	-0.241281	-0.24755	-0.286213	0.129175	-0.217518	-0.129667
LTR61	ERV1	LTR	0.330438	1.30617	-0.148704	0.0768949	0.0209314	-0.229176	0.0783718	-0.156165	-0.139045	-0.330226	-0.212895	-0.0146433	-0.262866	0.0599324	0.548789	-0.0852974	0.0919737	0.110095	0.0932474	0.178575
LTR62	ERVL	LTR	0.161825	-0.0464265	-0.089344	0.318329	0.0141713	0.0208279	-0.0864703	-0.0437291	0.149679	-0.203535	-0.131887	-0.181882	-0.0847582	-0.226269	-0.102513	-0.167686	-0.162473	0.138092	-0.124113	-0.150987
LTR64	ERV1	LTR	0.263692	0.619314	-0.284368	0.509816	-0.134857	0.324781	-0.273269	0.0616803	-0.352978	-0.0714781	-0.42199	-0.159999	-0.566644	-0.225282	0.236056	-0.00456407	0.129066	-0.128567	0.0709054	-0.0666654
LTR65	ERV1	LTR	0.400475	1.02974	-0.312808	0.406093	0.0883096	0.232751	-0.267934	-0.051391	0.355877	0.123728	-0.414638	-0.0439956	0.516062	-0.371793	0.0844751	0.0724423	0.382704	-0.16287	-0.0304948	-0.117978
LTR66	ERVL	LTR	-0.25129	-1.10714	0.283838	0.130231	-0.346204	-0.164776	-0.016738	-0.158631	-0.628508	-0.149027	0.13991	0.204175	-0.650444	0.238568	0.41273	-0.11718	-0.500941	0.391772	-0.0853235	0.0432755
LTR67B	ERVL	LTR	-0.297502	-0.27611	0.0505556	0.308622	-0.365908	0.0995021	-0.187038	-0.131113	-0.438664	-0.356503	0.016546	-0.149387	-1.3241	-0.0997477	0.187583	-0.264987	-0.160777	0.243599	-0.121067	-0.0953191
LTR68	ERV1	LTR	-0.414845	-0.24107	-0.1161	0.0121973	-0.103574	0.0499504	-0.054845	-0.331053	-0.601453	-0.290384	-0.299808	-0.0017682	-1.16898	-0.556943	-0.0678616	-0.167349	-0.566592	-0.0255887	0.0308819	0.0321359
LTR69	ERVL	LTR	-0.175746	-1.01218	0.237819	0.116006	-0.228409	-0.0425475	-0.255194	-0.717276	-0.341178	-0.106563	-0.0976269	-0.18172	-1.50959	-0.257437	-0.187489	-0.384331	-0.933438	0.413959	-0.11995	-0.0993248
LTR6A	ERV1	LTR	0.146055	-0.571708	0.255809	0.728986	0.787458	0.408055	0.32632	1.27986	-0.00427856	-0.306197	0.0731623	0.350152	0.269289	-0.264877	0.850125	0.00370747	-0.164958	0.717227	0.24378	0.359166
LTR6B	ERV1	LTR	0.306191	-0.305971	0.0944905	0.630118	0.391392	0.559294	-0.27145	-0.0387627	0.0561243	-0.168563	-0.181838	-0.0597283	0.242205	-0.0624333	0.293846	-0.0302258	-0.293611	0.0562182	0.119133	0.104327
LTR7	ERV1	LTR	0.0899311	-0.223563	0.426318	0.275977	0.0806853	0.33243	-0.218263	0.298885	-0.344191	-0.077059	0.116645	0.0316135	-0.836388	0.0451283	0.132737	-0.320522	-0.440927	0.429243	0.0536662	0.0160827
LTR70	ERV1	LTR	-0.321814	-1.06291	0.281695	-0.678455	-0.0809296	-0.327092	0.514411	-0.140164	-0.694722	-0.621195	0.580325	0.0239801	-1.24056	0.927879	-0.249384	-0.389953	-0.545653	0.0800748	-0.0416145	0.144584
LTR71A	ERV1	LTR	-0.149764	-0.333304	0.285067	0.185963	-0.36835	0.0970026	0.01941	-0.218259	-0.405634	-0.623974	0.175189	-0.0992263	-1.3206	-0.0124053	-0.0133753	-0.186448	-0.164146	0.410868	-0.0509266	-0.101308
LTR71B	ERV1	LTR	0.00763159	-1.21748	0.0959504	0.614496	-0.0450001	0.411004	-0.275521	0.320419	-0.383647	-0.819898	-0.196985	-0.179122	0.0051516	-0.518833	0.194428	-0.366684	-0.602285	0.241476	0.140936	-0.0722097
LTR72	ERV1	LTR	-0.236927	0.474063	0.0690148	0.284369	-0.220025	0.287492	-0.375202	-0.212017	-0.248839	-0.221523	0.144738	-0.249044	-1.2981	-0.152424	0.0312206	-0.23333	-0.0983632	0.291528	0.049477	-0.128837
LTR72B	ERV1	LTR	-0.256307	-0.4185	0.0186931	0.223361	-0.440567	0.0528011	-0.283839	-0.342652	-0.338566	-0.300225	0.0203715	-0.37938	-1.41879	-0.19133	0.0389569	-0.445889	-0.399406	0.417661	-0.220608	-0.173053
LTR73	ERV1	LTR	0.213121	0.134771	0.0233282	0.11691	-0.0405831	0.198667	-0.0940733	-0.363569	0.246958	0.81781	-0.0258658	-0.0186882	-0.214733	-0.24373	-0.71916	-0.270504	-0.168044	0.169743	0.0322334	-0.0457925
LTR75	ERVL	LTR	0.189963	-0.362273	0.258175	0.140673	0.237403	0.473447	-0.182335	-0.0117403	0.587419	0.771222	0.189479	-0.226172	-0.445708	0.0407207	-0.217359	-0.353604	0.136116	0.0349882	-0.163755	-0.220375
LTR75B	ERVL	LTR	-0.151352	-0.632943	0.125116	0.251429	0.0789555	0.287991	-0.359349	-0.125146	0.626151	0.720044	0.186255	-0.123919	-1.19143	-0.402125	-0.227549	-0.0866052	0.34518	0.476341	-0.410885	-0.442949
LTR75_1	ERV1	LTR	0.259562	0.545209	0.083006	0.70527	0.129593	0.519742	-0.140337	0.425568	-0.267963	-0.000530386	0.105138	0.00353634	0.605518	-0.360914	0.104829	-0.280517	-0.485021	0.0106733	0.181318	0.0190785
LTR76	ERV1	LTR	1.05111	1.08178	0.670293	-0.273684	0.722283	0.261873	0.457941	-0.375295	0.709391	2.06511	0.513432	-0.292845	1.06403	0.372542	-0.365489	-0.0938496	0.37003	-0.178251	-0.0350906	-0.197918
LTR77	ERV1	LTR	0.128022	-1.02109	0.914134	-0.306699	-0.547957	-0.198495	0.0103616	-0.516516	-0.310892	-0.706514	0.580439	0.0527898	-1.25686	0.767322	-0.144952	-0.394883	-0.580391	-0.0699135	-0.100748	-0.143193
LTR78	ERV1	LTR	-0.333932	-0.146517	-0.0160346	0.36076	-0.399801	0.0478909	-0.287332	-0.145688	-0.559409	-0.52017	-0.0689605	-0.172618	-1.25401	-0.221842	0.286417	-0.310538	-0.0770487	0.188775	-0.114936	-0.108224
LTR78B	ERV1	LTR	-0.336197	-0.385608	0.113633	0.479734	-0.412276	0.0404689	-0.247586	-0.137293	-0.442322	-0.45023	-0.0220834	-0.13456	-1.39476	-0.140792	0.244018	-0.26049	-0.0890425	0.387863	-0.134898	-0.131835
LTR79	ERVL	LTR	-0.386925	-0.166783	-0.0180882	0.201935	-0.290815	0.162874	-0.280672	-0.248881	-0.446543	-0.318266	-0.114257	-0.18346	-1.27154	-0.158627	0.134033	-0.243356	-0.0598614	0.141066	-0.0870634	-0.0977923
LTR7A	ERV1	LTR	-0.256235	-0.0347518	0.462184	0.212635	0.858033	0.412095	-0.328319	-0.101296	0.236478	-0.119696	-0.163519	-0.346907	-0.521442	-0.210136	0.0397188	-0.920714	0.0844643	0.522628	0.07874	0.137545
LTR7B	ERV1	LTR	0.164657	-0.0571816	0.291195	0.45661	-0.115465	0.30161	-0.0766804	-0.131579	-0.255601	-0.104495	0.0585083	-0.075246	-0.646297	0.178423	-0.0352837	-0.237132	-0.169339	0.162486	-0.0191367	-0.000261837
LTR7C	ERV1	LTR	0.242494	-0.426838	0.551255	0.236422	-0.000329146	0.265911	0.0503289	-0.380174	0.0287903	-0.221908	0.394224	-0.0385644	-0.423756	0.230856	-0.228551	-0.211632	-0.49373	0.230565	-0.107865	-0.265641
LTR7Y	ERV1	LTR	0.384883	-0.233416	0.411876	0.438383	0.0627479	0.325738	-0.183552	0.0842783	-0.200399	-0.123937	0.139165	0.0748486	-0.680202	0.0441662	0.184138	-0.334125	-0.216384	0.248634	0.12154	0.0465473
LTR8	ERV1	LTR	0.121062	-0.0443139	0.166111	0.296771	-0.07429	0.110339	-0.0554853	-0.112049	-0.353291	-0.288287	0.120683	-0.0196948	-0.577763	0.149155	0.182865	-0.188387	-0.302271	0.155692	-0.00511006	-0.0158349
LTR80A	ERVL	LTR	-0.661815	-0.414492	-0.134065	-0.365227	-0.287678	-0.106895	-0.115915	-0.598773	-0.423857	0.00140657	-0.129199	0.0224223	-1.05878	-0.246431	-0.0376429	-0.146299	-0.52178	0.0926998	-0.0953085	0.0346645
LTR80B	ERVL	LTR	-0.545277	-0.830845	-0.283187	-0.263971	-0.293777	-0.191352	-0.128542	-0.343638	-0.564443	-0.170125	-0.260874	-0.0281479	-0.907589	-0.512842	-0.138861	-0.235879	-0.387636	0.181421	-0.14176	-0.0114388
LTR81	Gypsy	LTR	-0.220005	0.797881	0.0402721	0.158185	-0.203034	-0.132012	-0.169037	-0.232573	-0.697296	-0.86822	-0.0332625	-0.390367	-1.56421	-0.222595	0.229732	-0.169536	-0.357137	0.0666851	-0.170747	-0.221372
LTR81A	Gypsy	LTR	-0.352464	-0.534353	-0.0688719	0.398892	-0.40555	-0.086553	-0.174694	-0.242874	-0.684522	-0.460293	-0.19622	-0.134167	-1.23142	-0.290851	0.218661	-0.260389	-0.160814	0.0400008	-0.129993	-0.187175
LTR81AB	Gypsy	LTR	-0.277603	0.192877	-0.234264	0.401091	-0.458681	0.132941	-0.298278	-0.507648	-0.716492	-0.481322	-0.340965	-0.0361988	-1.29412	-0.677815	0.309022	-0.429937	-0.237968	-0.00249824	-0.046368	-0.0916552
LTR81B	Gypsy	LTR	-0.492472	-0.25047	-0.102603	0.278113	-0.318775	-0.117586	-0.176616	-0.193291	-0.481559	0.0397139	-0.106391	-0.125663	-1.30751	-0.238192	0.350435	-0.365266	0.0498748	0.195336	-0.0930964	-0.0689794
LTR81C	Gypsy	LTR	-0.317025	-0.561729	0.00941437	0.413919	-0.481125	-0.141758	-0.309404	-0.136992	-0.587714	-0.418579	0.0152174	-0.176655	-1.35023	-0.229527	0.238251	-0.390586	-0.38691	0.126653	-0.169948	-0.244785
LTR82A	ERVL	LTR	-0.377791	-0.372334	-0.282349	-0.0175408	-0.19319	-0.0936096	-0.148567	-0.319604	-0.378957	-0.0223047	-0.153556	-0.0299595	-0.596148	-0.282495	-0.00730208	-0.0636952	-0.190456	0.124626	-0.140066	0.000323627
LTR82B	ERVL	LTR	-0.41587	-0.471764	-0.149537	0.209279	-0.287004	-0.0294254	-0.139727	-0.194913	-0.492177	-0.267552	-0.204439	-0.122752	-1.2395	-0.337025	0.0610094	-0.250821	-0.262773	0.128817	-0.130744	-0.0728472
LTR83	ERVL	LTR	-0.479435	-0.270579	-0.304334	0.190591	-0.244795	0.0534067	-0.138935	-0.24559	-0.655985	-0.295048	-0.433565	-0.226983	-0.908774	-0.389497	0.30732	-0.0492365	-0.130168	0.0896808	-0.129428	-0.0578115
LTR84a	ERVL	LTR	-0.614948	-0.740049	-0.256707	0.240957	-0.196157	0.154477	-0.0844862	0.0605374	-0.596461	-0.210503	-0.31734	-0.1269	-1.12382	-0.385045	0.353368	-0.181115	0.0906399	0.217035	-0.0435965	-0.0391225
LTR84b	ERVL	LTR	-0.46568	-0.10567	-0.164146	0.32208	-0.323376	-0.0115796	-0.256679	-0.337257	-0.621617	-0.219523	-0.280618	-0.196595	-1.16286	-0.230519	0.217994	-0.214116	0.0605119	-0.0502249	-0.0753815	-0.0473935
LTR85a	Gypsy	LTR	-0.396835	-0.571451	-0.229774	0.372018	-0.343587	0.0225047	-0.171813	-0.230449	-0.549302	-0.0379045	-0.260823	-0.0645748	-1.36141	-0.348059	0.28966	-0.301699	-0.15208	0.059377	-0.090293	-0.0265229
LTR85b	Gypsy	LTR	-0.308481	-0.241972	-0.0554281	0.358854	-0.277385	0.0401109	-0.248573	-0.104787	-0.598398	-0.229876	-0.213253	-0.0197601	-1.26187	-0.306176	0.267826	-0.279711	-0.0433096	0.298037	-0.12579	-0.119278
LTR85c	Gypsy	LTR	-0.292522	-0.246759	-0.134609	0.481625	-0.211295	0.169698	-0.26534	-0.218275	-0.530866	-0.275262	-0.237321	-0.0766287	-1.10987	-0.390514	0.208394	-0.245988	-0.0666974	0.177695	-0.121767	-0.130523
LTR86A1	ERVL	LTR	-0.397652	-0.236064	-0.00830579	0.085521	-0.297048	0.10116	-0.083044	-0.432487	-0.506817	-0.271412	-0.179212	-0.0520091	-1.3843	-0.261759	-0.287141	-0.328964	-0.104633	-0.0434594	-0.169757	-0.189836
LTR86A2	ERVL	LTR	-0.408174	-0.054627	-0.208601	0.108849	-0.265616	0.108108	-0.419808	-0.519046	-0.25121	-0.301877	-0.029076	-0.138499	-1.36282	-0.114374	-0.345122	-0.353276	-0.201724	-0.241076	-0.10194	-0.125315
LTR86B1	ERVL	LTR	-0.200865	0.377036	0.103423	-0.0511191	-0.42378	0.143952	-0.240829	-0.343391	-0.215574	-0.102542	-0.0343521	-0.120172	-1.35406	-0.0219447	-0.17302	-0.234964	0.111126	-0.0466519	-0.154484	-0.200039
LTR86B2	ERVL	LTR	-0.263005	-0.724485	-0.047994	-0.00805134	-0.459471	0.00713225	-0.435259	-0.656202	-0.0522678	-0.171104	-0.00536909	-0.0871802	-1.5216	-0.241196	-0.159737	-0.598809	-0.384342	-0.006945	-0.122784	-0.200435
LTR86C	ERVL	LTR	-0.415564	-1.18043	-0.119117	0.256238	-0.456428	-0.170005	-0.390504	-0.436788	-0.372974	-0.33183	-0.169706	-0.200793	-1.42712	-0.195439	0.0963831	-0.073159	-0.334748	0.387678	-0.199429	-0.103836
LTR87	ERVL	LTR	-0.338691	-0.121876	-0.0991666	0.0384472	-0.448852	0.191524	-0.341967	-0.429789	0.00497153	0.411665	-0.162845	-0.106256	-1.49311	-0.120872	-0.48747	-0.258612	0.0517237	-0.179349	-0.148873	-0.122251
LTR88a	Gypsy	LTR	-0.156869	0.187848	0.162228	0.429361	-0.472476	0.0384332	-0.329366	-0.195188	-0.0295369	-0.151118	0.0528989	-0.197664	-1.23316	-0.186283	0.0707872	-0.287104	0.093514	0.322163	-0.160714	-0.184019
LTR88b	Gypsy	LTR	-0.262837	0.476147	0.00134079	0.329925	-0.366845	0.111563	-0.243767	-0.190527	-0.296409	-0.185925	0.00117076	-0.147715	-1.26623	-0.408505	0.117034	-0.321115	-0.109983	0.254325	-0.137816	-0.250297
LTR88c	Gypsy	LTR	-0.31928	-0.00617724	0.024051	0.28561	-0.170495	0.0956062	-0.197317	-0.024831	-0.265729	-0.0621995	-0.0163709	-0.157413	-1.20197	-0.283113	0.191433	-0.316313	-0.256312	0.147399	-0.24192	-0.270702
LTR89	ERVL	LTR	-0.405612	-0.972733	0.0330804	0.333531	-0.39448	-0.168734	-0.268153	-0.124448	-0.375641	-0.0505318	-0.201488	-0.0427749	-1.26078	-0.36332	0.233014	-0.256877	-0.26128	0.363381	-0.225573	-0.0623482
LTR8A	ERV1	LTR	-0.174611	-0.262636	0.276335	0.224892	-0.195069	-0.0322619	-0.0249963	-0.170023	-0.45672	-0.168909	0.0819216	-0.127075	-0.878324	0.281767	0.0730263	-0.278467	-0.340049	0.194011	0.0603482	0.131257
LTR8B	ERV1	LTR	0.0121089	0.947054	0.451929	-0.0465972	-0.0528771	-0.0953478	0.293572	-0.398209	-0.361091	-0.466183	0.443244	-0.193772	-0.944687	0.445304	-0.00498673	-0.267373	-0.413369	0.0399519	-0.0842545	-0.0269514
LTR9	ERV1	LTR	-0.127688	-0.675276	0.443784	0.297693	-0.049862	0.315649	-0.0359891	-0.373273	-0.446218	-0.174028	0.211772	-0.167885	-0.979588	0.105514	0.00952184	-0.349172	-0.381194	0.232107	0.00598137	-0.0459797
LTR90A	LTR	LTR	-0.178393	0.50008	-0.527851	0.0528494	-0.319341	0.172862	-0.114895	-0.561581	-0.626437	-0.208476	-0.55575	-0.154537	-1.36288	-0.419436	0.167313	-0.502917	-0.0550772	-0.303308	-0.108666	-0.205393
LTR90B	LTR	LTR	-0.432097	0.00440582	-0.453386	0.0368512	-0.382874	-0.0752769	-0.254612	-0.518858	-0.588203	0.0502575	-0.517441	-0.21303	-0.721354	-0.507338	0.200816	-0.299279	0.00354223	-0.109881	0.0434456	-0.049641
LTR91	ERVL	LTR	-0.174936	-0.312754	-0.201269	-0.0464892	-0.0344829	0.201632	-0.168763	-0.0628549	-0.0137002	0.15096	-0.222552	-0.00290134	-0.488966	-0.374612	-0.0164486	0.155515	0.183406	0.329547	-0.270794	-0.281589
LTR9A1	ERV1	LTR	-0.247358	-0.754144	0.259417	0.622156	-0.202783	0.114054	-0.0490054	-0.245307	-0.534196	-0.432194	0.175825	-0.00285646	-1.25861	0.0767455	0.126175	-0.309493	-0.328089	0.340449	0.115566	0.0874872
LTR9B	ERV1	LTR	-0.0328923	-0.470498	0.448954	0.405021	0.0992628	0.081809	-0.10183	-0.556575	-0.266214	-0.443897	0.268278	-0.112216	-0.533396	-0.141062	-0.536143	-0.0512338	-0.350809	0.395725	0.148066	0.135529
LTR9C	ERV1	LTR	-0.544426	-0.978109	0.124241	0.228773	0.144534	-0.168437	0.0237159	0.00574974	0.0103721	-0.434852	0.305045	-0.038492	-1.36248	-0.26425	-0.139106	-0.456082	-0.652657	0.303786	0.246893	0.254361
LTR9D	ERV1	LTR	-0.0743385	-0.929679	0.298486	0.487148	-0.16816	0.107617	-0.0122022	-0.334614	-0.413152	-0.2121	0.201534	-0.0639325	-1.16216	-0.0146608	0.0513809	-0.139285	-0.343068	0.356544	0.0659688	0.127695
Looper	PiggyBac	DNA	-0.797509	0.490909	-0.793572	-0.994027	-0.292064	-0.100323	0.0645868	-0.749916	-0.974255	-0.0506076	-0.544908	0.141327	-0.711484	0.173656	-0.257697	-0.0465203	-0.25067	-0.541288	-0.215584	-0.143183
MADE1	TcMar-Mariner	DNA	-0.46711	-0.367246	-0.314735	0.0214937	-0.377249	-0.235636	-0.0871404	-0.404284	-0.740474	-0.186771	-0.24705	-0.0155928	-0.828993	-0.443664	0.0703916	-0.238629	-0.298007	-0.0130031	0.15088	0.191346
MADE2	TcMar-Mariner	DNA	-0.461405	-0.0848434	-0.53891	-0.0748637	-0.240197	-0.175394	-0.170161	-0.191246	-0.545787	-0.211675	-0.5178	-0.0916602	-0.328649	-0.382768	0.168086	-0.133352	0.00499245	-0.0426127	-0.0972933	-0.0940651
MARNA	TcMar-Mariner	DNA	-0.469874	0.351946	-0.634074	-0.0437623	-0.27817	0.022193	-0.124901	-0.259757	-0.623114	-0.158903	-0.480802	-0.09914	-0.823708	-0.297025	0.0991749	-0.0891736	0.125834	-0.13121	-0.0487771	0.0138495
MER101	ERV1	LTR	-0.0885053	-0.303266	0.12985	0.261931	-0.0139631	0.114652	0.146051	-0.209214	-0.460507	-0.289164	-0.0095176	-0.326704	-0.856192	0.0408399	-0.0120078	-0.339468	-0.27893	0.252889	-0.187656	-0.114679
MER101-int	ERV1	LTR	-0.673494	-0.51657	-0.30203	-0.228125	-0.247874	-0.341316	0.188313	-0.388735	-1.09686	-0.384715	-0.310497	0.0940188	-0.456987	0.00648558	0.417592	-0.128792	-0.568035	-0.0360381	-0.0620473	0.043038
MER101B	ERV1	LTR	-0.027176	-0.626079	0.331646	0.00334461	-0.229088	0.193023	0.0415549	-0.646221	-0.493399	-0.144207	0.134152	-0.201147	-1.2624	-0.143448	-0.4521	-0.358156	-0.849743	-0.247713	-0.151867	-0.16307
MER102a	hAT-Charlie	DNA	-0.17731	0.00629407	-0.139464	0.196148	-0.278024	0.149989	-0.232759	-0.140842	-0.377689	-0.109322	-0.364141	-0.119662	-1.01804	-0.233012	0.0287879	-0.200953	0.210562	-0.00146305	0.0706012	0.0566552
MER102b	hAT-Charlie	DNA	-0.179753	0.262568	-0.21144	0.248765	-0.292057	0.196499	-0.289656	-0.0330434	-0.311131	-0.145044	-0.343677	-0.146786	-0.941544	-0.299357	-0.0191343	-0.215786	0.268748	-0.000587322	0.104891	0.0904261
MER102c	hAT-Charlie	DNA	-0.371597	0.159128	-0.181322	0.189822	-0.299248	0.15969	-0.220893	-0.0545903	-0.455625	-0.16999	-0.254371	-0.100057	-1.1419	-0.135746	-0.0306974	-0.099407	0.206925	0.0595072	0.0182306	0.000331555
MER103C	hAT-Charlie	DNA	-0.482197	-0.107144	-0.436231	0.152776	-0.317146	0.0171627	-0.152982	-0.226257	-0.724405	-0.243689	-0.379534	-0.0837801	-1.09155	-0.373617	0.233516	-0.240824	-0.0454425	0.00307171	-0.0788704	-0.0373786
MER104	TcMar-Tc2	DNA	-0.608681	-0.000838249	-0.558109	-0.236512	-0.277832	-0.191754	-0.151521	-0.266692	-0.570317	-0.0546117	-0.546993	-0.0169168	-0.530259	-0.325828	0.198172	-0.200119	-0.0737691	-0.181842	-0.152549	0.0324128
MER105	hAT-Charlie	DNA	0.15905	0.479871	-0.440516	-0.165587	-0.0431765	0.287772	-0.238886	-0.458421	-0.0256851	-0.0471067	-0.326547	-0.0532376	-0.0625181	0.000605658	-0.326966	0.0100512	0.322027	-0.297642	-0.0536865	-0.118956
MER106A	hAT-Charlie	DNA	-0.432552	-0.204094	-0.407206	-0.0563245	-0.335147	-0.185675	-0.160463	-0.286627	-0.672809	-0.297539	-0.486573	-0.142158	-0.682071	-0.328493	0.177876	-0.110067	0.0489068	0.216004	0.197614	0.279926
MER106B	hAT-Charlie	DNA	-0.625168	-0.435175	-0.466261	0.0203653	-0.55512	-0.276796	-0.166763	-0.406829	-0.786311	-0.260104	-0.584125	0.0366234	-0.501586	-0.197304	0.246194	-0.0339192	0.169518	0.0116035	-0.0591584	0.025073
MER107	hAT-Charlie	DNA	0.0351327	0.165971	-0.214677	-0.0101895	-0.130079	0.454681	-0.227618	-0.396173	-0.454079	-0.132674	-0.143368	0.0681561	-0.558011	-0.156304	0.193766	-0.304995	0.609029	-0.0967814	-0.113522	-0.245365
MER110	ERV1	LTR	-0.412766	-0.665765	-0.273639	0.0560778	-0.18988	-0.10897	-0.0535493	-0.26883	-0.497675	-0.234663	-0.163077	0.00131317	-0.44891	-0.377148	0.125758	-0.247987	-0.310558	0.172418	-0.177974	-0.0241206
MER110-int	ERV1	LTR	-0.430236	-0.19554	-0.281823	-0.0758938	-0.202376	-0.108359	-0.0177115	-0.159223	-0.664957	-0.429977	-0.0982074	-0.0368872	-1.13033	-0.140058	0.120877	-0.305301	-0.284959	0.051061	0.0230947	0.069131
MER110A	ERV1	LTR	-0.165595	-0.392295	-0.219792	0.168228	-0.261067	-0.12116	-0.138616	-0.256651	-0.477127	-0.451107	-0.332867	-0.00545827	-0.319201	-0.243549	0.302925	-0.351676	-0.205409	0.151091	-0.219971	-0.15472
MER112	hAT-Charlie	DNA	-0.311791	0.370605	-0.676714	-0.111655	-0.197457	-0.01345	-0.140102	-0.052304	-0.576727	-0.13122	-0.57653	-0.0872163	-0.340131	-0.401779	0.0831986	0.0265075	0.0539679	-0.156504	-0.025564	0.0199893
MER113	hAT-Charlie	DNA	-0.276468	0.16764	-0.453878	0.260408	-0.317678	-0.00847783	-0.253484	-0.0300464	-0.533639	-0.0802814	-0.690097	0.000435235	-0.220528	-0.406642	0.449652	-6.9448e-05	0.129849	0.0458916	-0.0409901	-0.0720756
MER113A	hAT-Charlie	DNA	-0.11696	0.318247	-0.541061	0.0976183	-0.364493	-0.139287	-0.244563	-0.0262222	-0.381096	-0.2006	-0.606082	0.00186876	0.18068	-0.379017	0.349773	-0.0681776	0.120533	-0.175659	0.0480007	0.0675996
MER113B	hAT-Charlie	DNA	-0.351943	0.112623	-0.589206	-0.0850521	-0.56038	-0.332595	-0.196144	-0.314029	-0.77053	-0.344265	-0.797336	-0.0311636	-0.387456	-0.497759	0.269404	-0.25276	-0.298842	-0.167067	-0.0473935	0.116296
MER115	hAT-Tip100	DNA	-0.355891	-0.525871	0.206064	0.246506	-0.415885	0.0164649	-0.320361	0.00993753	-0.294878	-0.444316	0.0749343	-0.274177	-1.29523	-0.0811618	0.12684	-0.347886	-0.110608	0.173852	-0.0708914	-0.0433399
MER117	hAT-Charlie	DNA	-0.31537	0.153084	0.0175393	0.347787	-0.371097	0.0265246	-0.262945	-0.156033	-0.37377	-0.237734	-0.0390873	-0.123856	-1.64151	-0.194762	-0.107627	-0.249279	0.0889757	0.268869	-0.31836	-0.282377
MER119	hAT-Charlie	DNA	-0.305483	0.765869	-0.317318	-0.0767498	-0.357451	-0.0263301	-0.127521	-0.402569	-0.793537	-0.18159	-0.330224	-0.0838426	-1.13717	-0.32161	-0.31389	-0.185853	0.062728	-0.175592	0.00571466	0.0189868
MER11A	ERVK	LTR	-0.0358845	-0.901617	0.948089	-0.0776028	0.0994903	-0.558246	0.598618	0.108786	-0.436287	-0.395544	1.01887	0.163778	-1.13927	0.865999	-0.129139	-0.394677	-0.647462	-0.0458823	0.129879	0.28906
MER11B	ERVK	LTR	-0.166726	-0.944365	0.716605	0.0342269	0.095696	-0.386305	0.542258	-0.256574	-0.448997	-0.277086	0.713311	0.0730691	-1.12556	0.478674	-0.356428	-0.267832	-0.659733	-0.086455	0.171262	0.322446
MER11C	ERVK	LTR	-0.194586	-0.826465	0.526867	0.210951	0.104023	-0.343309	0.480959	0.412125	-0.525459	-0.369211	0.486518	0.133109	-1.13901	0.300318	0.0278338	-0.269	-0.636558	-0.0230067	0.247189	0.365314
MER11D	ERVK	LTR	-0.159102	-1.24924	0.777763	-0.074836	0.0393729	-0.201729	0.360603	-0.351969	-0.326469	-0.412768	0.689348	-0.00339945	-1.16265	0.401924	-0.329626	-0.216567	-0.429371	0.0195627	-0.027661	0.0968431
MER121	hAT	DNA	-0.132263	0.568026	-0.567391	0.249653	-0.345892	-0.0696007	-0.156464	-0.346987	-0.762819	-0.116862	-0.405393	0.0665152	-1.15562	-0.541113	0.518882	-0.227099	0.0688099	0.124317	0.06951	0.0630741
MER121B	hAT	DNA	0.0669409	0.110301	-0.462017	0.342702	-0.471914	-0.189289	-0.486737	-0.41555	-1.14446	-0.0422763	-0.156804	0.261804	-0.270139	-0.919902	0.0913405	0.0123071	0.314071	-0.177862	0.131683	0.282187
MER123	DNA	DNA	-0.965899	-0.762194	-0.972476	-0.380285	-0.758722	-0.562664	-0.572413	0.00698998	-0.596111	1.22929	-1.2099	0.0232724	-1.51386	-1.14972	0.115604	-0.200725	-1.01207	-0.0526559	0.214037	-0.0686858
MER124	DNA	DNA	-0.555248	-0.229518	-0.496776	0.14704	-0.35686	-0.113253	-0.210097	-0.0302509	-0.439575	0.217722	-0.475585	0.0775261	-0.965597	-0.444314	0.369998	-0.169425	-0.418113	-0.0584413	-0.199059	-0.263682
MER125	DNA	DNA	-0.327221	0.782975	-0.729648	-0.144992	-0.272292	-0.417563	-0.227984	-0.431016	-0.264207	0.75994	-0.633742	0.0965312	-0.973301	-0.716149	0.584374	-0.32809	-0.322734	0.0165116	-0.25043	0.269385
MER126	DNA	DNA	-0.568378	0.514578	-0.719183	-0.175267	-0.315345	0.306267	-0.366666	-0.469042	0.237807	1.44607	-0.544918	-0.201099	-0.760254	-0.615127	0.0169315	0.0760976	-0.107753	0.159825	-0.0774527	-0.208186
MER127	TcMar-Tigger	DNA	-0.588476	0.0617427	-0.705111	-0.00433352	-0.152593	0.0612392	-0.275656	0.230826	-0.00916897	0.324045	-0.796555	0.0884795	-0.938791	-0.732329	0.123718	-0.11453	-0.152894	0.108023	-0.0939837	0.108382
MER129	LTR	LTR	-0.420999	-0.286506	-0.402295	0.108967	-0.0659805	0.365998	-0.300708	-0.221246	-0.213691	0.134518	-0.415157	-0.0539461	-0.872039	-0.660824	0.114277	0.0625315	0.646076	0.0417698	0.0616569	-0.39343
MER130	DNA	DNA	-0.189614	0.786558	-0.200681	-0.186816	-0.218827	0.240965	-0.241066	-0.411136	0.167548	0.442725	-0.183741	0.0333815	-1.38865	-0.341664	-0.147797	0.361639	0.475268	0.279724	-0.25135	-0.265174
MER131	DNA	DNA	-0.296773	0.202681	-0.527969	0.0419225	-0.10052	0.25009	-0.23284	-0.114766	-0.118896	0.478908	-0.581072	0.179308	-0.0748405	-0.690808	0.040356	0.109354	0.372526	0.157597	0.18059	0.120147
MER132	TcMar-Pogo	DNA	-0.378936	-0.495931	-0.317761	-0.0815202	0.172035	0.387226	0.31229	-0.698237	-0.156791	0.42455	-0.526091	-0.439181	-1.67859	-1.20498	-0.662552	0.404657	0.527392	0.100717	0.234754	-0.0304995
MER133A	DNA	DNA	-0.527057	-0.824978	-0.576131	0.303687	-0.231977	-0.0191707	-0.372543	-0.557393	0.517413	1.63509	-0.766918	-0.236758	-1.48098	-0.675952	0.260218	-0.275868	-0.400116	0.396556	-0.0351383	-0.697957
MER133B	DNA	DNA	0.0149644	-0.698684	-0.485788	-0.520355	-0.617106	0.388226	0.00440366	-0.707047	-0.329093	0.0599913	-0.539955	-0.0959346	-1.66122	-1.38881	-0.644932	0.422248	-0.630663	-0.65047	0.0788852	0.185872
MER134	DNA	DNA	-0.838154	-0.433054	-0.33302	-0.016253	-0.609271	-0.470118	-0.347666	-0.853826	-0.805149	0.0211376	-0.831352	-0.13362	-1.181	-0.835905	-0.290689	-0.30121	-1.1876	-0.619993	-0.241873	-0.249858
MER135	DNA	DNA	-0.217633	0.23368	-0.206659	-0.140374	-0.152172	0.281931	-0.221837	-0.321598	-0.156436	0.44043	-0.398773	0.0200308	-0.887289	-0.603095	-0.105689	-0.0118492	0.214523	0.360033	-0.0476546	-0.157394
MER136	DNA	DNA	-0.886186	0.656008	-0.193707	-0.405384	-0.439729	-0.817034	-0.210459	-0.38506	-0.484114	-0.194588	-1.44313	0.165116	-0.823972	-0.852019	0.488538	-1.20198	-0.0559895	0.301157	0.313366	0.192066
MER1A	hAT-Charlie	DNA	-0.263299	-0.391619	0.44147	0.0339711	-0.381977	-0.211846	0.126135	-0.207975	-0.207737	0.0164087	0.572508	0.0373705	-1.52215	0.523597	-0.441726	-0.310904	-0.195075	0.180067	-0.083489	-0.0132319
MER1B	hAT-Charlie	DNA	-0.21262	-0.00766087	0.527335	0.0370398	-0.200432	0.0763834	-0.00375825	-0.182107	0.0719436	-0.196128	0.647254	-0.1166	-1.34944	0.505587	-0.471375	-0.284423	-0.122407	0.0994519	-0.0841759	-0.0706288
MER2	TcMar-Tigger	DNA	-0.700817	-0.293688	-0.371454	-0.463292	-0.418849	-0.200422	-0.031843	-0.420718	-0.763363	-0.0809476	-0.382287	0.0852494	-0.689239	-0.0571411	-0.13731	-0.129006	-0.168539	-0.162059	0.0073977	0.0991537
MER20	hAT-Charlie	DNA	-0.156048	0.129076	-0.059685	0.20772	-0.263952	0.116074	-0.267616	-0.0741301	-0.0914539	-0.117218	-0.0745433	-0.0725247	-0.878482	-0.225503	-0.133203	-0.199201	0.177851	0.150782	-0.0540108	-0.0667281
MER20B	hAT-Charlie	DNA	-0.411951	-0.183658	-0.363546	-0.071083	-0.375055	-0.191085	-0.0995889	-0.247987	-0.571994	-0.117945	-0.444963	-0.0331038	-0.851054	-0.368548	0.0161991	-0.252399	-0.109507	-0.0907384	-0.0595684	-0.00682538
MER21-int	ERVL	LTR	-0.365525	-0.807765	0.0254855	0.304188	-0.34968	-0.145075	-0.216544	-0.260912	-0.625734	-0.623147	0.0243113	-0.224227	-1.3937	-0.0272396	0.145682	-0.299371	-0.398411	0.209947	-0.098911	-0.0297429
MER21A	ERVL	LTR	-0.317328	-0.254045	0.210496	0.120506	-0.368388	0.162798	-0.158875	-0.276259	-0.522991	-0.62574	0.133039	-0.268382	-1.41945	0.0934575	-0.0812515	-0.354415	-0.0204965	-0.0328858	-0.00579406	0.000599006
MER21B	ERVL	LTR	-0.20228	-0.104231	0.222935	0.211209	-0.235752	0.0259669	-0.127481	-0.293922	-0.374097	-0.496219	0.187907	-0.212168	-1.26873	0.0580559	-0.116552	-0.294415	-0.124494	0.155875	0.0135306	0.0421317
MER21C	ERVL	LTR	-0.254686	0.24498	0.16486	0.235878	-0.244959	0.0624729	-0.143149	-0.29556	-0.410453	-0.484303	0.10213	-0.182256	-1.15702	0.0774858	-0.106528	-0.363776	-0.253192	0.169171	0.00172033	-0.0120065
MER2B	TcMar-Tigger	DNA	-0.59383	-0.246347	-0.271836	-0.274752	-0.446899	-0.145174	-0.0506711	-0.411203	-0.827661	-0.238651	-0.29404	-0.0413009	-1.1103	-0.0926486	-0.378475	-0.324947	-0.288164	-0.123923	0.099044	0.230001
MER3	hAT-Charlie	DNA	-0.487897	0.0349829	-0.27748	-0.0998818	-0.427549	-0.053542	-0.21712	-0.258989	-0.585322	-0.211535	-0.54581	-0.0334123	-0.82478	-0.334162	-0.309876	-0.186095	-0.0427697	-0.0307606	-0.00818817	0.00830402
MER30	hAT-Charlie	DNA	-0.234366	0.0649606	-0.233895	0.0286944	-0.267462	0.0343868	-0.0870224	-0.333289	-0.630742	-0.220317	-0.206141	0.01958	-0.82656	-0.0735044	-0.0895937	-0.115608	-0.0358449	-0.0940663	0.302343	0.350197
MER30B	hAT-Charlie	DNA	0.0153183	-0.218442	0.345315	0.364299	-0.12057	-0.483323	0.259899	0.20901	-0.926259	-0.669724	0.0626705	-0.329149	-1.01417	0.0136743	-0.00750623	-0.0254815	-0.0803071	0.550563	0.393766	0.507176
MER31-int	ERV1	LTR	-0.675936	-0.44544	-0.434666	0.00792196	-0.36454	-0.152545	0.0208572	-0.259761	-1.09999	-0.46956	-0.506051	0.0248055	-0.962749	-0.261913	0.463898	-0.145214	-0.345466	0.0107845	-0.059788	-0.0843649
MER31A	ERV1	LTR	-0.153391	-0.138118	-0.0859367	0.270809	-0.298948	0.0113172	-0.216355	-0.19877	-0.31678	-0.276381	-0.0546861	-0.159729	-0.773535	-0.20079	0.0674712	-0.173345	0.0738696	0.191924	-0.0549477	-0.126672
MER31B	ERV1	LTR	-0.206459	-0.150156	-0.0281519	0.120671	-0.293879	0.074065	-0.183264	-0.312186	-0.400719	-0.331637	-0.0169679	-0.144429	-0.558369	-0.0740303	0.172013	-0.239831	-0.0907164	0.043098	-0.136318	-0.0437236
MER33	hAT-Charlie	DNA	-0.425226	0.138725	-0.508877	-0.232411	-0.549361	-0.247598	-0.104434	-0.28849	-0.657245	-0.0416048	-0.696948	0.0778839	-0.20653	-0.325994	-0.0877696	-0.0762575	-0.106002	-0.114955	0.0664756	0.0724512
MER34	ERV1	LTR	-0.323045	-0.504261	-0.341927	0.0525419	-0.250044	0.0809439	-0.208661	-0.375313	-0.46341	-0.0946871	-0.205061	-0.0344706	-0.431534	-0.0772293	0.343468	-0.100843	-0.173847	0.0139217	-0.016178	0.00662812
MER34-int	ERV1	LTR	-0.451944	-0.380066	-0.0501703	0.383079	-0.253008	0.233134	-0.205931	-0.348866	-0.774646	-0.801666	-0.174086	-0.168376	-1.35263	-0.183187	0.37981	-0.380311	-0.632921	0.175767	-0.0747323	-0.00646013
MER34A	ERV1	LTR	-0.344895	-0.128206	-0.190492	0.233952	-0.208872	0.115397	0.0181133	-0.272278	-0.637226	-0.327826	0.0380664	-0.0453945	-0.895402	0.0562795	0.416586	-0.174123	0.00205212	0.0415999	0.0378819	0.0754964
MER34A1	ERV1	LTR	-0.30843	-0.508001	-0.111171	0.319507	-0.0900103	0.193341	-0.0768012	-0.434676	-0.542732	-0.213775	-0.173543	-0.173454	-1.01882	-0.133296	0.337655	-0.11528	-0.0553282	0.167794	-0.032463	0.100893
MER34B	ERV1	LTR	-0.373929	-0.213198	-0.268908	0.194575	-0.123279	0.471987	-0.149804	-0.338307	-0.555114	-0.171737	-0.352629	-0.0318453	-0.740826	-0.328708	0.329369	-0.295048	0.0094455	0.0505472	0.00997041	-0.0799322
MER34B-int	ERV1	LTR	-0.896292	-0.861625	-0.54533	-0.0770638	-0.290852	-0.0639454	0.00875689	-0.394401	-1.15404	-0.482403	-0.455392	0.0040685	-0.971494	-0.286659	0.336913	-0.0665806	-0.355543	-0.0203342	-0.0196184	0.0530882
MER34C	ERV1	LTR	-0.244691	-0.291102	-0.313178	-0.0839371	-0.316049	-0.0362614	-0.100412	-0.474821	-0.550576	-0.409614	0.00419965	-0.0948479	-0.880691	-0.200692	0.0662192	-0.471699	-0.342894	0.124551	0.0761842	0.064302
MER34C2	ERV1	LTR	0.292815	-0.051892	-0.0825001	0.461815	0.143012	0.111364	-0.0927638	0.197684	0.025311	-0.365512	-0.306715	-0.00823924	0.763086	-0.0624535	0.471724	0.091346	-0.0451509	0.065206	0.0925424	0.130857
MER34C_	ERV1	LTR	-0.466299	-0.370567	-0.206717	0.219166	-0.203772	-0.0365027	-0.0378522	-0.389284	-0.857023	-0.256781	-0.177579	-0.102942	-1.02278	-0.0811616	0.460133	-0.129864	-0.224541	0.190957	0.0302875	0.0718179
MER34D	ERV1	LTR	-0.0544751	-0.572372	-0.193285	0.378564	-0.118686	-0.00731688	-0.220207	-0.128447	-0.204483	0.20495	-0.170642	0.043098	-0.127557	-0.454583	0.152354	-0.103055	-0.0859703	0.217421	0.354835	0.131963
MER39	ERV1	LTR	-0.343726	-0.213011	-0.116788	0.236316	-0.312873	0.119689	-0.204101	-0.175035	-0.62501	-0.108772	-0.128668	-0.0230745	-1.10406	-0.165272	0.170673	-0.38562	-0.256069	0.105392	-0.0412073	-0.011535
MER39B	ERV1	LTR	-0.278885	-0.359837	0.0603288	0.284571	-0.0560758	0.194085	0.0300076	0.0308429	-0.586604	-0.247992	-0.0880045	-0.023599	-1.04186	-0.119565	0.166143	-0.320409	-0.26216	0.474439	0.076418	0.108416
MER4-int	ERV1	LTR	-0.384117	-0.947449	0.146746	-0.264915	-0.0283665	-0.456722	0.48091	-0.344812	-1.07337	-0.367579	0.083965	0.0911145	-0.833783	0.419079	0.348744	-0.155453	-0.586538	-0.104877	-0.0388087	0.0639181
MER41-int	ERV1	LTR	-0.464987	-0.49198	0.212559	-0.0943149	0.0494878	-0.384656	0.469276	-0.322924	-0.867534	-0.548303	0.417027	-0.057015	-0.937678	0.50571	0.140379	-0.196321	-0.562338	-0.0899917	-0.0346377	0.0746577
MER41A	ERV1	LTR	-0.105867	0.458222	-0.0484755	0.157839	-0.246404	0.0499613	-0.209355	-0.162384	-0.388433	-0.240638	0.102132	0.0213674	-0.988418	-0.0449922	-0.136735	-0.26821	-0.142827	0.179834	-0.0480117	-0.0569302
MER41B	ERV1	LTR	-0.053772	0.526828	-0.0101816	0.171237	-0.294976	0.0322235	-0.155029	-0.186183	-0.410224	-0.176299	0.0486996	-0.0305358	-0.924254	-0.203979	-0.370735	-0.346763	-0.184693	0.206217	-0.0863736	-0.0641491
MER41C	ERV1	LTR	0.151005	0.0891259	-0.129945	0.183833	-0.233822	0.00930304	-0.222374	0.0855391	-0.404258	-0.147096	-0.182049	0.115127	-0.138351	-0.155295	0.211239	-0.0730329	-0.15092	0.161479	0.0137506	-0.0522352
MER41D	ERV1	LTR	-0.20271	-0.748543	-0.0144172	0.379325	-0.347694	-0.234087	-0.21467	-0.145915	-0.501386	-0.527101	-0.13009	-0.191739	-0.698202	0.0818845	0.25336	-0.164587	-0.226619	0.181176	-0.115533	-0.227928
MER41E	ERV1	LTR	-0.339285	-0.399798	-0.0516268	0.489378	-0.3014	-0.142409	-0.176483	0.788908	0.0327588	0.231722	0.0677198	0.117202	-1.03765	-0.115116	0.0728281	-0.328327	-0.135221	0.375836	-0.0650324	0.0413478
MER41G	ERV1	LTR	0.596136	0.126629	0.209862	0.451537	-0.195557	-0.0903815	-0.126325	0.201835	-0.422486	-0.396597	0.245336	0.150137	-0.477197	-0.138548	0.211724	0.00604181	-0.530231	0.124294	0.0606616	0.117731
MER44A	TcMar-Tigger	DNA	-0.596029	-0.212327	-0.445198	-0.426918	-0.475385	-0.219446	-0.109731	-0.42828	-0.923996	-0.179919	-0.587535	0.095183	-0.458002	-0.0766219	0.0154466	-0.136027	-0.193322	-0.174207	0.0850755	0.0961719
MER44B	TcMar-Tigger	DNA	-0.195611	0.938046	-0.203367	-0.300275	-0.503502	-0.193363	-0.177603	-0.490807	-0.635647	-0.214674	-0.15887	0.0287978	-1.34276	-0.111227	-0.462624	-0.216306	-0.101558	-0.0622681	-0.0291174	0.0353265
MER44C	TcMar-Tigger	DNA	-0.137439	0.947163	-0.168147	-0.232253	-0.226394	0.0423656	-0.00101287	-0.216317	-0.417698	-0.179893	-0.0866372	-0.128161	-1.39205	-0.023865	-0.35057	-0.195934	-0.105244	-0.140052	-0.0764063	-0.0368413
MER44D	TcMar-Tigger	DNA	-0.277214	0.809871	-0.0820998	-0.468897	-0.477792	-0.380644	-0.126737	-0.403195	-0.620461	-0.172519	-0.0205496	0.0600637	-1.5476	-0.00615442	-0.468892	-0.284712	-0.345986	0.0545507	-0.2881	-0.0876941
MER45A	hAT-Tip100	DNA	-0.0135439	0.183725	-0.0437604	0.397272	-0.364502	-0.00349787	-0.310542	0.138115	-0.24158	-0.0599598	-0.162361	-0.0233597	-0.955532	-0.420304	0.18299	-0.280506	0.0880166	0.144369	0.113923	0.0876881
MER45B	hAT-Tip100	DNA	-0.356739	-0.152896	-0.154928	0.126708	-0.393433	-0.0962479	-0.0975715	-0.140256	-0.42626	-0.144611	-0.290538	-0.0843697	-1.17536	-0.339992	0.207866	-0.175326	-0.457179	0.0837305	-0.145879	-0.113016
MER45C	hAT-Tip100	DNA	-0.269867	-0.564962	0.405548	0.266201	-0.351186	0.0661686	-0.350308	0.199441	-0.184964	-0.398663	0.206199	-0.147013	-1.54322	-0.191245	0.0269127	-0.276119	0.0137829	0.534656	0.106533	-0.000115122
MER45R	hAT-Tip100	DNA	-0.576301	-0.880052	-0.245203	-0.0320283	-0.443148	-0.22331	0.0676977	-0.381692	-0.94228	-0.359445	-0.354253	0.0465309	-1.07299	-0.314395	0.176771	-0.20284	-0.0899683	0.00120176	-0.0129899	0.0593295
MER46C	TcMar-Tigger	DNA	-0.37175	-0.105699	-0.498873	-0.0143715	-0.210822	-0.0854655	-0.137326	-0.0845091	-0.569976	-0.2032	-0.546554	-0.0217761	-0.26791	-0.284208	0.254692	-0.0335879	-0.0345669	-0.150313	0.0811367	0.131978
MER47A	TcMar-Tigger	DNA	-0.743314	-0.673052	-0.382141	-0.204281	-0.30017	-0.226804	-0.0376727	-0.237874	-0.789753	-0.248822	-0.315572	-0.00346723	-1.1151	-0.238949	-0.0332415	-0.238141	-0.146253	-0.0737475	-0.166286	-0.160011
MER47B	TcMar-Tigger	DNA	-0.563562	-0.705839	-0.120212	-0.00406174	-0.295311	-0.0802036	-0.211716	-0.394187	-0.451923	-0.431072	-0.0697532	-0.0890921	-1.51894	-0.0553571	-0.269453	-0.0889771	0.040529	0.15552	-0.0701796	-0.0534563
MER47C	TcMar-Tigger	DNA	0.109098	-0.340466	0.175058	-0.211321	-0.0482066	-0.446345	0.108515	-0.162344	-0.255327	-0.168794	0.15457	-0.0257337	-0.425926	-0.19684	-0.000701419	-0.219449	-0.544738	0.271444	-0.0193176	0.0765233
MER48	ERV1	LTR	0.040431	-0.29648	0.684486	0.110521	-0.322418	0.178306	-0.0678106	-0.16464	-0.196022	-1.05473	0.723948	-0.333871	-1.49404	0.507528	-0.135869	-0.623065	0.168955	0.0738061	-0.0384901	-0.0104999
MER49	ERV1	LTR	-0.32721	-0.0851663	-0.0209826	0.33672	-0.199433	-0.00828999	-0.0791237	-0.0783178	-0.361682	-0.304982	-0.0289011	-0.0490482	-0.845433	-0.336847	0.0800187	-0.349218	-0.288237	0.188273	-0.0559858	-0.018594
MER4A	ERV1	LTR	0.0191774	0.206286	-0.060962	0.404537	-0.170009	0.000149892	-0.156401	-0.182157	-0.139431	-0.212409	-0.126302	-0.0242549	-0.506366	-0.202243	0.113424	-0.245787	-0.330452	0.105505	-0.0591601	0.0166153
MER4A1	ERV1	LTR	-0.111111	-0.683892	0.180653	0.383406	-0.0928426	0.0166352	-0.044641	-0.110885	-0.294622	-0.327416	0.0391689	-0.0584831	-0.880328	-0.0987477	0.026668	-0.32622	-0.413505	0.109461	-0.117175	-0.0748391
MER4A1_	ERV1	LTR	-0.183535	0.0574272	-0.0174839	0.332902	-0.167435	0.188877	-0.172815	-0.176377	-0.416871	-0.253502	-0.0618558	-0.111778	-1.06517	-0.243324	0.0192269	-0.206049	-0.291134	0.223533	-0.189856	-0.184575
MER4B	ERV1	LTR	-0.235894	-0.0777806	-0.0414897	0.326623	-0.257841	-0.125615	-0.139868	-0.238836	-0.50361	-0.25764	-0.120936	0.00943105	-0.899733	-0.0645981	0.130638	-0.349038	-0.247446	0.153017	-0.0189931	0.0349648
MER4B-int	ERV1	LTR	-0.473248	-0.779896	-0.0229272	0.0205311	-0.124837	-0.146866	0.267495	-0.393795	-0.865499	-0.332798	-0.195535	-0.0410098	-1.05922	-0.115712	0.356927	-0.124845	-0.280153	0.0593721	0.0773425	0.134544
MER4C	ERV1	LTR	0.0946694	0.183098	-0.247177	0.351129	-0.0217692	0.182905	-0.161627	-0.10747	-0.366889	-0.216604	-0.351471	-0.120758	-0.340676	-0.185244	0.348402	-0.252229	0.00323595	-0.130338	-0.0660533	0.00666497
MER4CL34	ERV1	LTR	-0.0599384	-0.100665	-0.0915184	0.473998	-0.0472697	0.309917	-0.148739	-0.061512	-0.306707	-0.298203	-0.0960677	-0.0128328	-0.739246	-0.27936	0.294059	-0.248476	-0.13308	0.103375	-0.0422865	-0.0982828
MER4D	ERV1	LTR	-0.238837	-0.271593	-0.0655344	0.241546	-0.0554468	0.180173	-0.00731703	-0.406796	-0.521336	-0.176308	-0.155	-0.157683	-0.148706	-0.127448	0.2324	-0.251049	-0.254102	0.169884	0.0490072	0.117924
MER4D0	ERV1	LTR	-0.427208	-0.870904	0.0230003	0.245651	-0.0828724	0.0229123	-0.109573	-0.378589	-0.576155	-0.182556	-0.0830708	0.0151349	-0.877028	-0.160442	0.0373471	-0.201096	-0.617177	0.26528	0.109671	0.084481
MER4D1	ERV1	LTR	-0.236644	-0.257954	-0.0727928	0.360333	-0.097067	0.0153712	-0.10811	-0.182736	-0.421625	-0.0832214	-0.153883	0.0205639	-0.513165	-0.156129	0.197904	-0.302444	-0.295478	0.151164	0.0594514	0.0737724
MER4E	ERV1	LTR	-0.0368103	-0.483952	-0.0843368	0.338598	-0.0480784	0.203731	-0.118689	-0.28391	-0.559107	-0.185427	-0.325038	0.0178751	-0.357452	-0.2504	0.27322	-0.18629	-0.263204	0.191753	0.144548	0.156025
MER4E1	ERV1	LTR	-0.234508	-0.269243	-0.0953426	0.308238	-0.123276	0.0455325	-0.0665641	-0.315846	-0.692596	-0.305526	-0.287186	0.0412317	-0.520018	-0.0907543	0.256668	-0.284782	-0.440412	0.115012	0.228935	0.261251
MER50	ERV1	LTR	-0.135589	-0.855872	0.391425	0.206419	-0.366061	-0.0307238	-0.153386	-0.221103	-0.24154	-0.544449	0.412586	-0.186246	-1.3817	0.0348494	-0.0530445	-0.256025	-0.335594	0.306148	-0.0975159	-0.0273203
MER50-int	ERV1	LTR	-0.154459	-1.09387	0.566553	0.055722	-0.0959165	-0.404354	0.204069	-0.381734	-0.659194	-0.848869	0.454671	-0.221381	-1.20295	0.353062	0.0829243	-0.19229	-0.686341	0.314304	-0.0941783	-0.0259766
MER50B	ERV1	LTR	-0.160515	-0.254196	0.314121	0.259805	-0.384404	-0.0844076	-0.153478	-0.175349	-0.387337	-0.61922	0.183278	-0.135145	-1.35848	-0.0340261	-0.0107013	-0.350349	-0.418157	0.451925	-0.0979315	0.00109452
MER50C	ERV1	LTR	0.739085	0.689814	0.573154	-0.411221	0.125696	0.271868	0.125156	-0.307275	0.0233665	0.586841	0.487266	-0.269874	-0.823411	0.22585	-0.763723	0.390312	0.17022	0.122589	-0.0611784	-0.0189754
MER51-int	ERV1	LTR	-0.221638	-1.08229	0.138172	-0.225169	-0.0569436	-0.15564	0.24554	-0.39057	-0.833229	-0.4767	0.129145	-0.00638052	-1.04496	0.230835	0.323313	-0.318933	-0.566612	-0.0813589	0.0592585	0.102575
MER51A	ERV1	LTR	0.330541	-0.244929	0.173819	0.194791	0.0174323	0.24331	0.0102961	-0.171513	-0.312781	-0.294288	0.3538	-0.0630968	-0.673105	0.206841	-0.180365	0.159092	0.07623	0.103293	-0.0397667	-0.107761
MER51B	ERV1	LTR	0.297562	0.200944	0.0365838	0.094791	-0.0500306	0.162987	-0.135621	-0.215845	-0.295416	-0.357391	0.00777685	-0.146203	-0.334608	-0.033699	0.189685	-0.0241076	-0.0837242	0.0766533	0.173491	0.122213
MER51C	ERV1	LTR	0.936705	-0.503248	0.287346	0.14476	0.557158	1.08222	-0.199954	-0.152774	1.19214	-0.276839	0.489718	0.10087	1.30119	-0.134893	0.195217	0.321555	0.153531	0.075753	0.231571	-0.114348
MER51D	ERV1	LTR	1.30661	0.914851	0.161249	1.20293	0.435174	0.619012	-0.145169	0.0285576	1.12807	1.74359	-0.201228	0.0527421	1.06905	-0.457263	0.253514	0.274633	-0.00743193	0.590561	-0.000849002	-0.229368
MER51E	ERV1	LTR	-0.428996	-0.705552	0.528772	0.642561	0.0888744	0.376614	-0.0838699	-0.0226327	-0.0881988	0.136715	0.442546	-0.309802	-0.628138	0.328272	0.0585187	-0.0753622	0.0400665	0.0430118	-0.140033	-0.15461
MER52-int	ERV1	LTR	-0.20723	-1.26805	0.718765	0.176285	-0.325915	-0.332189	-0.0465684	-0.370834	-0.494611	-0.858805	0.537453	-0.317709	-1.40146	0.305294	0.258884	-0.42025	-0.848971	0.304007	-0.0542446	0.0583017
MER52A	ERV1	LTR	-0.0715781	-0.941912	1.55824	-0.115251	-0.503648	0.0904733	-0.229148	-0.278358	0.226547	-1.03282	1.11665	-0.451699	-1.51243	0.800885	-0.240477	-0.486589	-0.291317	0.416948	0.0632379	0.0524666
MER52C	ERV1	LTR	-0.227095	-1.01046	1.34107	0.145159	-0.0165068	0.334655	-0.163256	-0.193481	0.182904	-1.02782	1.05461	-0.502052	-0.939159	0.640297	0.107426	-0.336134	-0.339667	0.489568	0.214213	0.0498691
MER52D	ERV1	LTR	-0.06971	-0.971258	1.59345	-0.0870578	-0.304546	0.206346	-0.360114	-0.314096	0.474268	-0.847441	0.966856	-0.498913	-1.18612	0.500653	-0.0762776	-0.41927	-0.173712	0.405838	0.157296	0.0554564
MER53	hAT	DNA	-0.167295	0.146543	-0.577025	0.114651	-0.253196	-0.200653	-0.162233	-0.100598	-0.483157	-0.0302391	-0.556363	0.0669643	0.337477	-0.6318	0.493676	-0.0552803	-0.0412087	-0.000774955	0.235274	0.236087
MER54A	ERVL	LTR	-0.157282	-0.408162	0.523249	-0.0477137	-0.145248	-0.0752414	0.140819	0.233515	-0.279449	-0.791022	0.674767	-0.068609	-1.58076	-0.00829748	-0.0969676	-0.424072	-0.319335	0.436939	-0.0608938	-0.0874826
MER54B	ERVL	LTR	-0.196036	-0.00265731	0.322284	0.321163	-0.27879	0.167329	-0.17893	-0.0957704	-0.426663	-0.461801	0.257267	-0.000445993	-0.71329	-0.36893	-0.0582659	-0.340373	-0.433942	0.354821	-0.12327	-0.0352005
MER57-int	ERV1	LTR	-0.346662	-1.24271	0.229059	-0.113768	-0.049308	-0.523303	0.353876	-0.507752	-0.850878	-0.586153	0.17262	-0.155025	-0.884861	0.137255	0.377995	-0.226778	-0.748354	0.0632888	0.101352	0.224098
MER57A-int	ERV1	LTR	-0.666546	-1.13769	-0.218316	-0.134329	-0.342923	-0.266266	0.101082	-0.498343	-1.07281	-0.472522	-0.214732	-0.111219	-1.08119	-0.132459	0.208159	-0.247818	-0.587021	-0.122854	-0.052539	0.0522927
MER57A1	ERV1	LTR	-0.248733	-0.613955	0.0851928	0.192107	-0.0875872	-0.173948	0.0638076	-0.252165	-0.564218	-0.346255	0.0880859	-0.0696689	-0.970938	-0.0450434	0.0391201	-0.223734	-0.533309	0.157383	-0.0620022	0.0364141
MER57B1	ERV1	LTR	-0.375131	-0.589666	-0.145394	0.086078	-0.26947	-0.057987	-0.0857172	-0.256434	-0.585748	-0.316038	-0.00851901	0.0869622	-1.17482	-0.0758554	0.229101	-0.249908	-0.213779	0.164687	-0.0486976	-0.00075493
MER57B2	ERV1	LTR	-0.381886	-0.620705	-0.161801	0.21572	-0.248341	0.122162	-0.156334	-0.271955	-0.712578	-0.416006	-0.0996143	-0.0950422	-1.22572	-0.121005	-0.0171103	-0.239122	-0.123128	-0.0342702	-0.0653884	-0.0646146
MER57C1	ERV1	LTR	-0.286307	-0.247545	0.00365455	0.141515	-0.214243	-0.107771	0.000910752	-0.449694	-0.386008	-0.312406	-0.0506335	0.0265702	-1.05995	-0.0823747	-0.212702	-0.469612	-0.28743	-0.281108	-0.105187	-0.177528
MER57C2	ERV1	LTR	-0.103816	0.014904	0.138476	0.194319	-0.184155	-0.0587578	-0.12255	-0.357102	-0.54402	-0.00674623	-0.0490281	-0.0429708	-0.965384	-0.152111	-0.0752986	-0.187672	-0.163788	0.151795	-0.16169	-0.0681449
MER57D	ERV1	LTR	-0.074854	0.282316	0.11558	-0.0590111	-0.23206	-0.0258169	0.0569091	-0.550468	-0.550497	-0.369599	0.220475	-0.0417471	-1.19397	-0.0621925	-0.157313	-0.203111	-0.209004	0.104637	-0.104016	-0.0808829
MER57E1	ERV1	LTR	-0.30975	0.10018	-0.124974	0.131968	-0.330706	0.0153097	-0.0774384	-0.484441	-0.7752	-0.3362	-0.182705	-0.150564	-1.07937	-0.0807264	0.0289399	-0.138694	-0.414077	0.00951015	0.0457243	0.190295
MER57E2	ERV1	LTR	0.0422156	0.226033	0.0308788	0.234102	0.060819	-0.351045	0.284236	-0.154591	-0.513162	-0.519136	0.419026	-0.0652772	-1.03888	-0.545258	-0.222399	-0.261141	0.106171	0.247396	-0.0849301	0.218014
MER57E3	ERV1	LTR	3.62384	1.78092	-0.137312	-0.653309	3.20991	0.872666	0.157817	-0.87269	3.49268	2.60881	-0.016078	-0.1241	5.15966	-0.0300618	-0.959815	2.15758	0.658123	-0.0298538	0.442959	0.273573
MER57F	ERV1	LTR	-0.347919	-0.450744	-0.427912	-0.166131	-0.0812383	-0.118059	0.104444	-0.18432	-0.751529	-0.366363	-0.336498	0.0135255	-0.3447	-0.334756	0.353984	-0.162105	-0.267322	0.0151723	-0.057645	0.0431238
MER58A	hAT-Charlie	DNA	-0.424804	0.00541047	-0.197687	-0.0458059	-0.357716	0.0488938	-0.164655	-0.410489	-0.765454	-0.325183	-0.261714	-0.0963308	-1.3	-0.229235	-0.161888	-0.199892	-0.0243828	-0.0399524	0.0425192	0.0471801
MER58B	hAT-Charlie	DNA	-0.303743	0.24657	-0.381674	-0.0283781	-0.346279	0.0553271	-0.140393	-0.353927	-0.637897	-0.239395	-0.431023	-0.054053	-0.778623	-0.276613	-0.0476826	-0.176176	0.0491933	-0.133795	0.125093	0.129284
MER58C	hAT-Charlie	DNA	-0.270724	0.237868	-0.37474	-0.116491	-0.305194	0.107375	-0.180855	-0.50173	-0.709022	-0.21016	-0.427524	-0.0492611	-0.567034	-0.261343	-0.00975808	-0.13608	0.0778003	-0.195027	0.160957	0.193659
MER58D	hAT-Charlie	DNA	-0.503126	0.191353	-0.364589	0.0969113	-0.430392	-0.0702947	-0.0810208	-0.229686	-0.697199	-0.213194	-0.469588	0.120128	-0.837114	-0.120399	0.125132	-0.115232	-0.29816	-0.0866417	0.131136	0.244581
MER5A	hAT-Charlie	DNA	-0.0559484	0.175548	-0.154323	0.252342	-0.163663	0.0952222	-0.293379	-0.0476844	-0.124947	-0.128533	-0.196429	-0.0767936	-0.473428	-0.299701	0.0846577	-0.128178	0.10658	0.0642257	-0.0389036	-0.0370749
MER5A1	hAT-Charlie	DNA	-0.124895	-0.063966	-0.13433	0.335423	-0.183721	0.0642075	-0.273677	0.00827695	-0.144382	-0.116444	-0.214895	-0.0754244	-0.680681	-0.272064	0.0395821	-0.228924	0.110419	0.12606	-0.135452	-0.117462
MER5B	hAT-Charlie	DNA	-0.137148	0.231977	-0.248275	0.26241	-0.202164	0.111836	-0.245306	-0.107218	-0.260671	-0.149572	-0.281765	-0.10269	-0.457968	-0.344741	0.161612	-0.20813	0.0701189	0.0542176	0.0849612	0.0745004
MER5C	hAT-Charlie	DNA	-0.389821	0.126651	-0.683365	-0.0835732	-0.433579	-0.107886	-0.146645	-0.396684	-0.723145	-0.145499	-0.714573	-0.0801037	-0.33722	-0.33553	0.1554	-0.0994738	-0.195038	-0.264658	-0.0282449	-0.0354136
MER5C1	hAT-Charlie	DNA	-0.431108	-0.0598085	-0.451629	-0.0655641	-0.316415	-0.039328	-0.259621	-0.242182	-0.485794	-0.345445	-0.388468	-0.04974	-0.660015	-0.263765	-0.0543158	-0.125744	-0.228799	-0.130622	-0.0881592	0.0242898
MER6	TcMar-Tigger	DNA	-0.489246	-0.613227	-0.0978297	-0.175257	-0.333085	-0.0953972	-0.0693082	-0.411386	-0.656343	-0.293804	-0.238112	-0.102345	-1.22836	-0.172228	-0.394139	-0.190994	-0.264587	0.0205174	-0.0238197	-0.000470442
MER61-int	ERV1	LTR	-0.186926	-1.16207	0.417728	-0.0721607	0.143005	-0.051	0.304661	-0.485811	-0.7126	-0.541089	0.373741	-0.129438	-0.549026	0.342988	0.158342	-0.124637	-0.640908	0.117014	-0.0150344	0.063682
MER61A	ERV1	LTR	0.213273	-0.290328	0.607987	0.010399	-0.0695384	0.373511	-0.112608	-0.251826	-0.31243	-0.379336	0.363415	-0.0823317	-0.549427	0.194336	-0.0354912	-0.334194	-0.243969	0.425333	0.0433731	0.0303257
MER61B	ERV1	LTR	-0.0822392	-0.484094	0.414141	-0.0558002	-0.0418151	0.323035	-0.00190126	-0.286963	-0.311237	-0.455108	0.306807	-0.164383	-1.21658	-0.0740179	-0.0708816	0.0587666	-0.218254	0.318483	0.0703666	0.0592819
MER61C	ERV1	LTR	-0.00727676	0.00620986	0.686165	-0.219763	0.130766	0.474664	0.0819988	-0.470103	-0.115992	-0.328788	0.560909	-0.174626	0.861352	0.3334	-0.472751	-0.56116	-0.459382	0.176002	0.142038	-0.0391857
MER61D	ERV1	LTR	0.234667	0.0991339	0.721233	-0.0295484	0.0510759	0.550353	0.0483646	-0.438386	-0.0234653	-0.0276702	0.43468	-0.0597924	-0.664876	0.605408	-0.366853	-0.0544459	0.0597434	0.384829	0.0842136	-0.117
MER61E	ERV1	LTR	-0.0784283	-0.200182	0.679699	-0.0526842	0.0988111	0.637769	0.235651	-0.56341	-0.238246	-0.208418	0.515856	-0.213754	-1.40677	0.619128	-0.488296	-0.219624	-0.423803	0.157131	0.00519792	-0.228519
MER61F	ERV1	LTR	-0.228651	0.36286	0.181634	0.520477	0.428122	1.2136	0.0746363	-0.0343575	-0.0803935	0.135884	-0.2281	-0.112817	-0.290962	0.173435	0.181855	-0.204174	0.251482	0.169981	0.446115	-0.0120483
MER63A	hAT-Blackjack	DNA	-0.361424	0.0267683	0.00292914	0.381503	-0.436104	-0.00603439	-0.180958	-0.12312	-0.413543	-0.127034	0.0450303	-0.0820305	-1.43645	-0.106762	0.0308827	-0.281299	-0.135419	0.175293	-0.125528	-0.141072
MER63B	hAT-Blackjack	DNA	-0.449887	-0.0389069	-0.243934	0.154517	-0.496025	-0.159283	-0.138449	-0.158208	-0.668308	-0.0655713	-0.309956	-0.00637507	-1.09546	-0.188481	0.100846	-0.171455	-0.093078	0.0554408	-0.0499681	-0.0444584
MER63C	hAT-Blackjack	DNA	-0.730383	-0.546825	-0.46501	-0.187355	-0.553833	-0.375189	-0.0333448	-0.411988	-0.921762	-0.174437	-0.506473	0.0330805	-1.22987	-0.317896	0.0396825	-0.160667	-0.389696	-0.131389	-0.15576	-0.0996547
MER63D	hAT-Blackjack	DNA	-0.37227	0.0700793	-0.318663	0.00992174	-0.566765	-0.293438	-0.138143	-0.255732	-0.734009	-0.12538	-0.507923	0.013426	-0.674519	-0.188163	0.104904	-0.0947927	-0.0509492	-0.091737	-0.0453154	0.0216471
MER65-int	ERV1	LTR	-0.825845	-1.01144	-0.439067	0.0223222	-0.302125	-0.357752	0.197776	-0.464938	-1.09538	-0.381636	-0.279471	0.0248286	-1.11357	-0.274973	0.388163	-0.270802	-0.397522	-0.0868035	-0.121436	-0.0169787
MER65A	ERV1	LTR	-0.353747	-0.872752	-0.213979	0.314989	-0.26928	-0.18326	-0.0277957	-0.23113	-0.431588	-0.206574	-0.117278	-0.0632943	-0.793307	-0.338497	0.251162	-0.216428	-0.191768	0.188054	0.0212641	0.118165
MER65B	ERV1	LTR	-0.427073	0.22338	-0.0264115	0.149164	-0.315967	0.370519	-0.306781	-0.291362	-0.722851	-0.369994	-0.144397	-0.134326	-0.977936	-0.200524	0.104453	-0.404997	-0.345696	0.0971399	0.06687	-0.139028
MER65C	ERV1	LTR	-0.246549	-0.229693	-0.144292	0.34413	-0.0890375	0.0619154	-0.0217796	-0.0448633	-0.513253	-0.119587	-0.0641033	-0.0613293	-0.63171	-0.0710949	0.308345	-0.248614	-0.271791	-0.0802308	0.0264337	0.0472249
MER65D	ERV1	LTR	-0.336881	0.0354138	-0.30486	0.439377	-0.294977	0.115901	-0.14365	0.0107497	-0.195525	-0.286912	-0.120591	0.0384428	-0.833314	-0.379917	0.181276	-0.232311	-0.327683	0.0691005	-0.0474071	-0.0388208
MER66-int	ERV1	LTR	-0.312155	-0.78383	0.321387	0.221016	-0.22642	-0.311668	0.133815	-0.353407	-0.77133	-0.670818	0.145771	-0.206677	-1.25717	0.044582	0.23018	-0.275956	-0.622351	0.26442	0.0642264	0.055395
MER66A	ERV1	LTR	-0.111378	-0.686112	0.460432	0.419608	-0.161682	0.0405056	0.146373	0.0538103	0.0672783	-0.293654	0.631816	-0.106267	-1.43752	0.0966999	-0.151312	-0.157676	-0.233636	0.616093	-0.10943	0.00756051
MER66B	ERV1	LTR	-0.289388	-0.604846	0.280344	0.429274	-0.358815	-0.0559301	-0.0720521	-0.00267389	0.079459	-0.219208	0.544017	-0.0404355	-1.16951	0.180216	-0.219266	-0.403606	-0.269307	0.407767	-0.0452142	-0.0711132
MER66C	ERV1	LTR	-0.237649	-0.470726	0.260505	0.117964	-0.254714	-0.180519	-0.0027961	-0.423833	-0.203298	-0.415261	0.455996	-0.136336	-1.17479	0.153774	-0.426925	-0.365518	-0.413515	0.217935	-0.135562	-0.135688
MER66D	ERV1	LTR	-0.421497	-0.553551	0.142735	0.225018	-0.178565	-0.13972	0.0186287	-0.28023	-0.134036	-0.458458	0.353486	-0.0972657	-1.20653	-0.0395003	-0.341595	0.0895226	0.00275648	0.213226	-0.222637	-0.0766201
MER67A	ERV1	LTR	0.120549	0.0765724	-0.14397	-0.0814379	0.106852	0.292026	-0.249785	-0.1333	0.270992	-0.249755	0.0385718	-0.0630549	0.014223	-0.254682	0.0859674	-0.133029	0.0907428	-0.0214828	0.0026063	-0.196064
MER67B	ERV1	LTR	0.641458	0.483114	0.0538723	0.226976	0.227036	0.693903	-0.374205	0.0887356	0.558767	-0.146663	-0.0973081	-0.135297	0.408731	-0.354819	0.298354	-0.0153703	0.0779173	-0.00627058	-0.03052	-0.198459
MER67C	ERV1	LTR	-0.40551	-0.816169	-0.190233	-0.0887712	-0.108838	0.189279	-0.103146	-0.237916	-0.592974	-0.152559	-0.341279	-0.0118964	-0.626221	-0.41587	0.260446	-0.0990936	-0.43023	0.0244099	-0.0197074	-0.0238598
MER67D	ERV1	LTR	-0.3991	-0.449812	-0.119452	-0.160772	-0.0468361	0.451697	-0.144752	-0.287272	-0.61304	-0.300049	-0.123689	0.0303571	-1.07095	-0.429192	0.071232	-0.322471	-0.476143	0.00666722	0.0100191	0.0171985
MER68	ERVL	LTR	-0.310884	0.396055	-0.083115	-0.0827028	-0.381397	0.239381	-0.156282	-0.392391	-0.346221	-0.368115	0.100929	-0.229505	-1.42817	-0.0110073	-0.288543	-0.278944	-0.0405703	-0.0522181	-0.125439	-0.0836189
MER68-int	ERVL	LTR	-0.171249	0.0756202	-0.0963188	0.395764	-0.0340312	0.461651	-0.141118	-0.447243	-0.283552	0.594727	-0.170836	-0.242145	-0.588146	-0.327924	0.135919	-0.328861	-0.211747	0.286597	0.176369	-0.109403
MER68B	ERVL	LTR	-0.169925	0.0870592	0.0796718	0.0732213	-0.311473	0.367944	-0.16418	-0.359549	-0.165585	-0.326995	0.0825882	-0.196576	-0.891256	0.0338741	-0.0954221	-0.257925	0.230831	0.0514793	0.0295234	-0.116484
MER68C	ERVL	LTR	-0.412654	-0.706124	-0.280515	0.29263	-0.302944	0.0751725	0.0185186	0.0935075	-0.307773	-0.590503	-0.0939413	-0.101334	-1.28511	-0.165991	-0.0400416	-0.182221	-0.734007	0.343199	-0.244403	-0.0724251
MER6A	TcMar-Tigger	DNA	-0.472031	-0.154048	-0.0923217	-0.141361	-0.364869	-0.0839575	-0.103874	-0.364051	-0.567711	-0.413965	-0.161295	-0.0839436	-1.21859	-0.0684596	-0.311655	-0.244354	-0.132274	0.00366159	-0.0240896	-0.00702263
MER6B	TcMar-Tigger	DNA	-0.618142	-0.317977	-0.374481	-0.0649883	-0.297659	-0.198302	-0.0282121	-0.378437	-0.856456	-0.313763	-0.449299	-0.0860254	-1.34976	-0.00992917	-0.0214786	-0.219217	-0.383843	-0.0656989	-0.20663	-0.165153
MER6C	TcMar-Tigger	DNA	-0.895802	-0.444349	-0.450402	-0.72746	0.111612	-0.0524316	0.320619	-0.197259	-0.654651	-0.324472	-0.0431159	-0.045201	-0.640389	0.189239	-0.185504	-0.599311	-0.343218	-0.144522	-0.0966921	-0.0310671
MER70-int	ERVL	LTR	-0.353373	-1.45867	0.544521	-0.00151033	-0.249482	-0.63178	0.193124	-0.0280131	-0.394854	-0.656965	0.298963	-0.384798	-1.59978	-0.224209	-0.0114742	-0.36425	-0.777272	0.596051	-0.185609	-0.106438
MER70A	ERVL	LTR	-0.188867	-0.689812	0.53905	0.121007	-0.403201	0.0319938	-0.0196832	-0.182094	-0.209467	-0.6129	0.4226	-0.0616002	-1.35563	-0.0605988	0.0511704	-0.298692	-0.239861	0.356151	-0.202068	-0.171905
MER70B	ERVL	LTR	-0.33775	-1.01353	0.412111	0.342702	-0.412083	0.0482718	-0.25901	-0.0550116	-0.214808	-0.52637	0.340927	-0.0978391	-1.46073	-0.084362	0.222651	-0.202247	-0.285491	0.358909	-0.297395	-0.243246
MER70C	ERVL	LTR	-0.0299961	-0.662583	0.608467	0.00496644	-0.380038	-0.142247	-0.32667	-0.309966	0.426336	-0.227622	0.630881	-0.222864	-1.05826	-0.0975113	-0.369995	-0.274816	-0.246958	0.443096	-0.210817	-0.23808
MER72	ERV1	LTR	-0.31746	-0.456875	0.0862926	0.316065	-0.297017	0.0471356	-0.0926633	-0.240063	-0.245668	-0.329724	0.188026	-0.170365	-1.10168	0.0121004	-0.164136	-0.352548	-0.343511	0.197819	0.0178143	-0.0985106
MER72B	ERV1	LTR	0.0367602	0.77922	0.0993176	0.0302998	-0.217745	-0.130485	0.197833	-0.201318	-0.212213	-0.362102	0.329215	-0.0565445	-1.2558	0.0250591	-0.182711	-0.060114	-0.20285	0.320515	-0.183839	-0.032364
MER73	ERVL	LTR	-0.117729	-0.0913832	0.239047	-0.0445968	-0.155222	0.00861904	-0.150232	-0.438763	-0.295052	0.0308439	0.134316	0.0084831	-0.681148	-0.00544002	-0.00865233	-0.0735413	-0.347227	0.0118887	0.00280185	0.0980494
MER74A	ERVL	LTR	-0.24086	0.208123	0.297939	0.395403	-0.322458	0.135119	-0.296143	-0.0821208	-0.346865	-0.366456	0.0717146	-0.182332	-1.43821	-0.204637	0.107931	-0.488655	-0.186572	0.352058	-0.0795409	-0.100791
MER74B	ERVL	LTR	-0.338498	0.0009498	0.0863258	0.263438	-0.367118	0.259927	-0.305641	-0.0185621	-0.252564	-0.458831	0.110481	-0.0857649	-1.34975	-0.0775034	0.196106	-0.33641	-0.0179261	0.24666	-0.064815	-0.134461
MER74C	ERVL	LTR	-0.366711	-1.06927	0.212055	-0.0388024	-0.535456	0.189733	-0.162127	-0.24503	-0.598429	-0.213369	0.157791	-0.317215	-1.35318	-0.329128	-0.273316	-0.511779	-0.329096	0.418232	-0.0752286	-0.0936555
MER75	PiggyBac	DNA	-0.609754	-0.802318	-0.376414	-0.271579	-0.136041	-0.15552	0.124368	-0.426157	-0.75245	-0.0400511	-0.272528	0.0273428	-0.457932	-0.196692	0.0335728	-0.0137151	-0.299057	-0.194013	0.0584788	0.210972
MER75A	PiggyBac	DNA	-0.670599	-0.102329	-0.629087	-0.151132	-0.397838	-0.164002	-0.0319524	0.0643077	-0.946425	0.153168	0.0489291	0.023239	-1.74688	-0.47704	0.0794173	-0.431106	-1.05864	-0.2629	-0.0912363	0.218319
MER75B	PiggyBac	DNA	-0.52644	-0.258957	-0.734336	0.0816171	-0.433921	-0.260767	0.0959645	-0.267748	-1.02902	-0.00444637	-0.352734	0.1085	-0.216994	-0.686303	0.213174	-0.476838	-0.388089	-0.114001	0.08674	0.141282
MER76	ERVL	LTR	-0.063699	0.331531	0.398997	-0.0770692	-0.262132	0.328398	-0.350396	-0.495715	-0.0776909	-0.281559	0.309217	-0.221059	-1.17211	-0.220846	-0.144854	-0.347264	-0.456164	0.0963549	-0.100743	-0.108058
MER76-int	ERVL	LTR	-0.183068	-0.179129	0.349508	-0.222051	-0.304079	-0.280951	-0.0711534	-0.551171	-0.321181	-0.499934	0.245467	-0.514402	-1.34209	0.0771025	-0.514649	-0.425672	-0.495229	0.248031	-0.0769371	0.0802894
MER77	ERVL	LTR	-0.303147	-0.276247	0.244231	0.0564963	-0.346438	-0.0204721	-0.0356226	-0.262816	-0.493827	-0.524577	0.352652	-0.154097	-1.56495	-0.0600538	-0.212525	-0.369086	-0.377257	0.143082	-0.151066	-0.0996314
MER77B	ERVL	LTR	-0.180089	0.269686	0.329497	0.0969209	-0.320499	-0.181279	0.0529601	-0.366677	-0.434836	-0.496566	0.413371	-0.202395	-1.53328	0.155964	-0.214534	-0.396259	-0.280085	0.187493	-0.151353	-0.0247191
MER8	TcMar-Tigger	DNA	-0.36329	-0.575129	-0.158373	-0.125939	-0.244012	0.0696275	-0.0299732	-0.36781	-0.511361	-0.412437	0.0473461	-0.0740165	-1.1503	0.108604	-0.380712	-0.202538	-0.272737	-0.13859	-0.00326722	0.082069
MER81	hAT-Blackjack	DNA	-0.18181	0.444661	-0.104573	0.439199	-0.273902	0.119624	-0.324295	0.0456717	-0.314863	-0.21391	-0.0730543	-0.181488	-1.04821	-0.215742	0.14505	-0.276533	0.190418	0.289421	-0.197754	-0.216765
MER83	ERV1	LTR	-0.238296	-0.389778	0.0556562	0.710084	-0.055778	0.312224	0.0874457	0.191659	-0.0521669	0.027248	0.196678	-0.181701	-0.693759	0.0737567	0.362754	-0.392799	-0.244914	0.203288	-0.0444759	-0.224917
MER83A-int	ERV1	LTR	-0.141148	-0.288216	-0.0152294	0.800353	0.0404349	0.454103	-0.254702	-0.344353	-0.644032	-0.631295	0.00582545	-0.253875	-1.41655	0.0305124	0.774383	0.095738	-0.022134	0.267379	0.145465	-0.200589
MER83B	ERV1	LTR	-0.330594	-0.893263	0.161367	0.438665	-0.321051	0.097917	-0.0888835	-0.515496	-0.702443	-0.613332	-0.122193	-0.431249	-1.39705	0.159924	-0.0337622	-0.123292	0.353972	0.133056	0.066543	0.104983
MER83B-int	ERV1	LTR	-0.414304	-0.824573	0.291073	0.292734	-0.115684	-0.0785045	0.264302	-0.55539	-0.901708	-0.788844	0.0527696	-0.259728	-1.34891	0.215779	0.284381	-0.32803	-0.385493	0.0463519	0.0496906	-0.0537003
MER83C	ERV1	LTR	-0.00386547	-0.799726	0.469344	0.440554	-0.138765	0.24902	0.154537	-0.284096	-0.549637	-0.613016	0.151742	-0.245843	-1.51133	0.00928903	-0.00316928	-0.20364	-0.320158	0.145779	0.31221	0.0789352
MER84	ERV1	LTR	-0.266551	-0.51765	-0.0626879	0.178089	-0.188445	0.0885568	-0.15013	-0.211441	-0.385654	-0.110945	-0.154715	-0.0190638	-0.290365	-0.256372	0.202671	-0.139464	-0.0299752	0.279101	0.0758537	0.117048
MER84-int	ERV1	LTR	-0.100976	-0.304089	0.205773	1.21586	-0.282892	-0.278938	-0.270632	0.340508	-0.75409	-0.793824	-0.151151	-0.0303962	-1.06609	0.104479	0.643976	-0.425881	-0.921282	0.340438	0.0748238	0.0461217
MER85	PiggyBac	DNA	-0.231599	0.065875	-0.377222	-0.132088	-0.264936	-0.386115	-0.0647572	-0.359698	-0.381189	-0.0337805	-0.283427	-0.0287533	-0.5261	-0.191698	-0.12913	0.0114551	0.0053423	-0.0275619	-0.0238682	0.110999
MER87	ERV1	LTR	-0.371758	-0.444626	-0.0180764	0.396626	-0.379124	0.028605	-0.221028	-0.154618	-0.672716	-0.501277	-0.27325	-0.0802761	-1.04496	-0.137736	0.14234	-0.115959	-0.320748	0.219542	-0.182387	-0.22466
MER87B	ERV1	LTR	-0.428785	-1.12846	-0.0696335	0.636072	-0.197477	0.126956	-0.00125911	0.0366637	-0.677298	-0.650229	-0.197214	-0.0311689	-1.29111	-0.184969	0.249801	-0.154157	-0.29421	0.136001	-0.0963241	-0.00904694
MER88	ERVL	LTR	-0.260394	-0.141571	0.335846	0.234208	-0.329537	-0.105332	0.0422321	0.0102785	-0.206091	-0.651247	0.380451	-0.344919	-1.16943	0.0721036	-0.311382	0.0772951	-0.189661	0.367663	0.0207205	0.0404109
MER89	ERV1	LTR	-0.0152578	0.0324055	0.144274	0.348824	-0.170931	0.18398	-0.188146	-0.122306	-0.227128	-0.186367	0.107474	-0.185859	-0.883218	-0.229214	0.0827716	-0.191174	0.0428496	0.209003	-0.0602484	-0.101151
MER89-int	ERV1	LTR	-0.508474	-1.24168	-0.0582472	0.0970137	-0.0784566	-0.410648	0.14469	-0.105961	-0.600769	-0.528522	0.0973156	-0.0898883	-1.09657	-0.225815	0.560701	-0.227618	-0.564662	0.47361	-0.0346777	0.0854365
MER90	ERV1	LTR	0.224646	-0.291462	-0.149268	0.328762	-0.0719211	0.108111	-0.216451	0.0477299	0.204892	0.0194205	-0.0549	0.0313486	-0.56817	-0.431645	0.131012	0.0838554	0.0482022	0.172055	-0.154552	-0.111875
MER90a	ERV1	LTR	-0.0752528	0.185178	-0.0350308	0.193265	-0.264184	-0.000692081	-0.204908	-0.172442	-0.15504	-0.190451	-0.112125	-0.0554484	-0.952532	-0.241187	0.0451009	-0.209981	-0.0101029	0.104442	-0.169514	-0.0710241
MER91A	hAT-Tip100	DNA	-0.27881	-0.133689	0.1367	0.484177	-0.419376	0.221331	-0.339957	0.225246	-0.134017	-0.117199	0.197183	-0.0403632	-1.53657	-0.206975	0.0672857	-0.304246	0.267644	0.372641	-0.141021	-0.205679
MER91B	hAT-Tip100	DNA	-0.469102	-0.562746	-0.0652984	0.430339	-0.510765	-0.138439	-0.318696	-0.0919241	-0.530007	-0.197706	-0.369684	-0.178711	-1.5194	-0.433466	-0.0588062	-0.294914	-0.0856569	0.0861166	-0.196982	-0.137986
MER91C	hAT-Tip100	DNA	-0.208487	-0.00475068	0.0757718	0.272453	-0.475354	-0.0770323	-0.394023	-0.107222	-0.167682	-0.175866	0.00598291	-0.164984	-1.48825	-0.210984	-0.221075	-0.26883	0.135054	-0.0264005	-0.212438	-0.27791
MER92-int	ERV1	LTR	-0.755752	0.173517	-0.443108	-0.179182	-0.354338	-0.181211	0.0577593	-0.380364	-1.10933	-0.402935	-0.48278	-0.0293752	-0.850983	-0.285568	0.491142	-0.188219	-0.428729	0.0889748	0.0428342	0.00381324
MER92A	ERV1	LTR	-0.204025	-0.179273	-0.0764062	-0.022894	-0.221823	0.403433	0.0607624	0.692728	-0.432624	0.452137	-0.10102	0.0183861	-1.07964	-0.531339	0.342869	-0.847378	-0.410464	0.0652437	-0.17621	-0.152853
MER92B	ERV1	LTR	-0.0790043	-0.234288	0.0735111	0.199413	-0.0683757	0.217693	-0.0734486	-0.503418	-0.173775	-0.471557	-0.00208427	-0.152363	-0.699504	0.040308	0.090419	-0.173735	-0.366962	0.0597349	0.0193549	-0.0470724
MER92C	ERV1	LTR	0.505923	0.280261	-0.0880286	0.0274427	0.231652	0.410997	-0.33244	-0.0256604	0.629557	0.364358	-0.0651094	-0.382945	0.965739	-0.122366	0.0426609	-0.0273091	-0.115377	0.490881	0.0542078	-0.134313
MER92D	ERV1	LTR	-0.270522	-0.20233	-0.381115	-0.0190628	-0.355977	-0.317764	-0.212608	-0.467914	-0.271681	0.346136	-0.173531	-0.103726	-0.812405	-0.465706	-0.134961	0.173271	-0.286977	0.0435216	-0.103018	0.0587327
MER94	hAT-Blackjack	DNA	-0.415835	0.00611171	-0.276748	0.0332507	-0.351669	-0.059081	-0.165185	-0.129431	-0.459041	-0.0474998	-0.223493	-0.0631077	-1.06875	-0.382525	0.107913	-0.126016	0.000264756	0.0590933	-0.15901	-0.108522
MER94B	hAT-Blackjack	DNA	-0.0155066	0.389332	-0.40964	0.201432	-0.158486	-0.0802618	-0.338717	-0.186886	0.017229	0.452152	-0.191486	0.0630764	0.113127	-0.41039	0.367882	-0.0184857	0.128639	0.417655	-0.225601	-0.140752
MER95	ERV1	LTR	-0.100902	0.276618	-0.745772	-0.250877	-0.0889886	0.103564	-0.0919377	-0.5107	-0.309761	0.0639796	-0.43057	-0.0967561	-0.237042	-0.306281	0.3908	-0.258266	-0.259708	-0.0987915	-0.353569	-0.246526
MER96	hAT-Tip100	DNA	-0.103862	-0.592101	0.130225	0.428057	-0.102061	0.0420493	-0.286447	0.246635	0.0482583	-0.237797	0.0596834	-0.0655573	-0.518567	-0.243938	0.165524	-0.140449	0.0975602	0.244282	-0.157399	-0.123586
MER96B	hAT-Tip100	DNA	-0.0291726	-0.0776996	-0.381743	0.268571	-0.28734	-0.224971	-0.176619	0.139219	-0.501566	-0.0338769	-0.570076	0.143426	0.0679069	-0.320086	0.456412	-0.089054	-0.0529786	0.110159	0.157756	0.140704
MER97a	hAT-Tip100	DNA	-0.386818	0.00169187	-0.391085	0.078009	-0.390792	-0.199373	-0.0144495	-0.465736	-0.810491	0.0901438	-0.524866	-0.0063697	-0.930629	-0.741503	-0.117958	-0.13341	-0.362613	0.0785109	-0.101373	0.0130722
MER97b	hAT-Tip100	DNA	-0.851312	0.100289	-0.374441	0.356384	-0.599654	-0.222542	-0.062055	-0.381778	-1.0663	-0.1726	-0.664063	0.05091	-1.24297	-0.794449	0.350734	0.056903	-0.555174	0.010626	-0.180549	-0.123283
MER97c	hAT-Tip100	DNA	-0.896597	-0.695842	-0.506017	0.158497	-0.421182	-0.353389	-0.213958	-0.160819	-0.999856	-0.335353	-0.558782	0.0827574	-1.064	-0.461714	0.524177	0.0170226	-0.148234	0.117788	0.101435	0.0108738
MER97d	hAT-Tip100	DNA	-0.848131	-0.521004	-0.76849	-0.272303	-0.252006	-0.140555	0.0620603	-0.202458	-1.12146	-0.191255	-0.732494	0.309241	-1.03687	-0.304163	-0.0327797	-0.424138	-0.310175	-0.12192	0.0296369	-0.200788
MER99	hAT	DNA	-0.494478	0.0764695	-0.514159	-0.158596	-0.259488	-0.213688	0.00635073	0.291004	-0.821831	-0.459624	-0.540657	-0.00163473	-0.408426	-0.44283	0.409102	-0.426421	-0.379437	0.0265249	-0.367945	-0.154141
MER9B	ERVK	LTR	-0.226101	-1.26202	1.03623	0.311609	0.429187	0.797636	-0.133601	0.00721427	0.0232122	0.492135	0.52275	-0.0951735	-1.35926	0.107099	0.0775394	-0.564571	0.124685	-0.0182999	0.256883	-0.0552505
MER9a1	ERVK	LTR	-0.0292758	-1.05917	0.933618	0.355889	0.00999431	-0.259912	0.433385	-0.177245	-0.405286	-0.442197	0.750975	-0.0206832	-1.39322	0.524232	0.207411	-0.466755	-0.592473	0.348019	0.148091	0.294661
MER9a2	ERVK	LTR	0.00255341	-1.05887	0.985519	0.263482	0.143944	-0.268437	0.553278	0.0108783	-0.251627	-0.4446	0.785335	0.026685	-1.41934	0.570098	0.0384844	-0.391605	-0.528286	0.337975	0.138309	0.233609
MER9a3	ERVK	LTR	-0.157097	-1.03027	0.931405	0.0899699	-0.0448052	-0.351678	0.429836	-0.24802	-0.330406	-0.555642	0.824108	-0.0953764	-1.40519	0.80903	-0.097564	-0.443946	-0.597782	0.252759	0.0533199	0.142079
MERX	TcMar-Tigger	DNA	-0.625933	-0.471049	-0.532206	-0.197517	-0.35934	-0.0787658	-0.0158086	-0.375261	-0.929418	-0.26353	-0.446863	0.116484	-1.04822	-0.409658	0.116619	-0.273817	-0.020198	-0.151353	0.0522153	-0.00432887
MIR	MIR	SINE	-0.163466	0.0627426	-0.259785	0.163757	-0.209746	-0.0795599	-0.238831	-0.00871503	-0.251265	-0.124248	-0.354465	-0.0349389	-0.455887	-0.332292	0.0708605	-0.0907046	0.0711968	0.0614346	-0.192365	-0.173792
MIR1_Amn	MIR	SINE	0.348872	0.55869	-0.131294	0.376739	0.0795641	0.187825	-0.385616	0.355239	0.43868	0.161701	-0.311804	-0.0329318	0.151548	-0.412951	0.140344	0.170155	0.464304	0.127865	-0.149419	-0.241535
MIR3	MIR	SINE	0.154004	0.461	-0.238891	0.306999	-0.0620917	0.13435	-0.340879	0.189671	0.167162	0.0966242	-0.357389	-0.0317378	-0.0154718	-0.332936	0.193152	0.00441977	0.320974	0.053	-0.146584	-0.199383
MIRb	MIR	SINE	-0.0649476	0.162764	-0.247979	0.247428	-0.169785	-0.011386	-0.275469	0.0537839	-0.102916	-0.0201121	-0.346942	-0.038734	-0.344912	-0.345441	0.128689	-0.0846488	0.127824	0.0659109	-0.191029	-0.184585
MIRc	MIR	SINE	-0.00801553	0.306664	-0.255038	0.25191	-0.12312	0.0354881	-0.264262	0.0715223	-0.0454606	0.0538975	-0.386482	-0.052147	-0.217546	-0.359681	0.127642	-0.0296667	0.206811	0.0661472	-0.179553	-0.188579
MLT-int	ERVL-MaLR	LTR	-0.268664	-0.395254	0.422038	0.115504	-0.337961	-0.27615	-0.137305	-0.510535	-0.45616	-0.650536	0.288488	-0.221532	-1.39283	0.0861764	-0.0673444	-0.169959	-0.41695	0.170893	-0.0574486	0.0451189
MLT1-int	ERVL-MaLR	LTR	-0.190371	-0.257126	-0.220613	0.0887617	-0.0899633	0.0836713	0.0797852	-0.201285	-0.829734	-0.217338	-0.0603019	-0.231348	-1.08355	0.119984	0.510301	-0.197645	-0.257373	0.0434693	-0.0422138	0.177943
MLT1A	ERVL-MaLR	LTR	-0.321335	-0.33907	0.225881	0.185747	-0.315048	-0.0664107	-0.110284	-0.210192	-0.46999	-0.337439	0.250533	-0.0632936	-1.2779	0.150949	0.0604787	-0.346128	-0.286454	0.131784	-0.0741349	-0.0235022
MLT1A-int	ERVL-MaLR	LTR	-0.403162	-0.453487	0.00216884	0.204836	-0.404511	-0.229356	-0.113198	-0.260233	-0.700036	-0.714133	0.191721	-0.230052	-1.24295	0.13182	0.106069	-0.391792	-0.606765	-0.121195	0.0478343	0.125835
MLT1A0	ERVL-MaLR	LTR	-0.353844	-0.445346	0.153816	0.14404	-0.261375	-0.0931859	-0.082223	-0.229069	-0.521284	-0.345023	0.254223	-0.081839	-1.3371	0.118783	0.0317226	-0.309508	-0.257534	0.129635	-0.0407098	-0.00620244
MLT1A0-int	ERVL-MaLR	LTR	-0.337401	-0.758345	0.202562	0.120165	-0.260602	-0.113267	-0.0195427	-0.364844	-0.628055	-0.740655	0.302203	-0.262721	-1.35075	0.101684	0.101676	-0.398356	-0.515951	0.098045	-0.0500649	0.00541601
MLT1A1	ERVL-MaLR	LTR	-0.381061	-0.63351	0.177236	0.191518	-0.281817	-0.0925644	-0.0536723	-0.264405	-0.524077	-0.373989	0.255137	-0.045629	-1.38772	0.1322	0.0372301	-0.343001	-0.351604	0.135488	-0.074762	-0.0104223
MLT1A1-int	ERVL-MaLR	LTR	-0.244395	-0.609235	0.315066	0.20029	-0.399865	-0.274086	-0.169454	-0.252272	-0.51541	-0.5848	0.34545	-0.242836	-1.36414	0.134353	0.144508	-0.332475	-0.548225	0.171645	0.0796226	0.00653932
MLT1B	ERVL-MaLR	LTR	-0.360822	-0.28353	0.104702	0.200871	-0.359374	-0.0386851	-0.199233	-0.169239	-0.509539	-0.240595	0.120319	-0.101579	-1.32545	0.0338825	0.134319	-0.338432	-0.190391	0.13385	-0.0762987	-0.0289032
MLT1B-int	ERVL-MaLR	LTR	-0.4541	-0.365544	-0.00641784	0.0976969	-0.248715	-0.0425904	-0.00738982	-0.300513	-0.709626	-0.540826	0.129014	-0.267242	-1.05965	0.152838	0.244352	-0.281732	-0.191678	0.0817722	0.0504701	0.0965195
MLT1C	ERVL-MaLR	LTR	-0.331161	-0.271876	0.101015	0.32194	-0.354082	0.0405078	-0.20042	-0.0269331	-0.454363	-0.336937	0.15377	-0.0991875	-1.38739	0.0371566	0.165162	-0.321812	-0.131055	0.192391	-0.164868	-0.147018
MLT1C-int	ERVL-MaLR	LTR	-0.24825	0.258798	0.0769752	0.0731758	-0.300214	-0.213074	-0.00642648	-0.307807	-0.66082	-0.474527	0.249629	-0.105913	-1.06192	0.0625767	0.27715	-0.342479	-0.403789	0.0206409	0.0224671	0.0531739
MLT1D	ERVL-MaLR	LTR	-0.315612	-0.47128	0.15005	0.281013	-0.282362	-0.0342222	-0.0594629	-0.142397	-0.49175	-0.383583	0.27194	-0.0650042	-1.27422	0.17341	0.155873	-0.273067	-0.196257	0.211019	-0.104523	-0.0639856
MLT1D-int	ERVL-MaLR	LTR	-0.231725	0.41152	-0.0604085	-0.0425787	-0.233079	-0.0496358	-0.025068	-0.432482	-0.603411	-0.619707	0.255451	-0.103393	-1.01723	0.173507	0.155026	0.0400831	0.0126627	0.0562883	0.0606707	0.098873
MLT1E	ERVL-MaLR	LTR	-0.438096	-0.472949	0.232739	0.0674172	-0.312355	-0.0231308	-0.123504	-0.284446	-0.422725	-0.298112	0.103066	-0.135813	-1.37352	-0.0216054	0.0125394	-0.234195	-0.347371	0.0855807	-0.195195	-0.125036
MLT1E-int	ERVL-MaLR	LTR	-0.94611	-1.70402	0.460854	0.851652	-0.36828	0.166975	0.156087	-0.328527	-1.05722	-0.666358	0.240708	-1.00881	-0.750768	0.30296	0.143183	0.378157	0.492894	0.0831779	0.3533	0.0990752
MLT1E1	ERVL-MaLR	LTR	-0.371058	-0.318902	0.242032	0.113269	-0.301058	-0.0239646	-0.0932414	-0.306005	-0.337296	-0.245149	0.211124	-0.0562625	-1.30536	0.0922611	-0.0630399	-0.279473	-0.349107	0.213883	-0.0696196	-0.0835824
MLT1E1-int	ERVL-MaLR	LTR	-0.476941	-1.21772	0.407569	0.243906	-0.188559	0.164346	0.033071	-0.100921	-0.810616	-0.753356	0.0673089	0.207874	-1.4556	-0.162118	0.34884	-0.249843	-0.0627839	0.21108	-0.0589453	-0.0778489
MLT1E1A	ERVL-MaLR	LTR	-0.299951	-0.469303	0.211547	0.0742087	-0.313194	-0.0452458	-0.132617	-0.365822	-0.362215	-0.270839	0.305329	-0.108973	-1.37931	0.0433399	-0.050326	-0.328095	-0.317951	0.199834	-0.141139	-0.113236
MLT1E1A-int	ERVL-MaLR	LTR	-0.500273	-0.860682	-0.282858	0.507162	-0.217563	-0.0896135	0.0828505	0.122771	-0.715164	-0.65512	-0.265103	0.24224	-1.05468	-0.271489	1.1928	-0.196265	-0.596553	0.331862	0.321141	0.328141
MLT1E2	ERVL-MaLR	LTR	-0.33189	-0.570809	0.0587462	0.111966	-0.265671	0.0921614	-0.12301	-0.185662	-0.419438	-0.349612	0.188048	-0.0980723	-1.19745	-0.0281235	0.0689129	-0.277953	-0.255503	0.163826	-0.0672624	-0.0630249
MLT1E2-int	ERVL-MaLR	LTR	-0.288595	-0.488677	0.0954897	0.18156	-0.189108	-0.0890414	-0.0684561	-0.287287	-0.624177	-0.528685	0.261204	-0.0910616	-0.965271	0.24451	0.265537	-0.288864	0.0966739	0.192273	-0.03822	0.00258988
MLT1E3	ERVL-MaLR	LTR	-0.243786	0.0474813	0.150754	0.222021	-0.305449	0.093773	-0.205956	-0.12351	-0.357125	-0.365181	0.223724	-0.0427481	-1.30768	-0.00439837	0.0429717	-0.387928	-0.19986	0.127908	-0.11889	-0.156685
MLT1E3-int	ERVL-MaLR	LTR	-0.272634	0.468599	0.0529655	0.373334	-0.0336856	0.388192	-0.208199	0.482484	-0.830267	-0.764735	0.0418546	-0.285898	-1.1211	-0.0985516	0.275231	-0.206465	-0.0178807	0.439816	0.150371	0.0720468
MLT1F	ERVL-MaLR	LTR	-0.322473	-0.0953338	0.292982	0.162481	-0.386358	-0.0895861	-0.209688	-0.140319	-0.356032	-0.533975	0.293428	-0.127465	-1.49817	0.141779	-0.0891901	-0.302219	-0.192755	0.132814	-0.195477	-0.117525
MLT1F-int	ERVL-MaLR	LTR	-0.349393	-0.531004	0.0886671	0.0863788	-0.222445	0.0348179	-0.0891971	-0.200052	-0.885242	-0.542462	0.0758206	-0.217448	-1.27724	0.194941	0.111776	-0.229195	-0.351343	-0.1232	-0.0387075	-0.0125956
MLT1F1	ERVL-MaLR	LTR	-0.2913	0.247479	0.215252	0.0715868	-0.317134	0.0401782	-0.116819	-0.154045	-0.445895	-0.249845	0.225196	-0.172801	-1.40025	0.124309	-0.0605455	-0.266782	-0.119135	0.0883175	-0.128838	-0.0979551
MLT1F1-int	ERVL-MaLR	LTR	-0.356173	-0.50866	0.12305	-0.0375881	-0.188524	-0.0634226	0.116044	-0.170306	-0.622825	-0.499505	0.23743	-0.193645	-0.887402	0.365929	0.100058	-0.39713	-0.412572	-0.139961	0.0460611	0.0867427
MLT1F2	ERVL-MaLR	LTR	-0.266249	-0.128741	0.302316	0.168996	-0.321534	0.0214604	-0.143696	-0.206496	-0.286519	-0.259609	0.254156	-0.206401	-1.40497	0.0777973	-0.044913	-0.343144	-0.267194	0.184711	-0.183388	-0.156846
MLT1F2-int	ERVL-MaLR	LTR	-0.067074	-0.228065	0.089828	0.337189	-0.215512	0.0684641	-0.0249789	-0.38557	-0.59322	0.06919	0.0971768	-0.15655	-1.2458	0.108437	0.273759	-0.379961	-0.0453746	0.22907	0.0445483	0.0313242
MLT1G	ERVL-MaLR	LTR	-0.30044	0.0426959	0.23578	0.132742	-0.351327	-0.0260801	-0.150919	-0.124651	-0.383764	-0.36036	0.220936	-0.166767	-1.53748	0.0116641	-0.0150317	-0.283644	-0.18692	0.200502	-0.207564	-0.136868
MLT1G-int	ERVL-MaLR	LTR	-0.195712	0.492553	0.069556	-0.0575972	-0.270233	-0.132436	-0.189253	-0.58118	-0.704738	-0.677415	0.170344	-0.155741	-1.28978	0.129765	0.0728406	-0.204637	-0.115082	0.0315581	0.00985546	0.0699366
MLT1G1	ERVL-MaLR	LTR	-0.28248	-0.183209	0.256499	0.217713	-0.423413	-0.0574545	-0.21273	-0.11926	-0.324986	-0.406473	0.267436	-0.142665	-1.28712	0.0406467	0.0140935	-0.360644	-0.105035	0.178747	-0.152245	-0.124435
MLT1G1-int	ERVL-MaLR	LTR	-0.230445	-0.696262	0.0956918	0.132739	-0.269086	-0.170768	-0.0101213	-0.330491	-0.769117	-0.684154	0.146756	-0.169028	-1.32869	0.283587	0.146451	-0.358071	-0.599715	-0.118777	-0.0241881	0.0598002
MLT1G3	ERVL-MaLR	LTR	-0.245814	-0.147248	0.257872	0.136926	-0.363047	-0.0100342	-0.232564	-0.112469	-0.303897	-0.436222	0.238033	-0.155425	-1.39306	0.0365011	-0.0689162	-0.309159	-0.191526	0.168121	-0.14873	-0.124366
MLT1G3-int	ERVL-MaLR	LTR	-0.320243	-0.574504	0.04333	-0.0548436	-0.0765149	0.27374	0.077394	-0.212344	-0.709933	-0.561584	0.0398401	-0.196832	-1.2226	0.212046	-0.0821248	-0.313506	-0.293444	-0.224858	0.0546133	0.192934
MLT1H	ERVL-MaLR	LTR	-0.302724	-0.300174	0.292653	0.137456	-0.339903	-0.0349406	-0.188482	-0.265657	-0.381837	-0.409083	0.250629	-0.161702	-1.52056	-0.0420202	-0.128346	-0.328432	-0.140897	0.152932	-0.231503	-0.212337
MLT1H-int	ERVL-MaLR	LTR	-0.407813	-1.07927	0.0188318	0.0516444	-0.277598	-0.090453	0.0214259	-0.470668	-0.717987	-0.463503	0.112466	-0.150395	-1.22297	0.0577204	0.0488931	-0.254728	-0.4411	-0.00487678	-0.00239285	0.073157
MLT1H1	ERVL-MaLR	LTR	-0.33867	-0.18694	0.263438	0.12858	-0.321899	-0.0548214	-0.128196	-0.131658	-0.423532	-0.503943	0.253883	-0.189309	-1.45693	-0.00542342	0.0297104	-0.350975	-0.326208	0.160763	-0.129421	-0.10021
MLT1H1-int	ERVL-MaLR	LTR	-0.349915	-0.922856	0.293095	-0.147878	-0.152796	-0.317405	0.169998	-0.421861	-0.727085	-0.583998	0.3416	-0.156916	-1.45526	-0.0806684	0.0941808	-0.263487	-0.545926	0.278946	0.0246003	0.144174
MLT1H2	ERVL-MaLR	LTR	-0.290956	-0.365158	0.233355	0.172768	-0.325532	-0.0812112	-0.159255	-0.1755	-0.370465	-0.416948	0.236739	-0.170426	-1.50799	0.0226881	-0.138302	-0.321942	-0.246325	0.178583	-0.249828	-0.20379
MLT1H2-int	ERVL-MaLR	LTR	-0.31983	-1.03573	0.145235	-0.029255	-0.342922	-0.334705	-0.149616	-0.386631	-0.747006	-0.309367	0.187209	-0.154636	-1.22111	0.0815048	0.0731411	-0.192597	-0.363071	0.0241418	-0.0991148	0.0332627
MLT1I	ERVL-MaLR	LTR	-0.325259	-0.271404	0.104577	0.21308	-0.330692	-0.0942627	-0.159906	-0.155898	-0.330094	-0.200712	0.159496	-0.0807868	-1.48854	-0.0714799	-0.0384066	-0.25287	-0.215973	0.224279	-0.231704	-0.159185
MLT1I-int	ERVL-MaLR	LTR	-0.247236	-0.437672	0.0484238	0.102158	-0.390249	-0.164124	-0.180116	-0.280194	-0.64688	-0.552002	-0.128266	-0.15233	-1.21539	-0.195457	0.206535	-0.145671	-0.228653	0.0420746	0.0719009	0.0718866
MLT1J	ERVL-MaLR	LTR	-0.347949	-0.193027	0.0849304	0.309231	-0.32706	-0.0802053	-0.153303	-0.0922591	-0.497592	-0.317392	0.0805199	-0.104577	-1.27922	0.0461692	0.0688557	-0.268452	-0.105245	0.0855354	-0.184583	-0.116731
MLT1J-int	ERVL-MaLR	LTR	-0.342703	-0.866036	-0.105401	0.158254	-0.330635	-0.0478328	-0.288806	-0.397967	-0.617506	-0.577394	-0.0319027	-0.0842485	-1.2204	-0.170809	0.110795	-0.304096	-0.249747	0.114654	-0.124794	-0.133088
MLT1J1	ERVL-MaLR	LTR	-0.349971	-0.234089	0.149214	0.217569	-0.353866	-0.0909553	-0.18843	-0.223442	-0.407766	-0.242717	0.0464221	-0.102908	-1.39435	-0.0885352	-0.0306734	-0.300477	-0.24343	0.260715	-0.212077	-0.171534
MLT1J1-int	ERVL-MaLR	LTR	-0.364294	0.0768822	-0.0892768	0.104483	-0.31435	-0.0233628	-0.201498	-0.478865	-0.492526	-0.151676	-0.181792	-0.0556967	-1.26583	-0.0648795	-0.032766	-0.371773	-0.263931	0.249685	-0.0423901	-0.00955973
MLT1J2	ERVL-MaLR	LTR	-0.290677	-0.270377	0.114271	0.196388	-0.371439	-0.10675	-0.166896	-0.151149	-0.365514	-0.38374	0.185489	-0.0951061	-1.31534	-0.0419987	0.0155945	-0.291512	-0.233609	0.248118	-0.221431	-0.146677
MLT1J2-int	ERVL-MaLR	LTR	-0.426081	-0.631801	-0.128097	0.170468	-0.313642	-0.0370459	-0.131913	-0.35588	-0.643629	-0.558061	-0.0836844	-0.225621	-1.29967	-0.247762	0.085313	-0.26699	-0.365429	0.11573	-0.157673	-0.0736593
MLT1K	ERVL-MaLR	LTR	-0.30657	-0.182237	0.0299174	0.423219	-0.36581	0.0355439	-0.247347	-0.058693	-0.502341	-0.3677	0.0100593	-0.125328	-1.35005	-0.0993596	0.153947	-0.283105	-0.0357297	0.196296	-0.190621	-0.182836
MLT1K-int	ERVL-MaLR	LTR	0.0382707	-0.388311	0.213998	0.384441	-0.165323	-0.0942913	-0.187297	-0.269575	-0.845162	-0.795547	-0.0125132	-0.194456	-1.42573	-0.158849	0.107254	-0.453612	3.85953e-05	0.266924	-0.202582	-0.274462
MLT1L	ERVL-MaLR	LTR	-0.348585	-0.0489926	0.00943805	0.311739	-0.309217	0.0157087	-0.169347	-0.141353	-0.471223	-0.299814	0.061074	-0.122242	-1.32326	-0.0421343	0.0710242	-0.264781	-0.0606202	0.184162	-0.178357	-0.139124
MLT1L-int	ERVL-MaLR	LTR	-0.196343	-1.20037	0.176709	0.488682	-0.203218	0.0945498	-0.151692	-0.243818	-0.30772	-0.434052	0.141127	-0.420411	-0.712757	-0.0648084	0.328936	-0.393016	-0.21514	-0.517798	-0.237375	-0.158875
MLT1M	ERVL-MaLR	LTR	-0.255674	0.195779	0.0769057	0.314029	-0.304695	0.132162	-0.32225	-0.172051	-0.343607	-0.408897	0.0337684	-0.187228	-1.36197	-0.172394	-0.0295073	-0.272028	0.0562283	0.108214	-0.147586	-0.190596
MLT1N2	ERVL-MaLR	LTR	-0.340148	-0.235645	-0.00272856	0.419489	-0.378174	0.0282226	-0.292631	-0.099414	-0.359492	-0.257081	0.0777287	-0.0990559	-1.35311	-0.0852848	0.16168	-0.230842	0.00958309	0.218728	-0.112649	-0.0918442
MLT1N2-int	ERVL-MaLR	LTR	-0.100892	-1.03312	-0.171489	0.383584	-0.438676	-0.119703	0.0157295	-0.0833495	-0.546937	-0.588063	0.310472	0.138777	-1.5878	-0.186848	0.245206	-0.225357	-0.0193637	0.449496	-0.025734	-0.0958505
MLT1O	ERVL-MaLR	LTR	-0.343478	0.0205208	-0.0128882	0.390252	-0.321792	0.14732	-0.345475	-0.20115	-0.394123	-0.257828	-0.0813918	-0.11434	-1.36077	-0.174197	0.0874836	-0.340152	-0.078905	0.121113	-0.144542	-0.133459
MLT1O-int	ERVL-MaLR	LTR	-0.993	-0.287974	0.0490729	-0.200629	0.699169	0.510053	0.0947225	-0.19313	-0.581644	-1.20247	0.029291	-0.57972	-0.313675	-0.64644	-0.237143	-0.102099	-0.416831	0.0231831	-0.0704733	0.564145
MLT2A1	ERVL	LTR	-0.410706	-0.820332	0.333506	-0.0378352	-0.508793	-0.260454	-0.0326484	-0.204895	-0.529621	-0.0695054	0.236165	0.119777	-1.39527	0.0521297	-0.256214	-0.398684	-0.611055	0.135924	-0.135612	-0.105793
MLT2A2	ERVL	LTR	-0.344349	-0.747892	0.312897	0.0196902	-0.429503	-0.171038	-0.128514	-0.296527	-0.352099	-0.274659	0.355206	0.00363003	-1.44319	0.0118968	-0.107963	-0.394745	-0.466976	0.252987	-0.197222	-0.156214
MLT2B1	ERVL	LTR	-0.38737	-0.838508	0.129299	0.131133	-0.393536	-0.120409	-0.173067	-0.335753	-0.491706	-0.216937	0.101649	-0.101887	-1.42151	-0.0563768	0.0248016	-0.289138	-0.424091	0.159834	-0.165481	-0.112327
MLT2B2	ERVL	LTR	-0.404417	-0.713298	0.12077	0.194323	-0.433858	-0.163225	-0.160693	-0.247515	-0.536559	-0.268696	0.097558	-0.0864369	-1.38465	-0.0437317	0.0993491	-0.400504	-0.325721	0.132451	-0.169507	-0.0871234
MLT2B3	ERVL	LTR	-0.379365	-0.678138	0.235554	0.0913595	-0.414181	-0.0849873	-0.139426	-0.270041	-0.389796	-0.432137	0.304846	-0.120278	-1.38231	0.0125735	0.0359128	-0.362468	-0.496074	0.228043	-0.109686	-0.0744008
MLT2B4	ERVL	LTR	-0.334639	-0.373415	0.141933	0.125472	-0.333596	-0.023223	-0.11772	-0.364568	-0.619699	-0.293883	0.153623	-0.105295	-1.43647	0.0657181	-0.10593	-0.349718	-0.390635	0.0746156	-0.177117	-0.151563
MLT2B5	ERVL	LTR	-0.228334	0.206622	0.341613	0.0678981	-0.508907	-0.241253	-0.238039	-0.59501	-0.260778	-0.134376	0.383023	-0.200833	-1.32053	0.0834538	0.153081	-0.249521	-0.364405	0.299262	-0.128212	-0.100548
MLT2C1	ERVL	LTR	-0.39955	-0.368678	-0.000241257	0.109947	-0.385603	-0.0658187	-0.139909	-0.251133	-0.66292	-0.340852	-0.030577	-0.0897177	-1.29544	-0.132611	0.124542	-0.195731	-0.24289	0.155972	-0.0487339	-0.00547987
MLT2C2	ERVL	LTR	-0.344885	-0.284599	-0.115996	0.0963515	-0.418461	-0.00434411	-0.141472	-0.243257	-0.694402	-0.344862	-0.128957	-0.0557375	-1.21727	-0.185177	0.0105923	-0.323628	-0.263606	0.11663	-0.137049	-0.0473343
MLT2D	ERVL	LTR	-0.376748	-0.24822	0.00864607	0.144362	-0.368933	-0.151747	-0.159565	-0.355456	-0.691305	-0.360046	-0.0304661	-0.0984263	-1.26374	-0.110026	0.0214636	-0.239958	-0.19829	0.159145	-0.0480882	-0.00473837
MLT2E	ERVL	LTR	-0.377154	-0.887846	0.0202713	0.35147	-0.271489	0.139666	-0.141457	0.0136166	-0.515419	-0.467514	0.0214364	-0.166814	-1.3042	-0.191927	0.199966	-0.449412	-0.627696	0.219618	0.0343643	-0.0572249
MLT2F	ERVL	LTR	-0.205903	-0.35995	0.229473	0.187546	-0.275658	-0.0254541	-0.244426	-0.270808	-0.127955	-0.436341	0.226117	-0.159084	-1.0828	-0.0500962	0.0245367	-0.312923	-0.261161	0.21284	-0.203684	-0.175668
MST-int	ERVL-MaLR	LTR	-0.0616177	-1.29728	0.56771	0.0872141	-0.0359622	-0.21939	0.267562	-0.113842	-0.311503	-0.677301	0.900236	-0.0583403	-0.857765	0.384263	0.0518636	-0.210521	-0.239453	0.256097	-0.0397218	0.137994
MSTA	ERVL-MaLR	LTR	-0.265029	-0.770298	0.410645	0.0244553	-0.203503	-0.143467	0.090818	-0.266968	-0.455141	-0.367892	0.475079	-0.0336786	-1.40777	0.317123	-0.0863586	-0.33086	-0.432874	0.18292	-0.0261379	0.0433737
MSTA-int	ERVL-MaLR	LTR	-0.0961523	-1.37136	0.892213	-0.025021	-0.0157892	-0.496748	0.448435	-0.287584	-0.298267	-0.882925	1.13167	-0.255724	-1.4053	0.633562	-0.0422805	-0.372302	-0.637285	0.227536	0.0549298	0.152792
MSTA1	ERVL-MaLR	LTR	-0.41651	-0.745863	0.251359	0.0685021	-0.169338	0.0953948	0.0883067	-0.168897	-0.566126	-0.445595	0.481228	-0.148501	-1.13808	0.2999	-0.100581	-0.552285	-0.359116	0.0428034	0.0541742	-0.00589167
MSTA1-int	ERVL-MaLR	LTR	-0.37474	-1.22246	0.344632	-0.0725017	-0.294703	-0.227155	-0.0244648	-0.687882	-0.801134	-1.09415	0.783984	-0.22548	-1.57449	0.684943	-0.00929645	-0.831675	-0.908485	0.120326	0.126924	0.233719
MSTB	ERVL-MaLR	LTR	-0.291337	-0.699803	0.406416	0.0634232	-0.273244	-0.131887	0.0337158	-0.231709	-0.449279	-0.448933	0.469304	-0.0594692	-1.47045	0.335738	-0.159247	-0.306358	-0.359181	0.170049	-0.0561798	-0.0157841
MSTB-int	ERVL-MaLR	LTR	-0.23593	-1.30842	0.714028	0.0469836	-0.17252	-0.27656	0.184439	-0.39896	-0.346102	-0.866078	1.0336	-0.276931	-1.47535	0.396205	0.0409462	-0.455094	-0.707937	0.187674	0.0236974	0.0836164
MSTB1	ERVL-MaLR	LTR	-0.314564	-0.65227	0.265801	0.146711	-0.202871	0.109139	-0.029154	-0.291911	-0.467528	-0.375489	0.292694	-0.107058	-1.43747	0.20145	-0.123484	-0.24034	-0.262674	0.113095	-0.0144979	-0.0223438
MSTB1-int	ERVL-MaLR	LTR	-0.15962	-1.27467	0.52569	0.0933596	-0.126667	-0.062597	0.173772	-0.247306	-0.421771	-0.877881	0.639076	-0.271242	-1.51998	0.459666	-0.0435231	-0.58593	-0.91934	0.0895147	-0.0306803	0.039342
MSTB2	ERVL-MaLR	LTR	-0.241975	-0.548571	0.241436	0.0973611	-0.216929	-0.0485446	-0.0450861	-0.266826	-0.403736	-0.469736	0.393142	-0.168759	-1.38796	0.199116	-0.181337	-0.24255	-0.293331	0.225408	-0.11514	-0.0785026
MSTB2-int	ERVL-MaLR	LTR	-0.391179	-1.26211	0.404117	-0.107731	0.00697947	-0.506771	0.285768	-0.271934	-0.402536	-0.985847	0.795368	-0.362984	-1.46404	0.147316	-0.0498136	-0.326362	-0.701484	0.135048	0.155851	0.255309
MSTC	ERVL-MaLR	LTR	-0.380239	-0.451642	0.0335354	0.0820901	-0.262539	-0.168588	-0.0879612	-0.25618	-0.586563	-0.437721	0.026241	-0.119402	-1.14663	0.0865924	0.00678682	-0.26351	-0.243275	0.0510564	0.0502132	0.0835736
MSTC-int	ERVL-MaLR	LTR	-0.177544	-0.591979	0.350657	0.199276	-0.198299	0.0225978	0.0382031	-0.569475	-0.578724	-0.769749	0.426208	-0.274007	-1.53422	0.325034	-0.00951062	-0.43974	-0.680579	0.169892	-0.0891679	-0.0262022
MSTD	ERVL-MaLR	LTR	-0.319772	-0.389001	0.155627	0.147293	-0.212485	-0.14657	-0.0155478	-0.262749	-0.509591	-0.407059	0.297212	-0.0535603	-1.24583	0.226335	-0.036839	-0.305845	-0.296337	0.0737606	-0.0493786	-0.00964336
MSTD-int	ERVL-MaLR	LTR	-0.279594	-0.668918	0.235395	0.160094	-0.32613	-0.172041	-0.0810266	-0.404756	-0.61579	-0.78266	0.351689	-0.234646	-1.33975	0.100549	0.0499607	-0.394995	-0.584828	0.163406	0.029916	0.0640129
MamGyp-int	Gypsy	LTR	0.175404	-0.317158	-0.0986472	0.351277	-0.0118362	-0.17923	-0.322052	0.106059	0.748263	0.284443	-0.175954	-0.085567	0.464	-0.228278	0.302701	0.187915	-0.0628692	0.15677	-0.0613151	-0.019734
MamGypLTR1a	Gypsy	LTR	-0.478172	-0.0335069	-0.0140587	0.38302	-0.342794	0.0266648	-0.269497	-0.162898	-0.403669	0.105689	-0.0445359	-0.0486442	-1.37251	-0.311151	0.266354	-0.203382	-0.18819	0.130163	-0.168825	-0.153099
MamGypLTR1b	Gypsy	LTR	-0.269693	0.348494	-0.0509873	0.353605	-0.37132	0.162832	-0.259683	-0.174735	-0.451427	-0.417337	-0.0498046	-0.19265	-1.25511	-0.35964	0.257524	-0.290515	-0.204484	0.234895	-0.078177	-0.0490224
MamGypLTR1c	Gypsy	LTR	-0.315571	-0.288074	-0.00365819	0.45221	-0.367571	-0.0697576	-0.22823	-0.218335	-0.666333	-0.600163	-0.186198	-0.0968941	-1.20005	-0.336132	0.412008	-0.360381	-0.295092	0.329443	-0.100561	-0.0602927
MamGypLTR1d	Gypsy	LTR	-0.382242	-0.0377183	-0.123303	0.462533	-0.431266	0.137313	-0.326984	-0.141453	-0.607261	-0.241939	-0.17597	-0.130153	-1.31626	-0.365483	0.226052	-0.222315	0.0600199	0.358768	-0.0533708	-0.137744
MamGypLTR2b	Gypsy	LTR	-0.359514	-0.6093	-0.0820184	0.365753	-0.286834	-0.192306	-0.219257	-0.0176635	-0.693461	-0.504141	-0.239329	-0.152898	-1.23883	-0.324398	0.400522	-0.316889	-0.425761	0.343772	-0.0342051	-0.0950588
MamGypLTR2c	Gypsy	LTR	-0.317374	-0.208541	0.0127293	0.269881	-0.388588	0.0465062	-0.233804	-0.23828	-0.486663	-0.504418	-0.0414046	-0.190947	-1.18391	-0.231384	0.203478	-0.332751	-0.084546	0.213879	-0.0351673	-0.0556607
MamGypLTR3	Gypsy	LTR	0.00871327	-0.602097	0.282496	0.279715	0.01055	0.193709	-0.207902	-0.237944	0.0387528	-0.0589621	0.270264	-0.146441	-0.815777	-0.183469	-0.0923446	-0.0822969	-0.161652	0.223987	-0.209032	-0.286291
MamGypLTR3a	Gypsy	LTR	-0.276663	-0.45935	0.182711	0.275024	-0.217527	0.0620504	-0.0339296	0.024474	-0.452835	-0.423983	0.122152	-0.144994	-1.4335	-0.0272166	0.121365	-0.200963	-0.211078	0.269224	-0.191206	-0.118478
MamGypsy2-I	Gypsy	LTR	-0.471925	0.0460807	-0.262515	0.0162842	-0.33939	-0.137134	-0.164854	-0.342122	-0.466419	-0.125223	-0.219582	-0.0898547	-1.26199	-0.386243	0.021917	-0.228886	-0.22182	0.109997	-0.14398	-0.083601
MamGypsy2-LTR	Gypsy	LTR	-0.358849	-0.0463483	-0.279673	0.0135685	-0.184143	0.238176	-0.182061	-0.197842	-0.532072	-0.128107	-0.411826	-0.154316	-1.09252	-0.596292	-0.0227241	-0.215629	0.143855	0.0231446	-0.154781	-0.185547
MamRTE1	RTE-BovB	LINE	-0.188892	0.159428	-0.302702	-0.0293257	-0.240836	0.166628	-0.225747	-0.331726	-0.00740591	0.292723	-0.270802	-0.113994	-0.760986	-0.368378	-0.277183	-0.1676	0.197547	-0.0143883	-0.160731	-0.186811
MamRep1151	LTR	LTR	-1.00666	-0.336243	-0.892607	-0.332293	-0.55788	-0.336877	0.00430964	-0.460728	-1.27976	-0.31502	-1.03933	0.0542904	-0.216952	-0.714107	0.478071	-0.164557	-0.373275	-0.207806	-0.116304	-0.0830914
MamRep1161	TcMar-Tigger	DNA	-0.9097	-0.471689	-1.5128	0.265284	-0.430911	0.138206	0.136703	-0.0770292	-2.07256	-1.22833	-0.846667	-0.543499	-1.19519	-1.33215	-0.685684	0.0327818	-2.27397	-0.667772	0.393218	0.709196
MamRep137	TcMar-Tigger	DNA	-0.419725	-0.0809317	-0.329006	0.0865242	-0.466773	0.0392747	-0.251707	-0.326642	-0.358793	-0.170603	-0.309512	-0.130459	-1.17607	-0.225881	-0.0809754	-0.14106	0.0727495	-0.0906734	-0.131344	-0.115921
MamRep1527	LTR	LTR	-0.407784	-0.582874	0.0199923	0.22631	-0.340525	-0.0989542	-0.26562	-0.396214	-0.435368	-0.134363	-0.192024	-0.154944	-1.28717	-0.411169	0.126263	-0.222239	-0.220337	0.208621	-0.174877	-0.112533
MamRep1879	hAT-Tip100	DNA	0.140129	0.0781732	-0.213594	0.482452	0.289841	0.148562	-0.263768	0.539074	0.439419	-0.126012	-0.315538	0.104706	0.660159	-0.254485	0.377769	0.168384	0.262953	0.310906	0.136898	0.0282779
MamRep1894	hAT	DNA	-0.487402	-0.294881	-0.194278	0.13973	-0.46577	-0.199698	-0.215318	-0.299993	-0.462052	-0.335453	-0.282786	-0.175086	-1.42963	-0.26067	0.0859463	-0.338326	0.0895154	0.263835	-0.216763	-0.161817
MamRep38	hAT	DNA	-0.363241	-0.040572	0.126195	0.331867	-0.320573	0.0153787	-0.329517	-0.0780492	-0.211874	-0.1607	-0.00489347	0.0116821	-1.39604	-0.345581	0.0742535	-0.305293	0.0539935	0.255223	-0.0461179	-0.0591217
MamRep4096	hAT-Tip100	DNA	-0.267523	0.0139446	-0.442804	0.218542	-0.251618	-0.159848	-0.300409	0.319229	-0.269504	0.0156186	-0.496335	0.138516	0.00237727	-0.462616	0.489493	-0.202349	0.100195	-0.0404591	0.199766	-0.047619
MamRep434	TcMar-Tigger	DNA	-0.49849	0.226421	-0.576438	0.0762804	-0.279201	0.119583	-0.123004	-0.314344	-0.703148	-0.142321	-0.759178	-0.102462	-0.672729	-0.548434	0.399888	-0.148643	0.0449172	0.00253449	-0.0869539	-0.0268475
MamRep488	hAT-Tip100	DNA	0.214842	0.0501043	-0.118311	0.627989	0.00661838	-0.125752	-0.338742	0.52299	0.416387	-0.12133	-0.235552	-0.0180164	0.437259	-0.208135	0.52911	-0.0207633	0.377394	0.192911	-0.0581556	-0.166843
MamRep564	Unknown	Unknown	-0.424529	0.152423	-0.461134	0.462644	-0.312339	-0.236269	-0.221403	0.112124	-0.317187	0.202179	-0.549113	-0.0405864	-1.15945	-0.692216	0.367552	-0.18874	0.0129854	-0.0871554	-0.0723845	0.105763
MamRep605	LTR	LTR	-0.32702	0.0784534	-0.266064	0.114537	-0.350777	0.0552596	-0.220323	-0.266736	-0.386615	-0.0489209	-0.22433	-0.0928998	-1.04515	-0.282261	-0.0211525	-0.196483	0.0658766	0.0888369	-0.172007	-0.112316
MamSINE1	tRNA-RTE	SINE	-0.252477	0.365952	-0.220408	-0.0303688	-0.28804	0.0946901	-0.261144	-0.279132	-0.0630522	0.0891541	-0.253548	-0.0614325	-0.977482	-0.352685	-0.327681	-0.0611267	0.227022	-0.037687	-0.224585	-0.232654
MamTip1	hAT-Tip100	DNA	0.115345	0.667376	-0.38573	0.312137	-0.14047	0.00628268	-0.288272	0.223094	0.000868007	0.0879718	-0.407181	0.0942707	0.380407	-0.514834	0.489422	-0.0322278	0.106275	0.096605	0.0487509	0.109753
MamTip2	hAT-Tip100	DNA	-0.284997	0.195443	-0.240035	0.391797	-0.23483	0.11659	-0.286396	0.0274702	-0.287343	0.183962	-0.299488	-0.0544866	-0.896934	-0.448409	0.333897	-0.152683	0.0218509	0.123207	-0.117139	-0.0634642
MamTip3	hAT-Tip100	DNA	-0.132311	-0.365692	0.0598035	0.620475	-0.194841	0.14979	-0.262602	-0.281367	-0.100756	-0.0202562	0.0128951	-0.0889845	-0.473134	-0.182901	0.327925	0.0633985	0.126319	0.440535	-0.145082	-0.186638
Mam_R4	Dong-R4	LINE	-0.581879	-0.158757	-0.532465	0.0293244	-0.287812	-0.097722	-0.195124	-0.277284	-0.360127	0.386799	-0.493339	-0.0944871	-1.14844	-0.350309	0.254928	-0.0851743	-0.152309	-0.064983	-0.101683	-0.247796
Merlin1_HS	Merlin	DNA	-0.142673	-0.576365	-0.0163758	0.444846	-0.414972	-0.149932	0.132471	-0.416873	-0.47749	-0.508092	-0.182499	-0.0938112	-1.30706	0.200546	0.0489105	0.0355324	-0.365085	0.0258875	-0.438646	-0.201288
ORSL	hAT-Tip100	DNA	-0.0772409	0.0828174	-0.27526	0.416487	-0.45345	-0.10119	-0.14996	0.310342	-0.717473	-0.190993	-0.619654	0.0574495	-0.278497	-0.351673	0.372003	-0.122624	-0.105606	0.149678	0.28054	0.286929
ORSL-2a	hAT-Tip100	DNA	-0.181506	-0.0406117	-0.385672	0.233777	-0.170032	-0.0793596	-0.153844	0.129017	-0.604776	-0.330811	-0.557749	-0.194443	-0.201857	-0.323746	0.492439	0.0162816	-0.0890134	0.0492006	0.107923	-0.109099
ORSL-2b	hAT-Tip100	DNA	-0.270481	-0.0324167	-0.725166	0.16513	-0.216402	-0.223743	-0.172469	-0.0856725	-0.563002	-0.178761	-0.855093	0.0187256	0.390616	-0.562261	0.573653	0.0536376	-0.119903	-0.180612	0.155759	0.0939798
OldhAT1	hAT-Ac	DNA	-0.0168101	0.216094	-0.106817	0.204687	-0.0608337	0.0947787	-0.130655	-0.0346122	0.0555362	0.171084	-0.327473	-0.0398431	-0.304678	-0.337614	-0.0514072	-0.108124	0.0717453	0.145021	-0.124738	-0.144766
PABL_A	ERV1	LTR	-0.285773	-0.417981	-0.208574	0.0752492	-0.00881467	1.15077	-0.330133	-0.540836	-0.706576	-0.396537	-0.257934	-0.0385091	-0.784954	-0.517028	0.187977	-0.237909	-0.283792	-0.228191	0.369166	0.0762345
PABL_A-int	ERV1	LTR	-0.600574	-0.99309	0.106351	-0.159499	-0.0161233	-0.214764	0.415571	-0.423474	-1.03495	-0.474851	0.247911	0.0671854	-0.961979	0.556759	0.32174	-0.19689	-0.441533	-0.020042	-0.0283261	0.111501
PABL_B	ERV1	LTR	-0.146474	0.428731	-0.0895343	0.0687469	-0.0536368	0.652996	-0.113233	-0.327335	-0.453748	-0.263686	-0.174405	-0.0176715	-0.52503	-0.533513	0.336312	-0.219333	-0.306464	-0.0633277	0.206735	-0.0145534
PABL_B-int	ERV1	LTR	-0.202377	-0.946387	0.240468	0.418062	-0.197588	-0.0991645	-0.153394	-0.1229	-0.443554	-0.616229	0.135922	-0.270392	-1.48543	-0.390176	0.165191	-0.224986	-0.511842	0.2553	-0.10569	-0.121913
PRIMA4-int	ERV1	LTR	-0.21456	-0.94257	0.144861	0.408928	-0.196456	-0.244856	-0.0411992	-0.316471	-0.522457	-0.662865	0.121634	-0.12946	-1.11025	-0.00275455	0.227588	-0.139642	-0.320201	0.401205	-0.0276858	0.126645
PRIMA41-int	ERV1	LTR	-0.318058	-1.2453	0.28758	0.442119	-0.104124	-0.233966	0.19429	0.0474367	-0.740717	-0.922878	0.210751	-0.242711	-1.37577	-0.225838	0.586239	-0.281862	-0.512974	0.353012	-0.0255675	0.0265039
PRIMA4_LTR	ERV1	LTR	-0.136076	-0.414443	-0.138117	0.451181	-0.234159	-0.106853	-0.178937	-0.234589	-0.0939847	-0.0960373	-0.153437	-0.0654535	-0.788014	-0.307878	0.329492	-0.0498376	-0.173076	0.242192	0.210207	0.197352
PRIMAX-int	ERV1	LTR	-0.960652	-1.03975	-0.276146	0.0836301	-0.414957	-0.30044	-0.0535517	-0.213471	-1.02945	-0.442999	-0.199665	-0.0353378	-1.2796	-0.276173	0.200487	-0.92101	-1.03384	-0.00488078	-0.122392	-0.0457281
Penelope1_Vert	Penelope	LINE	-0.214671	0.343427	-0.393189	-0.115927	-0.185141	-0.00106205	-0.168173	-0.113348	-0.15329	0.351909	-0.461489	0.0388005	-0.218258	-0.396828	0.0436084	0.042507	0.0870756	0.0327078	-0.241527	-0.0761104
Plat_L3	CR1	LINE	-0.30537	0.593363	-0.491224	0.207245	-0.267634	0.131142	-0.263636	-0.171467	-0.311477	0.231304	-0.469411	-0.0555981	-0.779703	-0.357646	0.229849	-0.128212	0.193854	0.020608	-0.129143	-0.17374
PrimLTR79	ERV1	LTR	0.128895	-0.184833	-0.111212	-0.182879	-0.144455	-0.0611381	-0.313266	0.00559347	-0.123988	-0.0404187	-0.103287	-0.146148	0.300156	-0.38	-0.0295549	0.0375149	-0.135206	0.000404206	-0.241828	-0.301968
Ricksha	MULE-MuDR	DNA	-0.524918	-0.974167	-0.377448	-0.11566	-0.216308	-0.363986	0.189835	-0.401368	-0.894112	-0.520106	-0.256606	-0.24688	-0.983656	-0.378268	0.263659	-0.188622	-0.17912	-0.140967	0.218933	0.348299
Ricksha_0	MULE-MuDR	DNA	-0.602531	-1.04372	-0.428426	-0.144165	-0.355013	-0.35186	-0.0523948	-0.401442	-0.792741	-0.383823	-0.320224	0.0398005	-1.03973	-0.187803	0.143625	-0.1752	-0.460094	-0.0545294	-0.0565386	0.0387982
Ricksha_a	MULE-MuDR	DNA	-0.554837	-0.922864	-0.461591	-0.317291	-0.400272	-0.542446	0.0594841	-0.382471	-0.911282	-0.12626	-0.28997	0.316545	-1.25644	-0.563527	0.140875	0.23099	-0.517607	-0.103331	0.225849	0.297403
Ricksha_b	MULE-MuDR	DNA	-0.81607	-1.22698	-0.336589	0.0559187	-0.407547	-0.381886	-0.159867	-0.60634	-0.733542	-0.301293	-0.0148474	0.0821333	-1.4618	-0.166518	0.0885487	-0.424582	-0.604618	-0.163862	-0.106036	-0.0480458
Ricksha_c	MULE-MuDR	DNA	-0.52243	-0.903554	-0.099863	0.0204211	-0.383687	-0.23393	-0.122831	-0.292049	-0.641277	-0.286241	0.0239719	-0.0718488	-1.29171	0.0103941	0.168634	-0.357561	-0.427035	-0.00807149	-0.0869247	0.0232177
SVA_A	SVA	Retroposon	-0.0377618	-0.21681	1.17388	0.0131077	0.0933297	0.0642166	0.662634	-0.0813049	0.0261385	-0.563523	1.52519	-0.265737	-1.19586	1.17128	-0.556042	-0.271808	-0.327324	-0.136645	0.46141	0.411973
SVA_B	SVA	Retroposon	-0.190723	-0.299214	1.21242	-0.0794529	0.0276605	0.126518	0.569089	-0.260112	-0.117663	-0.629146	1.46305	-0.235614	-1.38871	1.29202	-0.688286	-0.442967	-0.173907	-0.0256949	0.505225	0.416731
SVA_C	SVA	Retroposon	-0.0709365	-0.178804	1.34318	-0.00576941	0.097211	0.236066	0.655495	-0.191597	-0.138108	-0.69909	1.49243	-0.290388	-1.32215	1.3102	-0.807373	-0.434278	-0.206618	-0.111122	0.6182	0.465202
SVA_D	SVA	Retroposon	-0.0909113	-0.109556	1.41617	0.0418354	0.251564	0.54589	0.674899	-0.0559318	-0.193201	-0.720755	1.48188	-0.260091	-1.41646	1.34363	-0.876226	-0.445735	-0.175714	-0.0846777	0.885258	0.558521
SVA_E	SVA	Retroposon	-0.0373479	-0.0654836	1.0425	0.00797629	0.193186	0.547146	0.446634	0.0975226	-0.388202	-0.544594	1.05889	-0.215962	-1.06873	1.11239	-0.783729	-0.348844	-0.166697	-0.166185	0.992761	0.600166
SVA_F	SVA	Retroposon	-0.0977427	-0.0558146	1.39226	0.0410499	0.349001	0.742077	0.687465	0.0607396	-0.334295	-0.80153	1.31182	-0.31286	-1.36571	1.30143	-0.811327	-0.444375	-0.0468199	-0.178539	1.17619	0.707799
THE1-int	ERVL-MaLR	LTR	-0.184932	-1.55235	0.773271	-0.0455453	-0.0566313	-0.449298	0.405746	-0.217548	-0.354087	-0.701079	1.10491	-0.207171	-1.58775	0.752737	-0.259041	-0.397556	-0.643758	0.34564	-0.0194452	0.130985
THE1A	ERVL-MaLR	LTR	-0.291794	-0.834765	0.324646	0.00131636	-0.12102	-0.239054	0.228614	-0.264091	-0.49064	-0.313235	0.49477	0.00544773	-1.31408	0.398535	-0.0666923	-0.302122	-0.488354	0.166704	0.0527622	0.138803
THE1A-int	ERVL-MaLR	LTR	-0.181336	-1.31238	0.787691	0.0226304	-0.11457	-0.402233	0.358535	-0.355451	-0.368647	-0.74357	1.04959	-0.192277	-1.39306	0.822865	-0.0891874	-0.380501	-0.686804	0.246592	0.0913879	0.152655
THE1B	ERVL-MaLR	LTR	-0.263441	-0.762324	0.43667	-0.0130035	-0.177812	-0.282087	0.223674	-0.273578	-0.390299	-0.321781	0.616574	0.0153436	-1.41943	0.408195	-0.189887	-0.336765	-0.461819	0.183279	-0.0165019	0.0513807
THE1B-int	ERVL-MaLR	LTR	-0.112284	-1.37433	0.915177	-0.0879023	-0.0786611	-0.497944	0.4207	-0.370615	-0.293249	-0.763419	1.1743	-0.185324	-1.44689	0.86829	-0.226408	-0.407839	-0.69999	0.222699	0.0463002	0.147618
THE1C	ERVL-MaLR	LTR	-0.310337	-0.672279	0.399668	0.00398294	-0.212625	-0.126773	0.0706913	-0.333524	-0.460945	-0.270065	0.441685	0.0221214	-1.39453	0.219382	-0.127963	-0.33352	-0.547029	0.154136	-0.0259744	0.0530494
THE1C-int	ERVL-MaLR	LTR	-0.111106	-1.32013	0.993071	-0.0979236	-0.0590443	-0.527942	0.465363	-0.355769	-0.26915	-0.795295	1.22206	-0.224729	-1.42256	0.848924	-0.255158	-0.406057	-0.666244	0.237545	0.0379744	0.127278
THE1D	ERVL-MaLR	LTR	-0.338332	-0.693503	0.31564	0.0281926	-0.217496	-0.0767395	0.0554168	-0.276797	-0.428687	-0.274761	0.393203	0.0359957	-1.39988	0.178183	-0.134215	-0.357597	-0.49786	0.137655	-0.062645	0.00612258
THE1D-int	ERVL-MaLR	LTR	-0.122184	-1.35191	0.966944	-0.0598094	-0.0394039	-0.521627	0.470536	-0.355759	-0.247577	-0.773622	1.19893	-0.213914	-1.40905	0.808183	-0.154285	-0.380225	-0.655818	0.241997	0.0873996	0.182502
Tigger1	TcMar-Tigger	DNA	-0.366478	-0.860741	0.0632956	-0.0622672	-0.22959	-0.126214	0.0441127	-0.326849	-0.617744	-0.457419	0.333024	-0.0611456	-1.17071	0.341903	-0.0800319	-0.249992	-0.415877	-0.107866	0.00577014	0.0905055
Tigger10	TcMar-Tigger	DNA	-0.36238	0.0717697	-0.55003	-0.22637	-0.330397	0.0722361	-0.227341	-0.509377	-0.471803	0.0249789	-0.443783	-0.17744	-1.00462	-0.237257	-0.347239	-0.0889996	-0.0803972	-0.243664	-0.128317	-0.0521099
Tigger11a	TcMar-Tigger	DNA	-0.438655	-0.175994	-0.410895	-0.0472146	-0.229845	0.183174	-0.0228956	-0.432464	-0.494438	-0.217369	-0.504201	-0.121151	-0.505477	-0.259617	-0.018613	-0.161385	0.132974	-0.0737851	0.023758	0.101331
Tigger12	TcMar-Tigger	DNA	-0.512909	0.10694	-0.485091	-0.140654	-0.306198	0.0284509	-0.174011	-0.60647	-0.528759	-0.29009	-0.424738	-0.13967	-1.09473	-0.172602	-0.121504	-0.227392	-0.00808619	-0.265476	-0.175497	-0.109696
Tigger12A	TcMar-Tigger	DNA	-0.258023	0.26341	-0.409207	-0.156213	-0.349035	0.0900126	-0.0929607	-0.22679	-0.408899	0.0640446	-0.377734	-0.120005	-0.920247	-0.135161	-0.126634	-0.0135247	0.142619	0.0326982	0.0527493	0.105806
Tigger12c	TcMar-Tigger	DNA	-0.307136	0.33846	-0.264968	-0.0815773	-0.33946	0.210632	-0.164734	-0.276148	-0.546421	-0.246342	-0.405049	-0.256423	-1.13091	-0.205042	-0.1637	-0.224115	0.153647	-0.18332	-0.127495	-0.102431
Tigger13a	TcMar-Tigger	DNA	-0.6124	-0.152621	-0.495836	-0.197025	-0.408101	-0.11131	-0.0801509	-0.428221	-1.02812	-0.370344	-0.576196	-0.0829928	-1.02402	-0.29857	-0.099943	-0.16181	-0.135833	-0.137821	-0.120599	-0.032468
Tigger14a	TcMar-Tigger	DNA	-0.680584	0.33479	-0.637744	-0.244404	-0.400625	-0.125753	-0.163817	-0.304641	-0.569482	0.0980637	-0.65009	0.0778693	-0.618352	-0.444926	0.143197	-0.109272	0.0333502	-0.0489368	-0.0930327	-0.0895508
Tigger15a	TcMar-Tigger	DNA	-0.243876	0.577868	-0.50034	-0.027077	-0.225397	0.178917	-0.190366	-0.332514	-0.372379	-0.0295789	-0.590024	-0.0835863	-0.659602	-0.360851	-0.0178924	-0.0696929	0.120179	-0.149193	-0.112343	-0.08495
Tigger16a	TcMar-Tigger	DNA	-0.335227	0.158731	-0.425421	0.140698	-0.270064	0.132896	-0.195829	-0.236135	-0.592715	0.0105253	-0.466638	-0.0573192	-0.827532	-0.29856	0.105456	-0.12795	0.0594455	-0.200221	-0.0379457	-0.0904941
Tigger16b	TcMar-Tigger	DNA	-0.416997	0.418634	-0.500703	0.0132371	-0.241114	0.142655	-0.2068	-0.362051	-0.584919	-0.303669	-0.41029	-0.128854	-0.972186	-0.29686	-0.0669048	-0.2517	0.242847	-0.170338	-0.0445792	0.0194425
Tigger17	TcMar-Tigger	DNA	1.08633	0.975312	-0.277652	-0.359898	0.378759	-0.148922	-0.136178	-0.499588	0.616329	0.806259	0.0150065	0.276176	0.331405	-0.00684791	-0.530041	0.53273	0.361614	-0.364375	0.024633	-0.0794113
Tigger17a	TcMar-Tigger	DNA	-0.381618	-0.170079	-0.203337	0.0185576	-0.337195	-0.0272314	-0.0816733	-0.303682	-0.517863	-0.187599	0.00482429	-0.0655217	-1.45276	-0.0504078	-0.179252	-0.274701	-0.120392	-0.0596797	-0.216244	-0.149718
Tigger17b	TcMar-Tigger	DNA	-0.219564	-0.282877	-0.273808	0.0540123	-0.444972	-0.227003	-0.0856105	-0.12723	-0.336461	-0.263747	-0.0851098	-0.00799218	-1.67041	-0.277241	-0.186466	0.212018	-0.136409	0.270345	-0.0718076	0.0183626
Tigger17c	TcMar-Tigger	DNA	-0.33211	0.0256139	-0.138799	-0.11085	-0.419352	-0.0485934	-0.196269	-0.486126	-0.576702	-0.106846	-0.076089	-0.127272	-1.34336	-0.0245763	-0.21978	-0.161843	-0.145991	-0.201026	-0.158942	0.0427327
Tigger18a	TcMar-Tigger	DNA	-0.55009	-0.129623	-0.546213	-0.0760907	-0.367606	-0.0863336	-0.101846	-0.433252	-0.462056	-0.0222861	-0.547457	-0.0556457	-0.385669	-0.241303	0.139622	-0.104394	-0.245708	-0.181164	-0.156363	-0.0804044
Tigger19a	TcMar-Tigger	DNA	-0.244365	0.261127	-0.483582	0.150085	-0.195548	0.124293	-0.211743	-0.279818	-0.281569	0.0707385	-0.593379	-0.0473449	-0.436761	-0.467916	0.0976107	-0.131406	0.189796	-0.126796	-0.030802	-0.1619
Tigger19b	TcMar-Tigger	DNA	-0.201205	0.330814	-0.342389	-0.0226954	-0.117542	0.224144	-0.141639	-0.272727	-0.160219	0.00891988	-0.406933	-0.07851	-0.575939	-0.242391	-0.0708776	-0.0145801	0.314057	-0.0554759	-0.107552	-0.0447915
Tigger1a_Art	TcMar-Tigger	DNA	-0.51992	-0.296457	-0.519575	-0.235656	-0.413046	-0.136418	0.0443641	-0.411141	-0.49045	-0.0738185	-0.145825	0.102662	-1.14958	-0.121636	-0.342571	-0.0420168	-0.205503	0.170065	-0.172074	0.0303883
Tigger1a_Mars	TcMar-Tigger	DNA	-0.552547	-0.667059	-0.38678	-0.593806	-0.197277	0.022057	0.24535	0.223679	-1.27981	-0.800959	-0.480239	-0.252473	-1.73703	0.055539	0.38968	-0.597702	-0.318451	-0.121805	-0.147461	0.121555
Tigger2	TcMar-Tigger	DNA	-0.522623	-0.883343	-0.079693	-0.108415	-0.348613	-0.0498379	0.00420108	-0.378223	-0.609497	-0.11336	0.0238126	-0.00753375	-1.17358	0.169744	-0.177751	-0.151602	-0.237826	-0.122943	0.0646627	0.135779
Tigger20a	TcMar-Tigger	DNA	-0.523545	-0.0902348	-0.441067	-0.0112672	-0.315796	0.171486	-0.153721	-0.31411	-0.713057	-0.450783	-0.497433	-0.186491	-1.14456	-0.298207	0.260223	-0.161054	0.0382173	-0.203788	-0.0220872	0.0121877
Tigger2a	TcMar-Tigger	DNA	-0.660081	-0.712599	-0.184416	-0.144021	-0.546081	-0.283567	-0.0599547	-0.395994	-0.908814	-0.204921	-0.401119	0.070224	-1.12598	0.066408	-0.160997	-0.16027	-0.389187	-0.0589083	-0.0228489	0.0386909
Tigger2b_Pri	TcMar-Tigger	DNA	-0.666236	-0.565469	-0.388405	-0.336502	-0.440909	-0.191464	-0.0209707	-0.530069	-0.674578	0.00951601	-0.3434	0.0323667	-1.20038	-0.124005	-0.360494	-0.168509	-0.37665	-0.155043	-0.0496571	0.057663
Tigger3	TcMar-Tigger	DNA	-0.410424	-0.40177	-0.175837	-0.257905	-0.552061	-0.270675	-0.0683055	-0.416195	-0.711416	-0.27233	-0.192495	0.036333	-1.29729	-0.111403	-0.316742	-0.339007	-0.376361	-0.187094	-0.107688	0.0256641
Tigger3a	TcMar-Tigger	DNA	-0.558604	-0.466913	-0.123593	-0.288927	-0.275499	-0.224592	-0.0785731	-0.349322	-0.291393	0.00216227	0.0118634	0.0185926	-1.29456	-0.144117	-0.495523	-0.179892	-0.238301	0.0103844	-0.242914	-0.152115
Tigger3b	TcMar-Tigger	DNA	-0.476311	-0.0619535	-0.255491	-0.510172	-0.610129	-0.283989	-0.0237844	-0.557767	-0.752448	-0.0652555	-0.404854	0.0883453	-1.22296	-0.169275	-0.60562	-0.159196	-0.370649	-0.169707	-0.0879159	0.0328452
Tigger3c	TcMar-Tigger	DNA	-0.445506	-0.233619	-0.117491	-0.2936	-0.35939	-0.219336	-0.0831725	-0.460148	-0.34791	-0.0124444	-0.0456379	-0.0356812	-1.19674	-0.112537	-0.471858	-0.189637	-0.305472	0.0486192	-0.152197	-0.0854987
Tigger3d	TcMar-Tigger	DNA	-0.50395	-0.449799	-0.250345	-0.285338	-0.40694	-0.440398	-0.0951346	-0.385412	-0.725833	-0.0673026	-0.228508	-0.128762	-0.828386	-6.07079e-05	-0.14009	-0.137902	-0.417892	-0.0769658	-0.183106	0.00320544
Tigger4	TcMar-Tigger	DNA	-0.451794	-0.414579	-0.189137	-0.146593	-0.402529	-0.194522	-0.154001	-0.482927	-0.345212	-0.0725919	-0.00210443	-0.0693461	-1.22267	-0.15399	-0.250127	-0.168734	-0.396019	-0.106172	0.00651792	0.114382
Tigger4a	TcMar-Tigger	DNA	-0.635792	-0.0953655	-0.637504	-0.240885	-0.268998	0.0501326	-0.0228298	-0.5136	-0.989671	-0.331544	-0.484447	-0.0758113	-0.956324	-0.158755	-0.267687	-0.200301	-0.00633024	-0.370145	0.215347	0.312078
Tigger4b	TcMar-Tigger	DNA	-0.687565	-0.243873	-0.571425	-0.368729	-0.404592	-0.22683	-0.0732992	-0.465271	-1.00031	-0.172298	-0.588823	0.0380552	-0.826848	-0.148402	-0.184453	-0.185038	-0.186065	-0.186768	0.0449504	0.120439
Tigger5	TcMar-Tigger	DNA	-0.337615	-0.656299	-0.00955781	0.0708099	-0.181421	-0.177271	0.102344	-0.178179	-0.597347	-0.341116	-0.0145813	-0.0543417	-1.1234	-0.129459	0.0170958	-0.226486	-0.459315	0.0622301	-0.187098	-0.103968
Tigger5b	TcMar-Tigger	DNA	-0.266596	-0.485377	-0.289797	-0.131899	-0.209798	-0.107026	-0.0977724	-0.381576	-0.363302	-0.297461	-0.158818	-0.0976482	-0.48894	-0.0692569	-0.153893	-0.234108	-0.123519	-0.163787	-0.114513	0.0185899
Tigger6a	TcMar-Tigger	DNA	-0.464341	-0.322705	-0.344663	-0.180866	-0.369162	-0.211963	-0.018665	-0.421343	-0.571264	-0.229496	-0.189901	-0.0827942	-1.18376	-0.304275	-0.245775	-0.186395	-0.220099	-0.134263	-0.0938207	-0.0394478
Tigger6b	TcMar-Tigger	DNA	-0.444797	-0.516753	-0.272562	0.0802963	-0.416235	-0.0990492	-0.163172	-0.447672	-0.718496	-0.192285	-0.193291	-0.00882526	-0.858727	-0.319971	0.142943	-0.124271	-0.276116	-0.116198	-0.197298	-0.0868151
Tigger7	TcMar-Tigger	DNA	-0.224064	0.556734	-0.211805	-0.262011	-0.364319	-0.0986917	-0.0773381	-0.320614	-0.551521	-0.086688	-0.082092	-0.0480959	-1.15732	0.0419422	-0.209201	-0.161774	-0.113207	-0.0561029	-0.0849743	0.0165802
Tigger8	TcMar-Tigger	DNA	-0.676877	-0.309436	-0.466284	-0.15438	-0.375519	0.0104063	-0.150596	-0.278048	-0.653618	0.132882	-0.48903	-0.0775388	-1.00872	-0.467159	-0.075099	0.0166996	-0.040043	-0.140391	-0.18332	-0.0873665
Tigger9a	TcMar-Tigger	DNA	-0.649315	-0.086937	-0.402947	-0.107282	-0.25122	0.267083	-0.0740184	-0.323581	-0.42211	-0.307327	-0.430873	-0.0954065	-0.815299	-0.280329	-0.0103791	0.0775788	0.00497782	-0.0216536	0.0046019	0.060279
Tigger9b	TcMar-Tigger	DNA	-0.549782	-0.408463	-0.376959	-0.0846224	-0.247647	0.142774	-0.039094	-0.525872	-0.483268	-0.296874	-0.180281	-0.104995	-1.24938	-0.0718573	-0.252579	-0.160414	0.0840179	-0.0365036	-0.23685	-0.0260301
UCON1	Unknown	Unknown	-0.211418	0.0301093	0.111287	0.220417	0.143423	0.631535	0.0753196	-0.285153	-0.0782732	0.365662	-0.150582	0.100797	-1.09572	-0.506507	-0.503891	0.0049676	0.152876	0.100293	-0.176222	-0.116127
UCON100	DNA	DNA	-0.303699	1.29125	-0.559752	-0.827819	-0.124708	0.175068	-1.48531	-0.398684	0.374259	0.862925	-1.88988	-0.71585	0.50664	-1.37338	1.11687	-2.37807	-0.803249	-0.839682	-1.29698	-0.683087
UCON101	Unknown	Unknown	0.288531	-1.22834	-0.484207	-0.136104	0.292907	0.625689	0.213275	-0.718382	-0.966926	-1.05765	-0.0613425	-0.121015	-0.686065	0.703101	0.51325	-0.680143	-1.3791	0.0766725	0.605054	-0.180238
UCON103	Unknown	Unknown	-0.679785	-1.31346	-0.176949	-0.395561	-0.273409	-0.986552	0.632049	-0.025226	-1.71236	-0.0286888	-0.259151	-0.709356	-1.97863	-0.539424	-1.53734	-0.327195	0.0888459	1.77868	-0.322118	-1.16321
UCON105	Unknown	Unknown	-0.351003	0.750524	-0.505819	0.0399401	-0.160917	0.283361	-0.365695	-0.274101	-0.358505	0.0347169	-0.548644	-0.0591834	-0.767683	-0.467199	0.0900602	-0.281778	0.582476	0.0252839	-0.0634021	-0.123873
UCON107	hAT-Tag1	DNA	-1.38637	-0.416363	-0.899517	-0.227264	-0.270768	-0.0739918	-0.00338906	-0.305973	-1.17851	-0.113289	-0.746125	-0.0644058	-1.03732	-0.751411	0.0918165	0.0347009	0.305241	-0.779928	-0.0175688	0.488528
UCON11	TcMar-Tigger	DNA	-0.501418	1.12569	-0.161421	0.204089	0.0647754	0.201361	0.314316	-0.261668	-0.419022	0.465204	-0.873563	-0.144639	-0.863629	-0.161548	0.368106	-0.117393	0.261223	0.612111	-0.325013	-0.391807
UCON12	Unknown	Unknown	-0.40911	0.275454	-0.479568	-0.0265191	-0.111709	0.409308	-0.484498	-0.623256	-0.199125	0.354721	-0.366409	0.14189	-0.766495	-1.05237	-0.613464	0.499184	0.228979	0.550619	0.137875	0.0450508
UCON12A	Unknown	Unknown	-0.387836	-0.397923	-0.239397	-0.0903524	-0.0184391	0.758961	-0.144981	-0.874656	-0.571612	0.212055	-1.25404	0.276367	-0.799047	-0.874027	0.0439812	0.421861	-0.607314	0.293528	-0.318832	-0.0606543
UCON132b	hAT-Tip100	DNA	-0.253771	0.249314	-0.281916	0.367401	-0.231214	0.0303785	-0.254323	-0.0255293	-0.398403	0.0372161	-0.297568	0.00044241	-0.718397	-0.503598	0.39546	-0.186847	0.0986628	0.31393	-0.125311	0.00884706
UCON14	DNA	DNA	-0.520101	0.652758	-0.482886	0.337992	-0.178147	-0.0803456	-0.455585	-0.351221	0.224142	0.717558	-0.939368	-0.0179277	-1.30142	-1.03082	0.475321	0.0267806	-0.302265	0.188475	-0.186047	-0.1947
UCON15	Unknown	Unknown	-0.85739	-0.432767	-0.668444	-0.479117	-0.486685	-0.410833	-0.696686	-0.73523	-0.592576	0.870172	-0.348965	-0.313777	-0.931217	-0.941196	-0.908668	0.470809	0.288676	-0.0235106	-0.184993	-0.415595
UCON16	Unknown	Unknown	-0.622224	0.424744	-0.526162	0.649851	0.249753	0.298143	-0.584598	-0.341997	-0.225547	0.618719	-1.19196	-0.729682	-0.0111146	-0.790472	0.726313	-0.655384	0.728922	0.701028	0.399779	0.879973
UCON17	Unknown	Unknown	-0.904806	-0.490946	-0.3038	0.0619461	-0.571543	-0.321968	-0.389938	-0.377289	-0.0629573	0.45397	-0.667211	0.316173	-2.09564	-0.684353	-0.0850482	0.459997	-0.740175	0.322845	-0.375758	0.329181
UCON18	Unknown	Unknown	-0.735637	-0.702156	-0.533567	0.455834	-0.295202	-0.344215	-0.185441	-0.527598	-0.958321	-0.0311329	-1.10139	-0.430712	-1.26403	-1.2866	0.431157	0.11687	-0.871149	-0.167106	0.0503575	0.787639
UCON19	Unknown	Unknown	-0.913653	-1.50378	-0.889003	-0.0624513	-0.4588	-1.03959	-0.638533	-1.14826	-0.53601	-0.252416	-1.05787	-0.358923	-1.35906	-0.0149667	0.90892	0.0515499	-2.02457	-0.348733	-0.423447	-0.683259
UCON2	DNA	DNA	0.0339255	0.783273	-0.46001	-0.116413	-0.0275061	0.142005	-0.360341	-0.652442	-0.242079	0.374839	-0.846863	0.0484838	-0.680426	-0.642787	-0.243311	-0.0221345	0.0913096	-0.177165	0.0314442	-0.066723
UCON20	Unknown	Unknown	-0.450193	-0.87331	-1.00203	0.352156	-0.700242	-0.0139199	-0.0520649	-0.4099	0.591797	1.11436	-0.390184	0.52022	-1.36399	-0.442733	0.109104	0.439091	0.394915	0.420545	0.0573139	-0.149933
UCON21	DNA	DNA	0.353742	1.66614	0.30841	0.541198	-0.425667	0.0755405	-0.119058	0.131101	0.0931352	0.0207835	-0.887437	0.239054	-0.83525	-0.889101	-0.0135495	0.319149	-0.361114	0.247629	-0.302025	-0.149959
UCON22	Unknown	Unknown	-0.186865	0.213798	-0.192125	0.79034	0.217179	-0.21511	0.146744	0.973225	-0.0205096	1.50192	0.181578	0.610793	-1.24219	-0.760561	0.280697	-0.764732	-0.833931	-0.152319	-0.3526	-0.0224319
UCON23	hAT-Tip100	DNA	-0.666296	0.326759	-0.889872	-0.860976	-0.067233	0.224644	0.0119396	-0.394145	-0.196607	0.0144641	-0.447927	-0.602426	-0.85595	-0.71463	-0.286079	-1.76416	-0.595143	0.755416	0.571784	0.0620397
UCON24	Unknown	Unknown	-0.519604	-1.00518	-0.230019	0.504524	-0.254734	-0.288687	-0.353472	-0.824276	-0.542783	0.326396	-1.39218	-0.175542	-1.76997	-0.930212	-0.139275	-1.23452	-0.528799	-0.00201166	0.397393	-0.890723
UCON25	Unknown	Unknown	0.248063	1.1546	-0.569425	-0.576286	0.127438	0.118149	-0.0778825	0.10269	1.1828	3.09074	-0.660454	-0.43075	1.01788	-1.93516	-1.65731	0.207461	0.666022	0.628677	-0.267989	-0.568203
UCON26	Unknown	Unknown	0.0533474	0.86284	-0.164402	0.282112	-0.300697	0.125368	-0.347991	-0.336821	-0.547894	-0.332776	-0.385822	0.257684	-0.837556	-0.124414	0.0981279	0.390656	0.848656	0.165073	-0.052741	-0.0896145
UCON27	Unknown	Unknown	-0.608409	-0.372404	-0.262396	-0.0156672	-0.146185	-0.0124513	0.105436	-0.272948	-0.561455	-0.050964	-0.863485	-0.477328	-0.988389	-0.615589	0.117824	-0.361083	-0.047037	-0.0130271	0.132756	0.196103
UCON28a	Unknown	Unknown	-0.267906	-0.015654	-0.260426	-0.131769	-0.422109	0.222516	-0.0677052	-0.396188	0.3423	0.957835	-0.355393	0.170313	-1.34827	-0.487927	-0.184577	-0.0720823	-0.180399	0.0428496	-0.390658	-0.121014
UCON28b	Unknown	Unknown	0.13103	0.231049	-0.263741	0.361165	-0.13711	0.158795	-0.437283	0.13309	-0.329128	-0.135214	-0.452412	0.100517	-1.44168	-0.0604685	0.236288	0.11191	0.296996	0.65397	-0.248425	-0.405223
UCON28c	Unknown	Unknown	-0.489613	0.0271691	-0.0965462	0.564774	-0.126637	-0.0341426	-0.432291	0.127421	0.0586028	0.558335	-0.360181	0.0734947	-1.3382	-0.51745	0.161907	-0.0915943	-0.618921	-0.712237	0.20801	0.22401
UCON29	PiggyBac	DNA	0.111933	0.262764	-0.209634	0.0493219	0.0249356	0.276673	-0.256724	0.0850841	0.00521777	0.917252	-0.644835	-0.296283	-0.546763	-0.504082	-0.0884683	0.0189166	0.514845	0.177772	0.0392436	-0.126639
UCON31	Unknown	Unknown	0.231228	0.869841	-0.458841	0.089187	0.156661	0.39349	-0.0627997	-0.307688	0.196101	0.74055	-0.228454	0.317033	-1.21059	-0.936259	-0.811504	0.207373	0.442612	0.600866	-0.266316	-0.346685
UCON33	TcMar-Tigger	DNA	-1.00968	-0.000673833	-0.807992	-0.400552	-0.769325	-0.217968	-0.27016	-0.707752	-1.30871	0.518295	-0.793139	-0.165082	-1.04512	-0.328754	0.537613	-0.195646	-0.159289	-0.551284	0.179259	-0.0696545
UCON34	Unknown	Unknown	-0.791699	-0.226011	-0.537222	0.116308	-0.26546	0.0920354	-0.130013	-0.0684738	-0.388634	0.0758917	-0.574439	0.0419249	-1.28939	-0.753124	-0.270779	-0.396901	0.233348	0.426354	-0.0318127	0.0480995
UCON35	Unknown	Unknown	-0.328993	0.958452	-0.458515	0.130652	-0.0963287	0.192959	-0.137289	-0.117902	0.834508	0.958022	-0.702493	0.16244	-0.129943	-0.605451	0.177933	0.560917	0.439993	0.122987	0.0596474	0.0892578
UCON37	Unknown	Unknown	-0.503498	1.15707	-0.40174	0.517883	-0.19486	0.353821	-0.115624	0.173058	-1.0418	-0.153841	-0.953912	-0.70917	-0.747285	-0.498607	0.540141	-0.628019	0.423395	-0.29488	-0.23673	0.120811
UCON38	Unknown	Unknown	-0.460096	0.169716	-1.14695	0.509759	-0.611621	-0.234948	-0.0711189	0.651497	-0.0353473	1.23517	-0.826243	-0.215304	-0.960774	-0.166758	0.773204	0.0595996	0.75477	-0.271671	0.284599	0.284919
UCON39	TcMar-Tigger	DNA	-0.390936	1.26991	-1.00066	-0.0788367	-0.462538	-0.219421	-0.120094	-0.21589	-0.310226	0.0680907	-0.879942	0.0195254	-1.0509	-1.00334	0.507438	-0.280405	-0.2509	0.141771	-0.298626	0.0164245
UCON4	Unknown	Unknown	0.153694	1.02019	-0.651738	0.0420579	0.239948	0.386415	-0.0454369	-0.415895	0.0185277	0.257891	-0.709896	-0.066692	0.571196	-0.936441	-0.150024	-0.257205	0.48159	-1.06563	0.106143	0.397257
UCON40	Unknown	Unknown	-0.355967	-0.227486	-0.543292	-0.000775786	-0.22876	-0.0155382	0.101449	-0.448058	-0.338711	0.0964894	-0.189876	0.132382	-0.641787	-0.102419	0.262068	0.0634442	0.190129	0.18271	-0.423626	-0.274626
UCON41	Unknown	Unknown	-0.691735	-0.484156	-0.563052	-0.455523	-0.444311	-0.0575521	-0.549737	-0.66314	-0.327707	-0.0353293	-0.631205	0.116343	-0.883535	-0.086164	0.706215	-0.848194	-1.19679	0.382466	0.0677318	0.378065
UCON43	Unknown	Unknown	-0.0311249	1.01499	-0.0560999	0.720295	-0.236134	-0.209958	-0.695607	-0.267333	-0.0638412	0.550741	0.20352	0.274732	-0.71363	-0.014279	1.30563	-0.529914	0.394548	0.0891876	-0.358607	0.203675
UCON44	Unknown	Unknown	-0.732541	0.125871	-0.406173	-0.55627	-0.227047	0.564993	0.00368829	-0.761859	-0.602923	0.108625	-0.307086	0.037683	-1.39817	-0.357378	0.311101	0.49032	0.790854	0.103106	0.418301	0.0329664
UCON46	Unknown	Unknown	-0.437702	-0.853913	-0.487496	0.240115	-0.131544	0.236497	0.0859778	-0.00892469	-0.541217	0.223514	-0.456486	-0.482253	-1.35158	-0.702398	0.124025	-0.00370736	-0.516737	-0.310092	0.232867	0.35752
UCON47	Unknown	Unknown	-0.568327	-0.403061	-0.199318	0.521542	-0.211394	0.00888929	0.1296	0.138253	0.00625862	0.0449814	-0.604432	-0.336985	-0.474636	-0.386852	0.774893	-0.0402461	0.21648	0.248475	-0.437742	-0.541775
UCON48	Unknown	Unknown	-0.242525	-0.376544	-0.369176	-0.295077	-0.167038	-0.235339	-0.222749	-0.368741	-0.17859	0.0725338	-0.511936	0.00276238	-1.64265	-0.231884	-0.339077	0.303704	0.0635686	0.00147561	-0.291951	-0.0594235
UCON49	L2	LINE	-0.112169	0.148899	0.182472	0.434539	0.0849199	0.125646	-0.337064	0.0662955	0.13532	1.06773	-0.738614	0.171005	-0.091844	-0.725883	-0.152508	0.0229961	-0.250654	-0.188683	-0.0957975	-0.403264
UCON5	Unknown	Unknown	-0.539418	-0.261629	-0.0152062	0.063123	-0.264759	-0.0133131	0.0155736	-0.122721	-0.429452	0.123004	-0.453719	-0.00295707	-1.33469	-0.469968	-0.308847	0.225089	0.113707	0.852625	0.12445	-0.311745
UCON50	Unknown	Unknown	1.04017	0.999495	-0.813609	-0.349979	-0.502134	-0.945414	-0.335345	-1.23751	0.244858	1.20253	0.290833	1.39444	0.711046	-0.528968	0.645536	-1.71007	1.41092	0.487272	-0.202797	0.221419
UCON51	LTR	LTR	-0.414247	-0.575071	-0.365108	-0.247346	0.0180749	0.535128	-0.00850075	0.197555	-0.326837	-0.614954	-0.528031	-0.188728	-0.156517	-0.0838462	-0.478201	1.34476	0.972543	0.418515	-0.49976	-0.206661
UCON53	Unknown	Unknown	-1.02903	0.237502	-0.545995	-0.109303	-0.371116	0.304949	0.248198	-0.675095	-1.10611	0.0887187	-1.0021	0.130462	-1.03245	-1.39577	-0.329973	-0.175927	-0.715546	-0.235263	-0.148953	0.0599477
UCON54	Unknown	Unknown	-0.63573	-1.02628	-0.129072	0.352863	-0.416959	-0.256603	-0.0179456	-0.336076	-0.39601	0.0726372	-0.645256	0.0164686	-0.46568	-0.278611	0.366068	-0.402628	-0.663117	-0.32765	-0.311337	-0.310903
UCON55	TcMar-Tigger	DNA	-0.0795411	0.146409	-0.453941	-0.175776	-0.298562	0.0548973	-0.195861	-0.524201	0.16303	0.471603	-0.524971	-0.075008	-0.0920001	-0.29866	0.0325517	-0.0708238	0.449688	0.0570292	-0.070694	-0.209533
UCON56	Unknown	Unknown	0.55954	NA	0.198254	-0.17802	0.390646	-0.680082	-0.241111	-0.336573	0.0904716	1.44562	0.152003	0.237205	-1.33328	-6.55497	0.267369	1.17178	-1.04731	0.354702	-1.80316	-0.260169
UCON57	Unknown	Unknown	-0.0785287	0.817136	0.233526	1.09624	-0.855972	-0.5208	-0.496348	-0.228184	0.203092	0.226597	-0.124104	0.392294	-0.91388	-0.585471	0.880467	0.930756	-1.926	1.1986	-0.635462	-0.885555
UCON58	Unknown	Unknown	-2.79701	-0.869015	-1.59538	-0.500643	-0.48951	0.201409	-0.410426	-1.161	-1.5269	0.441192	0.141665	0.549479	2.7866	2.17897	3.15843	1.53623	0.68503	2.2365	1.1186	0.382976
UCON59	Unknown	Unknown	-0.674612	0.599762	0.168449	0.607404	0.252363	0.774159	0.181724	-0.621885	0.21838	-0.647065	-0.756576	-0.112374	-0.155689	-0.684273	-0.570471	-0.0744555	-0.186129	-0.404134	0.106426	-0.49826
UCON6	Unknown	Unknown	-0.488492	-0.179385	-0.619759	-0.0689364	0.125261	0.400201	0.148056	0.0373053	0.0785376	0.398872	-0.683731	-0.381741	-1.08553	-1.0616	-0.100884	0.475511	-0.175656	-0.419988	-0.20723	-0.269532
UCON60	Unknown	Unknown	-1.22654	-0.610798	-0.634405	-0.615805	-0.28519	-0.383484	0.0253056	0.713528	-0.154633	0.0855818	-0.32438	0.482341	-0.131054	-1.40741	1.10054	-0.617792	0.722619	0.628542	0.134781	0.394643
UCON61	Unknown	Unknown	-1.22877	-1.3249	-1.51168	-0.445824	-0.706889	0.523847	0.316833	0.500808	-0.25966	0.396071	-0.417809	0.14397	-0.298048	-1.41504	0.0655883	0.3901	0.312107	1.72277	0.551077	0.552096
UCON62	DNA	DNA	-0.484276	-0.188642	-0.989609	-0.0156769	-0.556253	0.317553	-0.589916	-0.457713	-0.4697	-0.205595	0.118964	0.532555	-2.61856	-0.619123	0.441099	0.100022	0.894555	0.204845	0.225994	-0.0141615
UCON63	Unknown	Unknown	-0.257798	0.652174	-1.0898	0.221881	-0.576575	-0.264036	0.0884299	-0.342672	-1.45627	0.0911417	-0.394506	0.520484	0.0985499	0.0662732	-1.38405	-0.814416	-0.131922	-0.0374645	0.863576	-0.151526
UCON64	Unknown	Unknown	-1.1124	0.617652	-1.37568	-0.287687	-0.00910221	-0.424561	0.389229	-1.86492	0.0732636	0.169245	-0.360447	0.211611	-0.255456	-0.941796	-0.0609979	-0.585427	0.339099	-0.0337033	-0.586436	-0.876802
UCON65	Unknown	Unknown	0.370052	0.447107	0.473414	0.076658	-0.108017	-0.332959	-0.0119779	-0.353539	0.909323	2.33308	0.0294722	0.365365	-2.22836	-0.615367	-0.296341	-1.0127	0.423925	0.494175	-0.461413	0.0980505
UCON66	Unknown	Unknown	-0.0302899	-0.193159	0.53518	0.306601	0.0696954	-0.0746923	-0.0529261	1.11709	-0.106679	1.37877	-0.72138	0.0082874	-1.60891	-0.492457	-0.0404237	-0.0617943	0.473237	0.523164	-0.236168	0.110477
UCON67	Unknown	Unknown	0.294947	-0.504043	0.254878	0.23043	-0.227328	-0.136582	0.148959	0.391902	0.00464138	0.185323	-1.1628	0.0386805	1.22751	-0.181304	1.50884	0.973634	-0.00572661	0.329664	-0.654728	-0.933602
UCON68	Unknown	Unknown	-0.517117	-2.96205	-0.0931094	-0.689502	-0.60444	0.89891	-1.45573	-2.28428	1.54883	1.60772	NA	0.169792	0.0587004	-2.3435	-1.60756	0.533626	2.11334	1.76873	0.851137	-1.16771
UCON69	hAT	DNA	-1.08815	-1.79803	-0.708221	0.459045	0.266061	0.689382	-0.0606113	0.0779273	-1.09651	-0.38801	-0.988761	-0.439485	-1.86593	-1.33948	-0.552189	-0.86278	-0.0170368	-0.453928	0.330956	-0.209702
UCON7	DNA	DNA	-0.875067	-1.48677	-0.519727	-0.349397	-0.379131	-0.0819793	0.0632976	-0.502218	-0.584246	0.179862	-0.866815	0.136617	-1.46239	-1.52451	0.331605	-0.374538	-0.575337	-0.0258741	-0.225864	-0.348151
UCON70	Unknown	Unknown	-0.256548	-0.102875	-0.734805	-0.429224	-0.254942	0.393862	-0.33608	-0.841998	-0.0787046	0.263569	-0.478994	0.368522	-0.277836	-0.200523	0.695044	0.092828	0.549827	0.738982	0.134472	-0.120363
UCON71	Unknown	Unknown	-0.853179	-0.272807	-0.620832	-0.0826954	-0.226089	-0.964454	-1.12497	-1.07282	-0.114522	1.18039	-1.23874	-0.93134	0.119693	-1.72416	-0.556863	-1.01113	-1.46925	-0.722928	0.0054827	0.0487701
UCON71_Crp	Unknown	Unknown	-0.332881	0.320467	-0.628428	-0.217075	-0.0097595	-0.00598535	-0.0948894	0.23184	-0.166734	0.514011	-0.51547	0.0524823	-0.429127	-0.614497	0.127349	0.15807	0.212044	-0.353381	-0.00928854	0.190077
UCON72	Unknown	Unknown	0.414087	0.634509	-1.01138	-0.297811	-0.0269827	0.534403	0.256049	0.28357	0.37732	0.19237	0.200653	0.698589	-0.772794	-0.473329	-0.191178	0.24139	0.307697	0.535362	0.206281	-0.249624
UCON73	Unknown	Unknown	-0.633006	0.898563	-1.61553	-0.676936	0.554782	0.299814	-0.476758	-0.221575	0.810493	1.36365	-0.996041	-0.265086	-0.408893	-1.70066	-0.524687	-1.11023	-0.524789	-0.229398	-0.0298675	-0.0491679
UCON74	DNA	DNA	-0.803843	-0.726961	-0.789717	0.0214915	-0.400755	0.0192949	-0.0689451	-0.0864065	-1.05935	-0.498537	-0.917088	-0.387216	-1.03623	-0.268844	-0.0385606	0.0147676	-0.144868	-0.0322361	0.116046	0.21989
UCON75	Unknown	Unknown	-1.45705	-1.21283	-0.535558	0.15605	-0.685626	-0.303478	-0.178993	-0.7698	-0.18663	0.203486	-1.38175	0.130961	-0.398769	0.356516	1.22537	-0.994647	-0.194226	0.740563	0.315589	-0.171404
UCON76	Unknown	Unknown	-0.0190995	0.150181	0.28021	-0.131251	-0.0378306	0.72267	-0.0433998	-0.0367553	0.461098	0.7989	-0.821708	0.267921	0.0893991	0.0193808	0.254558	-0.665551	0.187577	-0.305034	0.407537	-0.0513338
UCON77	Unknown	Unknown	-0.142687	0.506555	-0.342994	0.229753	-1.03266	-0.0156474	-0.835025	-0.409901	-0.623605	-0.0335745	-0.583532	-0.0355261	-0.584416	0.0416892	0.771546	-0.743014	0.66334	-0.325354	0.325555	0.260588
UCON78	DNA	DNA	-0.0637998	1.26339	-0.439893	0.109647	-0.0674293	0.161369	-0.376005	-0.366841	0.453948	1.40137	-0.775424	0.0626608	-0.760379	-0.525895	-0.512239	-0.140842	0.327196	-0.0611423	0.176094	-0.0633184
UCON79	DNA	DNA	-0.484245	0.234315	-0.486796	-0.159148	-0.260097	-0.281907	-0.133432	-0.0818352	-1.25351	-0.606867	-0.684695	-0.332339	-1.34055	-1.1938	0.76707	-0.00147061	0.295268	0.433025	-0.215702	0.285093
UCON8	DNA	DNA	0.23655	1.34029	-0.0428439	0.323485	-0.428242	0.219796	-0.568575	-0.28542	-0.0413867	0.216942	-0.428069	-0.0505285	-0.647254	-0.49925	-0.397761	-0.0693982	0.659558	-0.082279	-0.203318	-0.38451
UCON80	hAT	DNA	-0.293909	1.01033	-0.780455	0.611589	0.373805	-0.27	-0.735054	-0.322259	0.8379	0.36174	-0.328054	0.136296	0.280916	-0.934912	-0.182775	0.311022	1.45786	0.509215	-0.521121	-0.26106
UCON80_AMi	Unknown	Unknown	0.109481	0.286297	-0.221147	0.157521	-0.545888	-0.0054443	-0.264198	-0.704004	-0.347592	0.454122	-0.304309	-0.167686	-0.49847	-0.782144	0.0760049	-0.020017	0.480316	-0.0924058	-0.0396785	-0.128062
UCON81	hAT-Charlie	DNA	-0.326463	0.758581	-0.627829	-0.00220933	-0.620203	-0.0990531	-0.937916	-0.371883	-0.0514566	-0.0452615	-0.627694	-0.111932	-0.782168	0.141465	-0.540519	-1.069	-0.404006	-0.475591	-0.536912	-1.40831
UCON82	Unknown	Unknown	0.0106767	0.20933	-0.590824	0.450569	-1.0249	0.0848391	-0.260894	-0.77756	-0.569997	-0.951849	-0.785085	-0.437645	-1.32527	-0.471356	-0.422667	0.115799	-0.216505	0.325788	-0.814843	-0.103135
UCON83	SINE	SINE	-1.08045	-0.758607	-0.478798	0.167093	-0.195321	0.347506	0.0563004	-0.575654	-0.592888	1.73526	0.179068	-0.739141	-1.11241	-0.986735	0.0930578	0.602316	0.471376	0.270564	-0.382286	-0.499377
UCON84	Unknown	Unknown	-0.790268	-0.930982	-0.824404	-0.056503	-0.426546	-0.0735557	-0.317582	-0.281604	-0.465457	0.368283	-0.598648	0.21363	-1.1424	-0.691076	0.0396353	-0.248721	-0.274345	0.12196	-0.248099	-0.135174
UCON85	Unknown	Unknown	0.201928	0.948813	0.0985282	0.498061	-0.191338	0.590285	0.0123153	-0.285057	0.64368	1.2525	-0.623591	-0.993495	-0.561176	0.161071	0.219918	0.518031	0.819428	0.156995	-1.21016	-0.43798
UCON86	L2	LINE	-0.518824	-0.0824259	-0.0613767	0.405503	-0.0806581	0.208076	-0.492614	-0.103098	-0.27922	0.660036	-0.966321	-0.274175	-1.05679	-0.0441521	0.391621	0.125987	0.467742	0.654279	-0.284233	-0.252486
UCON87	Unknown	Unknown	0.0602106	-0.166572	1.11612	0.154723	-0.643494	0.496568	-0.00658191	-1.28054	1.02781	1.31271	0.176878	1.59648	1.29071	NA	2.19941	-0.321928	NA	-1.46454	-0.930922	-1.29278
UCON88	Unknown	Unknown	0.13303	-0.0184843	-0.262292	1.58036	0.472115	0.227975	-1.00514	1.95418	2.05353	2.99857	-0.361474	0.471495	0.61717	-1.18855	0.621878	1.35133	-0.46828	-0.0813396	0.383632	-0.138883
UCON89	hAT	DNA	0.42516	1.24455	-0.236793	0.916104	0.505534	-0.285037	-0.579578	0.541886	2.09861	2.03581	-0.747834	0.0592758	1.22651	-0.953991	-0.0343386	0.521219	1.52882	0.262981	0.068958	-0.0325354
UCON9	Unknown	Unknown	-1.23589	-0.517961	-0.758996	0.102644	-0.543416	-0.257028	0.134584	-0.20347	-0.450421	-0.190299	-0.579013	-0.0942364	-1.79238	-0.686236	-0.230048	0.331534	-0.627284	0.0195643	0.360728	0.165634
UCON92	Unknown	Unknown	0.348715	0.833877	-0.19104	0.316405	-0.292382	-0.600034	-0.168091	-0.963073	0.249591	-0.105184	-0.865164	0.0512305	-4.17822	-2.11924	-0.691369	-1.72739	-0.825833	-0.144771	0.250281	-0.060278
UCON93	Unknown	Unknown	-0.0237544	1.79685	0.545879	1.2696	-0.522096	-0.172527	-0.256632	-0.710022	0.49226	0.0678126	-0.963474	0.545773	-1.18272	-1.36451	0.504459	-1.69707	-0.803167	-0.835027	0.690159	0.16445
UCON94	Unknown	Unknown	-0.650277	-1.15131	-0.0203128	0.357575	-0.265566	0.097136	-0.318755	-0.193892	0.131685	0.507538	-1.0818	0.117434	-0.115688	-1.14014	-0.481771	2.15991	0.021287	-0.0209629	-0.134314	-0.137482
UCON96	Unknown	Unknown	-0.385654	0.698961	-0.148702	0.797577	-0.70437	-0.390749	-0.247659	-0.809146	-1.14423	-0.21029	-1.22535	-0.248508	-0.47095	-0.00830771	1.22183	-0.715547	-3.56986	-0.88608	-0.0617122	0.575181
UCON97	DNA	DNA	0.409222	0.558949	-0.60029	-0.16452	0.34219	0.891009	-0.366267	-0.244825	-0.0655839	0.453133	-0.515624	-0.282773	-0.892478	-0.51005	0.126186	0.165444	0.534392	-0.209937	0.667137	0.0509466
UCON99	DNA	DNA	-0.499165	0.800582	-0.425358	-0.469024	-0.0732207	-0.337725	-0.379663	-0.394468	-0.0136634	0.0522179	-0.486563	0.223974	-0.356605	-0.501272	0.820807	0.485294	0.700383	0.620493	-0.147974	-0.136201
X1_LINE	CR1	LINE	-0.653801	-0.539361	-0.466284	0.0409737	-0.544548	0.082537	-0.339424	-0.496972	-0.405221	0.118093	-0.608896	-0.08434	-1.20655	-0.601812	0.324406	0.0018695	0.392789	0.650049	-0.184363	-0.216084
X2_LINE	CR1	LINE	-0.150287	0.345829	-0.838172	-0.233239	-0.112009	0.346109	-0.100127	-0.554077	-0.402907	-0.13796	-0.447019	-0.130258	-0.8421	-0.407956	0.264394	-0.0452993	-0.102061	-0.0659032	-0.416656	-0.419789
X5B_LINE	CR1	LINE	0.785208	0.65976	-0.0927492	0.388853	0.471916	-0.0987834	-0.356728	-0.195191	0.732793	0.725347	-0.534448	-0.136797	1.04768	-0.552776	0.209026	0.237359	0.23018	0.208021	-0.644268	-0.249879
X6A_LINE	CR1	LINE	-0.134491	0.0399288	-0.369504	-0.00632789	-0.209464	0.0184916	-0.164605	-0.18099	-0.171105	0.227987	-0.467148	0.042859	-0.356518	-0.430254	0.122352	-0.0539125	0.0454435	0.00986729	0.0152047	-0.0678054
X6B_LINE	CR1	LINE	-0.232889	-0.0619807	-0.272424	0.0552943	-0.222677	0.0302496	-0.162217	-0.216883	-0.218627	0.625584	-0.521846	-0.0125821	-0.691952	-0.604134	-0.149308	-0.038509	0.243359	0.400296	-0.162518	-0.154382
X7A_LINE	CR1	LINE	-0.0929929	0.457463	-0.541347	0.0739666	-0.0500857	0.109027	-0.128229	-0.0677889	-0.340892	-0.14778	-0.472746	0.0122459	-0.176715	-0.297075	0.201098	-0.113905	0.288763	-0.0570814	0.111181	0.0786101
X7B_LINE	CR1	LINE	-0.529832	-0.00276971	-0.596031	-0.160267	-0.184572	-0.0803858	-0.112051	-0.218261	-0.40517	-0.14387	-0.486937	-0.0816323	-0.41493	-0.513696	0.296381	-0.117328	-0.0359887	0.0323407	0.0282947	0.113781
X7C_LINE	CR1	LINE	0.0790342	0.295198	-0.419843	0.0882698	-0.313172	-0.0358852	-0.131439	-0.141327	-0.251562	0.25041	-0.550365	0.0108668	0.118097	-0.19195	0.156757	-0.203055	0.173531	0.0502659	4.56391e-05	0.0149813
X7D_LINE	CR1	LINE	-0.664228	-0.0714942	-0.734683	-0.27211	-0.892072	-0.110083	-0.209296	-0.69696	-0.426396	0.119244	-0.480934	-0.0343717	-0.468598	-0.566441	0.262125	0.0793499	-0.526681	0.224859	-0.689719	-0.0676676
X8_LINE	CR1	LINE	-0.330079	0.129611	-0.612786	-0.374393	-0.218496	-0.121367	-0.229444	-0.442353	-0.584291	-0.00644872	-0.67145	-0.158392	-0.288369	-0.613593	0.47665	0.223082	-0.0394242	-0.374373	-0.041044	0.107255
X9_LINE	L1	LINE	-0.0372006	0.504594	-0.471999	0.0279175	-0.151295	-0.0269065	-0.443708	-0.127455	-0.0352339	0.275037	-0.486079	-0.0689333	-0.224152	-0.404343	0.203309	0.176093	0.195753	0.07716	-0.044086	0.0632966
Zaphod	hAT-Tip100	DNA	-0.70604	-0.512173	-0.464432	-0.291107	-0.656301	-0.324654	-0.0475718	-0.498061	-0.905954	0.238185	-0.652691	0.125442	-0.992949	-0.50132	0.0580265	-0.221545	-0.441134	-0.123084	-0.182222	-0.2327
Zaphod2	hAT-Tip100	DNA	-0.786083	-0.777468	-0.459589	-0.0951412	-0.45425	-0.345101	-0.019186	-0.254731	-1.1315	0.069612	-0.581584	-0.0282938	-1.10582	-0.467135	0.338019	-0.225704	-0.343145	0.215509	-0.142553	-0.158332
Zaphod3	hAT-Tip100	DNA	-0.458317	-0.159438	-0.43762	0.0846402	-0.408247	-0.178588	-0.0934794	-0.0260305	-0.972926	-0.132732	-0.58999	-0.0377729	-0.620825	-0.398674	0.252664	-0.106579	-0.232563	0.0627373	-0.039944	0.00588622
hAT-16_Crp	hAT-Charlie	DNA	-0.574557	-0.264635	0.266146	0.730844	-0.417256	-0.179852	0.109085	-1.17243	-0.918118	-0.0977624	-0.322208	-0.180695	-1.14985	0.00939403	0.543725	-0.180312	-0.586358	1.03234	0.229649	-0.0660701
hAT-N1_Mam	hAT-Tip100	DNA	-0.597727	-0.311912	-0.443432	-0.0387817	-0.481595	-0.125246	-0.18002	-0.372489	-0.495912	-0.229138	-0.429097	-0.117483	-1.23516	-0.490127	0.0238073	-0.229231	-0.434771	-0.193926	-0.182532	-0.193277

## Sheet: Suppl. Table 2
Supplementary Table 2. Enrichment levels of MER57E3 TE subfamily copies in neural progenitor cells (NPCs). Log2 fold-change enrichment values for 252 MER57E3 TE copies. Peaks called using MACS2 "callpeak". Four histone modifications, H3K4me3, H3K27ac, H3K9me3 and H3K27me3.
MER57E3 copy locus	NPC_H3K4me3 (log2FC)	NPC_H3K4me3 (peak)	NPC_H3K27ac (log2FC)	NPC_H3K27ac (peak)	NPC_H3K9me3 (log2FC)	NPC_H3K9me3 (peak)	NPC_H3K27me3 (log2FC)	NPC_H3K27me3 (peak)
chr1:227564046-227564512	4.08632	chr1 227564046 227564512 MER57E3 chr1 227564145 227564846 NPC_H3K4me3_chr1_peak_60941 42 . 1.38982 5.44518 4.24622 281	2.03184	chr1 227564046 227564512 MER57E3 chr1 227563536 227564592 NPC_H3K27ac_chr1_peak_96632 16 . 1.21336 2.47688 1.69679512	-1.77228	-	-1.25934	-
chr1:247006769-247007223	2.69903	chr1 247006769 247007223 MER57E3 chr1 247006668 247006893 NPC_H3K4me3_chr1_peak_66574 20 . 1.24582 2.96181 2.07028 87|chr1 247006769 247007223 MER57E3 chr1 247006971 247007196 NPC_H3K4me3_chr1_peak_66575 27 . 1.29085 3.68542 2.70398 132	-1.2911	-	-0.592103	-	-1.4929	-
chr1:247007524-247007539	5.1169	chr1 247007524 247007539 MER57E3 chr1 247007473 247008113 NPC_H3K4me3_chr1_peak_66576 38 . 1.36756 5.0318 3.88516 382	1.56753	chr1 247007524 247007539 MER57E3 chr1 247007404 247008115 NPC_H3K27ac_chr1_peak_105418 47 . 1.41637 5.94978 4.782 417	-0.790404	-	-0.896155	-
chr1:247077924-247078265	3.97051	chr1 247077924 247078265 MER57E3 chr1 247077983 247078348 NPC_H3K4me3_chr1_peak_66619 37 . 1.35779 4.85332 3.72763 197	0.380751	chr1 247077924 247078265 MER57E3 chr1 247078058 247078898 NPC_H3K27ac_chr1_peak_105443 46 . 1.40625 5.75616 4.60844433	-3.33936	-	-1.01949	-
chr1:247103331-247103351	2.95513	-	NA	-	NA	-	-0.290189	-
chr1:247103659-247103854	4.23833	chr1 247103659 247103854 MER57E3 chr1 247103634 247103839 NPC_H3K4me3_chr1_peak_66626 15 . 1.20136 2.30612 1.50238 174	0.589208	chr1 247103659 247103854 MER57E3 chr1 247103549 247104527 NPC_H3K27ac_chr1_peak_105457 22 . 1.25194 3.05685 2.20532542	-0.960512	-	-1.4436	-
chr1:247126931-247127132	3.68536	chr1 247126931 247127132 MER57E3 chr1 247126246 247126996 NPC_H3K4me3_chr1_peak_66636 55 . 1.46498 6.90195 5.51521 374|chr1 247126931 247127132 MER57E3 chr1 247127105 247127310 NPC_H3K4me3_chr1_peak_66637 18 . 1.23278 2.76315 1.89761 102	0.855869	-	0.255971	-	-0.180058	-
chr1:247127245-247127448	1.49391	chr1 247127245 247127448 MER57E3 chr1 247127105 247127310 NPC_H3K4me3_chr1_peak_66637 18 . 1.23278 2.76315 1.89761 102	-1.40854	-	-0.827158	-	-0.622808	-
chr1:247127909-247127998	2.40318	-	1.00696	chr1 247127909 247127998 MER57E3 chr1 247127536 247128147 NPC_H3K27ac_chr1_peak_105470 16 . 1.21336 2.47688 1.69679485	-1.02414	-	-2.2822	-
chr1:247170444-247170533	2.48625	-	0.813704	chr1 247170444 247170533 MER57E3 chr1 247170496 247171104 NPC_H3K27ac_chr1_peak_105491 16 . 1.21336 2.47688 1.69679333	-1.23993	-	-2.82215	-
chr1:247170993-247171196	1.48054	chr1 247170993 247171196 MER57E3 chr1 247171131 247171336 NPC_H3K4me3_chr1_peak_66663 18 . 1.23278 2.76315 1.89761 91	-1.40991	chr1 247170993 247171196 MER57E3 chr1 247170496 247171104 NPC_H3K27ac_chr1_peak_105491 16 . 1.21336 2.47688 1.69679333	-0.792221	-	-0.780725	-
chr1:247171309-247171510	3.61246	chr1 247171309 247171510 MER57E3 chr1 247171131 247171336 NPC_H3K4me3_chr1_peak_66663 18 . 1.23278 2.76315 1.89761 91|chr1 247171309 247171510 MER57E3 chr1 247171445 247172198 NPC_H3K4me3_chr1_peak_66664 73 . 1.56727 9.00233 7.32119 429	0.75687	chr1 247171309 247171510 MER57E3 chr1 247171444 247172111 NPC_H3K27ac_chr1_peak_105492 85 . 1.62316 10.1916 8.50048532	0.556967	chr1 247171309 247171510 MER57E3 chr1 247171466 247171708 NPC_H3K9me3_chr1_peak_54263 52 . 1.46139 6.8306 5.26063138	-0.484111	-
chr1:247209903-247210377	3.61322	chr1 247209903 247210377 MER57E3 chr1 247209493 247210210 NPC_H3K4me3_chr1_peak_66680 91 . 1.66681 11.1357 9.11953 458|chr1 247209903 247210377 MER57E3 chr1 247210258 247210462 NPC_H3K4me3_chr1_peak_66681 18 . 1.22637 2.66727 1.81453 113	0.307306	-	-1.18331	-	-2.47646	-
chr10:42366325-42366663	2.06839	chr10 42366325 42366663 MER57E3 chr10 42365989 42366595 NPC_H3K4me3_chr10_peak_18351 93 . 1.67322 11.2753 9.32678 301	-0.401877	-	1.96811	chr10 42366325 42366663 MER57E3 chr10 42366223 4236656NPC_H3K9me3_chr10_peak_11039 18 . 1.23539 2.71295 1.82329 6	0.953626	-
chr10:42366957-42367072	2.24108	chr10 42366957 42367072 MER57E3 chr10 42366827 42367262 NPC_H3K4me3_chr10_peak_18352 32 . 1.32183 4.21342 3.2254 83	2.72898	chr10 42366957 42367072 MER57E3 chr10 42366812 4236726NPC_H3K27ac_chr10_peak_20471 42 . 1.38136 5.28705 4.26201 97	2.86261	chr10 42366957 42367072 MER57E3 chr10 42366907 4236716NPC_H3K9me3_chr10_peak_11040 43 . 1.40352 5.70414 4.3549 43	1.60073	-
chr10:42367416-42367470	-0.0475793	-	-0.016222	-	2.85959	chr10 42367416 42367470 MER57E3 chr10 42367370 4236759NPC_H3K9me3_chr10_peak_11041 54 . 1.47235 7.04923 5.47351 87	1.12039	-
chr11:3378318-3378739	3.8683	chr11 3378318 3378739 MER57E3 chr11 3378358 3378581 NPC_H3K4me3_chr11_peak_938 15 . 1.204722.35347 1.58688 133	0.326547	chr11 3378318 3378739 MER57E3 chr11 3378087 3378368 NPC_H3K27ac_chr11_peak_1819 20 . 1.23522 2.79983 2.02913 220|chr11 3378318 3378739 MER57E3 chr11 3378553 3379256 NPC_H3K27ac_chr11_peak_1820 33 . 1.32758 4.31375 3.37824 390	-1.52772	-	-1.56893	-
chr12:38099995-38100191	4.07739	-	0.88225	-	2.1444	-	-2.24623	-
chr16:31701034-31701520	3.30043	chr16 31701034 31701520 MER57E3 chr16 31700986 31701213 NPC_H3K4me3_chr16_peak_8344 29 . 1.3078 3.97134 2.91673 133|chr16 31701034 31701520 MER57E3 chr16 31701420 31701654 NPC_H3K4me3_chr16_peak_8345 44 . 1.40504 5.73299 4.46565 42	-1.40027	-	-0.871777	-	-0.943028	-
chr16:31713771-31713904	4.84049	chr16 31713771 31713904 MER57E3 chr16 31713698 31713926 NPC_H3K4me3_chr16_peak_8351 45 . 1.41011 5.82979 4.54964 91	2.20424	chr16 31713771 31713904 MER57E3 chr16 31713358 3171425NPC_H3K27ac_chr16_peak_16243 16 . 1.21639 2.52075 1.68953 341	-0.583827	-	0.130071	-
chr16:31874323-31874780	3.68387	chr16 31874323 31874780 MER57E3 chr16 31874567 31874804 NPC_H3K4me3_chr16_peak_8422 54 . 1.46294 6.8613 5.45187 129	0.443401	chr16 31874323 31874780 MER57E3 chr16 31873870 3187439NPC_H3K27ac_chr16_peak_16275 13 . 1.18616 2.09688 1.32366 308	-1.14242	-	-1.59408	-
chr16:31877032-31877175	-0.141269	-	0.76558	-	NA	-	-0.564151	-
chr16:35589884-35590304	0.176839	chr16 35589884 35590304 MER57E3 chr16 35589873 35590153 NPC_H3K4me3_chr16_peak_9744 24 . 1.27924 3.49353 2.49887 14	-6.09602	chr16 35589884 35590304 MER57E3 chr16 35589648 3558992NPC_H3K27ac_chr16_peak_17689 13 . 1.18616 2.09688 1.32366 119	0.194423	-	-0.740601	-
chr16:35590607-35590659	NA	chr16 35590607 35590659 MER57E3 chr16 35590464 35590672 NPC_H3K4me3_chr16_peak_9745 60 . 1.49849 7.57717 6.07779 62	NA	-	NA	-	NA	-
chr18:14131481-14131971	4.64567	chr18 14131481 14131971 MER57E3 chr18 14131289 14131681 NPC_H3K4me3_chr18_peak_4507 18 . 1.22452 2.63984 1.82029 225|chr18 14131481 14131971 MER57E3 chr18 14131941 14132205 NPC_H3K4me3_chr18_peak_4508 24 . 1.26915 3.32974 2.42316 92	0.470891	chr18 14131481 14131971 MER57E3 chr18 14131949 1413324NPC_H3K27ac_chr18_peak_7070 24 . 1.26659 3.28875 2.45301 833	-0.374578	-	-0.570689	-
chr19:11597921-11598250	4.00106	chr19 11597921 11598250 MER57E3 chr19 11597733 11598177 NPC_H3K4me3_chr19_peak_2253 18 . 1.23875 2.85337 1.88656 232	2.05149	chr19 11597921 11598250 MER57E3 chr19 11597723 1159818NPC_H3K27ac_chr19_peak_4361 28 . 1.30376 3.90262 2.87981 242	-1.57748	-	-2.75109	-
chr19:11598367-11598388	2.32277	-	0.428198	-	-1.59293	-	NA	-
chr19:11598442-11598554	2.59273	-	0.49277	-	-1.15771	-	-0.993748	-
chr19:11799050-11799248	5.60365	chr19 11799050 11799248 MER57E3 chr19 11798962 11799735 NPC_H3K4me3_chr19_peak_2310 33 . 1.34298 4.5864 3.34302 437	3.77693	chr19 11799050 11799248 MER57E3 chr19 11798952 1179945NPC_H3K27ac_chr19_peak_4392 47 . 1.42404 6.09775 4.794 142	1.25749	-	1.70505	-
chr19:11815546-11815622	3.05858	chr19 11815546 11815622 MER57E3 chr19 11815288 11815628 NPC_H3K4me3_chr19_peak_2318 14 . 1.20742 2.39168 1.49726 151	-0.707075	-	-0.320682	-	0.867667	-
chr19:11815900-11815949	3.36279	-	1.3552	-	-1.07405	-	0.55366	-
chr19:11816959-11817050	0.277837	-	1.00858	-	0.420676	-	-0.796635	-
chr19:11819720-11819977	-0.740735	-	0.260697	-	-0.544514	-	-1.39724	-
chr19:11849262-11849386	NA	chr19 11849262 11849386 MER57E3 chr19 11848939 11849519 NPC_H3K4me3_chr19_peak_2327 25 . 1.28785 3.63546 2.54427 319	NA	-	NA	-	NA	-
chr19:11850404-11850493	-0.360904	-	0.709952	-	-0.84472	-	-0.0289565	-
chr19:11852830-11852925	0.884522	-	1.367	-	0.530423	-	2.32034	-
chr19:11853228-11853268	-0.554011	-	-1.16095	-	-0.0744661	chr19 11853228 11853268 MER57E3 chr19 11853191 1185351NPC_H3K9me3_chr19_peak_1731 31 . 1.33294 4.40808 3.17048 43	-0.187879	-
chr19:11888333-11888459	4.56992	chr19 11888333 11888459 MER57E3 chr19 11888007 11888454 NPC_H3K4me3_chr19_peak_2339 21 . 1.25546 3.11196 2.10173 262	3.06816	chr19 11888333 11888459 MER57E3 chr19 11887997 1188846NPC_H3K27ac_chr19_peak_4410 31 . 1.32134 4.20492 3.14073 272	-2.50255	-	-3.2631	-
chr19:11890767-11890879	1.35997	-	1.85049	-	-0.256677	-	-1.40863	-
chr19:11893140-11893391	2.83982	chr19 11893140 11893391 MER57E3 chr19 11893032 11893954 NPC_H3K4me3_chr19_peak_2341 15 . 1.21503 2.50102 1.58981 435	0.291877	-	2.03539	-	1.71867	-
chr19:11925630-11925759	3.64078	-	2.43012	-	-2.78887	-	-0.722945	-
chr19:11926721-11926807	-0.346155	-	0.584973	-	0.783355	-	-0.165332	-
chr19:11929483-11929740	-0.452912	-	-2.36944	-	0.184441	-	-1.41804	-
chr19:11965563-11965692	4.12195	-	3.18214	chr19 11965563 11965692 MER57E3 chr19 11965559 1196578NPC_H3K27ac_chr19_peak_4417 20 . 1.24213 2.90506 2.01043 90	-0.449757	-	0.376883	-
chr19:11966700-11966788	0.262219	-	0.818307	chr19 11966700 11966788 MER57E3 chr19 11966581 1196689NPC_H3K27ac_chr19_peak_4419 34 . 1.34143 4.55879 3.45138 31	0.842431	-	2.32419	-
chr19:11969425-11969682	0.866185	-	-0.587251	-	0.117447	-	0.222614	-
chr19:11988138-11988257	4.35767	-	1.51225	-	-0.930346	-	-0.833199	-
chr19:11991692-11991713	NA	-	NA	-	NA	-	NA	-
chr19:11992462-11992535	1.32779	-	1.51869	-	1.96604	-	0.920782	-
chr19:11993958-11994150	1.50438	-	1.65059	-	3.70597	-	1.69728	-
chr19:12033968-12034134	-1.87866	-	0.0538028	-	1.92525	-	1.46078	-
chr19:12034171-12034269	1.61158	-	NA	-	1.51287	-	-0.0502386	-
chr19:12035144-12035188	3.0979	-	-1.00091	-	NA	-	-0.66418	-
chr19:12050366-12050461	-0.0331275	-	NA	-	0.13074	-	0.274995	-
chr19:12052319-12052449	4.25171	-	1.36007	-	-1.30972	-	0.473323	-
chr19:12065242-12065282	NA	chr19 12065242 12065282 MER57E3 chr19 12064977 12065511 NPC_H3K4me3_chr19_peak_2381 25 . 1.28921 3.65806 2.56366 236	NA	-	NA	-	NA	-
chr19:12092773-12092821	3.44601	-	2.60935	chr19 12092773 12092821 MER57E3 chr19 12092512 1209285NPC_H3K27ac_chr19_peak_4445 20 . 1.24614 2.96686 2.06633 166	NA	-	-0.109591	-
chr19:12093073-12093153	4.11034	-	2.43041	chr19 12093073 12093153 MER57E3 chr19 12093044 1209326NPC_H3K27ac_chr19_peak_4446 22 . 1.26247 3.22294 2.28561 70	1.88127	-	0.184219	-
chr19:12093163-12093323	2.33552	-	0.551919	chr19 12093163 12093323 MER57E3 chr19 12093044 1209326NPC_H3K27ac_chr19_peak_4446 22 . 1.26247 3.22294 2.28561 70	-4.36759	-	-2.51135	-
chr19:12118448-12118540	0.623644	-	2.28692	-	1.20207	-	-0.580522	-
chr19:12118548-12118708	-0.0763601	-	-2.95442	-	-0.975545	-	-4.42317	-
chr19:12138956-12139096	2.7724	-	1.15791	-	-0.25808	-	-3.79471	-
chr19:12139466-12139532	4.11135	-	0.328488	-	-0.449722	-	-2.05263	-
chr19:12236272-12236468	0.525091	-	2.43363	-	1.59348	-	1.58113	-
chr19:12236901-12237120	-2.54174	-	-3.86726	-	0.0895886	-	-2.0344	-
chr19:19820132-19820413	3.31076	chr19 19820132 19820413 MER57E3 chr19 19820073 19820375 NPC_H3K4me3_chr19_peak_3981 21 . 1.2605 3.1916 2.17119 138	1.62617	chr19 19820132 19820413 MER57E3 chr19 19820063 1982036NPC_H3K27ac_chr19_peak_6866 30 . 1.31848 4.1552 3.09971 90	1.13015	-	1.26752	-
chr19:19820715-19820910	3.45813	-	2.55954	-	0.865858	-	-0.663833	-
chr19:19821198-19821247	3.6857	-	1.72699	-	-1.77307	-	-3.15505	-
chr19:19859993-19860368	2.88806	chr19 19859993 19860368 MER57E3 chr19 19860278 19860591 NPC_H3K4me3_chr19_peak_3989 19 . 1.24394 2.93283 1.95216 127	-1.62795	-	1.53526	-	1.26451	-
chr19:19860654-19860709	2.6335	chr19 19860654 19860709 MER57E3 chr19 19860631 19860861 NPC_H3K4me3_chr19_peak_3990 18 . 1.2361 2.81314 1.85117 114	1.10228	chr19 19860654 19860709 MER57E3 chr19 19860638 1986146NPC_H3K27ac_chr19_peak_6873 28 . 1.29907 3.82326 2.808 453	-0.408365	-	-0.723971	-
chr19:19867018-19867058	5.95721	-	3.93556	chr19 19867018 19867058 MER57E3 chr19 19866858 1986711NPC_H3K27ac_chr19_peak_6875 16 . 1.21702 2.5299 1.68711 74	0.689471	-	0.393153	-
chr19:19901449-19901492	4.4255	-	3.47261	-	-2.44841	-	NA	-
chr19:19955281-19955331	3.93043	-	2.01438	-	1.51994	-	-0.601978	-
chr19:20038497-20038994	3.81389	chr19 20038497 20038994 MER57E3 chr19 20038105 20038696 NPC_H3K4me3_chr19_peak_4035 17 . 1.22904 2.70703 1.76214 298	1.63463	-	-1.03858	-	-1.44993	-
chr19:20147905-20148353	1.12223	-	0.250868	-	-0.275679	-	0.0314369	-
chr19:20151401-20151451	1.59686	-	0.641342	chr19 20151401 20151451 MER57E3 chr19 20151403 2015167NPC_H3K27ac_chr19_peak_6933 22 . 1.25931 3.17275 2.24489 135	-1.49877	-	-2.77858	-
chr19:20167711-20167760	4.10163	-	3.38087	-	-1.91486	-	-5.47107	-
chr19:20236739-20237169	2.16445	chr19 20236739 20237169 MER57E3 chr19 20236948 20237268 NPC_H3K4me3_chr19_peak_4066 15 . 1.2153 2.50491 1.59334 137	-0.241953	-	1.04219	-	-0.874554	-
chr19:20237883-20237931	4.28142	-	3.64575	-	0.0510047	-	-2.64158	-
chr19:20242863-20243147	2.9596	chr19 20242863 20243147 MER57E3 chr19 20243007 20243236 NPC_H3K4me3_chr19_peak_4069 26 . 1.29698 3.78793 2.67285 91	0.162812	-	1.34024	chr19 20242863 20243147 MER57E3 chr19 20243010 2024323NPC_H3K9me3_chr19_peak_3318 23 . 1.27641 3.4474 2.36758 88	0.0705036	-
chr19:20243445-20243616	2.51241		2.99228	-	3.92013	chr19 20243445 20243616 MER57E3 chr19 20243396 2024360NPC_H3K9me3_chr19_peak_3319 24 . 1.28369 3.56668 2.46642 93	1.70469	-
chr19:20275158-20275573	-0.117767	-	-0.925659	-	-2.13563	-	-0.981507	-
chr19:20275866-20275897	1.34885		0.884845	-	-0.433019	-	-0.0944235	-
chr19:20424082-20424131	4.28586	chr19 20424082 20424131 MER57E3 chr19 20423703 20424102 NPC_H3K4me3_chr19_peak_4089 28 . 1.31122 4.03003 2.87541 233	3.20032	chr19 20424082 20424131 MER57E3 chr19 20423693 2042411NPC_H3K27ac_chr19_peak_6987 37 . 1.35893 4.87413 3.72351 335	-1.73918	-	-0.578816	-
chr19:20473538-20473587	3.30604	-	1.80316	-	-3.25666	-	-3.09593	-
chr19:20564697-20564938	3.00355	-	0.816439	-	-0.025654	-	0.295261	-
chr19:20565234-20565283	3.91578	-	2.80004	-	-4.00947	-	-0.898046	-
chr19:20665814-20665863	3.96218	-	4.5721	chr19 20665814 20665863 MER57E3 chr19 20665714 2066607NPC_H3K27ac_chr19_peak_7025 19 . 1.23417 2.78406 1.90803 194	3.38435	-	1.4298	-
chr19:20666161-20666618	1.44057	-	0.856251	-	-0.0191514	chr19 20666161 20666618 MER57E3 chr19 20666517 2066678NPC_H3K9me3_chr19_peak_3423 22 . 1.27011 3.34527 2.28288 140	-0.857153	-
chr19:20776783-20776832	4.44973	-	2.18028	-	-0.457085	-	-1.1541	-
chr19:20777138-20777596	2.41564	-	0.22423	-	-0.411824	-	-0.719427	-
chr19:20923748-20923799	4.06176	-	3.05329	-	-0.935454	-	-2.83278	-
chr19:20924101-20924543	3.04979	chr19 20924101 20924543 MER57E3 chr19 20924433 20924915 NPC_H3K4me3_chr19_peak_4176 31 . 1.32948 4.3472 3.14377 226	0.516482	-	0.137766	chr19 20924101 20924543 MER57E3 chr19 20924438 2092467NPC_H3K9me3_chr19_peak_3512 27 . 1.30698 3.9574 2.79209 190	-1.22366	-
chr19:21000404-21000893	4.09722	chr19 21000404 21000893 MER57E3 chr19 20999953 21000862 NPC_H3K4me3_chr19_peak_4187 33 . 1.34479 4.61877 3.37092 477	1.2126	chr19 21000404 21000893 MER57E3 chr19 21000112 2100058NPC_H3K27ac_chr19_peak_7064 46 . 1.41567 5.9364 4.6528 172	0.177857	-	0.403243	-
chr19:21021170-21021216	4.09879	-	1.92005	-	-0.968885	-	-1.47762	-
chr19:21021510-21021823	3.53157	-	-0.564396	-	-4.8141	-	-0.971008	-
chr19:21022137-21022275	2.12097	-	0.154072	-	0.123847	-	-2.05638	-
chr19:21082694-21083042	4.28965	chr19 21082694 21083042 MER57E3 chr19 21082454 21082857 NPC_H3K4me3_chr19_peak_4196 27 . 1.30344 3.89719 2.76387 174	1.69446	chr19 21082694 21083042 MER57E3 chr19 21082444 2108286NPC_H3K27ac_chr19_peak_7081 39 . 1.37183 5.11046 3.93111 184	-0.590087	chr19 21082694 21083042 MER57E3 chr19 21082457 2108269NPC_H3K9me3_chr19_peak_3555 24 . 1.28506 3.58935 2.48583 75	-1.47276	-
chr19:21083335-21083468	3.00872	-	2.32422	-	1.55546	-	0.11966	-
chr19:21128498-21128747	4.30507	-	1.33735	-	0.836965	chr19 21128498 21128747 MER57E3 chr19 21128548 2112877NPC_H3K9me3_chr19_peak_3565 20 . 1.25448 3.09663 2.07583 144	1.03027	-
chr19:21129271-21129347	4.03355	-	1.99805	chr19 21129271 21129347 MER57E3 chr19 21129155 2112936NPC_H3K27ac_chr19_peak_7105 31 . 1.31878 4.16042 3.10403 117	NA	-	0.800101	-
chr19:21135257-21135420	0.712379	-	NA	chr19 21135257 21135420 MER57E3 chr19 21134865 2113526NPC_H3K27ac_chr19_peak_7107 38 . 1.3681 5.04173 3.87046 171	-0.184844	-	-0.52227	-
chr19:21142542-21143027	4.79495	chr19 21142542 21143027 MER57E3 chr19 21142499 21142712 NPC_H3K4me3_chr19_peak_4204 14 . 1.20082 2.29845 1.41938 131	1.99896	chr19 21142542 21143027 MER57E3 chr19 21142284 2114290NPC_H3K27ac_chr19_peak_7108 23 . 1.26385 3.24493 2.30577 227	0.466026	-	-0.640617	-
chr19:21268552-21268850	1.16655	-	-1.43794	-	0.305357	-	-0.447199	-
chr19:21269158-21269416	4.7558	chr19 21269158 21269416 MER57E3 chr19 21269306 21269612 NPC_H3K4me3_chr19_peak_4234 26 . 1.29575 3.76735 2.65437 179	1.289	-	1.83562	-	1.33819	-
chr19:21328501-21328624	3.63835	chr19 21328501 21328624 MER57E3 chr19 21328509 21328756 NPC_H3K4me3_chr19_peak_4246 25 . 1.29073 3.68329 2.58559 124	2.12987	chr19 21328501 21328624 MER57E3 chr19 21328499 2132876NPC_H3K27ac_chr19_peak_7153 37 . 1.35845 4.86542 3.71907 134	-0.940691	-	-0.572184	-
chr19:21328633-21328856	3.59973	chr19 21328633 21328856 MER57E3 chr19 21328509 21328756 NPC_H3K4me3_chr19_peak_4246 25 . 1.29073 3.68329 2.58559 124|chr19 21328633 21328856 MER57E3 chr19 21328828 21329065 NPC_H3K4me3_chr19_peak_4247 24 . 1.28363 3.56576 2.4834 111	1.94946	chr19 21328633 21328856 MER57E3 chr19 21328499 2132876NPC_H3K27ac_chr19_peak_7153 37 . 1.35845 4.86542 3.71907 134|chr19 21328633 21328856 MER57E3 chr19 21328818 2132907NPC_H3K27ac_chr19_peak_7154 35 . 1.35099 4.73029 3.59803 121	-0.816789	-	-1.22211	-
chr19:21359500-21359596	4.44529	chr19 21359500 21359596 MER57E3 chr19 21359407 21359612 NPC_H3K4me3_chr19_peak_4251 17 . 1.23138 2.7421 1.79346 129	2.60107	chr19 21359500 21359596 MER57E3 chr19 21359397 2135962NPC_H3K27ac_chr19_peak_7157 27 . 1.29602 3.77178 2.76606 139	-0.996692	-	-0.263929	-
chr19:21359887-21360316	3.71954	chr19 21359887 21360316 MER57E3 chr19 21359878 21360229 NPC_H3K4me3_chr19_peak_4252 16 . 1.2222 2.60565 1.67725 175	0.517388	chr19 21359887 21360316 MER57E3 chr19 21359868 2136016NPC_H3K27ac_chr19_peak_7158 27 . 1.29791 3.80359 2.78996 141	-0.729457	-	-0.57606	-
chr19:21397622-21398105	4.53584	chr19 21397622 21398105 MER57E3 chr19 21397694 21397924 NPC_H3K4me3_chr19_peak_4260 19 . 1.24436 2.93934 1.95745 113	1.52435	chr19 21397622 21398105 MER57E3 chr19 21397430 2139763NPC_H3K27ac_chr19_peak_7166 25 . 1.2835 3.56351 2.58098 126	1.15626	-	0.298305	-
chr19:21462336-21462708	2.58021	chr19 21462336 21462708 MER57E3 chr19 21462238 21462793 NPC_H3K4me3_chr19_peak_4275 35 . 1.35574 4.81623 3.53382 212	1.62321	-	-0.223112	-	0.112109	-
chr19:21463004-21463067	2.94354	-	-6.10042	-	0.13639	-	-5.07587	-
chr19:21463377-21463449	4.17541	chr19 21463377 21463449 MER57E3 chr19 21463446 21463680 NPC_H3K4me3_chr19_peak_4276 13 . 1.19299 2.18984 1.32937 140	-0.0650159	chr19 21463377 21463449 MER57E3 chr19 21463436 2146369NPC_H3K27ac_chr19_peak_7175 21 . 1.25562 3.1145 2.19156 150	0.249112	-	-2.3669	-
chr19:21506126-21506179	3.44919	chr19 21506126 21506179 MER57E3 chr19 21505934 21506196 NPC_H3K4me3_chr19_peak_4287 17 . 1.22904 2.70703 1.76214 125	2.18952	chr19 21506126 21506179 MER57E3 chr19 21505924 2150620NPC_H3K27ac_chr19_peak_7185 27 . 1.29355 3.73045 2.72769 135	-0.485473	-	-3.61432	-
chr19:21506461-21506760	3.17402	chr19 21506461 21506760 MER57E3 chr19 21506459 21506839 NPC_H3K4me3_chr19_peak_4288 17 . 1.2263 2.66617 1.72687 169	-0.779252	-	0.397785	-	-1.87867	-
chr19:21507066-21507205	4.28002	chr19 21507066 21507205 MER57E3 chr19 21507013 21507304 NPC_H3K4me3_chr19_peak_4289 18 . 1.23401 2.78165 1.82423 145	-1.86471	-	3.35642	-	1.60737	-
chr19:21567177-21567245	-0.203214	-	-0.183079	-	0.322981	-	-2.15666	-
chr19:21567278-21567407	0.406142	-	-2.93209	-	0.158531	-	-1.54861	-
chr19:21567547-21567771	-0.621697	-	-1.04637	-	0.040545	-	-0.56577	-
chr19:21615543-21615833	0.370998	-	-4.42201	-	0.308472	-	-0.634324	-
chr19:21616130-21616264	4.2665	-	1.01072	-	0.879527	-	-0.796728	-
chr19:21616572-21616985	0.263914	-	0.939159	-	1.56389	-	-0.248866	-
chr19:21619921-21620223	-1.26576	-	0.171005	-	0.372331	-	-0.0139881	-
chr19:21621240-21621295	3.3754	-	1.31168	-	-2.08649	-	2.45527	-
chr19:21766301-21766711	3.55575	chr19 21766301 21766711 MER57E3 chr19 21766348 21766579 NPC_H3K4me3_chr19_peak_4347 33 . 1.3433 4.59228 3.34715 84	0.148887	chr19 21766301 21766711 MER57E3 chr19 21766354 2176662NPC_H3K27ac_chr19_peak_7219 28 . 1.307 3.92739 2.89882 215	-1.85322	-	-1.0541	-
chr19:21767006-21767079	5.15077	-	1.79751	-	0.245638	-	NA	-
chr19:22009331-22009467	0.521635	-	-0.0575112	-	1.53571	-	0.727491	-
chr19:22009764-22009903	0.658987	-	-2.30852	-	1.41085	-	-0.659267	-
chr19:22010212-22010440	1.36417	-	1.15251	-	1.24289	-	-0.459845	-
chr19:22052991-22053090	6.43288	chr19 22052991 22053090 MER57E3 chr19 22052917 22053172 NPC_H3K4me3_chr19_peak_4433 32 . 1.33839 4.50473 3.27192 38	4.94626	-	5.64929	-	5.32982	-
chr19:22053394-22053644	-0.357292	-	-0.204443	-	1.25949	-	-0.280646	-
chr19:22053949-22054065	1.74212	-	0.0519128	-	1.78187	-	-1.21284	-
chr19:22054366-22054408	3.86893	-	-2.88389	-	5.88008	chr19 22054366 22054408 MER57E3 chr19 22054312 2205466NPC_H3K9me3_chr19_peak_3908 20 . 1.25013 3.0286 2.01736 152	-1.0317	-
chr19:22214196-22214332	1.28587	-	-1.30217	-	1.80426	-	1.03266	-
chr19:22214618-22214757	1.18978	-	-2.55421	-	2.94673	-	-0.10957	-
chr19:22215070-22215294	-0.260491	-	-1.3232	-	-0.808584	chr19 22215070 22215294 MER57E3 chr19 22215259 2221577NPC_H3K9me3_chr19_peak_4020 16 . 1.21759 2.53812 1.61462 233	-1.68449	-
chr19:22286907-22287264	0.0868464	-	-1.15561	-	1.38375	-	0.401701	-
chr19:22287566-22287718	1.33806	-	-1.68244	-	2.03633	-	-0.604812	-
chr19:22421371-22421826	1.61144	chr19 22421371 22421826 MER57E3 chr19 22421283 22421510 NPC_H3K4me3_chr19_peak_4548 36 . 1.36383 4.96342 3.65704 202	-0.473026	-	0.881609	chr19 22421371 22421826 MER57E3 chr19 22421158 2242150NPC_H3K9me3_chr19_peak_4145 31 . 1.32933 4.34454 3.11594 172	-0.0207579	-
chr19:22440588-22440930	0.938701	-	-0.0980221	-	1.01578	chr19 22440588 22440930 MER57E3 chr19 22440364 2244072NPC_H3K9me3_chr19_peak_4160 24 . 1.28445 3.57927 2.4769 271|chr19 22440588 22440930 MER57E3 chr19 22440762 2244106NPC_H3K9me3_chr19_peak_4161 22 . 1.27131 3.36456 2.29607 140	-0.224229	-
chr19:22634837-22635298	0.984298	-	-1.404	chr19 22634837 22635298 MER57E3 chr19 22634496 2263492NPC_H3K27ac_chr19_peak_7269 36 . 1.35305 4.7674 3.63081 88	0.592959	chr19 22634837 22635298 MER57E3 chr19 22634546 2263485NPC_H3K9me3_chr19_peak_4325 22 . 1.2652 3.26647 2.21504 22	-0.857968	-
chr19:22782230-22782354	-1.80857	-	NA	-	-1.90818	-	-2.09332	-
chr19:22782967-22782997	-2.71802	-	-3.10131	-	-4.3093	-	-2.78328	-
chr19:22783299-22783661	-1.27971	-	-0.617789	-	-0.292653	chr19 22783299 22783661 MER57E3 chr19 22783555 2278379NPC_H3K9me3_chr19_peak_4402 25 . 1.28782 3.63499 2.52123 16	-1.89623	-
chr19:22832732-22833149	-0.108282	-	-0.728558	-	0.514935	-	-1.52323	-
chr19:22833449-22833490	3.05059	-	0.861498	-	3.72629	-	-0.219069	-
chr19:23001897-23002033	0.664636	chr19 23001897 23002033 MER57E3 chr19 23001772 23002028 NPC_H3K4me3_chr19_peak_4789 16 . 1.21949 2.56583 1.643 234	-2.15795	-	1.27484	-	-0.565151	-
chr19:23002321-23002672	-1.10479	-	NA	-	1.57317	chr19 23002321 23002672 MER57E3 chr19 23002504 2300280NPC_H3K9me3_chr19_peak_4570 21 . 1.26313 3.23343 2.18877 145	-1.82785	-
chr19:23075891-23076055	4.26581	chr19 23075891 23076055 MER57E3 chr19 23075394 23076046 NPC_H3K4me3_chr19_peak_4812 25 . 1.28484 3.58558 2.50109 280	2.98932	chr19 23075891 23076055 MER57E3 chr19 23075306 2307605NPC_H3K27ac_chr19_peak_7291 36 . 1.35226 4.75311 3.61845 362	-1.69309	-	-0.773805	-
chr19:23117527-23118013	4.72046	chr19 23117527 23118013 MER57E3 chr19 23117741 23118054 NPC_H3K4me3_chr19_peak_4819 29 . 1.31752 4.1385 2.96576 156	3.83666	chr19 23117527 23118013 MER57E3 chr19 23117360 2311771NPC_H3K27ac_chr19_peak_7303 20 . 1.24884 3.00855 2.09996 88|chr19 23117527 23118013 MER57E3 chr19 23117731 2311806NPC_H3K27ac_chr19_peak_7304 41 . 1.38664 5.38564 4.17017 166	0.824099	chr19 23117527 23118013 MER57E3 chr19 23117813 2311804NPC_H3K9me3_chr19_peak_4614 26 . 1.29663 3.78209 2.64383 135	0.282203	-
chr19:23248435-23248712	2.20525	-	1.08398	-	0.793389	-	0.740343	-
chr19:23249015-23249241	4.48727	chr19 23249015 23249241 MER57E3 chr19 23249014 23249267 NPC_H3K4me3_chr19_peak_4862 28 . 1.31122 4.03003 2.87541 142	-0.22774	-	1.31082	-	-0.99709	-
chr19:23249833-23249884	4.05424	-	2.37651	-	-3.37991	-	-4.38924	-
chr19:23272975-23273427	3.57347	chr19 23272975 23273427 MER57E3 chr19 23272672 23273091 NPC_H3K4me3_chr19_peak_4869 13 . 1.19221 2.17917 1.32377 144	-0.108494	-	-1.1567	-	-1.24327	-
chr19:23273725-23273754	3.87095	-	2.98274	chr19 23273725 23273754 MER57E3 chr19 23273696 2327391NPC_H3K27ac_chr19_peak_7333 16 . 1.21345 2.47808 1.64411 69	-2.63196	-	-0.912959	-
chr19:23394176-23394448	3.43091	-	1.5988	-	-0.072797	-	0.00946997	-
chr19:23394748-23394969	4.66238	chr19 23394748 23394969 MER57E3 chr19 23394772 23395305 NPC_H3K4me3_chr19_peak_4896 28 . 1.30888 3.98986 2.84087 182	2.65187	chr19 23394748 23394969 MER57E3 chr19 23394762 2339531NPC_H3K27ac_chr19_peak_7343 40 . 1.37755 5.21629 4.0226 192	-0.945107	-	0.220343	-
chr19:23414819-23415256	4.14084	chr19 23414819 23415256 MER57E3 chr19 23414745 23415339 NPC_H3K4me3_chr19_peak_4903 18 . 1.23457 2.79002 1.83099 334	1.47097	chr19 23414819 23415256 MER57E3 chr19 23414995 2341534NPC_H3K27ac_chr19_peak_7357 26 . 1.28779 3.63442 2.64583 269	-1.15095	-	-0.980514	-
chr19:23415538-23415582	7.10055	chr19 23415538 23415582 MER57E3 chr19 23415469 23415936 NPC_H3K4me3_chr19_peak_4904 20 . 1.24889 3.00936 2.01512 245	5.97918	chr19 23415538 23415582 MER57E3 chr19 23415459 2341604NPC_H3K27ac_chr19_peak_7358 30 . 1.31473 4.0904 3.04067 257	2.25803	-	-0.135563	-
chr19:23511361-23511632	1.14975	-	-1.1548	-	0.327604	-	-0.578589	-
chr19:23511938-23512153	1.45707	-	NA	-	-0.200612	-	-2.65563	-
chr19:23567789-23567851	-4.67221	chr19 23567789 23567851 MER57E3 chr19 23567576 23567815 NPC_H3K4me3_chr19_peak_4943 51 . 1.45896 6.78216 5.18458 75	NA	-	-0.303757	chr19 23567789 23567851 MER57E3 chr19 23567579 2356782NPC_H3K9me3_chr19_peak_4836 48 . 1.43737 6.35687 4.80364 135	-1.48881	-
chr19:23568980-23569385	0.0366201	-	-1.347	-	-0.0992375	-	-1.06716	-
chr19:23569670-23569701	NA	-	-4.07995	-	-1.10108	-	-5.34225	-
chr19:23577620-23578002	0.0435379	-	0.662931	-	0.650081	-	0.760431	-
chr19:23578298-23578313	2.19722	-	1.78394	-	0.270617	-	1.56727	-
chr19:23685861-23686337	3.20975	-	1.23831	-	-0.430176	-	-1.58479	-
chr19:23686625-23686677	2.35865	-	2.07618	-	-2.12073	-	-1.79616	-
chr19:23758361-23758416	2.92597	-	0.505014	-	-1.54854	-	-1.41192	-
chr19:23763453-23763486	4.33413	chr19 23763453 23763486 MER57E3 chr19 23762875 23763493 NPC_H3K4me3_chr19_peak_4981 24 . 1.27781 3.47019 2.40348 361	3.27769	chr19 23763453 23763486 MER57E3 chr19 23762883 2376350NPC_H3K27ac_chr19_peak_7383 34 . 1.34034 4.53938 3.4334 437	0.370613	-	-1.37573	-
chr19:23763769-23764239	3.76971	-	0.201812	chr19 23763769 23764239 MER57E3 chr19 23763636 2376384NPC_H3K27ac_chr19_peak_7384 20 . 1.24213 2.90505 2.01043 53	-0.435806	-	-2.44433	-
chr19:23791102-23791212	NA	-	3.68559	-	NA	-	-2.42971	-
chr19:23791299-23791571	1.30209	-	1.03659	chr19 23791299 23791571 MER57E3 chr19 23791501 2379170NPC_H3K27ac_chr19_peak_7395 31 . 1.32014 4.18394 3.12246 19	-0.973441	-	-1.08505	-
chr19:23915349-23915576	-1.16572	-	-4.18753	-	0.130024	-	-0.748753	-
chr19:23915881-23916160	1.49219	chr19 23915881 23916160 MER57E3 chr19 23915843 23916156 NPC_H3K4me3_chr19_peak_5031 38 . 1.37424 5.15489 3.81894 152	0.56356	chr19 23915881 23916160 MER57E3 chr19 23915831 2391613NPC_H3K27ac_chr19_peak_7410 51 . 1.44415 6.48965 5.1344 152	0.267145	-	-0.873689	-
chr19:24019765-24020099	-1.86486	-	-2.01787	-	0.580402	-	-5.76591	-
chr19:24020180-24020280	-0.822101	-	-5.46612	-	1.20464	-	-2.19491	-
chr19:24087677-24087906	5.97532	chr19 24087677 24087906 MER57E3 chr19 24087611 24087987 NPC_H3K4me3_chr19_peak_5079 28 . 1.30685 3.95527 2.81096 220	5.21256	chr19 24087677 24087906 MER57E3 chr19 24087601 2408799NPC_H3K27ac_chr19_peak_7429 39 . 1.37542 5.17681 3.98756 230	-9.18794	-	1.9268	-
chr19:24088207-24088479	3.07336	-	-0.223675	-	-0.630187	-	-0.759123	-
chr21:5501573-5502070	4.54204	-	0.799782	chr21 5501573 5502070 MER57E3 chr21 5499199 5503558 NPC_H3K27ac_chr21_peak_207 20 . 1.24383 2.9312 2.01783 2238	0.0624609	-	-0.893217	-
chr21:5554134-5554623	4.66109	-	1.07056	chr21 5554134 5554623 MER57E3 chr21 5552482 5574904 NPC_H3K27ac_chr21_peak_236 21 . 1.25632 3.12548 2.18571 8390	0.13847	-	-0.924042	-
chr21:5587144-5587261	0.508243	-	1.59138	chr21 5587144 5587261 MER57E3 chr21 5583170 5591610 NPC_H3K27ac_chr21_peak_240 20 . 1.24569 2.95981 2.04297 3176	0.467181	-	-0.450005	-
chr21:6233708-6233825	-1.02405	-	1.51928	chr21 6233708 6233825 MER57E3 chr21 6229558 6237998 NPC_H3K27ac_chr21_peak_517 20 . 1.24581 2.96172 2.04469 5162	0.0975555	-	-0.302019	-
chr21:6266349-6266838	4.64817	-	1.01602	chr21 6266349 6266838 MER57E3 chr21 6242070 6268689 NPC_H3K27ac_chr21_peak_520 21 . 1.25619 3.1235 2.18571 17889	0.135709	-	-0.948609	-
chr21:6318902-6319399	4.53544	-	0.799572	chr21 6318902 6319399 MER57E3 chr21 6317649 6333041 NPC_H3K27ac_chr21_peak_550 20 . 1.24383 2.9312 2.01783 4900	0.0801144	-	-0.888927	-
chr21:6355675-6355792	-0.564888	-	0.564122	chr21 6355675 6355792 MER57E3 chr21 6353875 6362495 NPC_H3K27ac_chr21_peak_555 20 . 1.24383 2.9312 2.01783 5839	0.532826	-	-0.440111	-
chr21:6633333-6633450	-0.564888	-	0.585014	chr21 6633333 6633450 MER57E3 chr21 6630369 6635449 NPC_H3K27ac_chr21_peak_676 20 . 1.24383 2.9312 2.01783 2310	0.532377	-	-0.405339	-
chr21:6669726-6670223	4.5412	-	0.799782	chr21 6669726 6670223 MER57E3 chr21 6647893 6671675 NPC_H3K27ac_chr21_peak_680 20 . 1.24383 2.9312 2.01783 18667	0.0785095	-	-0.893217	-
chr21:6722287-6722776	4.64712	-	1.12607	chr21 6722287 6722776 MER57E3 chr21 6720635 6739219 NPC_H3K27ac_chr21_peak_711 20 . 1.24383 2.9312 2.01783 15666	0.13847	-	-0.929904	-
chr21:6996796-6997293	4.54704	-	0.799782	chr21 6996796 6997293 MER57E3 chr21 6984405 6998745 NPC_H3K27ac_chr21_peak_768 20 . 1.24383 2.9312 2.01783 2583	0.0785095	-	-0.893217	-
chr21:7049356-7049845	4.62874	-	1.01283	chr21 7049356 7049845 MER57E3 chr21 7047704 7070126 NPC_H3K27ac_chr21_peak_799 21 . 1.25632 3.12548 2.18571 8390	0.13847	-	-0.924042	-
chr21:7082370-7082487	-0.655482	-	1.33286	chr21 7082370 7082487 MER57E3 chr21 7078396 7086836 NPC_H3K27ac_chr21_peak_803 20 . 1.24569 2.95981 2.04297 3176	0.467181	-	-0.293286	-
chr21:7378574-7379071	4.54828	-	0.799782	chr21 7378574 7379071 MER57E3 chr21 7378053 7380559 NPC_H3K27ac_chr21_peak_935 20 . 1.24383 2.9312 2.01783 1209	0.0785095	-	-0.893217	-
chr21:7431134-7431623	4.64197	-	1.01283	chr21 7431134 7431623 MER57E3 chr21 7429482 7451904 NPC_H3K27ac_chr21_peak_966 21 . 1.25632 3.12548 2.18571 8390	0.13847	-	-0.971832	-
chr21:7464148-7464265	-0.655482	-	1.33286	chr21 7464148 7464265 MER57E3 chr21 7460174 7468614 NPC_H3K27ac_chr21_peak_970 20 . 1.24569 2.95981 2.04297 3176	0.467181	-	-0.293286	-
chr21:7674139-7674256	-0.655482	-	1.32032	chr21 7674139 7674256 MER57E3 chr21 7669989 7678429 NPC_H3K27ac_chr21_peak_1081 20 . 1.24581 2.96172 2.04469 5162	0.466128	-	-0.2496	-
chr21:14027903-14028392	4.41605	chr21 14027903 14028392 MER57E3 chr21 14027676 14027926 NPC_H3K4me3_chr21_peak_563 17 . 1.22767 2.68664 1.70744 73|chr21 14027903 14028392 MER57E3 chr21 14028348 14028577 NPC_H3K4me3_chr21_peak_564 13 . 1.19465 2.21278 1.3044 48	0.132312	chr21 14027903 14028392 MER57E3 chr21 14026861 1402806NPC_H3K27ac_chr21_peak_3228 25 . 1.27943 3.49676 2.5162 423	-0.524557	-	-0.888983	-
chr4:53792-53979	3.31694	chr4 53792 53979 MER57E3 chr4 51280 65039 NPC_H3K4me3_chr4_peak_6 14 . 1.19214 2.178151.44959 6045	-0.359103	-	1.03076	-	-0.240482	-
chr4:124971-125157	4.62295	chr4 124971 125157 MER57E3 chr4 123938 127237 NPC_H3K4me3_chr4_peak_54 91 . 1.6663611.126 9.15618 1711	2.37195	chr4 124971 125157 MER57E3 chr4 124199 125349 NPC_H3K27ac_chr4_peak_626 . 1.27509 3.42592 2.61285 660	-0.254328	-	-0.964689	-
chr4:213118-213310	5.04338	chr4 213118 213310 MER57E3 chr4 213011 214512 NPC_H3K4me3_chr4_peak_124 40 . 1.375555.1792 4.07327 950	1.94113	chr4 213118 213310 MER57E3 chr4 213017 213378 NPC_H3K27ac_chr4_peak_988 . 1.63327 10.4092 8.84448 68	1.84227	-	-0.551522	-
chr4:304811-305000	2.07992	chr4 304811 305000 MER57E3 chr4 304412 304949 NPC_H3K4me3_chr4_peak_219 30 . 1.307973.97433 3.01496 235	-0.877665	chr4 304811 305000 MER57E3 chr4 304790 305003 NPC_H3K27ac_chr4_peak_125 68 . 1.52514 8.12371 6.82361 166	-0.287857	-	-1.17865	-
chr4:338303-338490	4.25359	chr4 338303 338490 MER57E3 chr4 336071 340305 NPC_H3K4me3_chr4_peak_245 81 . 1.607999.86649 8.11734 1824	0.371256	chr4 338303 338490 MER57E3 chr4 337881 338470 NPC_H3K27ac_chr4_peak_148 82 . 1.60127 9.72297 8.24338 261	-1.0489	-	-1.63437	-
chr4:386622-386810	5.59184	chr4 386622 386810 MER57E3 chr4 386356 387056 NPC_H3K4me3_chr4_peak_283 68 . 1.536048.34928 6.83348 571	2.30553	-	1.28574	-	-1.1957	-
chr4:473487-473631	6.2288	chr4 473487 473631 MER57E3 chr4 472704 475252 NPC_H3K4me3_chr4_peak_363 22 . 1.253243.07722 2.22867 1050	2.89878	chr4 473487 473631 MER57E3 chr4 473042 473488 NPC_H3K27ac_chr4_peak_218 87 . 1.62974 10.3332 8.77988 75	0.777439	-	1.38341	chr4 473487 473631 MER57E3 chr4 473447 473695 NPC_H3K27me3_chr4_peak_83 24 . 1.27919 3.49279 2.42348 93
chr4:141859582-141859965	2.2243	chr4 141859582 141859965 MER57E3 chr4 141859210 141859719 NPC_H3K4me3_chr4_peak_58822 82 . 1.62854 10.0813 8.29528 434	2.18309	-	1.73763	-	0.952456	-
chr5:172618168-172618210	0.575717	-	2.39068	-	-2.00797	-	0.528465	-
chr7:56447830-56447872	10.7247	-	2.00251	-	10.3978	chr7 56447830 56447872 MER57E3 chr7 56447759 5644799NPC_H3K9me3_chr7_peak_12612 52 . 1.46362 6.875 5.21752 85	8.90223	-
chr7:57131597-57131930	1.61378	chr7 57131597 57131930 MER57E3 chr7 57131507 57131862 NPC_H3K4me3_chr7_peak_17103 25 . 1.2797 3.50111 2.56193 224	-1.084	-	2.12847	-	-0.202173	-
chr7:57255798-57256206	-0.619743	-	NA	-	1.53483	-	0.392559	-
chr7:57256543-57256583	1.79008	-	0.439463	chr7 57256543 57256583 MER57E3 chr7 57256395 5725663NPC_H3K27ac_chr7_peak_25928 72 . 1.5543 8.73007 7.27152 131	-0.00735926	-	1.4819	-
chr7:57450683-57451026	1.27198	-	-1.48922	-	0.657056	-	-0.0788414	-
chr7:57451314-57451441	2.21705	chr7 57451314 57451441 MER57E3 chr7 57451210 57451427 NPC_H3K4me3_chr7_peak_17315 39 . 1.37367 5.14438 3.99181 107	-4.69322	-	-2.35319	-	1.00695	-
chr7:57451747-57451762	6.85236	chr7 57451747 57451762 MER57E3 chr7 57451631 57451857 NPC_H3K4me3_chr7_peak_17316 38 . 1.36381 4.96318 3.83284 111	1.09642	chr7 57451747 57451762 MER57E3 chr7 57451624 5745185NPC_H3K27ac_chr7_peak_25982 52 . 1.43916 6.39184 5.20385 60	9.23422	-	10.481	-
chr7:57452062-57452092	1.85235	chr7 57452062 57452092 MER57E3 chr7 57452002 57452275 NPC_H3K4me3_chr7_peak_17317 33 . 1.33191 4.38994 3.33241 66	2.96006	chr7 57452062 57452092 MER57E3 chr7 57451950 5745216NPC_H3K27ac_chr7_peak_25983 44 . 1.39802 5.59985 4.49924 97	2.65034	chr7 57452062 57452092 MER57E3 chr7 57452022 5745224NPC_H3K9me3_chr7_peak_13171 14 . 1.20509 2.3587 1.47874 83	0.957407	-
chr7:63303263-63303594	0.871165	chr7 63303263 63303594 MER57E3 chr7 63303292 63303522 NPC_H3K4me3_chr7_peak_18676 20 . 1.23959 2.86625 2.01106 59	-0.695899	-	2.6146	-	1.12004	-
chr7:63323519-63323550	-0.912401	-	-3.38648	-	0.710042	-	-0.958003	-
chr7:63323943-63324357	0.0695983	-	-2.39457	-	0.572513	-	-0.332763	-
chr7:63423766-63424180	-0.00746038	-	-2.35184	-	0.66104	-	-0.323888	-
chr7:63424573-63424604	-1.01825	-	-5.06306	-	0.669585	-	-0.949953	-
chr7:63444595-63444926	1.17381	-	-0.736838	-	2.84367	-	1.32829	-
chr7:63999355-63999697	0.936613	chr7 63999355 63999697 MER57E3 chr7 63999252 63999553 NPC_H3K4me3_chr7_peak_19092 56 . 1.47326 7.0676 5.6611 141	-0.0066872	-	1.02766	chr7 63999355 63999697 MER57E3 chr7 63999250 6399975NPC_H3K9me3_chr7_peak_13808 31 . 1.33308 4.41063 3.19714 159	1.02714	chr7 63999355 63999697 MER57E3 chr7 63999315 6399975NPC_H3K27me3_chr7_peak_11482 14 . 1.21771 2.4245 1.46188 160
chr7:64000000-64000119	0.179768	-	-0.0263676	-	1.81316	chr7 64000000 64000119 MER57E3 chr7 63999876 6400023NPC_H3K9me3_chr7_peak_13809 28 . 1.30805 3.9756 2.83279 185	1.10369	-
chr7:64000750-64000769	-1.33187	-	-6.13525	chr7 64000750 64000769 MER57E3 chr7 64000261 6400077NPC_H3K27ac_chr7_peak_27761 19 . 1.2299 2.71983 1.94973 299	-3.48264	-	-2.02595	-
chr7:64045964-64046016	-4.1182	chr7 64045964 64046016 MER57E3 chr7 64045777 64045992 NPC_H3K4me3_chr7_peak_19121 63 . 1.53874 7.86339 6.34517 126	NA	-	1.52005	-	0.989369	-
chr7:64046322-64046349	NA	-	NA	-	NA	chr7 64046322 64046349 MER57E3 chr7 64046151 6404640NPC_H3K9me3_chr7_peak_13842 59 . 1.50752 7.76142 5.92215 123	NA	-
chr7:64046739-64047165	-0.326942	-	NA	-	1.69958	chr7 64046739 64047165 MER57E3 chr7 64046884 6404778NPC_H3K9me3_chr7_peak_13843 49 . 1.44458 6.49815 4.9146 397	-0.295942	-
chr7:64207598-64207706	-0.0719567	-	-2.44237	-	2.22709	-	-0.891285	-
chr7:64208003-64208244	0.190371	-	-2.11102	-	1.72204	-	0.458947	-
chr7:64249508-64249851	-0.0672454	-	-1.16552	-	0.957507	chr7 64249508 64249851 MER57E3 chr7 64249491 6424969NPC_H3K9me3_chr7_peak_13977 16 . 1.2161 2.51644 1.61181 69	-0.208186	-
chr7:64250141-64250265	0.822622	chr7 64250141 64250265 MER57E3 chr7 64250139 64250353 NPC_H3K4me3_chr7_peak_19263 17 . 1.21643 2.52132 1.71573 87	-2.44816	-	1.94136	-	0.961042	-
chr7:64250561-64250588	-0.0581999	chr7 64250561 64250588 MER57E3 chr7 64250445 64250653 NPC_H3K4me3_chr7_peak_19264 25 . 1.28123 3.52621 2.58233 48	NA	-	-7.96861	-	0.464404	-
chr7:64314513-64314569	1.92064	-	NA	-	2.31396	-	0.611454	-
chr7:64314872-64314891	2.79811	chr7 64314872 64314891 MER57E3 chr7 64314580 64315477 NPC_H3K4me3_chr7_peak_19307 87 . 1.64542 10.6717 8.70898 615	NA	-	2.40707	-	1.30545	-
chr7:64315272-64315720	0.15944	chr7 64315272 64315720 MER57E3 chr7 64314580 64315477 NPC_H3K4me3_chr7_peak_19307 87 . 1.64542 10.6717 8.70898 615	-2.69668	-	0.319811	chr7 64314872 64314891 MER57E3 chr7 64314774 6431523NPC_H3K9me3_chr7_peak_14025 58 . 1.50136 7.63564 5.82172 235	-0.604192	chr7 64315272 64315720 MER57E3 chr7 64315220 6431549NPC_H3K27me3_chr7_peak_11517 32 . 1.35734 4.63476 3.26634 102
chr7:64464386-64464552	3.50654	chr7 64464386 64464552 MER57E3 chr7 64464321 64464649 NPC_H3K4me3_chr7_peak_19419 92 . 1.67536 11.322 9.24414 188	0.414364	chr7 64464386 64464552 MER57E3 chr7 64464348 6446462NPC_H3K27ac_chr7_peak_27862 41 . 1.39965 5.1702 4.11672 183	-0.35615	chr7 64464386 64464552 MER57E3 chr7 64464044 6446439NPC_H3K9me3_chr7_peak_14154 60 . 1.51373 7.88868 6.02173 170	-0.485584	-
chr7:64464848-64465164	0.463804	-	-2.45832	-	0.885716	chr7 64464848 64465164 MER57E3 chr7 64464880 6446516NPC_H3K9me3_chr7_peak_14155 26 . 1.29596 3.77079 2.66186 43	-0.593555	-
chr7:64562250-64562607	0.722868	chr7 64562250 64562607 MER57E3 chr7 64562345 64562650 NPC_H3K4me3_chr7_peak_19481 35 . 1.34559 4.63326 3.54385 280	-0.545324	chr7 64562250 64562607 MER57E3 chr7 64561780 6456230NPC_H3K27ac_chr7_peak_27899 19 . 1.2299 2.71983 1.94973 201	1.31267	chr7 64562250 64562607 MER57E3 chr7 64562350 6456262NPC_H3K9me3_chr7_peak_14227 38 . 1.37701 5.20617 3.85749 75	-1.03927	-
chr7:64575207-64575236	0.680172	-	0.0291229	-	2.65846	chr7 64575207 64575236 MER57E3 chr7 64574389 6457523NPC_H3K9me3_chr7_peak_14237 39 . 1.38506 5.3561 3.98147 437	0.428954	-
chr7:64575265-64575287	-0.0471954	-	-0.374718	-	0.165675	-	0.337375	-
chr7:64575588-64575641	2.32705	-	3.55297	chr7 64575588 64575641 MER57E3 chr7 64575416 6457569NPC_H3K27ac_chr7_peak_27908 19 . 1.2299 2.71983 1.94973 86	1.10474	-	3.46518	-
chr7:64575948-64576013	1.21944	-	-1.21909	-	0.802367	-	0.126044	-
chr7:64576443-64576647	3.10556	chr7 64576443 64576647 MER57E3 chr7 64576423 64576665 NPC_H3K4me3_chr7_peak_19486 18 . 1.2304 2.72739 1.89331 139	0.191872	-	-0.498842	-	-0.66853	-
chr7:64666676-64667158	4.05065	chr7 64666676 64667158 MER57E3 chr7 64666486 64667462 NPC_H3K4me3_chr7_peak_19537 20 . 1.24601 2.9648 2.09615 558	0.960693	chr7 64666676 64667158 MER57E3 chr7 64666078 6466691NPC_H3K27ac_chr7_peak_27942 19 . 1.2299 2.71983 1.94973 363	0.626749	-	-0.940603	-
chr7:64794916-64795388	4.63509	chr7 64794916 64795388 MER57E3 chr7 64794633 64795076 NPC_H3K4me3_chr7_peak_19607 65 . 1.5265 8.15176 6.59211 226|chr7 64794916 64795388 MER57E3 chr7 64795103 64796573 NPC_H3K4me3_chr7_peak_19608 47 . 1.41847 5.99022 4.72715 597	2.77299	chr7 64794916 64795388 MER57E3 chr7 64793855 6479548NPC_H3K27ac_chr7_peak_27993 82 . 1.60636 9.8316 8.23118 916	0.100099	chr7 64794916 64795388 MER57E3 chr7 64795297 6479549NPC_H3K9me3_chr7_peak_14388 28 . 1.30708 3.95917 2.81843 169	-0.37864	-
chr7:64903741-64904086	4.05813	chr7 64903741 64904086 MER57E3 chr7 64903513 64903829 NPC_H3K4me3_chr7_peak_19653 42 . 1.39167 5.48008 4.28483 146|chr7 64903741 64904086 MER57E3 chr7 64903832 64904055 NPC_H3K4me3_chr7_peak_19654 35 . 1.34559 4.63326 3.54385 152	1.33147	chr7 64903741 64904086 MER57E3 chr7 64903283 6490397NPC_H3K27ac_chr7_peak_28031 59 . 1.48172 7.23756 5.95419 364	-1.59293	-	-0.263155	-
chr7:64904389-64904533	4.20313	chr7 64904389 64904533 MER57E3 chr7 64904174 64904720 NPC_H3K4me3_chr7_peak_19655 68 . 1.53906 8.41206 6.81191 335	2.5055	chr7 64904389 64904533 MER57E3 chr7 64904171 6490467NPC_H3K27ac_chr7_peak_28032 84 . 1.61897 10.1016 8.46551 296	-1.48848	-	0.99246	-
chr7:65005695-65006181	3.99262	chr7 65005695 65006181 MER57E3 chr7 65005167 65005968 NPC_H3K4me3_chr7_peak_19720 39 . 1.37223 5.1178 3.96759 348|chr7 65005695 65006181 MER57E3 chr7 65006039 65006252 NPC_H3K4me3_chr7_peak_19721 20 . 1.24207 2.9042 2.045 161	1.45797	chr7 65005695 65006181 MER57E3 chr7 65005921 6500697NPC_H3K27ac_chr7_peak_28068 19 . 1.2299 2.71983 1.94973 606	0.111892	-	-0.333913	-
chr7:65374361-65374853	3.87278	chr7 65374361 65374853 MER57E3 chr7 65373948 65374369 NPC_H3K4me3_chr7_peak_19832 15 . 1.20155 2.30875 1.53258 166|chr7 65374361 65374853 MER57E3 chr7 65374490 65374743 NPC_H3K4me3_chr7_peak_19833 33 . 1.33176 4.38728 3.33029 125|chr7 65374361 65374853 MER57E3 chr7 65374815 65375999 NPC_H3K4me3_chr7_peak_19834 35 . 1.34759 4.66915 3.57574 549	1.04282	chr7 65374361 65374853 MER57E3 chr7 65373303 6537465NPC_H3K27ac_chr7_peak_28343 23 . 1.26123 3.20324 2.37306 702	-0.811807	-	-0.569287	-
chrY:17609136-17609293	3.00866	-	0.541887	-	0.155418	-	1.64042	-
chrY:17609597-17609638	NA	-	NA	-	NA	-	NA	-
chrY:18296370-18296411	NA	-	NA	-	NA	-	NA	-
chrY:18296715-18296872	0.970247	-	NA	-	-2.3742	-	-2.88119	-

## Sheet: Suppl. Table 3
Supplementary Table 3. single guide RNAs targeting single and multiple MER57E3 copies, and ZNF678.
Target TE	oligo gRNA name	oligo gRNA sequence (5'-3')	Target TE genomic location (GRCh38/hg38)
MER57E3 copy 1	s_MER57E3_copy_1_1	CACCGGAGCGCCCAGCTATGGTGTG	chr1:227564046-227564512
	as_MER57E3_copy_1_1	AAACCACACCATAGCTGGGCGCTCC
	s_MER57E3_copy_1_2	CACCGATTAGCAGGCAATTAGACTG
	as_MER57E3_copy_1_2	AAACCAGTCTAATTGCCTGCTAATC
	s_MER57E3_copy_1_3	CACCGCCACCTGGACAGTCCAAATA
	as_MER57E3_copy_1_3	AAACTATTTGGACTGTCCAGGTGGC
MER57E3 set 1 (18 copies)	s_MER57E3_set_1	CACCGTGTGAAAATAATTAAGTGGC	chr7:64794916-64795388 chr7:65005695-65006181 chr7:65374361-65374853 chr19:19820132-19820413 chr19:20275158-20275573 chr19:20564697-20564938 chr19:20666161-20666618 chr19:20777138-20777596 chr19:21128498-21128747 chr19:21268552-21268850 chr19:21359887-21360316 chr19:21397622-21398105 chr19:22009331-22009467 chr19:22053949-22054065 chr19:23685861-23686337 chr19:23001897-23002033 chr19:23791299-237…
	as_MER57E3_set_1	AAACGCCACTTAATTATTTTCACAC
MER57E3 set 2 (10 copies)	s_MER57E3_set_2	CACCGACCAGAGGGGCATAAAGGAA	chr21:5501573-5502070 chr21:5554134-5554623 chr21:6266349-6266838 chr21:6318902-6319399 chr21:6669726-6670223 chr21:6722287-6722776 chr21:6996796-6997293 chr21:7049356-7049845 chr21:7378574-7379071 chr21:7431134-7431623
	as_MER57E3_set_2	AAACTTCCTTTATGCCCCTCTGGTC
MER57E3 set 3 (7 copies)	s_MER57E3_set_3	CACCGTTATGTAATCAGAGGTTAAT	chr19:11852830-11852925 chr19:11893140-11893391 chr19:21142542-21143027 chr19:22009764-22009903 chr19:22214618-22214757 chr19:23002321-23002672 chr19:23685861-23686337
	as_MER57E3_set_3	AAACATTAACCTCTGATTACATAAC
MER57E3 combined (35 copies)	s_MER57E3_set_1	CACCGTGTGAAAATAATTAAGTGGC	MER57E3 sets 1, 2 and 3
	as_MER57E3_set_1	AAACGCCACTTAATTATTTTCACAC
	s_MER57E3_set_2	CACCGACCAGAGGGGCATAAAGGAA
	as_MER57E3_set_2	AAACTTCCTTTATGCCCCTCTGGTC
	s_MER57E3_set_3	CACCGTTATGTAATCAGAGGTTAAT
	as_MER57E3_set_3	AAACATTAACCTCTGATTACATAAC
ZNF678	s_ZNF678_1	CACCGCTGCAGCAGCAGAGTCACCA	chr1:227563543-227679669
	as_ZNF678_1	AAACTGGTGACTCTGCTGCTGCAGC
	s_ZNF678_2	CACCGTATTTATCCCCAGCTGCGGG
	as_ZNF678_2	AAACCCCGCAGCTGGGGATAAATAC
	s_ZNF678_3	CACCGCGGCTATTTATCCCCAGCTG
	as_ZNF678_3	AAACCAGCTGGGGATAAATAGCCGC

## Sheet: Suppl. Table 4
Supplementary Table 4. Differential expression analysis for CRISPRi-mediated knockdown of MER57E3 copy 1 compared to the NT control.
gene	baseMean	log2FoldChange	lfcSE	stat	pvalue	padj	regulation
WASH7P	45.0501	0.100079	0.372744	0.268491	0.788321	0.941301	Not-sig.
ENSG00000278267	12.2475	-0.912929	0.65301	-1.39803	0.162104	0.519195	Not-sig.
ENSG00000243485	10.8032	0.391445	0.722545	0.541759	0.587984	0.861168	Not-sig.
WASH9P	30.1915	0.0441419	0.477797	0.0923863	0.926391	0.982282	Not-sig.
ENSG00000239945	18.0343	-0.249078	0.602654	-0.413302	0.679386	0.90525	Not-sig.
MTND2P28	22.0587	0.370587	0.526418	0.703979	0.481446	0.802149	Not-sig.
MTCO1P12	53.2861	0.458491	0.319526	1.43491	0.151314	0.502202	Not-sig.
MTATP6P1	1188.14	-0.167332	0.321171	-0.521007	0.602362	0.868846	Not-sig.
ENSG00000241599	28.7791	-0.329324	0.454321	-0.724872	0.468531	0.7937	Not-sig.
LINC01409	11.6749	0.159008	0.677248	0.234785	0.814376	0.951428	Not-sig.
LINC00115	21.7158	-0.586959	0.558476	-1.051	0.293258	0.667941	Not-sig.
LINC01128	98.5235	0.443883	0.245703	1.80658	0.0708275	0.340202	Not-sig.
ENSG00000236601	40.915	-0.0441751	0.382714	-0.115426	0.908108	0.977725	Not-sig.
LINC02593	32.57	-0.0163106	0.463318	-0.0352039	0.971917	0.994053	Not-sig.
SAMD11	21.7014	0.237938	0.529916	0.449011	0.653424	0.892986	Not-sig.
NOC2L	1414.61	-0.0385286	0.0976156	-0.394697	0.693066	0.908959	Not-sig.
KLHL17	380.604	-0.245775	0.162818	-1.5095	0.13117	0.469489	Not-sig.
ENSG00000290385	416.711	-0.790592	0.324434	-2.43684	0.0148164	0.132718	Not-sig.
HES4	2086.65	-0.308574	0.144931	-2.1291	0.0332457	0.222506	Not-sig.
ISG15	206.655	-0.0308546	0.174333	-0.176987	0.859519	0.963162	Not-sig.
AGRN	11586.6	0.110427	0.0807215	1.368	0.171313	0.530354	Not-sig.
ENSG00000233653	37.6184	0.189232	0.417521	0.453227	0.650386	0.891307	Not-sig.
ENSG00000278757	21.5095	-0.291113	0.572242	-0.508724	0.610946	0.872466	Not-sig.
C1orf159	262.839	-0.144958	0.188992	-0.767007	0.443077	0.777914	Not-sig.
SDF4	1739.45	0.119489	0.0760983	1.57019	0.11637	0.443035	Not-sig.
B3GALT6	846.351	0.246836	0.110649	2.23079	0.025695	0.189903	Not-sig.
C1QTNF12	60.6298	0.0622766	0.292421	0.212969	0.831351	0.956262	Not-sig.
UBE2J2	834.925	0.137992	0.0994934	1.38695	0.165457	0.523567	Not-sig.
LINC01786	17.2977	-0.340678	0.561488	-0.606741	0.544023	0.83838	Not-sig.
SCNN1D	130.691	-0.038896	0.270522	-0.143782	0.885673	0.97131	Not-sig.
ACAP3	444.828	0.128474	0.199212	0.644911	0.518985	0.82569	Not-sig.
PUSL1	121.542	0.170533	0.220437	0.773612	0.43916	0.775056	Not-sig.
INTS11	1346.28	0.0643324	0.0975222	0.659669	0.509466	0.818851	Not-sig.
ENSG00000225630	24.7982	-0.183279	0.589036	-0.311151	0.755686	0.932424	Not-sig.
CPTP	232.403	0.0315358	0.179228	0.175953	0.860331	0.963373	Not-sig.
DVL1	1328.86	-0.0131394	0.100766	-0.130395	0.896254	0.974781	Not-sig.
MXRA8	352.028	0.461702	0.161846	2.85271	0.00433475	0.0598365	Not-sig.
AURKAIP1	791.473	0.158951	0.119496	1.33018	0.18346	0.548526	Not-sig.
CCNL2	1517.16	0.144412	0.210024	0.687598	0.491706	0.808238	Not-sig.
MRPL20.AS1	294.032	0.417202	0.144697	2.88328	0.00393555	0.0556164	Not-sig.
MRPL20	448.109	-0.0198384	0.134301	-0.147716	0.882567	0.969894	Not-sig.
MRPL20.DT	100.245	-0.474717	0.27044	-1.75535	0.0791992	0.362201	Not-sig.
ANKRD65	31.9891	-0.0987979	0.402435	-0.2455	0.806069	0.947809	Not-sig.
TMEM88B	100.096	-0.152457	0.258032	-0.590847	0.554623	0.846341	Not-sig.
VWA1	347.553	0.460332	0.13582	3.38928	0.000700768	0.0172721	Not-sig.
ATAD3B	316.47	-0.22045	0.194168	-1.13536	0.256226	0.636015	Not-sig.
ATAD3A	450.71	-0.0170072	0.131537	-0.129296	0.897124	0.974962	Not-sig.
TMEM240	172.226	0.197619	0.201242	0.981997	0.326101	0.69767	Not-sig.
SSU72	1468.68	0.0921075	0.0908173	1.01421	0.310484	0.683741	Not-sig.
ENSG00000229344	10.9181	-0.735699	0.706329	-1.04158	0.297606	0.672522	Not-sig.
FNDC10	328.055	0.173793	0.154434	1.12536	0.260438	0.64027	Not-sig.
ENSG00000198744	175.507	0.0740349	0.201984	0.366538	0.713964	0.917799	Not-sig.
MIB2	865.138	0.343098	0.144703	2.37106	0.0177374	0.149042	Not-sig.
MMP23B	52.4743	-0.0361007	0.340449	-0.106038	0.915552	0.980243	Not-sig.
CDK11B	671.901	0.011976	0.113283	0.105717	0.915807	0.980243	Not-sig.
SLC35E2B	1925.47	0.11811	0.0806988	1.46359	0.143307	0.490881	Not-sig.
ENSG00000284662	14.6275	-1.41389	0.691524	-2.0446	0.0408942	0.251382	Not-sig.
CDK11A	17.9583	0.819902	0.53827	1.52322	0.127704	0.464618	Not-sig.
ENSG00000229376	33.5387	0.0366241	0.427217	0.0857273	0.931683	0.983344	Not-sig.
ENSG00000291215	117.708	0.255343	0.234827	1.08737	0.276875	0.655993	Not-sig.
ENSG00000223181	80.9743	0.28097	0.277123	1.01388	0.31064	0.683987	Not-sig.
NADK	972.048	-0.0332773	0.104705	-0.317819	0.750622	0.930903	Not-sig.
GNB1	8913.98	-0.166734	0.0618913	-2.69398	0.00706039	0.0835298	Not-sig.
TMEM52	52.6249	0.129335	0.342101	0.378061	0.705385	0.9143	Not-sig.
PRKCZ	718.052	0.325649	0.114944	2.83312	0.00460964	0.0625739	Not-sig.
PRKCZ.AS1	50.3252	0.262276	0.344559	0.761192	0.446542	0.780345	Not-sig.
FAAP20	952.214	0.111919	0.107972	1.03655	0.299946	0.674939	Not-sig.
SKI	1774.86	0.262577	0.107005	2.45387	0.0141329	0.128694	Not-sig.
ENSG00000290784	115.051	-0.277967	0.306235	-0.907693	0.364041	0.728331	Not-sig.
MORN1	105.078	0.375457	0.267447	1.40386	0.160361	0.516161	Not-sig.
ENSG00000177757	21.2582	1.56395	0.53447	2.92617	0.00343158	0.0510423	Not-sig.
RER1	917.217	-0.0891463	0.0947971	-0.940391	0.347017	0.71371	Not-sig.
PEX10	261.767	0.333104	0.156638	2.12658	0.0334552	0.223385	Not-sig.
PLCH2	53.9849	1.30723	0.371895	3.51505	0.000439665	0.0124761	Up
PANK4	775.39	-0.173689	0.103304	-1.68133	0.0926981	0.394166	Not-sig.
HES5	285.633	0.56935	0.595463	0.956146	0.338998	0.707723	Not-sig.
ENSG00000234711	115.587	-0.220773	0.229823	-0.960625	0.336741	0.705499	Not-sig.
PRXL2B	621.886	0.425411	0.125551	3.38836	0.000703132	0.017275	Not-sig.
TTC34	26.4553	1.12753	0.532924	2.11574	0.0343671	0.226463	Not-sig.
PRDM16.DT	170.309	0.721381	0.215723	3.34402	0.000825736	0.0194658	Not-sig.
PRDM16	618.171	0.0090912	0.132918	0.0683971	0.94547	0.987086	Not-sig.
ARHGEF16	177.348	0.140838	0.178155	0.790535	0.429215	0.7684	Not-sig.
MEGF6	868.38	0.28599	0.135618	2.1088	0.034962	0.22901	Not-sig.
ENSG00000291156	17.1137	0.00251277	0.614776	0.0040873	0.996739	0.998622	Not-sig.
TPRG1L	824.538	0.260206	0.0968519	2.68663	0.00721758	0.0848922	Not-sig.
WRAP73	373.744	-0.176528	0.140107	-1.25996	0.207685	0.575737	Not-sig.
TP73	15.2388	0.0760552	0.608036	0.125083	0.900458	0.975558	Not-sig.
GFOD3P	395.404	0.0692545	0.13655	0.507172	0.612034	0.872715	Not-sig.
CCDC27	11.8348	-0.00420535	0.682506	-0.00616163	0.995084	0.997941	Not-sig.
SMIM1	28.3461	0.816136	0.43186	1.88982	0.0587825	0.308803	Not-sig.
LRRC47	972.35	0.178304	0.0964694	1.84829	0.0645599	0.323852	Not-sig.
CEP104	503.915	-0.208218	0.124774	-1.66876	0.0951645	0.400555	Not-sig.
DFFB	60.3819	-0.54693	0.315202	-1.73517	0.0827099	0.371627	Not-sig.
C1orf174	324.183	-0.189119	0.149157	-1.26792	0.204827	0.572016	Not-sig.
AJAP1	11.5111	2.84826	0.818925	3.47806	0.000505066	0.0136759	Up
NPHP4	314.45	0.39773	0.170271	2.33586	0.0194983	0.158669	Not-sig.
KCNAB2	312.372	-0.214954	0.163564	-1.31419	0.188783	0.555268	Not-sig.
CHD5	10.4631	0.726354	0.740866	0.980412	0.326883	0.698554	Not-sig.
RPL22	3390.28	-0.124505	0.0782564	-1.59099	0.111613	0.434144	Not-sig.
RNF207	11.5821	0.307704	0.683543	0.45016	0.652595	0.892249	Not-sig.
ICMT	1488	0.016312	0.0937715	0.173954	0.861901	0.963597	Not-sig.
HES3	13.1715	1.75755	0.692148	2.53927	0.0111084	0.111191	Not-sig.
GPR153	805.783	0.460402	0.150577	3.05758	0.0022313	0.0382153	Not-sig.
ACOT7	745.823	-0.246096	0.119927	-2.05205	0.0401647	0.249573	Not-sig.
ESPN	126.84	0.238077	0.217019	1.09703	0.272627	0.653116	Not-sig.
TNFRSF25	109.142	-0.0567219	0.464651	-0.122074	0.90284	0.975977	Not-sig.
PLEKHG5	528.566	-0.0648734	0.129143	-0.502336	0.615431	0.8745	Not-sig.
NOL9	251.83	0.169511	0.168853	1.0039	0.315428	0.687602	Not-sig.
ZBTB48	252.118	0.00810727	0.153823	0.0527052	0.957967	0.991014	Not-sig.
KLHL21	363.846	0.473402	0.13844	3.41954	0.000627262	0.0159679	Not-sig.
PHF13	1427.69	0.0608194	0.0810185	0.750685	0.452842	0.78573	Not-sig.
THAP3	263.146	-0.337878	0.168401	-2.00639	0.0448142	0.265809	Not-sig.
DNAJC11	565.928	0.0403509	0.111184	0.362921	0.716664	0.918983	Not-sig.
CAMTA1.DT	14.6527	0.788595	0.688531	1.14533	0.252072	0.632069	Not-sig.
CAMTA1	980.764	0.134598	0.0971954	1.38482	0.166107	0.523938	Not-sig.
ENSG00000169972	8.70391	-0.585774	0.839082	-0.698112	0.485107	0.804501	Not-sig.
VAMP3	577.562	-0.0162717	0.117307	-0.138711	0.889679	0.971906	Not-sig.
PER3	316.178	-0.2248	0.162251	-1.38551	0.165897	0.523938	Not-sig.
PARK7	2403.76	0.0195773	0.0866686	0.225887	0.821289	0.952931	Not-sig.
ERRFI1	1187.13	-0.310886	0.0944124	-3.29286	0.000991753	0.0218226	Not-sig.
SLC45A1	26.1095	-0.0808494	0.484716	-0.166798	0.867529	0.964758	Not-sig.
RERE	1849.4	0.0162257	0.0890807	0.182146	0.855468	0.962275	Not-sig.
ENO1	27824.1	0.079905	0.0927244	0.861747	0.388827	0.741955	Not-sig.
GPR157	86.9995	0.280853	0.272049	1.03236	0.301902	0.677133	Not-sig.
MIR34AHG	39.622	-1.21086	0.469776	-2.57752	0.0099513	0.103065	Not-sig.
H6PD	1432.63	-0.013873	0.106913	-0.12976	0.896756	0.974959	Not-sig.
SPSB1	167.299	0.0854435	0.197026	0.433667	0.66453	0.898174	Not-sig.
SLC25A33	198.638	0.0120248	0.206684	0.0581798	0.953605	0.989639	Not-sig.
TMEM201	352.511	0.0346224	0.1406	0.246248	0.805491	0.947586	Not-sig.
PIK3CD	494.238	-0.0227986	0.145671	-0.156507	0.875633	0.966681	Not-sig.
PIK3CD.AS2	51.4547	0.490002	0.362546	1.35156	0.176517	0.538595	Not-sig.
CLSTN1	7681.62	-0.00454457	0.0666927	-0.0681419	0.945673	0.987086	Not-sig.
CTNNBIP1	4006.47	0.0588417	0.0702896	0.837132	0.402518	0.751635	Not-sig.
LZIC	816.469	-0.0050497	0.107136	-0.0471337	0.962407	0.991468	Not-sig.
NMNAT1	203.317	-0.029405	0.171962	-0.170997	0.864226	0.963773	Not-sig.
UBE4B	2148.67	0.0364443	0.0901471	0.404276	0.68601	0.907516	Not-sig.
KIF1B	3226.6	0.0521605	0.107711	0.484263	0.628199	0.880962	Not-sig.
ENSG00000274481	9.43923	0.00948656	0.785899	0.012071	0.990369	0.996981	Not-sig.
PGD	5567.69	0.153348	0.0666429	2.30104	0.0213896	0.168272	Not-sig.
CENPS	13.2847	0.693764	0.615857	1.1265	0.259953	0.639795	Not-sig.
DFFA	1810.3	0.0860669	0.0800273	1.07547	0.282164	0.660006	Not-sig.
PEX14	602.669	-0.029829	0.106793	-0.279317	0.780002	0.93851	Not-sig.
CASZ1	319.052	0.267837	0.145412	1.84192	0.0654867	0.325844	Not-sig.
ENSG00000197530	18.4072	-0.576748	0.545346	-1.05758	0.290246	0.665685	Not-sig.
C1orf127	9.27475	-0.745611	0.78812	-0.946064	0.344116	0.711575	Not-sig.
TARDBP	3077.14	0.0204285	0.0824915	0.247644	0.80441	0.947534	Not-sig.
MASP2	43.0951	-0.61733	0.415848	-1.48451	0.137674	0.481125	Not-sig.
SRM	670.416	-0.00850978	0.114669	-0.0742117	0.940842	0.985571	Not-sig.
EXOSC10	695.735	0.00169074	0.108123	0.0156372	0.987524	0.99623	Not-sig.
MTOR	1865.28	0.0167496	0.103412	0.16197	0.87133	0.965841	Not-sig.
UBIAD1	368.025	0.148212	0.139158	1.06506	0.286849	0.663309	Not-sig.
DISP3	106.964	0.0311879	0.238359	0.130845	0.895898	0.974781	Not-sig.
FBXO2	537.42	0.31895	0.12168	2.62121	0.00876178	0.0954364	Not-sig.
FBXO44	377.948	0.399392	0.179537	2.22456	0.0261106	0.191412	Not-sig.
MAD2L2	1435.59	0.086338	0.101935	0.846991	0.397	0.748267	Not-sig.
FBXO6	19.559	-0.22088	0.581017	-0.380161	0.703826	0.913877	Not-sig.
DRAXIN	1486.33	0.3709	0.0863475	4.29544	1.74346e-05	0.00108123	Not-sig.
AGTRAP	381.09	0.214901	0.156925	1.36945	0.170859	0.529583	Not-sig.
MTHFR	235.173	0.452416	0.184428	2.45308	0.014164	0.128825	Not-sig.
CLCN6	714.744	0.120026	0.117367	1.02265	0.306471	0.679462	Not-sig.
NPPB	10.2947	0.770515	1.08289	0.711536	0.476752	0.799003	Not-sig.
KIAA2013	1245.11	0.141829	0.0926992	1.52999	0.12602	0.461609	Not-sig.
PLOD1	2527	0.0988141	0.0841848	1.17378	0.240485	0.617059	Not-sig.
MFN2	1504.6	0.00395608	0.0823661	0.0480304	0.961692	0.991076	Not-sig.
MIIP	672.818	0.0101612	0.112502	0.0903202	0.928033	0.982282	Not-sig.
VPS13D	430.859	0.117053	0.175995	0.665095	0.50599	0.815993	Not-sig.
PDPN	219.615	-0.23499	0.202486	-1.16052	0.245837	0.62484	Not-sig.
PRDM2	859.765	-0.159746	0.103845	-1.53831	0.123973	0.45801	Not-sig.
KAZN	435.343	-0.00293741	0.140869	-0.020852	0.983364	0.995851	Not-sig.
TMEM51	147.415	0.188293	0.20496	0.918685	0.35826	0.723008	Not-sig.
FHAD1	44.1618	0.792791	0.363614	2.18031	0.0292345	0.205319	Not-sig.
EFHD2	379.396	0.282945	0.133908	2.11299	0.0346019	0.227523	Not-sig.
CASP9	211.317	0.287094	0.199051	1.44231	0.149214	0.499423	Not-sig.
DNAJC16	457.603	-0.0569119	0.140545	-0.404937	0.685523	0.907501	Not-sig.
AGMAT	9.57076	-0.355111	0.705514	-0.503336	0.614728	0.874421	Not-sig.
DDI2	857.77	-0.0237988	0.112068	-0.21236	0.831826	0.956325	Not-sig.
PLEKHM2	1311.67	-0.0389314	0.0879761	-0.442522	0.658111	0.895167	Not-sig.
FBLIM1	586.092	0.327272	0.113141	2.89261	0.00382053	0.0546095	Not-sig.
UQCRHL	127.781	-0.167915	0.205269	-0.818027	0.413342	0.757841	Not-sig.
SPEN.AS1	242.851	-0.170322	0.184507	-0.923118	0.355946	0.721483	Not-sig.
SPEN	2449.3	-0.0610293	0.120569	-0.506176	0.612733	0.873147	Not-sig.
ZBTB17	473.835	-0.265994	0.116977	-2.27391	0.0229713	0.176561	Not-sig.
CLCNKB	51.0962	-0.657422	0.351175	-1.87207	0.0611975	0.315173	Not-sig.
FAM131C	25.1034	-0.859242	0.496439	-1.73081	0.0834857	0.373513	Not-sig.
EPHA2	805.945	-0.471935	0.125534	-3.75941	0.000170312	0.00610581	Not-sig.
ARHGEF19	727.035	-0.917345	0.174427	-5.2592	1.44682e-07	2.79578e-05	Not-sig.
ENSG00000157916	71.2732	0.24942	0.277115	0.900059	0.368089	0.729725	Not-sig.
CPLANE2	85.0354	0.125824	0.268796	0.468101	0.639712	0.886118	Not-sig.
FBXO42	546.759	-0.0096347	0.113408	-0.0849558	0.932297	0.983519	Not-sig.
SZRD1	1762.52	-0.0344614	0.0829512	-0.415442	0.677818	0.9049	Not-sig.
NECAP2	464.526	0.0293511	0.12046	0.243659	0.807495	0.948254	Not-sig.
CROCCP3	30.6999	0.00260234	0.446066	0.00583398	0.995345	0.997941	Not-sig.
LINC01783	9.69634	-0.951691	0.76652	-1.24157	0.214394	0.583917	Not-sig.
NBPF1	413.533	0.247618	0.155454	1.59286	0.111191	0.433379	Not-sig.
ENSG00000157881	218.824	-0.00468852	0.196856	-0.023817	0.980999	0.995688	Not-sig.
MST1P2	75.3042	-0.2936	0.319155	-0.919929	0.35761	0.722833	Not-sig.
CROCC	1215.9	0.136115	0.114702	1.18668	0.235355	0.609386	Not-sig.
ENSG00000142606	11.8115	-0.93545	0.702606	-1.3314	0.183057	0.547687	Not-sig.
ENSG00000215912	64.839	0.0010625	0.32469	0.00327235	0.997389	0.999013	Not-sig.
ENSG00000285945	35.1596	-0.123712	0.40788	-0.303304	0.761658	0.9333	Not-sig.
MFAP2	1708.73	-0.144546	0.1096	-1.31885	0.187219	0.553155	Not-sig.
ATP13A2	1001.89	-0.0319358	0.103727	-0.307883	0.758171	0.933078	Not-sig.
SDHB	387.765	-0.281302	0.159296	-1.7659	0.0774122	0.35743	Not-sig.
PADI2	117.86	1.3377	0.266278	5.02369	5.06886e-07	7.42392e-05	Up
PADI3	54.1816	-1.20771	0.332095	-3.63665	0.000276207	0.00894331	Down
RCC2	3738.31	-0.271302	0.0813452	-3.33519	0.00085242	0.019864	Not-sig.
ARHGEF10L	553.223	0.217199	0.125917	1.72493	0.0845393	0.375676	Not-sig.
IGSF21	143.467	-0.0150068	0.215517	-0.0696318	0.944487	0.986835	Not-sig.
KLHDC7A	13.9473	0.587731	0.696401	0.843955	0.398695	0.749298	Not-sig.
PAX7	1689.39	0.381822	0.094273	4.05018	5.11792e-05	0.00242943	Not-sig.
ALDH4A1	736.51	0.0769321	0.101484	0.758069	0.44841	0.781832	Not-sig.
IFFO2	131.227	-0.178643	0.243024	-0.735083	0.462289	0.790112	Not-sig.
UBR4	2349.51	-0.013473	0.235756	-0.0571479	0.954427	0.989958	Not-sig.
EMC1.AS1	8.80614	-1.42374	0.873251	-1.63039	0.10302	0.4185	Not-sig.
EMC1	1726.74	0.0675702	0.0814635	0.829454	0.406848	0.754652	Not-sig.
MRTO4	552.328	-0.124366	0.123768	-1.00483	0.314977	0.687473	Not-sig.
ENSG00000130762	14.2906	-0.106906	0.609804	-0.175312	0.860835	0.963373	Not-sig.
AKR7A2	735.435	0.13253	0.106714	1.24192	0.214265	0.583669	Not-sig.
SLC66A1	182.268	0.279143	0.193384	1.44346	0.14889	0.498848	Not-sig.
CAPZB	3764.44	0.0108561	0.0819062	0.132543	0.894555	0.974073	Not-sig.
MICOS10	52.2914	0.261743	0.337621	0.775259	0.438187	0.774632	Not-sig.
NBL1	205.578	-0.654081	0.200322	-3.26514	0.00109409	0.0233386	Not-sig.
TMCO4	13.415	-1.76257	0.746073	-2.36247	0.0181538	0.151464	Not-sig.
OTUD3	637.915	-0.175911	0.124419	-1.41387	0.157401	0.511917	Not-sig.
UBXN10	30.1056	0.878476	0.513011	1.71239	0.0868241	0.381094	Not-sig.
CAMK2N1	470.504	0.213057	0.127791	1.66723	0.0954684	0.400826	Not-sig.
MUL1	432.402	-0.0028559	0.131138	-0.0217779	0.982625	0.995793	Not-sig.
FAM43B	16.4167	0.249779	0.661004	0.377878	0.705521	0.9143	Not-sig.
CDA	67.8735	0.0272133	0.35389	0.0768976	0.938705	0.985132	Not-sig.
PINK1	294.403	0.0685497	0.168284	0.407346	0.683754	0.906798	Not-sig.
PINK1.AS	38.321	0.13593	0.370666	0.366717	0.71383	0.917799	Not-sig.
DDOST	4349.72	-0.0368461	0.0613741	-0.600353	0.548271	0.840384	Not-sig.
KIF17	194.991	-0.398812	0.19573	-2.03756	0.041594	0.253448	Not-sig.
SH2D5	139.126	0.046142	0.2277	0.202644	0.839414	0.958297	Not-sig.
HP1BP3	2060.18	-0.0546955	0.10267	-0.532731	0.59422	0.864708	Not-sig.
EIF4G3	2559.04	0.0581949	0.0943509	0.616792	0.537372	0.834537	Not-sig.
ECE1	1378.95	0.212393	0.0988735	2.14812	0.0317039	0.216233	Not-sig.
NBPF2P	14.7662	0.48082	0.606289	0.793055	0.427746	0.767964	Not-sig.
NBPF3	133.836	0.205893	0.208889	0.98566	0.3243	0.695787	Not-sig.
ALPL	2889.61	-0.294408	0.08073	-3.64683	0.000265496	0.00870645	Not-sig.
RAP1GAP	208.987	-0.0208821	0.189516	-0.110186	0.912262	0.978628	Not-sig.
USP48	759.443	0.059792	0.105307	0.567786	0.570181	0.854436	Not-sig.
HSPG2	2212.49	0.0911667	0.191426	0.47625	0.633896	0.883257	Not-sig.
LINC00339	19.9571	-0.331102	0.545064	-0.607456	0.543548	0.837905	Not-sig.
CDC42	23.474	-0.293949	0.467786	-0.628384	0.529753	0.831218	Not-sig.
ZBTB40	451.604	-0.0511624	0.120563	-0.424362	0.671302	0.901477	Not-sig.
EPHA8	18.6594	0.417279	0.564464	0.739248	0.459756	0.789184	Not-sig.
EPHB2	2011	0.782897	0.130376	6.00493	1.9142e-09	9.00468e-07	Not-sig.
KDM1A	6418.97	-0.201327	0.0695309	-2.89551	0.00378548	0.0543103	Not-sig.
LUZP1	1736.01	-0.251433	0.0934083	-2.69176	0.00710763	0.0839595	Not-sig.
HTR1D	56.4664	-0.0785124	0.32504	-0.241547	0.809131	0.949165	Not-sig.
LINC01355	54.427	-0.0122681	0.347002	-0.0353545	0.971797	0.994053	Not-sig.
HNRNPR	4331.72	-0.0357637	0.0952422	-0.375503	0.707287	0.915123	Not-sig.
ZNF436	217.615	0.304305	0.181895	1.67297	0.0943329	0.398492	Not-sig.
ZNF436.AS1	142.697	0.0861224	0.283213	0.304091	0.761058	0.9333	Not-sig.
ASAP3	240.14	0.460744	0.191007	2.41219	0.0158572	0.139044	Not-sig.
E2F2	31.3673	-0.466041	0.443222	-1.05149	0.293036	0.667786	Not-sig.
ID3	610.36	0.294042	0.122755	2.39535	0.0166044	0.143309	Not-sig.
RPL11	19727.8	-0.0902891	0.0913231	-0.988678	0.322821	0.695024	Not-sig.
ELOA.AS1	24.943	-0.155518	0.482774	-0.322133	0.747352	0.930665	Not-sig.
ELOA	669.872	0.00353226	0.101697	0.0347334	0.972292	0.994053	Not-sig.
PITHD1	795.79	0.0436279	0.107511	0.405801	0.684889	0.906848	Not-sig.
LYPLA2	1430.84	0.220079	0.0850963	2.58624	0.00970302	0.101312	Not-sig.
GALE	154.304	0.218718	0.196793	1.11141	0.266393	0.64656	Not-sig.
HMGCL	436.223	0.175231	0.13428	1.30497	0.191904	0.557494	Not-sig.
FUCA1	162.465	-0.147152	0.201424	-0.730561	0.465047	0.792031	Not-sig.
PNRC2	2087.07	-0.0657066	0.0793495	-0.828065	0.407634	0.754652	Not-sig.
SRSF10	1643.03	-0.0467673	0.0915698	-0.510729	0.609541	0.871501	Not-sig.
MYOM3	21.3548	0.102831	0.539762	0.190512	0.848908	0.96086	Not-sig.
IFNLR1	78.8393	-0.415998	0.269521	-1.54347	0.122716	0.456557	Not-sig.
GRHL3	1256.93	-0.514085	0.140427	-3.66087	0.000251363	0.0083498	Not-sig.
STPG1	353.39	-0.242016	0.149736	-1.61629	0.106032	0.424237	Not-sig.
NIPAL3	407.183	-0.224012	0.122446	-1.82947	0.0673288	0.331844	Not-sig.
RCAN3	369.173	-0.0272198	0.15594	-0.174553	0.861431	0.963479	Not-sig.
SRRM1	2198.86	-0.0669537	0.0877207	-0.76326	0.445308	0.779838	Not-sig.
CLIC4	4845.38	-0.0797444	0.0940512	-0.847883	0.396503	0.747869	Not-sig.
SYF2	949.83	0.0507266	0.103223	0.491427	0.623125	0.878101	Not-sig.
ENSG00000131697	13.0949	-0.78671	0.718909	-1.09431	0.273819	0.653825	Not-sig.
RSRP1	593.546	-0.0233055	0.165377	-0.140924	0.88793	0.971532	Not-sig.
TMEM50A	1640.04	-0.0784482	0.0820146	-0.956516	0.338812	0.707526	Not-sig.
RHCE	13.2663	-0.194646	0.675156	-0.288297	0.773119	0.93789	Not-sig.
MACO1	350.915	0.174607	0.147799	1.18138	0.237452	0.612342	Not-sig.
LDLRAP1	269.277	0.292498	0.176912	1.65336	0.0982579	0.408078	Not-sig.
MAN1C1	271.714	0.490773	0.158321	3.09986	0.0019361	0.034109	Not-sig.
SELENON	2573.56	-0.0432203	0.0797508	-0.541942	0.587859	0.861168	Not-sig.
MTFR1L	326.845	0.102797	0.145511	0.706454	0.479906	0.800668	Not-sig.
AUNIP	72.398	-0.18872	0.292665	-0.644832	0.519036	0.82569	Not-sig.
PAQR7	57.751	0.57133	0.324262	1.76194	0.0780797	0.359433	Not-sig.
STMN1	8358.45	-0.161938	0.084114	-1.92522	0.0542022	0.29418	Not-sig.
PAFAH2	370.939	0.0846894	0.13288	0.637336	0.523906	0.828709	Not-sig.
EXTL1	32.0932	0.247319	0.452467	0.546601	0.584653	0.860164	Not-sig.
PDIK1L	133.581	-0.226892	0.211942	-1.07053	0.284379	0.661395	Not-sig.
FAM110D	12.5716	0.294107	0.639586	0.45984	0.645631	0.888797	Not-sig.
ZNF593OS	13.4257	-0.612803	0.757538	-0.808941	0.418549	0.760765	Not-sig.
CNKSR1	356.885	-0.0780418	0.141371	-0.552036	0.580924	0.858418	Not-sig.
CEP85	757.107	-0.216353	0.0988418	-2.18888	0.0286056	0.202788	Not-sig.
SH3BGRL3	849.61	0.292311	0.103924	2.81275	0.00491201	0.0655787	Not-sig.
UBXN11	259.992	0.171189	0.170232	1.00562	0.314599	0.687096	Not-sig.
CRYBG2	116.76	-0.247381	0.229941	-1.07584	0.281997	0.659894	Not-sig.
LIN28A	15686.1	0.0958683	0.0711762	1.34691	0.178008	0.539885	Not-sig.
DHDDS	506.128	-0.0118929	0.132463	-0.0897831	0.92846	0.982282	Not-sig.
HMGN2	4952.9	-0.158747	0.0699395	-2.26978	0.0232212	0.177682	Not-sig.
RPS6KA1	513.071	-0.00503891	0.127077	-0.0396523	0.96837	0.993419	Not-sig.
ARID1A	4229.05	0.0694006	0.0959981	0.722937	0.469718	0.794822	Not-sig.
PIGV	311.17	0.0094026	0.144132	0.0652362	0.947986	0.988088	Not-sig.
ZDHHC18	1309.54	-0.0550402	0.0765613	-0.718904	0.4722	0.796166	Not-sig.
SFN	15.2502	-1.31397	0.757356	-1.73495	0.0827498	0.37167	Not-sig.
GPN2	351.855	0.122611	0.137375	0.892532	0.372108	0.731273	Not-sig.
GPATCH3	206.656	0.280281	0.166018	1.68826	0.0913614	0.391731	Not-sig.
NUDC	1492.62	0.0821209	0.0996601	0.82401	0.409934	0.756241	Not-sig.
KDF1	98.3884	-0.618542	0.302337	-2.04587	0.0407693	0.251209	Not-sig.
TRNP1	25.6441	0.947605	0.472524	2.00541	0.0449192	0.266021	Not-sig.
TENT5B	157.009	0.311462	0.199229	1.56334	0.117972	0.446241	Not-sig.
SLC9A1	579.627	0.218677	0.125314	1.74502	0.0809805	0.366749	Not-sig.
WDTC1	2287.65	0.0657049	0.0800448	0.820851	0.411731	0.756805	Not-sig.
TMEM222	367.16	0.0666972	0.124109	0.53741	0.590985	0.861771	Not-sig.
SYTL1	193.751	0.373127	0.204635	1.82338	0.0682462	0.334448	Not-sig.
MAP3K6	214.024	0.37214	0.18835	1.97579	0.0481781	0.276888	Not-sig.
CD164L2	19.0991	-0.698599	0.592409	-1.17925	0.238298	0.613497	Not-sig.
GPR3	46.2965	-0.0761681	0.334841	-0.227475	0.820054	0.952487	Not-sig.
WASF2	3548.9	-0.0869999	0.0726487	-1.19754	0.231096	0.605185	Not-sig.
AHDC1	2010.97	0.255167	0.099843	2.55568	0.0105979	0.107869	Not-sig.
IFI6	73.0636	0.137195	0.278079	0.493367	0.621753	0.877783	Not-sig.
FAM76A	177.598	-0.436014	0.20202	-2.15828	0.0309064	0.212585	Not-sig.
STX12	431.298	-0.187514	0.127992	-1.46504	0.142911	0.490181	Not-sig.
PPP1R8	886.619	-0.0187014	0.0949713	-0.196916	0.843893	0.959494	Not-sig.
THEMIS2	72.0216	0.00333659	0.304193	0.0109686	0.991248	0.997002	Not-sig.
RPA2	915.903	-0.187886	0.102832	-1.82711	0.0676838	0.332474	Not-sig.
SMPDL3B	49.9521	-0.380045	0.306002	-1.24197	0.214249	0.583669	Not-sig.
XKR8	293.178	0.0239058	0.14776	0.161788	0.871473	0.965906	Not-sig.
EYA3	868.115	-0.254606	0.0971525	-2.62069	0.00877521	0.095515	Not-sig.
DNAJC8	2184.76	-0.0155468	0.0971898	-0.159964	0.87291	0.966201	Not-sig.
ATP5IF1	326.692	-0.0450216	0.172914	-0.26037	0.794579	0.943531	Not-sig.
ENSG00000049247	42.3459	-0.4081	0.420913	-0.96956	0.332266	0.702193	Not-sig.
SESN2	375.387	0.0820341	0.133954	0.612404	0.540271	0.835616	Not-sig.
MED18	307.805	-0.0519682	0.162348	-0.320103	0.74889	0.930903	Not-sig.
PHACTR4	1060.72	-0.0346136	0.0921251	-0.375724	0.707122	0.914991	Not-sig.
RCC1	813.878	-0.103159	0.107536	-0.959298	0.337409	0.706069	Not-sig.
SNHG3	214.58	-0.418734	0.198061	-2.11416	0.0345012	0.22725	Not-sig.
TRNAU1AP	355.132	0.0959076	0.156481	0.612902	0.539941	0.835228	Not-sig.
SNHG12	42.0195	0.514137	0.356071	1.44392	0.148762	0.498668	Not-sig.
TAF12	404.846	-0.0618996	0.12485	-0.495792	0.620041	0.876973	Not-sig.
RAB42	23.8735	-0.0741902	0.483051	-0.153586	0.877936	0.967585	Not-sig.
GMEB1	385.683	-0.15922	0.136214	-1.1689	0.242445	0.619917	Not-sig.
ENSG00000284747	9.95017	1.14862	0.798072	1.43924	0.150083	0.500533	Not-sig.
YTHDF2	1819.31	-0.0664594	0.0864599	-0.768672	0.442088	0.776887	Not-sig.
OPRD1	18.0314	-0.691648	0.534031	-1.29515	0.19527	0.562086	Not-sig.
EPB41	2902.99	-0.120435	0.0914108	-1.31752	0.187666	0.553284	Not-sig.
TMEM200B	151.176	0.0262768	0.252797	0.103945	0.917213	0.980968	Not-sig.
SRSF4	2479.09	-0.154945	0.0810674	-1.91132	0.055964	0.299673	Not-sig.
MECR	399.651	-0.101926	0.128317	-0.794326	0.427006	0.767579	Not-sig.
PTPRU	1206.59	-0.444011	0.113272	-3.91986	8.86015e-05	0.00361465	Not-sig.
SDC3	2492.58	0.216674	0.0740147	2.92744	0.00341765	0.0509726	Not-sig.
PUM1	2923.24	-0.0069795	0.0905383	-0.0770889	0.938553	0.985132	Not-sig.
NKAIN1	655.225	-0.244421	0.137898	-1.77248	0.0763149	0.354492	Not-sig.
SNRNP40	1201.88	-0.14871	0.0966566	-1.53854	0.123918	0.457997	Not-sig.
ZCCHC17	602.819	0.0690448	0.119188	0.579295	0.56239	0.850898	Not-sig.
FABP3	151.472	-0.0441926	0.220489	-0.20043	0.841144	0.958929	Not-sig.
SERINC2	714.385	-0.0315655	0.103308	-0.305548	0.759948	0.9333	Not-sig.
TINAGL1	81.3475	-1.26855	0.558663	-2.27069	0.023166	0.177399	Not-sig.
PEF1	549.556	-0.0493538	0.1275	-0.387088	0.698691	0.911178	Not-sig.
COL16A1	296.263	0.315868	0.186678	1.69205	0.0906367	0.390146	Not-sig.
ADGRB2	1248.43	0.822774	0.12402	6.63423	3.26208e-11	2.64056e-08	Not-sig.
SPOCD1	61.4278	-0.00353689	0.31095	-0.0113745	0.990925	0.997002	Not-sig.
PTP4A2	2545.66	0.0991857	0.0832109	1.19198	0.233269	0.607008	Not-sig.
KHDRBS1	7203.46	-0.0655891	0.0613553	-1.069	0.285068	0.661465	Not-sig.
TMEM39B	237.554	0.215004	0.158951	1.35264	0.17617	0.538575	Not-sig.
KPNA6	1561.45	-0.15746	0.0880998	-1.78729	0.0738903	0.348354	Not-sig.
TXLNA	969.814	0.0798079	0.0958989	0.832209	0.405291	0.753397	Not-sig.
CCDC28B	168.2	0.279877	0.197051	1.42033	0.155511	0.508846	Not-sig.
IQCC	64.3696	0.0801914	0.296377	0.270573	0.78672	0.941102	Not-sig.
TMEM234	69.2597	0.218667	0.30118	0.726034	0.467818	0.793513	Not-sig.
EIF3I	2882.88	-0.0180641	0.0790917	-0.228395	0.819339	0.952349	Not-sig.
ENSG00000197241	16.4198	0.268757	0.630734	0.426101	0.670034	0.901	Not-sig.
FAM167B	31.5918	0.0925574	0.494686	0.187104	0.851579	0.961573	Not-sig.
LCK	21.262	-0.978726	0.513709	-1.90522	0.056752	0.30241	Not-sig.
HDAC1	2259.39	-0.179105	0.0785698	-2.27956	0.0226338	0.175017	Not-sig.
MARCKSL1	10359	0.218748	0.0782316	2.79617	0.00517127	0.0679779	Not-sig.
FAM229A	48.0644	0.356217	0.392687	0.907126	0.36434	0.728417	Not-sig.
BSDC1	1341.47	0.156651	0.0919047	1.70449	0.0882897	0.384782	Not-sig.
ZBTB8B	79.0465	-0.356088	0.255317	-1.39469	0.163109	0.520338	Not-sig.
ZBTB8A	199.133	-0.147166	0.197402	-0.745516	0.45596	0.788028	Not-sig.
ZBTB8OS	223.669	-0.199087	0.170212	-1.16965	0.242143	0.619462	Not-sig.
RBBP4	4178.01	-0.17388	0.0645001	-2.6958	0.00702196	0.0832032	Not-sig.
NHSL3	950.158	-0.0120474	0.101209	-0.119035	0.905248	0.976895	Not-sig.
YARS1	1166.6	-0.135107	0.0926028	-1.459	0.144566	0.492669	Not-sig.
S100PBP	832.685	-0.0526566	0.109228	-0.482082	0.629748	0.881544	Not-sig.
FNDC5	53.7521	0.535349	0.355787	1.50469	0.132404	0.471382	Not-sig.
HPCA	19.3369	-0.931192	0.649856	-1.43292	0.15188	0.502997	Not-sig.
TMEM54	48.2792	-0.765659	0.37899	-2.02026	0.0433561	0.260361	Not-sig.
RNF19B	274.57	0.0833708	0.152392	0.547082	0.584322	0.860164	Not-sig.
AK2	1023.29	-0.239597	0.107168	-2.23572	0.0253704	0.18841	Not-sig.
AZIN2	46.7158	0.327254	0.353022	0.927006	0.353923	0.719463	Not-sig.
TRIM62	107.496	0.0988516	0.233924	0.422581	0.672601	0.902513	Not-sig.
ZNF362	593.56	-0.00294703	0.118476	-0.0248744	0.980155	0.995584	Not-sig.
ENSG00000231181	14.088	0.118058	0.679756	0.173677	0.862119	0.96375	Not-sig.
PHC2	2698.21	0.0251438	0.0718136	0.350126	0.726244	0.922853	Not-sig.
ZSCAN20	240.795	0.0689168	0.154577	0.445841	0.655712	0.894126	Not-sig.
CSMD2	34.7549	-0.248965	0.40396	-0.61631	0.53769	0.834814	Not-sig.
SMIM12	310.351	0.232179	0.146403	1.58589	0.112764	0.436173	Not-sig.
DLGAP3	57.2645	0.740561	0.359308	2.06108	0.0392957	0.246983	Not-sig.
ENSG00000171603	9.62637	-0.175724	0.790296	-0.222352	0.82404	0.953899	Not-sig.
ZMYM6	114.359	-0.0124996	0.211258	-0.0591676	0.952819	0.98949	Not-sig.
ZMYM1	384.607	-0.218357	0.129128	-1.69102	0.0908337	0.390448	Not-sig.
SFPQ	1891	0.526268	0.260108	2.02327	0.0430455	0.259217	Not-sig.
ZMYM4	2406.03	-0.0964357	0.0875918	-1.10097	0.270911	0.651644	Not-sig.
KIAA0319L	1800.52	0.0228011	0.0745454	0.305869	0.759704	0.9333	Not-sig.
NCDN	572.949	0.32923	0.111523	2.95213	0.00315588	0.048416	Not-sig.
TFAP2E	15.1855	1.35037	0.673363	2.00542	0.0449185	0.266021	Not-sig.
PSMB2	1386.65	-0.137756	0.0832256	-1.65521	0.0978813	0.407155	Not-sig.
C1orf216	106.238	0.73188	0.252906	2.89389	0.00380507	0.0545047	Not-sig.
CLSPN	247.89	-0.0584671	0.183945	-0.31785	0.750598	0.930903	Not-sig.
AGO4	816.224	0.101874	0.109608	0.929444	0.352659	0.718486	Not-sig.
AGO1	836.562	0.279175	0.137261	2.03391	0.041961	0.254781	Not-sig.
AGO3	445.204	0.0353285	0.130119	0.271508	0.786	0.940534	Not-sig.
TEKT2	94.222	-0.113793	0.257447	-0.442005	0.658486	0.895167	Not-sig.
ADPRS	424.331	0.111423	0.128736	0.865521	0.386753	0.740294	Not-sig.
TRAPPC3	709.328	-0.072321	0.11321	-0.638822	0.522939	0.828185	Not-sig.
MAP7D1	2345.81	0.136588	0.0695644	1.96348	0.0495905	0.281063	Not-sig.
THRAP3	2314.02	0.00316581	0.0939787	0.0336865	0.973127	0.994053	Not-sig.
SH3D21	529.878	-0.103489	0.165971	-0.623537	0.532932	0.832908	Not-sig.
ENSG00000283611	9.04879	-0.0892622	0.742997	-0.120138	0.904374	0.976432	Not-sig.
STK40	965.634	0.0609821	0.0942821	0.646804	0.517759	0.825344	Not-sig.
LSM10	387.557	0.032542	0.149902	0.217089	0.828139	0.955641	Not-sig.
OSCP1	92.6931	0.410587	0.258504	1.58832	0.112214	0.435163	Not-sig.
MRPS15	677.678	-0.0573399	0.11193	-0.512285	0.608451	0.870672	Not-sig.
ZC3H12A	145.541	0.0526176	0.222051	0.236961	0.812687	0.95072	Not-sig.
MEAF6	925.8	-0.00666201	0.0912968	-0.0729709	0.941829	0.985799	Not-sig.
SNIP1	343.902	0.0564316	0.141727	0.398171	0.690504	0.908632	Not-sig.
DNALI1	716.619	-0.15688	0.123961	-1.26557	0.205668	0.573063	Not-sig.
GNL2	1069.03	-0.102605	0.0953418	-1.07618	0.281848	0.65984	Not-sig.
RSPO1	89.0845	2.00588	0.565825	3.54505	0.000392536	0.0115214	Up
AIRIM	404.322	-0.125743	0.135452	-0.928323	0.35324	0.718913	Not-sig.
CDCA8	763.159	-0.490074	0.125931	-3.8916	9.95871e-05	0.00397831	Not-sig.
EPHA10	14.4358	-0.173469	0.617702	-0.28083	0.778841	0.93851	Not-sig.
MANEAL	9.10266	0.0927724	0.797513	0.116327	0.907393	0.977633	Not-sig.
YRDC	187.808	-0.34112	0.184371	-1.85019	0.0642868	0.32315	Not-sig.
C1orf122	355.187	0.442419	0.143361	3.08604	0.0020284	0.0353809	Not-sig.
MTF1	282.965	0.0479757	0.163086	0.294175	0.768624	0.935896	Not-sig.
INPP5B	389.756	-0.197236	0.124977	-1.57818	0.114525	0.439903	Not-sig.
SF3A3	2066.79	-0.0771593	0.085838	-0.898895	0.368709	0.730167	Not-sig.
FHL3	403.243	-0.0544204	0.125512	-0.433587	0.664588	0.898174	Not-sig.
UTP11	499.842	-0.179161	0.121407	-1.47571	0.140022	0.485561	Not-sig.
POU3F1	867.543	0.355962	0.119481	2.97923	0.00288972	0.0456771	Not-sig.
RRAGC	211.701	0.0805249	0.173312	0.464625	0.6422	0.887034	Not-sig.
MYCBP	268.208	-0.395283	0.148494	-2.66194	0.0077692	0.0891719	Not-sig.
AKIRIN1	2697.56	0.158757	0.071008	2.23576	0.0253676	0.18841	Not-sig.
NDUFS5	1807.01	-0.0229287	0.122304	-0.187472	0.85129	0.961573	Not-sig.
MACF1	2860.91	0.107388	0.233179	0.460538	0.64513	0.88852	Not-sig.
BMP8A	14.7014	-0.322501	0.654702	-0.492593	0.6223	0.878101	Not-sig.
PPIEL	78.7657	-0.0476807	0.292494	-0.163014	0.870507	0.965486	Not-sig.
PABPC4	1992.5	0.0354139	0.0837156	0.423026	0.672277	0.902314	Not-sig.
HEYL	199.272	-0.137401	0.216205	-0.635512	0.525094	0.829233	Not-sig.
PPIE	838.754	-0.187435	0.111194	-1.68565	0.091863	0.392484	Not-sig.
TRIT1	413.734	-0.144473	0.12216	-1.18265	0.236946	0.611679	Not-sig.
MYCL	456.332	-0.73951	0.173316	-4.26683	1.98267e-05	0.00121006	Not-sig.
CAP1	3533.31	0.0638508	0.0637178	1.00209	0.316301	0.688176	Not-sig.
PPT1	2584.37	-0.119748	0.0811031	-1.47649	0.139814	0.485096	Not-sig.
RLF	985.673	0.0182776	0.116399	0.157025	0.875225	0.966681	Not-sig.
ZMPSTE24.DT	178.003	-0.128255	0.180348	-0.711152	0.47699	0.799109	Not-sig.
ZMPSTE24	475.836	0.21701	0.137424	1.57912	0.114308	0.439622	Not-sig.
COL9A2	484.314	0.0322627	0.15699	0.205507	0.837176	0.95811	Not-sig.
SMAP2	234.83	0.0980169	0.160367	0.611203	0.541065	0.835982	Not-sig.
ZFP69B	132.557	-0.451908	0.212433	-2.12729	0.0333957	0.223183	Not-sig.
ENSG00000009724	113.927	-0.21592	0.214041	-1.00878	0.31308	0.68602	Not-sig.
ZFP69	84.6417	-0.098063	0.261482	-0.375028	0.70764	0.915349	Not-sig.
EXO5.DT	8.7986	-0.228847	0.810628	-0.282308	0.777707	0.938456	Not-sig.
EXO5	56.287	-0.0784884	0.314268	-0.24975	0.802781	0.947102	Not-sig.
ZNF684	44.6715	0.0568692	0.345451	0.164623	0.869241	0.965117	Not-sig.
RIMS3	904.391	-0.136282	0.107407	-1.26884	0.204499	0.572016	Not-sig.
NFYC.AS1	19.1325	-0.872942	0.600671	-1.45328	0.146146	0.494116	Not-sig.
NFYC	668.255	0.0214615	0.105529	0.203371	0.838845	0.95811	Not-sig.
KCNQ4	48.4533	-0.242166	0.38012	-0.637077	0.524075	0.828709	Not-sig.
CITED4	183.41	-0.288649	0.199045	-1.45017	0.147012	0.495188	Not-sig.
CTPS1	1238.36	-0.183674	0.0866676	-2.11929	0.034066	0.225639	Not-sig.
SCMH1	362.458	-0.243471	0.139199	-1.74908	0.080277	0.364751	Not-sig.
ENSG00000284646	11.4452	-0.121046	0.712794	-0.169819	0.865152	0.963857	Not-sig.
FOXO6	124.6	0.55434	0.227444	2.43725	0.0147993	0.132641	Not-sig.
HIVEP3	18.1012	-0.164027	0.552997	-0.296615	0.766761	0.934745	Not-sig.
FOXJ3	975.859	-0.180535	0.0993327	-1.81748	0.0691434	0.336314	Not-sig.
RIMKLA	47.7668	0.473241	0.413817	1.1436	0.252789	0.63259	Not-sig.
ZMYND12	19.349	0.218893	0.524441	0.417384	0.676397	0.904038	Not-sig.
PPCS	418.954	0.03154	0.133415	0.236405	0.813118	0.95108	Not-sig.
CCDC30	72.4424	0.430899	0.288778	1.49215	0.135661	0.477553	Not-sig.
PPIH	248.877	-0.122448	0.18772	-0.65229	0.514214	0.8233	Not-sig.
ENSG00000162490	15.9052	0.266847	0.586456	0.455016	0.649098	0.890747	Not-sig.
YBX1	19962	-0.191239	0.0900578	-2.12352	0.0337105	0.22425	Not-sig.
CLDN19	19.8457	1.20057	0.505878	2.37324	0.0176327	0.148597	Not-sig.
P3H1	1129.41	-0.115853	0.0908388	-1.27537	0.202178	0.569788	Not-sig.
C1orf50	64.77	0.352072	0.311394	1.13063	0.258209	0.638142	Not-sig.
TMEM269	17.3493	-0.373115	0.619305	-0.602474	0.546859	0.839809	Not-sig.
SVBP	279.7	0.169111	0.156028	1.08385	0.27843	0.65709	Not-sig.
ERMAP	48.9514	0.99154	0.375753	2.63881	0.00831971	0.0931489	Not-sig.
ZNF691	240.574	0.26443	0.167381	1.57982	0.114149	0.439343	Not-sig.
SLC2A1	9397.71	0.108354	0.233067	0.464906	0.641999	0.886908	Not-sig.
SLC2A1.DT	49.4032	0.663126	0.394962	1.67896	0.0931592	0.39547	Not-sig.
CFAP144	18.8162	1.18552	0.633247	1.87213	0.0611886	0.315173	Not-sig.
EBNA1BP2	380.399	0.236209	0.127223	1.85665	0.0633617	0.320877	Not-sig.
TMEM125	53.9905	-0.0906369	0.378089	-0.239724	0.810544	0.949766	Not-sig.
TIE1	23.8894	-0.222874	0.503962	-0.442244	0.658312	0.895167	Not-sig.
CDC20	1527.64	-0.610469	0.144612	-4.22144	2.42745e-05	0.00140884	Not-sig.
ELOVL1	117.483	0.0168081	0.224814	0.0747643	0.940402	0.985446	Not-sig.
MED8	165.523	0.0139406	0.19168	0.0727284	0.942022	0.985817	Not-sig.
SZT2	314.367	0.184717	0.1633	1.13116	0.257989	0.637819	Not-sig.
PTPRF	11260.2	-0.174918	0.0980229	-1.78446	0.0743482	0.348833	Not-sig.
KDM4A	693.284	0.0660242	0.108679	0.607516	0.543508	0.837905	Not-sig.
KDM4A.AS1	13.2002	0.170947	0.660702	0.258735	0.79584	0.944093	Not-sig.
ST3GAL3	33.2345	0.01566	0.401738	0.0389806	0.968906	0.993419	Not-sig.
ARTN	24.2034	-0.854195	0.466094	-1.83267	0.0668524	0.330768	Not-sig.
IPO13	366.545	0.240193	0.149062	1.61137	0.107099	0.425849	Not-sig.
DPH2	272.179	-0.110909	0.157804	-0.702828	0.482163	0.802626	Not-sig.
ATP6V0B	806.152	0.00889044	0.119262	0.0745453	0.940577	0.985454	Not-sig.
B4GALT2	1357.62	-0.0389479	0.0986519	-0.394802	0.692989	0.908959	Not-sig.
CCDC24	140.643	0.0951499	0.249069	0.382022	0.702445	0.913323	Not-sig.
SLC6A9	160.357	0.0383234	0.222739	0.172055	0.863394	0.96375	Not-sig.
ENSG00000199347	21.763	-0.19377	0.543871	-0.356279	0.721632	0.921589	Not-sig.
DMAP1	580.167	0.0707269	0.122461	0.577549	0.563569	0.851772	Not-sig.
ERI3	709.676	-0.00506402	0.103071	-0.0491313	0.960815	0.991014	Not-sig.
RNF220	852.432	-0.0501209	0.108594	-0.461542	0.64441	0.887846	Not-sig.
TMEM53	82.1427	0.289693	0.26795	1.08115	0.279633	0.657104	Not-sig.
ARMH1	21.5926	0.638656	0.531584	1.20142	0.229588	0.602983	Not-sig.
KIF2C	1364.08	-0.774095	0.134634	-5.74962	8.94424e-09	3.19913e-06	Not-sig.
RPS8	27119.4	-0.108706	0.0797312	-1.36341	0.172753	0.532986	Not-sig.
BEST4	101.205	-0.0233458	0.250381	-0.0932413	0.925712	0.982282	Not-sig.
PLK3	80.3869	0.609505	0.287832	2.11757	0.0342114	0.226	Not-sig.
BTBD19	12.5806	1.085	0.744485	1.45739	0.14501	0.493417	Not-sig.
EIF2B3	404.462	-0.159244	0.139646	-1.14034	0.254143	0.634122	Not-sig.
HECTD3	736.495	0.20131	0.110044	1.82936	0.0673452	0.331844	Not-sig.
UROD	728.61	0.266014	0.112941	2.35534	0.0185058	0.153407	Not-sig.
ZSWIM5	273.4	0.836109	0.195209	4.28315	1.84266e-05	0.00113361	Not-sig.
LINC01144	14.8123	-0.726625	0.653799	-1.11139	0.266401	0.64656	Not-sig.
HPDL	80.1923	0.500714	0.267019	1.8752	0.0607647	0.313927	Not-sig.
MUTYH	9.37055	-0.607378	0.813742	-0.7464	0.455426	0.787568	Not-sig.
TOE1	63.7348	0.341605	0.296309	1.15287	0.248964	0.627919	Not-sig.
TESK2	120.728	0.0487351	0.227923	0.213823	0.830685	0.955782	Not-sig.
CCDC163	18.5985	-0.549726	0.543238	-1.01194	0.311565	0.684801	Not-sig.
MMACHC	115.061	0.0229362	0.242784	0.0944718	0.924734	0.982282	Not-sig.
PRDX1	2638.9	-0.135209	0.116211	-1.16348	0.244634	0.623479	Not-sig.
AKR1A1	1887.32	-0.41428	0.125489	-3.30132	0.000962315	0.0213879	Not-sig.
ENSG00000243539	9.07879	-0.609768	0.738231	-0.825986	0.408812	0.755803	Not-sig.
NASP	5020.97	-0.109737	0.0874504	-1.25485	0.209533	0.57756	Not-sig.
CCDC17	12.0955	0.431081	0.688633	0.625995	0.531318	0.832034	Not-sig.
GPBP1L1	2225.3	-0.172189	0.0747162	-2.30458	0.0211903	0.167221	Not-sig.
TMEM69	436.179	0.038218	0.126395	0.302371	0.762369	0.9333	Not-sig.
IPP	334.924	-0.0301136	0.148271	-0.203098	0.839059	0.958176	Not-sig.
ENSG00000120949	24.9098	0.299805	0.483858	0.619613	0.535512	0.833626	Not-sig.
MAST2	677.578	0.0884106	0.114475	0.772317	0.439927	0.775456	Not-sig.
PIK3R3	709.603	0.504816	0.174008	2.90111	0.00371839	0.0536984	Not-sig.
POMGNT1	1432.67	-0.107356	0.101221	-1.06061	0.288866	0.663961	Not-sig.
LURAP1	10.1093	0.383453	0.745457	0.514386	0.606982	0.870084	Not-sig.
RAD54L	192.131	-0.354415	0.190649	-1.85899	0.0630289	0.320352	Not-sig.
LRRC41	1569.11	-0.0388705	0.0810706	-0.479465	0.631608	0.882055	Not-sig.
UQCRH	2442.99	-0.04424	0.110704	-0.399626	0.689432	0.908632	Not-sig.
NSUN4	281.434	0.0703493	0.148304	0.474358	0.635245	0.883935	Not-sig.
FAAH	82.8396	0.204853	0.248961	0.822831	0.410604	0.756241	Not-sig.
DMBX1	374.23	1.10221	0.18914	5.82747	5.62741e-09	2.16374e-06	Up
MKNK1	171.779	0.087882	0.205365	0.427931	0.668701	0.900213	Not-sig.
MOB3C	43.7152	0.83731	0.387647	2.15998	0.0307741	0.211983	Not-sig.
ATPAF1	1342.54	-0.0453068	0.079873	-0.567235	0.570554	0.854643	Not-sig.
EFCAB14	1082.91	-0.0182893	0.0894062	-0.204564	0.837912	0.95811	Not-sig.
CYP4X1	65.2031	-0.111779	0.31166	-0.358659	0.71985	0.921141	Not-sig.
STIL	442.343	-0.429261	0.129337	-3.31893	0.000903635	0.0206601	Not-sig.
CMPK1	646.944	-0.0919105	0.102983	-0.892479	0.372136	0.731273	Not-sig.
TRABD2B	139.477	1.30104	0.254258	5.11703	3.10388e-07	4.92142e-05	Up
SPATA6	289.342	0.162887	0.155515	1.0474	0.294914	0.669685	Not-sig.
BEND5	193.987	-0.153407	0.189637	-0.808949	0.418544	0.760765	Not-sig.
ELAVL4	17.178	1.22022	0.671851	1.8162	0.0693392	0.336562	Not-sig.
DMRTA2	72.967	2.00557	0.554846	3.61465	0.000300756	0.00953737	Up
FAF1	935.725	-0.0681673	0.0928261	-0.734355	0.462732	0.790377	Not-sig.
RNF11	2023.18	-0.0164768	0.0848409	-0.194208	0.846013	0.960231	Not-sig.
TTC39A	15.2372	0.140781	0.577715	0.243686	0.807474	0.948254	Not-sig.
EPS15	818.723	-0.0925567	0.110702	-0.836089	0.403105	0.751712	Not-sig.
OSBPL9	1796.17	-0.00109834	0.0855227	-0.0128427	0.989753	0.996663	Not-sig.
NRDC	2398.1	-0.0127269	0.0790593	-0.160979	0.87211	0.966141	Not-sig.
RAB3B	1361.27	0.215757	0.10696	2.01717	0.0436776	0.261589	Not-sig.
TXNDC12	142.506	0.206752	0.205047	1.00832	0.313303	0.68611	Not-sig.
KTI12	26.2135	0.349183	0.4552	0.767097	0.443024	0.777909	Not-sig.
BTF3L4	1875.44	-0.123504	0.0936312	-1.31905	0.187152	0.553155	Not-sig.
ZFYVE9	770.765	0.195103	0.118541	1.64587	0.0997906	0.411011	Not-sig.
CC2D1B	247.774	0.200871	0.179253	1.1206	0.262459	0.641751	Not-sig.
ORC1	366.05	-0.221787	0.177596	-1.24883	0.211727	0.580873	Not-sig.
PRPF38A	1136.55	0.037688	0.089859	0.419412	0.674915	0.903616	Not-sig.
TUT4	1792.84	-0.153936	0.0975761	-1.5776	0.114659	0.439903	Not-sig.
GPX7	276.679	0.0921943	0.158111	0.5831	0.559826	0.849292	Not-sig.
COA7	387.852	-0.0882324	0.129067	-0.683615	0.494219	0.808652	Not-sig.
ZYG11B	1002.85	0.0386273	0.113272	0.341013	0.733094	0.924267	Not-sig.
ZYG11A	12.7325	0.359507	0.694639	0.517546	0.604775	0.869573	Not-sig.
ECHDC2	112.198	-0.0940223	0.247693	-0.379592	0.704248	0.91396	Not-sig.
SCP2	1058.1	0.00588618	0.103878	0.0566645	0.954812	0.990224	Not-sig.
PODN	30.4066	0.415302	0.451934	0.918943	0.358125	0.723008	Not-sig.
CPT2	312.415	0.147176	0.146544	1.00431	0.315228	0.68759	Not-sig.
CZIB	699.423	-0.125176	0.10917	-1.14662	0.251541	0.63183	Not-sig.
MAGOH	553.706	0.0769465	0.14985	0.51349	0.607609	0.870324	Not-sig.
LRP8	454.175	0.697694	0.27304	2.55528	0.0106102	0.107869	Not-sig.
NDC1	1068.12	-0.137163	0.11552	-1.18735	0.235088	0.609311	Not-sig.
YIPF1	577.59	-0.0899181	0.11064	-0.812711	0.416383	0.759491	Not-sig.
IFT25	252.514	0.014671	0.175594	0.0835507	0.933414	0.984172	Not-sig.
LRRC42	854.02	-0.223217	0.109445	-2.03954	0.0413964	0.253051	Not-sig.
TMEM59	1384.71	-0.0973635	0.0880473	-1.10581	0.268809	0.649533	Not-sig.
TCEANC2	282.298	-0.168884	0.141722	-1.19166	0.233396	0.607073	Not-sig.
CYB5RL	226.703	-0.0688214	0.158894	-0.433126	0.664923	0.898174	Not-sig.
MRPL37	985.468	-0.0270538	0.106814	-0.253279	0.800053	0.946233	Not-sig.
SSBP3	3415.37	0.0216831	0.0707896	0.306303	0.759374	0.9333	Not-sig.
ACOT11	13.4524	0.136808	0.629528	0.217318	0.827961	0.955578	Not-sig.
TTC4	17.8111	0.0545977	0.588852	0.0927189	0.926127	0.982282	Not-sig.
PARS2	236.935	-0.0913108	0.155782	-0.586144	0.557778	0.84807	Not-sig.
DHCR24	1419.22	0.287365	0.119987	2.39497	0.0166218	0.143378	Not-sig.
PCSK9	231.715	-0.443256	0.201064	-2.20455	0.0274855	0.197889	Not-sig.
USP24	1163.6	-0.036448	0.115745	-0.3149	0.752838	0.931208	Not-sig.
PLPP3	316.861	0.0645664	0.16346	0.394999	0.692844	0.908959	Not-sig.
PRKAA2	553.943	-0.311482	0.139764	-2.22863	0.0258387	0.190053	Not-sig.
FYB2	11.4181	0.285605	0.667702	0.427743	0.668838	0.900213	Not-sig.
DAB1	81.4424	0.187941	0.298289	0.630064	0.528653	0.830525	Not-sig.
OMA1	59.494	0.0658343	0.30187	0.218088	0.82736	0.955416	Not-sig.
MYSM1	587.807	-0.0806548	0.133213	-0.605455	0.544876	0.838943	Not-sig.
JUN	1260.94	0.808851	0.210478	3.84293	0.000121574	0.00466286	Not-sig.
FGGY	178.754	0.257482	0.186734	1.37887	0.167935	0.525662	Not-sig.
HOOK1	304.888	-0.038308	0.145905	-0.262554	0.792894	0.942701	Not-sig.
LINC01748	38.1612	-0.306557	0.397322	-0.771559	0.440376	0.775971	Not-sig.
NFIA	61.0474	0.0744053	0.328283	0.22665	0.820696	0.952881	Not-sig.
TM2D1	284.556	0.0122128	0.14076	0.0867633	0.93086	0.983082	Not-sig.
PATJ	686.92	-0.203682	0.129981	-1.56702	0.11711	0.444511	Not-sig.
L1TD1	940.582	0.205336	0.135059	1.52034	0.128425	0.465415	Not-sig.
KANK4	15.7711	3.28072	0.748622	4.38235	1.17407e-05	0.000804155	Up
USP1	1392.78	-0.293122	0.0985282	-2.97501	0.00292982	0.0460742	Not-sig.
DOCK7	1238.32	0.0412701	0.103987	0.396879	0.691457	0.908632	Not-sig.
DOCK7.DT	16.4356	0.490919	0.561424	0.874417	0.381891	0.737982	Not-sig.
ATG4C	316.926	-0.148246	0.155704	-0.9521	0.341046	0.709686	Not-sig.
FOXD3.AS1	74.3633	1.88388	0.390448	4.82492	1.40058e-06	0.000158581	Up
FOXD3	96.8631	2.60649	0.539255	4.8335	1.34155e-06	0.000155136	Up
ALG6	401.197	0.0605838	0.145968	0.415048	0.678107	0.904955	Not-sig.
ITGB3BP	417.116	-0.211168	0.14862	-1.42086	0.155358	0.508797	Not-sig.
EFCAB7	181.918	-0.0956368	0.195168	-0.490023	0.624118	0.878359	Not-sig.
PGM1	417.738	0.200834	0.153828	1.30557	0.191699	0.557482	Not-sig.
ROR1	1717.63	0.262187	0.111015	2.36172	0.0181903	0.151553	Not-sig.
CACHD1	1031.9	0.367748	0.138493	2.65536	0.00792248	0.0906871	Not-sig.
RAVER2	490.487	0.0444431	0.126971	0.350027	0.726318	0.922853	Not-sig.
JAK1	249.856	0.409949	0.155997	2.62793	0.00859065	0.0943136	Not-sig.
AK4	786.514	0.324668	0.132585	2.44876	0.0143351	0.129843	Not-sig.
DNAJC6	370.889	0.0388818	0.131748	0.295122	0.767901	0.935322	Not-sig.
LEPROT	549.914	0.280291	0.13765	2.03626	0.0417246	0.253746	Not-sig.
LEPR	464.809	-0.151046	0.143673	-1.05132	0.29311	0.667856	Not-sig.
SGIP1	15.9814	1.00918	0.576717	1.74988	0.0801399	0.364751	Not-sig.
DNAI4	24.2378	0.889277	0.515064	1.72654	0.0842511	0.374616	Not-sig.
MIER1	729.378	-0.00907461	0.117363	-0.0773206	0.938368	0.985132	Not-sig.
SLC35D1	144.635	0.272944	0.214587	1.27195	0.203391	0.571144	Not-sig.
SERBP1	9161.13	-0.0142858	0.0680297	-0.209994	0.833672	0.957032	Not-sig.
GADD45A	1559.6	0.0280074	0.119622	0.234133	0.814882	0.951588	Not-sig.
GNG12	725.35	0.253639	0.133447	1.90068	0.0573446	0.303914	Not-sig.
GNG12.AS1	60.2603	-0.220727	0.311291	-0.70907	0.478281	0.80009	Not-sig.
WLS	8583.44	-0.24205	0.0942342	-2.5686	0.0102112	0.104978	Not-sig.
DEPDC1	685.282	-0.544518	0.116678	-4.66686	3.05838e-06	0.00029064	Not-sig.
ENSG00000224174	35.987	0.359602	0.422083	0.85197	0.39423	0.746432	Not-sig.
LRRC7	13.7636	0.0992742	0.665382	0.149199	0.881397	0.969177	Not-sig.
LRRC40	774.653	-0.156194	0.105093	-1.48625	0.137213	0.480346	Not-sig.
SRSF11	3437.85	-0.063116	0.0693217	-0.91048	0.362569	0.726793	Not-sig.
ANKRD13C	509.58	0.0595024	0.124965	0.476153	0.633966	0.883257	Not-sig.
ANKRD13C.DT	160.319	0.000900959	0.194766	0.00462585	0.996309	0.998517	Not-sig.
CTH	178.503	-0.199833	0.181676	-1.09994	0.271357	0.651984	Not-sig.
ENSG00000271732	9.93471	-1.10856	0.802471	-1.38144	0.167144	0.525022	Not-sig.
ZRANB2	1798.48	-0.160095	0.0773974	-2.06848	0.0385953	0.244378	Not-sig.
ZRANB2.DT	9.5967	0.048634	0.71285	0.0682247	0.945607	0.987086	Not-sig.
NEGR1	64.1244	0.980635	0.291786	3.3608	0.00077717	0.0186662	Not-sig.
LINC02796	10.9998	0.0626465	0.743623	0.084245	0.932862	0.983913	Not-sig.
LRRIQ3	28.2007	-0.465753	0.436733	-1.06645	0.286221	0.662465	Not-sig.
FPGT.TNNI3K	27.4994	-0.572478	0.502787	-1.13861	0.254865	0.634893	Not-sig.
FPGT	143.092	-0.201441	0.210761	-0.955777	0.339185	0.707738	Not-sig.
SLC44A5	180.816	0.157059	0.198509	0.791191	0.428832	0.768073	Not-sig.
ACADM	684.538	0.467881	0.135453	3.4542	0.000551932	0.0145604	Not-sig.
RABGGTB	455.219	0.0895672	0.123664	0.724278	0.468895	0.794142	Not-sig.
ST6GALNAC3	447.384	0.403875	0.153618	2.62908	0.00856154	0.094304	Not-sig.
ST6GALNAC5	892.445	-0.269255	0.134304	-2.00481	0.0449835	0.266186	Not-sig.
PIGK	377.719	0.0225341	0.127122	0.177264	0.859301	0.962997	Not-sig.
RPL17P6	12.2751	0.214712	0.675524	0.317845	0.750602	0.930903	Not-sig.
AK5	11.6483	0.0418632	0.628515	0.0666064	0.946895	0.987646	Not-sig.
ZZZ3	1080.01	-0.0198761	0.0880478	-0.225742	0.821402	0.952931	Not-sig.
USP33	1353.76	0.0527511	0.100325	0.525801	0.599026	0.867602	Not-sig.
MIGA1	265.663	0.116844	0.164799	0.709008	0.478319	0.80009	Not-sig.
NEXN	78.1253	0.467279	0.327997	1.42465	0.15426	0.507612	Not-sig.
FUBP1	3295.41	-0.109172	0.0773431	-1.41153	0.158089	0.51256	Not-sig.
DNAJB4	551.321	-0.097	0.125309	-0.774086	0.43888	0.775056	Not-sig.
ADGRL2	4815.17	-0.176724	0.0904693	-1.95341	0.0507708	0.284339	Not-sig.
TTLL7	267.821	0.0852685	0.171707	0.496593	0.619476	0.87666	Not-sig.
PRKACB.DT	119.325	-0.400844	0.271268	-1.47767	0.139496	0.484411	Not-sig.
PRKACB	568.523	0.15988	0.120016	1.33215	0.18281	0.54754	Not-sig.
SAMD13	33.0883	0.393438	0.396061	0.993377	0.320526	0.691644	Not-sig.
RPF1	502.1	-0.145272	0.123933	-1.17219	0.241122	0.617945	Not-sig.
GNG5	335.581	-0.0467935	0.18705	-0.250166	0.802459	0.947102	Not-sig.
CTBS	83.1821	-0.782643	0.268046	-2.91981	0.00350246	0.0516327	Not-sig.
SSX2IP	529.399	-0.0938605	0.126868	-0.73983	0.459403	0.789053	Not-sig.
LPAR3	215.307	0.327643	0.175295	1.8691	0.0616092	0.315824	Not-sig.
SYDE2	113.096	-0.732595	0.26319	-2.78353	0.00537713	0.0698679	Not-sig.
C1orf52	389.637	-0.0165955	0.128583	-0.129064	0.897307	0.974962	Not-sig.
BCL10	230.281	-0.0567448	0.164398	-0.345167	0.729969	0.923575	Not-sig.
DDAH1	258.043	-0.736069	0.182017	-4.04396	5.25569e-05	0.00247194	Not-sig.
CCN1	249.009	-1.50214	0.333266	-4.50733	6.56494e-06	0.000536059	Down
ZNHIT6	400.416	-0.117639	0.122005	-0.964219	0.334936	0.704457	Not-sig.
ODF2L	309.466	-0.176209	0.138294	-1.27417	0.202605	0.570289	Not-sig.
CLCA4.AS1	8.78628	-0.212187	0.808153	-0.262558	0.792891	0.942701	Not-sig.
SH3GLB1	1339.21	-0.168609	0.0824589	-2.04477	0.0408778	0.251382	Not-sig.
SELENOF	1440.01	-0.110103	0.102517	-1.074	0.282824	0.660706	Not-sig.
HS2ST1	695.819	0.166223	0.111221	1.49453	0.135038	0.476682	Not-sig.
LINC01140	104.413	-0.12363	0.249985	-0.494547	0.62092	0.877411	Not-sig.
LMO4	1791.73	0.111923	0.12913	0.866748	0.38608	0.740058	Not-sig.
PKN2.AS1	17.2927	0.885165	0.660305	1.34054	0.18007	0.543033	Not-sig.
PKN2	830.794	-0.0850065	0.102998	-0.825326	0.409187	0.756223	Not-sig.
GTF2B	280.582	0.00276473	0.139956	0.0197543	0.984239	0.995948	Not-sig.
KYAT3	725.3	-0.419071	0.121696	-3.44358	0.000574056	0.0150409	Not-sig.
RBMXL1	380.804	-0.110723	0.137669	-0.804273	0.421239	0.762315	Not-sig.
ENSG00000117215	11.0307	0.188381	0.759919	0.247896	0.804215	0.947534	Not-sig.
LRRC8B	917.983	-0.389369	0.133484	-2.91697	0.0035345	0.0518709	Not-sig.
LRRC8C	92.3459	-0.209266	0.288366	-0.725696	0.468025	0.793557	Not-sig.
LRRC8D.DT	21.0462	-0.0156983	0.526106	-0.0298386	0.976196	0.994506	Not-sig.
LRRC8D	741.966	-0.0370425	0.107037	-0.346072	0.729288	0.92328	Not-sig.
GEMIN8P4	19.2107	-0.211807	0.53259	-0.397693	0.690856	0.908632	Not-sig.
ZNF326	516.047	-0.10727	0.143763	-0.746157	0.455572	0.787624	Not-sig.
ENSG00000226664	11.5552	0.699192	0.726706	0.962137	0.335981	0.704751	Not-sig.
LINC02609	35.389	0.156219	0.380261	0.410821	0.681204	0.905994	Not-sig.
ZNF644	1433.68	0.0162243	0.089323	0.181636	0.855869	0.962416	Not-sig.
HFM1	46.8029	0.0805675	0.345557	0.233153	0.815643	0.951731	Not-sig.
CDC7	833.978	-0.467289	0.116582	-4.00826	6.11677e-05	0.00278658	Not-sig.
TGFBR3	393.034	-0.012989	0.164798	-0.078818	0.937177	0.985132	Not-sig.
ENSG00000162545	27.6071	-0.222806	0.470461	-0.473591	0.635792	0.884081	Not-sig.
EPHX4	13.5652	0.13077	0.650844	0.200924	0.840758	0.958836	Not-sig.
BTBD8	201.995	-0.123378	0.177768	-0.694043	0.487655	0.805687	Not-sig.
GLMN	261.38	0.27676	0.152995	1.80896	0.0704579	0.338956	Not-sig.
RPAP2	305.718	0.435661	0.145789	2.98829	0.00280546	0.0446597	Not-sig.
GFI1	8.91775	0.749496	0.74788	1.00216	0.316266	0.688176	Not-sig.
EVI5	271.011	0.0238626	0.157745	0.151274	0.87976	0.968555	Not-sig.
RPL5	25212.1	-0.106722	0.0720811	-1.48059	0.138716	0.483317	Not-sig.
DIPK1A	43.203	0.252716	0.376091	0.671953	0.501614	0.813456	Not-sig.
MTF2	1602.93	-0.252549	0.0790306	-3.19559	0.00139547	0.0275866	Not-sig.
TMED5	379.863	0.112044	0.135926	0.824295	0.409772	0.756241	Not-sig.
CCDC18	138.313	-0.15238	0.213384	-0.714114	0.475157	0.797546	Not-sig.
CCDC18.AS1	394.406	-0.173233	0.197385	-0.877639	0.38014	0.737084	Not-sig.
DR1	1081.55	0.0017025	0.0863614	0.0197137	0.984272	0.995948	Not-sig.
FNBP1L	3327.4	-0.0459317	0.0707099	-0.64958	0.515964	0.824308	Not-sig.
BCAR3	144.503	0.498531	0.243349	2.04863	0.0404982	0.250146	Not-sig.
DNTTIP2	896.178	-0.0265304	0.109622	-0.242017	0.808767	0.949042	Not-sig.
GCLM	153.182	-0.216123	0.200452	-1.07818	0.280954	0.659002	Not-sig.
ARHGAP29	63.1255	-0.934034	0.35523	-2.62938	0.0085541	0.094304	Not-sig.
ABCD3	455.712	-0.242745	0.135691	-1.78895	0.0736228	0.347657	Not-sig.
SLC44A3.AS1	18.9042	-0.397074	0.510284	-0.778143	0.436485	0.773247	Not-sig.
SLC44A3	26.5938	-0.0998169	0.442072	-0.225793	0.821362	0.952931	Not-sig.
CNN3	7219.86	-0.229139	0.0691952	-3.31149	0.00092802	0.0209281	Not-sig.
CNN3.DT	325.212	-0.466911	0.168624	-2.76896	0.00562363	0.0720598	Not-sig.
ALG14	47.3529	0.176161	0.35356	0.498248	0.618309	0.876299	Not-sig.
TLCD4	241.356	-0.245084	0.174897	-1.40131	0.161122	0.517677	Not-sig.
RWDD3.DT	9.04628	1.16269	0.926408	1.25505	0.20946	0.57756	Not-sig.
RWDD3	29.2422	0.192581	0.459156	0.419424	0.674906	0.903616	Not-sig.
RPL7P9	48.7216	0.0640651	0.348225	0.183976	0.854032	0.962066	Not-sig.
PTBP2	996.756	0.100964	0.0959636	1.05211	0.292749	0.667674	Not-sig.
DPYD	27.843	2.02854	0.531139	3.81922	0.000133874	0.0050219	Up
SNX7	284.963	0.227334	0.168651	1.34795	0.177674	0.539305	Not-sig.
PLPPR4	10.2656	0.0699998	0.746832	0.093729	0.925324	0.982282	Not-sig.
FRRS1	89.4196	-0.0801494	0.280616	-0.285619	0.77517	0.937994	Not-sig.
AGL	509.233	-0.0969964	0.133106	-0.728718	0.466174	0.792676	Not-sig.
SLC35A3	301.143	0.0461288	0.14757	0.31259	0.754592	0.932194	Not-sig.
ENSG00000076864	14.8147	-0.0257138	0.638065	-0.0402997	0.967854	0.993367	Not-sig.
MFSD14A	55.6925	0.0321997	0.335606	0.0959448	0.923564	0.982282	Not-sig.
SASS6	158.324	-0.246349	0.194097	-1.26921	0.204367	0.572016	Not-sig.
TRMT13	158.892	0.0210362	0.218898	0.0961005	0.923441	0.982282	Not-sig.
DBT	761.515	-0.112731	0.102965	-1.09485	0.273583	0.653735	Not-sig.
RTCA.AS1	106.249	-0.176848	0.230435	-0.767453	0.442812	0.777626	Not-sig.
RTCA	479.305	-0.0129818	0.120458	-0.107771	0.914178	0.979453	Not-sig.
CDC14A	275.61	-0.232924	0.149848	-1.5544	0.120088	0.450697	Not-sig.
VCAM1	9.39399	0.127364	0.68628	0.185586	0.85277	0.961894	Not-sig.
EXTL2	958.955	0.027646	0.0921261	0.300089	0.764109	0.933888	Not-sig.
SLC30A7	320.112	-0.0434661	0.134991	-0.321992	0.747458	0.930665	Not-sig.
DPH5	719.191	0.112131	0.101018	1.11	0.266997	0.647394	Not-sig.
DPH5.DT	71.1956	0.0686399	0.307489	0.223227	0.823359	0.953728	Not-sig.
S1PR1	236.628	0.850613	0.24794	3.43072	0.000601972	0.0155602	Not-sig.
OLFM3	183.816	2.34329	0.276615	8.4713	2.42661e-17	3.39284e-14	Up
COL11A1	1046.39	-0.0260944	0.234462	-0.111295	0.911383	0.978386	Not-sig.
RNPC3	314.135	-0.458485	0.19161	-2.3928	0.0167204	0.143834	Not-sig.
AMY2B	17.3727	-0.341499	0.561002	-0.608731	0.542702	0.837283	Not-sig.
PRMT6	528.148	0.444631	0.143418	3.10024	0.00193363	0.034109	Not-sig.
VAV3	38.5467	0.538659	0.351448	1.53268	0.125354	0.459795	Not-sig.
SLC25A24	869.326	0.164777	0.132947	1.23942	0.215191	0.585052	Not-sig.
EEIG2	120.406	-0.335495	0.228831	-1.46612	0.142615	0.489602	Not-sig.
HENMT1	104.707	0.087344	0.225973	0.386524	0.699109	0.911407	Not-sig.
ENSG00000133216	10.4144	-0.0245574	0.664928	-0.0369325	0.970539	0.993735	Not-sig.
PRPF38B	924.136	0.0273161	0.0897937	0.30421	0.760968	0.9333	Not-sig.
STXBP3	720.048	-0.00540353	0.103872	-0.0520213	0.958512	0.991014	Not-sig.
GPSM2	177.634	-0.30582	0.201938	-1.51442	0.129919	0.467624	Not-sig.
CLCC1	281.872	0.130977	0.148705	0.880782	0.378436	0.736095	Not-sig.
WDR47	178.703	0.0505649	0.196828	0.2569	0.797256	0.94485	Not-sig.
RPL17P7	8.99373	-0.845114	0.751993	-1.12383	0.261084	0.640732	Not-sig.
TAF13	349.712	-0.162933	0.144316	-1.129	0.258898	0.638322	Not-sig.
TMEM167B	591.747	-0.0745762	0.115434	-0.646052	0.518245	0.825505	Not-sig.
ELAPOR1	20.0655	1.06753	0.586093	1.82144	0.0685401	0.334998	Not-sig.
SARS1	1776.22	0.139427	0.0831601	1.67661	0.0936193	0.397095	Not-sig.
CELSR2	3047.33	-0.00465337	0.0935603	-0.0497366	0.960332	0.991014	Not-sig.
PSRC1	641.509	-0.248117	0.120459	-2.05977	0.0394204	0.247429	Not-sig.
SORT1	1223.92	-0.133947	0.113435	-1.18083	0.237671	0.61263	Not-sig.
PSMA5	909.46	-0.0991303	0.0983765	-1.00766	0.313616	0.686217	Not-sig.
ATXN7L2	160.726	0.00259593	0.197289	0.013158	0.989502	0.996565	Not-sig.
CYB561D1	195.524	-0.0302137	0.206896	-0.146033	0.883895	0.970398	Not-sig.
AMIGO1	263.945	0.230998	0.148892	1.55144	0.120796	0.45203	Not-sig.
GPR61	19.6144	-0.27626	0.607054	-0.455083	0.649049	0.890747	Not-sig.
GNAI3	2143.29	0.0415835	0.0721998	0.575951	0.564649	0.852003	Not-sig.
AMPD2	393.363	0.229854	0.144314	1.59274	0.111219	0.433381	Not-sig.
GSTM4	125.048	-0.0403559	0.225642	-0.178849	0.858056	0.962681	Not-sig.
GSTM2	200.115	0.31381	0.181616	1.72788	0.0840102	0.374616	Not-sig.
GSTM5	26.3585	-0.163667	0.471426	-0.347174	0.728461	0.92328	Not-sig.
GSTM3	37.2728	0.410576	0.42594	0.963931	0.335081	0.704459	Not-sig.
CSF1	48.6728	-0.0701207	0.345412	-0.203006	0.83913	0.958179	Not-sig.
AHCYL1	2817.67	-0.152965	0.0743825	-2.05647	0.0397373	0.248439	Not-sig.
STRIP1	803.696	0.14811	0.13584	1.09033	0.275568	0.654858	Not-sig.
ENSG00000289014	163.603	0.20337	0.189449	1.07348	0.283056	0.660706	Not-sig.
KCNC4	279.498	0.542528	0.169669	3.19756	0.00138594	0.0274688	Not-sig.
RBM15	284.931	-0.389488	0.172966	-2.25182	0.0243338	0.183368	Not-sig.
LAMTOR5.AS1	131.361	-0.315998	0.231826	-1.36308	0.172857	0.533042	Not-sig.
SLC16A4	36.3431	1.23213	0.397343	3.10091	0.00192926	0.034109	Up
LAMTOR5	503.914	-0.0541718	0.114626	-0.472594	0.636503	0.884188	Not-sig.
KCNA3	9.29763	-0.994973	0.812998	-1.22383	0.221016	0.591272	Not-sig.
ENSG00000204219	8.74093	0.981137	0.79533	1.23362	0.217344	0.587477	Not-sig.
LRIF1	351.957	-0.162552	0.150215	-1.08213	0.279196	0.657104	Not-sig.
DRAM2	658.15	-0.215213	0.111339	-1.93295	0.0532426	0.291725	Not-sig.
CEPT1	220.889	-0.233884	0.171086	-1.36706	0.171607	0.530551	Not-sig.
CIMAP3	24.9854	0.558411	0.47234	1.18222	0.237117	0.611788	Not-sig.
OVGP1	19.3709	0.148149	0.535729	0.276537	0.782135	0.939666	Not-sig.
ENSG00000285802	13.9354	-0.140713	0.557804	-0.252263	0.800838	0.946775	Not-sig.
WDR77	252.035	0.5478	0.148158	3.6974	0.000217818	0.00749449	Not-sig.
ATP5PB	1849.38	-0.036085	0.0837295	-0.430971	0.66649	0.899099	Not-sig.
RAP1A	494.59	-0.0825121	0.120319	-0.685777	0.492854	0.808522	Not-sig.
INKA2	158.877	0.288535	0.235055	1.22752	0.219626	0.589595	Not-sig.
DDX20	416.404	-0.201317	0.134785	-1.49362	0.135276	0.477189	Not-sig.
CTTNBP2NL	959.243	0.0229379	0.0924479	0.248117	0.804044	0.947534	Not-sig.
WNT2B	10.0165	-0.0744049	0.768932	-0.0967639	0.922914	0.982282	Not-sig.
ST7L	203.548	0.0864969	0.175859	0.491855	0.622822	0.878101	Not-sig.
CAPZA1	2112.92	-0.0626768	0.0779814	-0.803739	0.421547	0.76233	Not-sig.
MOV10	1330.9	-0.00161396	0.0937228	-0.0172205	0.986261	0.995995	Not-sig.
RHOC	318.403	0.387807	0.156901	2.47166	0.0134488	0.124604	Not-sig.
PPM1J	17.5316	0.419256	0.580493	0.722241	0.470146	0.795205	Not-sig.
LINC01356	18.4853	0.702394	0.508588	1.38107	0.167259	0.525095	Not-sig.
SLC16A1.AS1	46.971	-0.0286229	0.349307	-0.0819421	0.934693	0.984443	Not-sig.
SLC16A1	3731.87	0.332315	0.103556	3.20904	0.00133178	0.0266882	Not-sig.
LRIG2	617.791	0.155279	0.125753	1.23479	0.216908	0.587316	Not-sig.
MAGI3	630.537	-0.340891	0.134929	-2.52644	0.0115225	0.113748	Not-sig.
PHTF1	685.418	0.335391	0.131537	2.54978	0.0107792	0.109069	Not-sig.
ENSG00000188822	21.1601	-0.448995	0.509902	-0.880551	0.378561	0.736095	Not-sig.
RSBN1	700.46	-0.0274283	0.107365	-0.255468	0.798362	0.945552	Not-sig.
AP4B1	95.8417	0.101678	0.241501	0.421026	0.673736	0.902919	Not-sig.
DCLRE1B	176.585	0.114906	0.173189	0.66347	0.50703	0.816813	Not-sig.
HIPK1	1787.01	-0.13059	0.0990305	-1.31869	0.187274	0.553155	Not-sig.
OLFML3	581.508	1.75699	0.16595	10.5874	3.40784e-26	8.73543e-23	Up
SYT6	211.323	-0.176765	0.195496	-0.904188	0.365896	0.728649	Not-sig.
TRIM33	1833.71	0.0390821	0.0984549	0.396955	0.691401	0.908632	Not-sig.
BCAS2	798.485	-0.0210403	0.101712	-0.206862	0.836118	0.957919	Not-sig.
DENND2C	9.79682	-0.173808	0.758777	-0.229063	0.81882	0.952287	Not-sig.
NRAS	2656.15	-0.0190577	0.0764988	-0.249124	0.803265	0.947336	Not-sig.
CSDE1	15173.9	-0.101098	0.0607725	-1.66355	0.0962034	0.402834	Not-sig.
SIKE1	904.305	0.146472	0.113589	1.28949	0.197228	0.563929	Not-sig.
TSPAN2	131.386	-0.756257	0.234131	-3.23006	0.00123765	0.025212	Not-sig.
VANGL1	299.699	-0.122222	0.15009	-0.814321	0.415461	0.758792	Not-sig.
NHLH2	21.9749	-0.325085	0.492203	-0.660469	0.508953	0.818483	Not-sig.
SLC22A15	29.7251	0.500019	0.441864	1.13161	0.257797	0.637613	Not-sig.
ATP1A1	3156.36	-0.310617	0.0842559	-3.68659	0.000227282	0.00780267	Not-sig.
ATP1A1.AS1	37.6639	0.157005	0.432105	0.363349	0.716344	0.918685	Not-sig.
CD58	21.7733	0.326092	0.532875	0.61195	0.540571	0.835828	Not-sig.
IGSF3	1121.83	0.00735849	0.0945277	0.0778448	0.937951	0.985132	Not-sig.
PTGFRN	795.977	0.0300077	0.105159	0.285356	0.775371	0.937994	Not-sig.
TTF2	455.852	-0.203007	0.133224	-1.5238	0.127559	0.464565	Not-sig.
TRIM45	286.244	-0.200226	0.192494	-1.04017	0.298263	0.673234	Not-sig.
MAN1A2	994.947	-0.0127178	0.118523	-0.107303	0.914549	0.979715	Not-sig.
GDAP2	238.595	0.0136983	0.167177	0.0819384	0.934696	0.984443	Not-sig.
WDR3	669.844	-0.0999117	0.113775	-0.878154	0.37986	0.736779	Not-sig.
SPAG17	41.4747	0.426211	0.367197	1.16071	0.245758	0.62484	Not-sig.
WARS2	221.725	0.113381	0.186096	0.60926	0.542352	0.837067	Not-sig.
WARS2.AS1	92.4558	0.302864	0.236429	1.281	0.200195	0.567766	Not-sig.
ZNF697	233.198	0.156592	0.155821	1.00495	0.314923	0.687473	Not-sig.
PHGDH	2752.99	-0.178682	0.0903315	-1.97807	0.0479205	0.275833	Not-sig.
NOTCH2	6753.45	-0.168443	0.11893	-1.41632	0.156682	0.510748	Not-sig.
SEC22B	426.73	-0.0505892	0.122581	-0.412701	0.679825	0.90525	Not-sig.
NBPF8	81.2389	-0.0467107	0.271656	-0.171948	0.863478	0.96375	Not-sig.
PDE4DIPP2	19.9104	-0.0751354	0.563167	-0.133416	0.893865	0.973783	Not-sig.
NBPF26	10.3593	0.197481	0.704075	0.280482	0.779107	0.93851	Not-sig.
LINC00623	47.0458	0.00431512	0.402701	0.0107154	0.99145	0.997002	Not-sig.
FAM72B	106.785	-1.29283	0.247225	-5.22936	1.70094e-07	3.15185e-05	Down
SRGAP2C	221.062	-0.38507	0.177027	-2.17521	0.0296144	0.207125	Not-sig.
ENSG00000224183	14.6522	0.341015	0.606053	0.562682	0.573651	0.855278	Not-sig.
EMBP1	34.5066	-0.485312	0.486751	-0.997042	0.318744	0.690171	Not-sig.
ENSG00000117640	23.4648	-0.270558	0.500354	-0.540733	0.588692	0.861324	Not-sig.
NBPF15	322.661	0.242699	0.155338	1.56239	0.118195	0.446677	Not-sig.
SRGAP2B	46.344	-0.142246	0.364655	-0.390084	0.696475	0.910324	Not-sig.
FAM72D	41.3908	-1.01617	0.367432	-2.76561	0.0056817	0.0723981	Not-sig.
LINC01145	51.2462	0.0593942	0.337004	0.176242	0.860104	0.963369	Not-sig.
ENSG00000252691	15.7374	-0.380464	0.597439	-0.636825	0.524239	0.828709	Not-sig.
NBPF20	26.9237	0.38356	0.476926	0.804234	0.421262	0.762315	Not-sig.
NBPF25P	10.7974	0.525087	0.791368	0.663518	0.506999	0.816813	Not-sig.
GPR89A	48.0109	-0.12043	0.366423	-0.328664	0.74241	0.929105	Not-sig.
RNF115	425.488	0.131735	0.136715	0.963571	0.335261	0.704465	Not-sig.
POLR3C	421.276	0.230408	0.127008	1.81412	0.0696595	0.337331	Not-sig.
NUDT17	36.8419	0.177013	0.389321	0.454672	0.649345	0.890747	Not-sig.
PIAS3	795.549	-0.0360609	0.103358	-0.348893	0.72717	0.922853	Not-sig.
ANKRD35	88.2488	0.161245	0.2478	0.650708	0.515235	0.82399	Not-sig.
PEX11B	245.288	0.388953	0.151974	2.55934	0.0104872	0.107029	Not-sig.
GNRHR2	12.1119	0.511869	0.665424	0.769237	0.441752	0.776563	Not-sig.
RBM8A	1095.01	0.0574673	0.0977109	0.588136	0.556441	0.847374	Not-sig.
LIX1L	68.7037	0.882754	0.376112	2.34705	0.0189228	0.155633	Not-sig.
POLR3GL	82.3618	0.416996	0.287466	1.45059	0.146893	0.495008	Not-sig.
TXNIP	10027	-1.0525	0.268467	-3.92042	8.8394e-05	0.00361465	Down
LINC01719	109.962	0.0824216	0.224276	0.3675	0.713246	0.917485	Not-sig.
NBPF10	46.6794	0.152476	0.340298	0.448065	0.654106	0.893205	Not-sig.
ENSG00000130695	10.571	-0.901886	0.7061	-1.27728	0.201504	0.569066	Not-sig.
NBPF12	148.07	0.159094	0.210677	0.755153	0.450157	0.783724	Not-sig.
PRKAB2	1116.38	-0.149067	0.0999649	-1.49119	0.135911	0.477764	Not-sig.
ENSG00000223583	15.6079	-0.358171	0.636473	-0.562744	0.57361	0.855278	Not-sig.
FMO5	25.7243	-0.474256	0.468888	-1.01145	0.311802	0.684877	Not-sig.
PDIA3P1	18.9579	0.290075	0.510792	0.567894	0.570107	0.854436	Not-sig.
LINC00624	17.4707	-1.05956	0.616135	-1.71968	0.0854899	0.377943	Not-sig.
BCL9	2407.5	-0.0658453	0.0818911	-0.804059	0.421363	0.762315	Not-sig.
ENSG00000224129	15.0011	0.0671482	0.652354	0.102932	0.918017	0.981061	Not-sig.
ACP6	435.504	-0.191762	0.152151	-1.26034	0.207547	0.575563	Not-sig.
GPR89B	45.6481	0.107613	0.37972	0.2834	0.77687	0.938247	Not-sig.
ENSG00000238316	9.3053	-0.412443	0.825529	-0.49961	0.61735	0.875665	Not-sig.
NBPF11	123.69	0.0488576	0.205462	0.237794	0.812041	0.950471	Not-sig.
ENSG00000235069	79.778	0.235254	0.269716	0.872227	0.383085	0.738622	Not-sig.
LINC01138	112.196	-0.0438552	0.261647	-0.167612	0.866888	0.964754	Not-sig.
ENSG00000204160	16.2565	-0.0263305	0.651305	-0.0404273	0.967752	0.993328	Not-sig.
ENSG00000226698	38.6387	-0.252439	0.401591	-0.628597	0.529613	0.831209	Not-sig.
NBPF14	38.0445	0.344855	0.394036	0.875185	0.381473	0.737902	Not-sig.
PDE4DIP	390.56	-0.0593493	0.127394	-0.465871	0.641308	0.88659	Not-sig.
NBPF9	156.608	0.164101	0.202355	0.810957	0.41739	0.760321	Not-sig.
ENSG00000224064	10.2131	-0.305523	0.68575	-0.445532	0.655935	0.894272	Not-sig.
NOTCH2NLC	50.8775	0.181192	0.332271	0.545313	0.585538	0.860164	Not-sig.
LINC00869	128.623	-0.0712907	0.245344	-0.290575	0.771377	0.937475	Not-sig.
ENSG00000225159	47.5866	-0.411802	0.350146	-1.17609	0.23956	0.615612	Not-sig.
ENSG00000252098	34.7066	-0.65128	0.441469	-1.47526	0.140143	0.485561	Not-sig.
ENSG00000243659	81.1653	-0.19529	0.275228	-0.709559	0.477978	0.799924	Not-sig.
H2BC21	686.393	-0.439771	0.156611	-2.80804	0.00498443	0.0661658	Not-sig.
BOLA1	99.8887	0.145925	0.245905	0.59342	0.5529	0.844518	Not-sig.
SV2A	1370.97	-0.269918	0.0981698	-2.7495	0.00596857	0.0748749	Not-sig.
SF3B4	1014.46	-0.0148952	0.0851106	-0.17501	0.861072	0.963479	Not-sig.
MTMR11	74.3048	-0.153011	0.313518	-0.488045	0.625518	0.878912	Not-sig.
OTUD7B	404.528	0.274638	0.142562	1.92644	0.0540496	0.294051	Not-sig.
ENSG00000206888	38.7032	0.221394	0.38917	0.568886	0.569433	0.854428	Not-sig.
VPS45	523.361	-0.0223883	0.117316	-0.190838	0.848653	0.96086	Not-sig.
PLEKHO1	537.409	0.40523	0.150301	2.69612	0.00701523	0.0831876	Not-sig.
ANP32E	3142.98	-0.117533	0.0876456	-1.341	0.179919	0.542792	Not-sig.
CA14	1622.4	-0.179716	0.105777	-1.699	0.0893193	0.387087	Not-sig.
APH1A	1481.53	0.196368	0.0839752	2.33841	0.0193659	0.158093	Not-sig.
C1orf54	298.805	0.0388773	0.182942	0.212511	0.831708	0.956325	Not-sig.
CIART	295.925	-0.0249172	0.16349	-0.152408	0.878865	0.968124	Not-sig.
MRPS21	965.221	-0.0147419	0.117584	-0.125374	0.900228	0.975558	Not-sig.
PRPF3	497.698	-0.014404	0.12227	-0.117805	0.906222	0.977124	Not-sig.
RPRD2	1205.41	0.0226252	0.104596	0.216311	0.828745	0.955731	Not-sig.
TARS2	682.798	-0.201659	0.12427	-1.62275	0.104644	0.42133	Not-sig.
ECM1	12.2062	-0.152543	0.707929	-0.215479	0.829394	0.955731	Not-sig.
ADAMTSL4	8.64287	0.0913696	0.741507	0.123222	0.901932	0.975905	Not-sig.
MCL1	4698.85	0.0296396	0.0706844	0.419323	0.67498	0.903616	Not-sig.
ENSA	1936.73	0.233502	0.0923346	2.52887	0.0114432	0.113184	Not-sig.
ENSG00000231207	26.8702	-0.523013	0.489362	-1.06877	0.285175	0.661465	Not-sig.
GOLPH3L	409.021	-0.0497973	0.125395	-0.397124	0.691276	0.908632	Not-sig.
CTSK	224.032	0.336038	0.189678	1.77162	0.0764581	0.354836	Not-sig.
ARNT	1120.08	-0.222951	0.0853188	-2.61315	0.00897118	0.0966547	Not-sig.
SETDB1	1096.82	-0.00172716	0.0946485	-0.0182482	0.985441	0.995948	Not-sig.
CERS2	1380.62	-0.02545	0.0961773	-0.264615	0.791306	0.94241	Not-sig.
ANXA9	68.1928	0.264565	0.281493	0.939864	0.347287	0.713891	Not-sig.
MINDY1	277.422	0.224922	0.17105	1.31495	0.188526	0.554827	Not-sig.
PRUNE1	798.453	-0.0259624	0.103009	-0.252041	0.801009	0.946775	Not-sig.
BNIPL	116.253	-1.13727	0.557903	-2.03847	0.0415034	0.253266	Not-sig.
C1orf56	104.697	0.329309	0.265362	1.24098	0.214613	0.584204	Not-sig.
CDC42SE1	1058.64	-0.0920389	0.0945476	-0.973466	0.330322	0.701103	Not-sig.
MLLT11	1011	-0.114283	0.110499	-1.03425	0.301021	0.676066	Not-sig.
GABPB2	95.9735	0.25812	0.250566	1.03015	0.302941	0.677612	Not-sig.
SEMA6C	853.661	0.333982	0.126901	2.63183	0.00849257	0.0938331	Not-sig.
SCNM1	305.738	0.0800516	0.135818	0.589405	0.55559	0.846839	Not-sig.
LYSMD1	197.638	-0.140641	0.166779	-0.843275	0.399075	0.749627	Not-sig.
VPS72	1340.98	-0.167171	0.0887795	-1.88299	0.0597013	0.311467	Not-sig.
PIP5K1A	1954.8	-0.178532	0.0757525	-2.35678	0.0184341	0.153252	Not-sig.
PSMD4	2182.39	0.123621	0.0778886	1.58715	0.11248	0.43563	Not-sig.
ZNF687	1355.03	-0.0199128	0.0809019	-0.246135	0.805578	0.947586	Not-sig.
PI4KB	842.424	0.0698618	0.0953671	0.732557	0.463829	0.791048	Not-sig.
RFX5	1022.66	-0.0783876	0.0952494	-0.822972	0.410524	0.756241	Not-sig.
RFX5.AS1	9.22331	0.142944	0.721607	0.198091	0.842974	0.959232	Not-sig.
SELENBP1	741.578	0.10483	0.133035	0.78799	0.430703	0.768915	Not-sig.
PSMB4	2263.96	0.121584	0.086793	1.40085	0.161258	0.517775	Not-sig.
POGZ	1729.26	-0.00588446	0.0973697	-0.0604341	0.95181	0.989044	Not-sig.
CGN	678.747	-0.552755	0.138937	-3.97847	6.93604e-05	0.00304789	Not-sig.
TUFT1	241.7	0.167131	0.155222	1.07672	0.281604	0.659722	Not-sig.
SNX27	487.415	0.0189662	0.141837	0.133718	0.893625	0.973644	Not-sig.
CELF3	11.2531	-0.362377	0.717007	-0.505402	0.613276	0.873189	Not-sig.
MRPL9	580.678	0.114337	0.115953	0.986066	0.324101	0.695636	Not-sig.
OAZ3	8.97399	0.285826	0.850863	0.335924	0.736928	0.926075	Not-sig.
ENSG00000009780	10.8117	-0.811124	0.679615	-1.19351	0.232672	0.606514	Not-sig.
TDRKH	423.09	-0.347219	0.14443	-2.40406	0.016214	0.141607	Not-sig.
THEM4	183.798	0.0905749	0.189775	0.477275	0.633166	0.883034	Not-sig.
S100A11	55.2928	0.279766	0.309809	0.903026	0.366512	0.728836	Not-sig.
S100A6	29.0439	0.407835	0.432427	0.943129	0.345615	0.712732	Not-sig.
S100A4	44.9698	0.5375	0.369196	1.45587	0.14543	0.49391	Not-sig.
S100A16	57.6782	0.196136	0.315363	0.621938	0.533982	0.833395	Not-sig.
S100A13	135.708	0.000377752	0.21595	0.00174926	0.998604	0.999513	Not-sig.
S100A1	8.95547	0.60364	0.829216	0.727965	0.466635	0.792958	Not-sig.
CHTOP	1186.8	-0.17945	0.0942093	-1.9048	0.0568059	0.30241	Not-sig.
SNAPIN	281.201	0.130419	0.144406	0.903139	0.366452	0.728836	Not-sig.
ILF2	4762.16	-0.149197	0.0875746	-1.70366	0.0884449	0.385286	Not-sig.
NPR1	776.853	0.601199	0.163836	3.66951	0.000243018	0.00812525	Not-sig.
INTS3	1997.79	0.114719	0.123862	0.926182	0.354352	0.719609	Not-sig.
SLC27A3	358.864	0.326136	0.134772	2.4199	0.0155247	0.137382	Not-sig.
GATAD2B	993.706	-0.0521937	0.105905	-0.492835	0.622129	0.878101	Not-sig.
DENND4B	458.678	0.188173	0.1353	1.39078	0.164291	0.522103	Not-sig.
CRTC2	322.625	-0.0165886	0.183098	-0.0905995	0.927811	0.982282	Not-sig.
SLC39A1	15.757	-0.414429	0.603158	-0.687098	0.492021	0.808246	Not-sig.
ENSG00000270605	10.5607	0.526044	0.745921	0.705227	0.480669	0.801326	Not-sig.
CREB3L4	371.251	-0.0683587	0.133708	-0.511255	0.609173	0.871299	Not-sig.
JTB	38.4914	-0.148766	0.376719	-0.3949	0.692917	0.908959	Not-sig.
JTB.DT	26.7843	-0.786262	0.490944	-1.60153	0.109259	0.429124	Not-sig.
RAB13	111.14	0.41934	0.28336	1.47988	0.138904	0.483483	Not-sig.
RPS27	11545.1	0.0236013	0.177185	0.133201	0.894034	0.973882	Not-sig.
TPM3	4602.25	0.0303944	0.0605187	0.502231	0.615505	0.8745	Not-sig.
C1orf43	1921.39	0.0291518	0.0963255	0.302639	0.762165	0.9333	Not-sig.
UBAP2L	3118.49	0.0884888	0.0817928	1.08187	0.279312	0.657104	Not-sig.
HAX1	684.487	-0.0870855	0.115829	-0.751846	0.452144	0.785314	Not-sig.
ATP8B2	997.075	-0.0337169	0.104171	-0.32367	0.746188	0.930461	Not-sig.
UBE2Q1	1083.51	0.0532325	0.0919823	0.578726	0.562774	0.851162	Not-sig.
CHRNB2	23.8368	0.559891	0.433579	1.29132	0.196591	0.563648	Not-sig.
ADAR	5103.39	0.0270465	0.0717629	0.376887	0.706258	0.914844	Not-sig.
ENSG00000274266	24.3268	-0.455796	0.453704	-1.00461	0.315084	0.687473	Not-sig.
KCNN3	254.595	0.418987	0.196968	2.12718	0.0334049	0.223183	Not-sig.
PMVK	282.015	0.121533	0.175158	0.693843	0.48778	0.80572	Not-sig.
PBXIP1	2167.5	0.273209	0.091724	2.9786	0.00289567	0.0457242	Not-sig.
PYGO2	1327.87	0.104417	0.0851254	1.22662	0.219965	0.590054	Not-sig.
SHC1	2822.88	0.398084	0.11372	3.50055	0.000464292	0.0129129	Not-sig.
CKS1B	734.192	-0.43594	0.157562	-2.76679	0.00566114	0.0723159	Not-sig.
FLAD1	588.627	-0.173673	0.115008	-1.51009	0.131019	0.469278	Not-sig.
ZBTB7B	595.068	-0.176297	0.127413	-1.38367	0.166458	0.524067	Not-sig.
DCST2	29.9618	-0.503028	0.460951	-1.09128	0.275149	0.654853	Not-sig.
DCST1	9.43677	-0.0880324	0.797106	-0.11044	0.91206	0.978494	Not-sig.
DCST1.AS1	10.7078	0.147327	0.720565	0.20446	0.837994	0.95811	Not-sig.
ADAM15	340.283	0.0335446	0.132884	0.252436	0.800704	0.946775	Not-sig.
EFNA4	165.982	0.207213	0.184037	1.12593	0.260195	0.64005	Not-sig.
EFNA3	81.4258	0.529168	0.256848	2.06023	0.0393763	0.247288	Not-sig.
EFNA1	39.6171	0.959438	0.37755	2.54122	0.0110467	0.110755	Not-sig.
SLC50A1	317.168	-0.204015	0.151184	-1.34945	0.177194	0.538996	Not-sig.
DPM3	304.229	-0.149296	0.174029	-0.857882	0.390957	0.744358	Not-sig.
KRTCAP2	35.6339	-0.459986	0.444446	-1.03497	0.300684	0.675804	Not-sig.
TRIM46	197.864	0.0456393	0.207071	0.220404	0.825557	0.954841	Not-sig.
MUC1	58.9941	-0.19531	0.310503	-0.629011	0.529342	0.830997	Not-sig.
THBS3.AS1	26.5236	-0.544791	0.46347	-1.17546	0.239811	0.615946	Not-sig.
THBS3	476.711	0.582015	0.16041	3.6283	0.000285299	0.00916053	Not-sig.
MTX1	219.745	-0.0373103	0.188409	-0.198029	0.843022	0.959232	Not-sig.
MTX1LP	12.0536	0.610712	0.780631	0.782331	0.43402	0.771172	Not-sig.
GBA1	143.1	0.283604	0.224667	1.26233	0.20683	0.574649	Not-sig.
ENTREP3	1046.74	0.103554	0.0929579	1.11399	0.265284	0.645477	Not-sig.
SCAMP3	663.948	0.0520706	0.118695	0.438691	0.660885	0.896056	Not-sig.
CLK2	805.943	-0.0268619	0.102799	-0.261305	0.793857	0.943112	Not-sig.
HCN3	41.2424	0.590473	0.357157	1.65326	0.0982783	0.408078	Not-sig.
FDPS	612.962	-0.0880306	0.109263	-0.805674	0.420431	0.762312	Not-sig.
RUSC1.AS1	23.3735	0.13974	0.573916	0.243485	0.80763	0.948339	Not-sig.
RUSC1	837.335	0.166907	0.0963471	1.73235	0.0832106	0.372896	Not-sig.
ASH1L	691.938	0.109442	0.145272	0.753356	0.451236	0.784802	Not-sig.
ASH1L.AS1	29.6185	-0.0270534	0.484598	-0.0558264	0.95548	0.990515	Not-sig.
MSTO1	123.62	0.0900131	0.238128	0.378003	0.705428	0.9143	Not-sig.
ENSG00000280498	8.76431	-0.994397	0.910204	-1.0925	0.274613	0.654228	Not-sig.
YY1AP1	610.296	0.03472	0.116715	0.297476	0.766103	0.934613	Not-sig.
DAP3	898.67	0.0172342	0.101287	0.170152	0.864891	0.963857	Not-sig.
MSTO2P	47.5038	-0.274146	0.330435	-0.829652	0.406736	0.754652	Not-sig.
GON4L	1192.77	-0.33369	0.100649	-3.31537	0.000915215	0.0208225	Not-sig.
SYT11	2672.51	-0.0451013	0.0733719	-0.614694	0.538757	0.834945	Not-sig.
RIT1	676.136	0.258128	0.105489	2.44696	0.0144066	0.130218	Not-sig.
KHDC4	1137.18	-0.266323	0.112101	-2.37574	0.0175138	0.148164	Not-sig.
ARHGEF2	2176.97	-0.149823	0.0716847	-2.09002	0.0366157	0.236618	Not-sig.
ARHGEF2.AS2	12.9503	-0.0411993	0.675626	-0.0609795	0.951376	0.989044	Not-sig.
SSR2	2226.87	0.0133131	0.083049	0.160304	0.872641	0.966201	Not-sig.
UBQLN4	1603.51	-0.00683843	0.0744383	-0.091867	0.926804	0.982282	Not-sig.
LAMTOR2	432.431	-0.134119	0.126832	-1.05746	0.290302	0.665685	Not-sig.
RAB25	445.564	-0.252325	0.191036	-1.32082	0.186561	0.552426	Not-sig.
MEX3A	3668.38	-0.135226	0.0788139	-1.71576	0.0862057	0.379246	Not-sig.
LMNA	936.151	0.308709	0.115134	2.6813	0.00733373	0.0853844	Not-sig.
SEMA4A	55.8818	-0.151712	0.344228	-0.44073	0.659408	0.895549	Not-sig.
SLC25A44	303.649	0.00196152	0.160508	0.0122207	0.99025	0.996926	Not-sig.
PMF1	274.183	-0.00412816	0.151034	-0.0273327	0.978194	0.995142	Not-sig.
PAQR6	50.0783	0.249089	0.389618	0.639315	0.522618	0.828049	Not-sig.
SMG5	1496.86	-0.0580392	0.0809477	-0.716996	0.473377	0.796826	Not-sig.
TMEM79	51.9535	-0.0518219	0.337752	-0.153432	0.878058	0.96765	Not-sig.
GLMP	450.272	0.221297	0.120241	1.84045	0.0657018	0.326387	Not-sig.
CCT3	5181.96	-0.0509951	0.0688868	-0.740274	0.459134	0.789053	Not-sig.
MEF2D	711.73	-0.0286612	0.102334	-0.280076	0.779419	0.93851	Not-sig.
IQGAP3	564.145	-0.630541	0.156664	-4.02479	5.70255e-05	0.00264172	Not-sig.
NAXE	633.081	0.163772	0.116809	1.40205	0.160899	0.517488	Not-sig.
NES	9021	0.356493	0.113418	3.14319	0.00167116	0.0311167	Not-sig.
CRABP2	7901.34	0.288704	0.126579	2.28083	0.0225587	0.174611	Not-sig.
ISG20L2	702.087	0.085045	0.0964936	0.881353	0.378127	0.735871	Not-sig.
METTL25B	365.222	0.0948836	0.12954	0.732464	0.463886	0.791048	Not-sig.
MRPL24	189.705	-0.0658829	0.188422	-0.349656	0.726597	0.922853	Not-sig.
HDGF	6909.28	-0.146144	0.0802986	-1.82001	0.068758	0.335442	Not-sig.
PRCC	1164.49	0.147465	0.0839839	1.75587	0.07911	0.361901	Not-sig.
SH2D2A	50.8415	-0.460053	0.333947	-1.37762	0.16832	0.525959	Not-sig.
PEAR1	11.0429	0.792203	0.680861	1.16353	0.244614	0.623479	Not-sig.
ARHGEF11	1009.76	0.215897	0.11407	1.89268	0.0584006	0.308117	Not-sig.
ETV3	589.23	-0.00545328	0.12077	-0.0451543	0.963984	0.992012	Not-sig.
KIRREL1	2610.35	0.440322	0.122382	3.59792	0.000320772	0.0100035	Not-sig.
IFI16	871.23	0.583603	0.250851	2.32649	0.0199925	0.16124	Not-sig.
AIM2	43.0651	0.0649198	0.344334	0.188537	0.850455	0.961482	Not-sig.
CADM3	117.241	-0.0750728	0.212006	-0.354108	0.723258	0.922211	Not-sig.
DUSP23	104.217	0.397138	0.241761	1.64269	0.100447	0.412077	Not-sig.
TAGLN2	129.133	0.0236503	0.245101	0.0964921	0.92313	0.982282	Not-sig.
IGSF9	367.634	0.0965092	0.140737	0.685742	0.492876	0.808522	Not-sig.
PIGM	206.167	0.183563	0.183939	0.997957	0.3183	0.689501	Not-sig.
IGSF8	431.053	0.543051	0.138388	3.92412	8.70471e-05	0.00361465	Not-sig.
ATP1A2	4134.88	0.746243	0.124303	6.00342	1.93208e-09	9.00468e-07	Not-sig.
PEA15	1024.07	0.392538	0.132988	2.95167	0.00316057	0.048416	Not-sig.
DCAF8	680.193	-0.205346	0.137851	-1.48962	0.136323	0.47825	Not-sig.
PEX19	1255.76	0.016618	0.0871448	0.190694	0.848765	0.96086	Not-sig.
COPA	4335.42	0.0754395	0.0734979	1.02642	0.304695	0.67808	Not-sig.
NCSTN	2403.22	0.174941	0.0874052	2.00149	0.0453395	0.267612	Not-sig.
NHLH1	25.9574	1.65743	0.504589	3.28472	0.00102084	0.0221654	Up
VANGL2	2961.89	0.0920903	0.0976172	0.943382	0.345486	0.712639	Not-sig.
F11R	1762.25	-0.385622	0.139515	-2.76401	0.00570954	0.0726212	Not-sig.
TSTD1	205.154	-0.175727	0.184817	-0.950819	0.341696	0.710559	Not-sig.
USF1	525.627	-0.126132	0.122353	-1.03088	0.302596	0.677409	Not-sig.
ARHGAP30	28.9173	0.478362	0.433251	1.10412	0.26954	0.650208	Not-sig.
KLHDC9	165.535	0.0704116	0.192838	0.365134	0.715012	0.918013	Not-sig.
PFDN2	690.407	-0.154197	0.121533	-1.26877	0.204525	0.572016	Not-sig.
NIT1	525.78	0.0720484	0.112047	0.643017	0.520213	0.826338	Not-sig.
DEDD	304.662	0.154436	0.144294	1.07029	0.28449	0.661395	Not-sig.
UFC1	1015.85	0.133732	0.109953	1.21627	0.223883	0.595248	Not-sig.
USP21	578.355	0.0977513	0.108327	0.902369	0.366861	0.728836	Not-sig.
PPOX	308.011	0.0897993	0.179151	0.501249	0.616196	0.874836	Not-sig.
B4GALT3	527.926	-0.00612609	0.118236	-0.0518126	0.958678	0.991014	Not-sig.
ADAMTS4	77.0973	-0.570968	0.287697	-1.98462	0.0471872	0.273348	Not-sig.
NDUFS2	1692.36	-0.124926	0.0834923	-1.49626	0.134587	0.475521	Not-sig.
TOMM40L	111.842	-0.0835191	0.236881	-0.352578	0.724405	0.922835	Not-sig.
MPZ	45.2763	0.518288	0.375731	1.37941	0.167768	0.525662	Not-sig.
SDHC	753.695	-0.00468756	0.096458	-0.0485969	0.961241	0.991014	Not-sig.
ENSG00000293391	45.2798	-0.254655	0.343037	-0.742353	0.457873	0.789053	Not-sig.
CFAP126	99.3038	-0.445747	0.259965	-1.71464	0.0864114	0.379934	Not-sig.
ENSG00000260386	50.9796	-0.245632	0.325494	-0.754643	0.450463	0.783902	Not-sig.
DUSP12	185.573	0.0351401	0.189104	0.185824	0.852583	0.961894	Not-sig.
ATF6	1315.97	-0.0738559	0.0964635	-0.765636	0.443893	0.778636	Not-sig.
OLFML2B	128.299	0.403468	0.257084	1.5694	0.116555	0.443369	Not-sig.
NOS1AP	124.539	-0.0285485	0.226084	-0.126274	0.899515	0.975555	Not-sig.
C1orf226	288.119	0.173169	0.155713	1.11211	0.266093	0.64622	Not-sig.
UHMK1	850.5	-0.229866	0.106832	-2.15166	0.0314243	0.214948	Not-sig.
UAP1	530.687	-0.0308022	0.124417	-0.247572	0.804465	0.947534	Not-sig.
DDR2	9.4402	0.732536	0.777813	0.941789	0.346301	0.713143	Not-sig.
HSD17B7	155.193	-0.0238668	0.194526	-0.122692	0.902351	0.975905	Not-sig.
RGS5	46.3537	-0.567982	0.359968	-1.57787	0.114596	0.439903	Not-sig.
ENSG00000266203	12.0146	0.854062	0.781633	1.09266	0.274542	0.654228	Not-sig.
NUF2	455.369	-0.748213	0.154616	-4.83916	1.30386e-06	0.00015192	Not-sig.
PBX1	2342.21	0.121846	0.116972	1.04167	0.297563	0.672522	Not-sig.
LMX1A	187.416	-0.541549	0.223217	-2.42611	0.0152615	0.135677	Not-sig.
MGST3	890.261	0.056233	0.11614	0.484181	0.628257	0.880962	Not-sig.
ALDH9A1	1208.88	-0.0032267	0.0883314	-0.0365294	0.97086	0.993841	Not-sig.
TMCO1	930.1	-0.0425191	0.0973305	-0.436853	0.662218	0.896796	Not-sig.
UCK2	526.75	-0.0365784	0.113033	-0.323608	0.746235	0.930461	Not-sig.
POGK	1370.88	-0.114997	0.0875599	-1.31335	0.189065	0.555312	Not-sig.
TADA1	625.633	-0.148793	0.119807	-1.24193	0.214261	0.583669	Not-sig.
ILDR2	373.055	0.146421	0.530912	0.275791	0.782709	0.939758	Not-sig.
STYXL2	9.87015	0.425806	0.799959	0.532284	0.594529	0.864732	Not-sig.
POU2F1.DT	10.333	-1.03302	0.830999	-1.2431	0.21383	0.583046	Not-sig.
POU2F1	1314.47	0.06954	0.115651	0.60129	0.547647	0.839929	Not-sig.
CD247	15.1986	1.16992	0.608678	1.92207	0.0545967	0.295149	Not-sig.
CREG1	900.14	0.358614	0.129754	2.76379	0.00571337	0.0726212	Not-sig.
MPZL1	1588.85	-0.144597	0.0959457	-1.50707	0.131792	0.470887	Not-sig.
MPC2	239.935	0.0274129	0.161853	0.169369	0.865506	0.964112	Not-sig.
DCAF6	236.973	0.129069	0.168736	0.764919	0.44432	0.778659	Not-sig.
GPR161	688.986	0.29399	0.141945	2.07115	0.0383443	0.243491	Not-sig.
TIPRL	856.086	-0.140604	0.0987418	-1.42396	0.154458	0.507612	Not-sig.
SFT2D2	171.19	0.518913	0.19695	2.63474	0.00842006	0.0937143	Not-sig.
TBX19	52.6789	-0.164165	0.361201	-0.454499	0.649469	0.890747	Not-sig.
ATP1B1	872.232	0.00550395	0.0910667	0.0604387	0.951806	0.989044	Not-sig.
NME7	269.513	-0.0379409	0.160101	-0.236981	0.812672	0.95072	Not-sig.
BLZF1	255.887	0.00961628	0.166166	0.0578714	0.953851	0.989716	Not-sig.
CCDC181	149.392	-0.145935	0.203697	-0.716428	0.473727	0.796826	Not-sig.
SLC19A2	346.918	-0.601608	0.157002	-3.83184	0.000127187	0.00479445	Not-sig.
ENSG00000121900	106.946	-0.50285	0.236906	-2.12258	0.0337894	0.224253	Not-sig.
FIRRM	117.257	-0.203388	0.229154	-0.887558	0.374779	0.732756	Not-sig.
METTL18	128.329	-0.0717312	0.209509	-0.342378	0.732066	0.924256	Not-sig.
SCYL3	116.091	0.0601814	0.242836	0.247827	0.804268	0.947534	Not-sig.
KIFAP3	354.678	0.299	0.146239	2.0446	0.0408946	0.251382	Not-sig.
NTMT2	24.0773	0.22482	0.487374	0.461287	0.644592	0.888018	Not-sig.
GORAB	140.269	-0.0526717	0.215932	-0.243927	0.807288	0.948254	Not-sig.
PRRX1	39.1376	2.17529	0.493549	4.40746	1.04592e-05	0.000740755	Up
FMO4	41.6474	0.255597	0.351857	0.726422	0.46758	0.7934	Not-sig.
PRRC2C	3909.37	-0.25541	0.102594	-2.48953	0.0127912	0.121453	Not-sig.
VAMP4	271.09	-0.149861	0.161177	-0.929791	0.35248	0.718221	Not-sig.
METTL13	681.365	0.0214161	0.114367	0.187258	0.851459	0.961573	Not-sig.
PIGC	395.791	-0.10139	0.12714	-0.797469	0.425179	0.765609	Not-sig.
SUCO	1365.76	-0.0716703	0.0926899	-0.773226	0.439388	0.775106	Not-sig.
TNFSF4	28.8642	0.330833	0.463696	0.713471	0.475555	0.798039	Not-sig.
PRDX6.AS1	13.9563	-1.05092	0.663536	-1.58382	0.113234	0.436915	Not-sig.
PRDX6	2255.3	-0.0994614	0.0937951	-1.06041	0.288958	0.663961	Not-sig.
ANKRD45	17.3442	0.387559	0.543274	0.713376	0.475613	0.798051	Not-sig.
ENSG00000235907	10.3492	-0.186202	0.836335	-0.222641	0.823815	0.953728	Not-sig.
KLHL20	335.758	0.0250776	0.135328	0.18531	0.852986	0.96201	Not-sig.
CENPL	189.699	-0.210264	0.186047	-1.13016	0.258408	0.638199	Not-sig.
DARS2	432.894	-0.0165428	0.12967	-0.127576	0.898484	0.975345	Not-sig.
GAS5	2615.75	-0.0520248	0.0899762	-0.578206	0.563125	0.85148	Not-sig.
GAS5.AS1	10.1666	-0.0596094	0.785753	-0.0758627	0.939528	0.985132	Not-sig.
ZBTB37	373.206	0.129118	0.157155	0.821597	0.411306	0.756651	Not-sig.
RC3H1	341.022	0.172917	0.152077	1.13704	0.25552	0.635496	Not-sig.
RABGAP1L	557.96	0.299628	0.150995	1.98436	0.0472153	0.273363	Not-sig.
CACYBP	1235.44	-0.122059	0.0971938	-1.25583	0.209176	0.577445	Not-sig.
MRPS14	390.772	-0.102768	0.128706	-0.798473	0.424596	0.765478	Not-sig.
TNN	14.7982	0.571193	0.623641	0.9159	0.359719	0.724148	Not-sig.
COP1	784.077	0.0504262	0.0994085	0.507262	0.611971	0.872715	Not-sig.
PAPPA2	27.8449	-0.615837	0.432312	-1.42452	0.154296	0.507612	Not-sig.
ASTN1	317.566	0.0568503	0.195371	0.290986	0.771062	0.937391	Not-sig.
CRYZL2P	9.31144	1.67753	0.93827	1.7879	0.0737928	0.348246	Not-sig.
RASAL2.AS1	17.8948	0.845234	0.617354	1.36912	0.170961	0.529583	Not-sig.
RASAL2	673.209	0.0665561	0.121464	0.547949	0.583727	0.860164	Not-sig.
C1orf220	11.3781	-0.228614	0.661612	-0.345541	0.729687	0.923541	Not-sig.
RALGPS2	1657.66	0.00476107	0.086638	0.0549536	0.956175	0.990902	Not-sig.
FAM20B	1460.2	-0.15692	0.0864178	-1.81583	0.0693963	0.336586	Not-sig.
TOR3A	279.94	-0.00203371	0.160871	-0.0126418	0.989914	0.996718	Not-sig.
ABL2	943.128	-0.166123	0.147106	-1.12928	0.258781	0.638256	Not-sig.
SOAT1	289.586	-0.216899	0.153877	-1.40956	0.158669	0.513606	Not-sig.
TDRD5	32.9695	-0.713587	0.393275	-1.81447	0.0696051	0.33728	Not-sig.
TOR1AIP2	562.197	0.0474447	0.136856	0.346677	0.728834	0.92328	Not-sig.
TOR1AIP1	469.752	0.150966	0.123426	1.22313	0.221281	0.591571	Not-sig.
CEP350	865.246	0.0262633	0.151897	0.172902	0.862728	0.96375	Not-sig.
QSOX1	2086.25	-0.00257308	0.0814466	-0.0315922	0.974797	0.994174	Not-sig.
ACBD6	655.818	-0.0047295	0.116677	-0.0405349	0.967667	0.993328	Not-sig.
XPR1	1695.82	-0.132343	0.0897623	-1.47437	0.140382	0.48594	Not-sig.
KIAA1614	21.0101	0.062311	0.510877	0.121969	0.902924	0.975977	Not-sig.
STX6	705.245	-0.0928233	0.0980934	-0.946275	0.344009	0.711575	Not-sig.
IER5	333.382	-0.0560634	0.159446	-0.351614	0.725128	0.922835	Not-sig.
CACNA1E	49.5802	-1.33473	0.520698	-2.56334	0.0103671	0.106227	Not-sig.
ZNF648	13.0922	0.127681	0.661124	0.193127	0.846859	0.960271	Not-sig.
GLUL	7951.88	-0.223572	0.0773814	-2.88922	0.00386197	0.0549465	Not-sig.
RNASEL	126.895	-0.11186	0.222302	-0.503192	0.61483	0.874421	Not-sig.
RGS16	484.478	1.0915	0.167579	6.51337	7.34835e-11	5.38179e-08	Up
LINC01686	26.8244	0.700625	0.543298	1.28958	0.197197	0.563929	Not-sig.
NPL	12.0468	-0.379979	0.699164	-0.543476	0.586802	0.86071	Not-sig.
DHX9.AS1	35.3659	0.288172	0.370696	0.777381	0.436934	0.773842	Not-sig.
DHX9	3538.5	0.142199	0.0925864	1.53585	0.124575	0.458474	Not-sig.
LAMC1	5239.54	-0.00186125	0.100271	-0.0185622	0.98519	0.995948	Not-sig.
LAMC2	65.0034	-0.0917219	0.319734	-0.286869	0.774212	0.937994	Not-sig.
NMNAT2	48.9789	0.640233	0.351271	1.82262	0.068361	0.334448	Not-sig.
SMG7	1472.66	0.107575	0.0997386	1.07857	0.280779	0.658692	Not-sig.
ARPC5	1954.98	0.180885	0.0912587	1.98211	0.0474666	0.274244	Not-sig.
RGL1	392.26	-0.130755	0.14414	-0.907139	0.364333	0.728417	Not-sig.
COLGALT2	304.773	0.426037	0.191081	2.22961	0.0257732	0.189935	Not-sig.
TSEN15	412.156	0.0708527	0.135957	0.521141	0.602269	0.868846	Not-sig.
C1orf21.DT	9.18067	-0.467993	0.782501	-0.598074	0.549791	0.84179	Not-sig.
C1orf21	1641.96	0.375369	0.119073	3.15242	0.00161923	0.0305568	Not-sig.
ENSG00000196182	21.2629	0.288651	0.478676	0.603021	0.546495	0.839794	Not-sig.
ENSG00000222821	16.6117	-0.035985	0.655891	-0.0548643	0.956247	0.990909	Not-sig.
EDEM3	648.817	0.0914299	0.112434	0.813186	0.416112	0.759253	Not-sig.
RNF2	781.515	-0.0465405	0.103093	-0.451443	0.65167	0.892141	Not-sig.
TRMT1L	766.139	-0.0953903	0.106004	-0.899871	0.368189	0.729736	Not-sig.
SWT1	181.179	-0.133163	0.199452	-0.667644	0.504361	0.814894	Not-sig.
IVNS1ABP	3031.13	-0.084666	0.0819877	-1.03267	0.30176	0.677133	Not-sig.
HMCN1	344.63	0.169693	0.207189	0.819028	0.41277	0.757727	Not-sig.
TPR	3240.3	-0.158669	0.0989423	-1.60365	0.108792	0.428599	Not-sig.
ODR4	417.239	-0.201364	0.132661	-1.51788	0.129045	0.466537	Not-sig.
LINC01036	10.3428	0.59547	0.853801	0.697434	0.485531	0.804857	Not-sig.
RGS2	120.744	0.140927	0.23592	0.597349	0.550275	0.842363	Not-sig.
UCHL5	442.317	-0.369468	0.139018	-2.6577	0.00786757	0.0902233	Not-sig.
RO60	763.781	-0.0664261	0.116965	-0.567915	0.570093	0.854436	Not-sig.
GLRX2	75.4873	0.326913	0.292538	1.11751	0.263778	0.643341	Not-sig.
CDC73	885.447	0.0122045	0.103154	0.118313	0.90582	0.977032	Not-sig.
KCNT2	380.124	0.0296248	0.175753	0.168559	0.866143	0.964499	Not-sig.
ASPM	872.759	-0.466905	0.155849	-2.99588	0.00273651	0.0440245	Not-sig.
ZBTB41	385.4	0.0719098	0.135992	0.52878	0.596958	0.866071	Not-sig.
DENND1B	66.8054	-0.510509	0.291917	-1.74882	0.0803229	0.364845	Not-sig.
C1orf53	9.81629	0.327024	0.72952	0.448272	0.653957	0.893205	Not-sig.
NEK7	633.542	-0.282412	0.136808	-2.0643	0.0389893	0.245707	Not-sig.
NR5A2	26.327	0.103936	0.477725	0.217564	0.827769	0.955486	Not-sig.
ENSG00000174574	157.167	0.0551791	0.193436	0.285258	0.775447	0.937994	Not-sig.
ZNF281	1096.16	-0.167267	0.0927506	-1.8034	0.071325	0.3411	Not-sig.
KIF14	593.783	-0.493811	0.141336	-3.49388	0.000476046	0.0130977	Not-sig.
DDX59	336.324	-0.274719	0.157271	-1.74679	0.0806739	0.365959	Not-sig.
CAMSAP2	1236.08	-0.138106	0.103366	-1.33609	0.181521	0.545806	Not-sig.
INAVA	673.311	-0.0512234	0.116166	-0.440948	0.65925	0.895542	Not-sig.
KIF21B	362.704	-0.500109	0.164123	-3.04716	0.00231012	0.0390865	Not-sig.
ENSG00000206654	24.211	-0.827509	0.511212	-1.61872	0.105507	0.42302	Not-sig.
TMEM9	1881.01	-0.00279059	0.0778783	-0.0358327	0.971416	0.994053	Not-sig.
TNNI1	32.1706	-0.0509582	0.451944	-0.112753	0.910226	0.978278	Not-sig.
PHLDA3	22.4633	0.258834	0.610895	0.423696	0.671788	0.901972	Not-sig.
CSRP1	162.411	0.611257	0.196334	3.11335	0.00184974	0.0331272	Not-sig.
NAV1	1941.62	-0.216668	0.196306	-1.10373	0.269711	0.650281	Not-sig.
IPO9	2321.87	-0.0285842	0.0772358	-0.370091	0.711315	0.916711	Not-sig.
SHISA4	82.2159	0.551744	0.284373	1.94021	0.052354	0.289814	Not-sig.
LMOD1	75.2061	0.402761	0.276163	1.45842	0.144725	0.492669	Not-sig.
TIMM17A	488.53	-0.150769	0.126799	-1.18905	0.234422	0.608302	Not-sig.
RNPEP	877.077	-0.151241	0.102589	-1.47425	0.140415	0.48594	Not-sig.
ELF3.AS1	12.2012	-0.449743	0.648741	-0.693256	0.488149	0.806151	Not-sig.
ELF3	58.6036	-0.216286	0.312595	-0.691905	0.488997	0.80641	Not-sig.
ARL8A	684.54	0.0636312	0.114121	0.557574	0.577135	0.856692	Not-sig.
UBE2T	380.239	-0.557508	0.166625	-3.34588	0.000820224	0.019378	Not-sig.
PPP1R12B	300.366	-0.115014	0.165411	-0.695327	0.486851	0.805428	Not-sig.
SYT2	39.5264	0.803848	0.40951	1.96295	0.049652	0.281063	Not-sig.
KDM5B	6773.06	-0.166114	0.0833274	-1.99351	0.046206	0.270826	Not-sig.
PCAT6	115.748	0.127717	0.23724	0.538347	0.590337	0.861749	Not-sig.
ENSG00000252413	30.1449	-0.145335	0.429751	-0.338184	0.735225	0.925367	Not-sig.
RABIF	147.977	-0.0782898	0.188942	-0.41436	0.678611	0.904971	Not-sig.
KLHL12	932.032	-0.0530437	0.0997312	-0.531866	0.594819	0.864732	Not-sig.
ADIPOR1	1061.28	-0.293721	0.0957824	-3.06655	0.00216545	0.0372952	Not-sig.
CYB5R1	175.678	0.159626	0.204921	0.778962	0.436002	0.772935	Not-sig.
TMEM183A	613.679	0.0544028	0.124582	0.436684	0.66234	0.896883	Not-sig.
PPFIA4	531.021	-0.780821	0.16595	-4.70517	2.53655e-06	0.000248485	Not-sig.
ADORA1	13.2211	-1.02608	0.690903	-1.48513	0.137511	0.480771	Not-sig.
CHI3L1	9.02159	-1.20029	0.795017	-1.50977	0.131103	0.469469	Not-sig.
BTG2	948.043	-0.0387007	0.120509	-0.321143	0.748102	0.93074	Not-sig.
FMOD	173.015	0.13455	0.249107	0.540128	0.589109	0.861509	Not-sig.
PRELP	22.8582	-0.0207467	0.51787	-0.0400617	0.968044	0.993419	Not-sig.
ATP2B4	1114.11	0.260572	0.108598	2.39941	0.0164216	0.14253	Not-sig.
ZBED6	13.2956	-0.263564	0.630342	-0.418129	0.675853	0.904038	Not-sig.
SNRPE	1310.27	-0.0661648	0.119105	-0.555517	0.578541	0.857297	Not-sig.
SOX13	920.725	0.212309	0.114991	1.84631	0.0648475	0.324001	Not-sig.
ETNK2	39.9334	-0.100404	0.421963	-0.237945	0.811924	0.950418	Not-sig.
GOLT1A	15.7646	0.304186	0.604796	0.502957	0.614995	0.874421	Not-sig.
PLEKHA6	227.916	0.570276	0.194933	2.92549	0.00343911	0.0510821	Not-sig.
PPP1R15B	603.233	-0.247467	0.122553	-2.01927	0.0434589	0.260686	Not-sig.
PIK3C2B	622.835	0.735019	0.18771	3.91572	9.01355e-05	0.00365774	Not-sig.
MDM4	339.073	0.0634083	0.148354	0.427411	0.66908	0.900332	Not-sig.
LRRN2	96.114	0.686031	0.360588	1.90253	0.0571015	0.303148	Not-sig.
NFASC	94.6667	0.406528	0.274307	1.48202	0.138336	0.482341	Not-sig.
TMEM81	43.6383	-0.324936	0.351921	-0.923322	0.35584	0.721483	Not-sig.
RBBP5	518.407	-0.123573	0.126212	-0.979093	0.327534	0.698554	Not-sig.
DSTYK	535.429	0.0383897	0.126115	0.304403	0.760821	0.9333	Not-sig.
TMCC2	258.748	0.0903994	0.148698	0.607938	0.543228	0.837663	Not-sig.
NUAK2	797.473	-0.476412	0.162271	-2.9359	0.00332581	0.0502465	Not-sig.
KLHDC8A	69.6725	1.25297	0.395675	3.16666	0.00154201	0.0296822	Up
SNRPGP10	47.2449	0.0118611	0.376179	0.0315305	0.974846	0.994174	Not-sig.
LEMD1	24.6007	-0.324267	0.483834	-0.670202	0.502729	0.814149	Not-sig.
BLACAT1	264.636	0.240188	0.222952	1.07731	0.281341	0.659407	Not-sig.
LEMD1.DT	33.9862	0.582254	0.457914	1.27154	0.203538	0.571453	Not-sig.
CDK18	878.609	-0.0425662	0.108003	-0.394119	0.693493	0.909272	Not-sig.
MFSD4A	11.7646	-0.344685	0.674752	-0.510832	0.609469	0.871484	Not-sig.
ELK4	801.464	-0.497332	0.122749	-4.05162	5.08634e-05	0.00242192	Not-sig.
SLC45A3	43.5903	0.431353	0.378816	1.13869	0.254834	0.634893	Not-sig.
NUCKS1	13105.1	-0.192439	0.0772898	-2.48984	0.0127802	0.121453	Not-sig.
RAB29	49.5324	0.167713	0.315028	0.532373	0.594468	0.864732	Not-sig.
SLC41A1	431.441	0.0225614	0.135225	0.166843	0.867494	0.964758	Not-sig.
PM20D1.AS1	46.1015	-0.0800892	0.334476	-0.239446	0.810759	0.949766	Not-sig.
RAB7B	9.30086	0.58596	0.766005	0.764957	0.444297	0.778659	Not-sig.
FAM72A	62.5149	-0.692689	0.309076	-2.24116	0.0250155	0.186585	Not-sig.
SRGAP2	805.322	0.252447	0.114635	2.20219	0.0276522	0.198641	Not-sig.
IKBKE	26.5465	0.284859	0.430163	0.66221	0.507836	0.817164	Not-sig.
EIF2D	982.292	-0.107564	0.0990815	-1.08561	0.277652	0.656148	Not-sig.
DYRK3	185.54	0.358407	0.229073	1.5646	0.117677	0.44595	Not-sig.
MAPKAPK2	1435.72	-0.00976764	0.087049	-0.112209	0.910658	0.978386	Not-sig.
C1orf116	15.0218	-0.9368	0.647647	-1.44647	0.148046	0.497022	Not-sig.
PFKFB2	223.738	0.0268051	0.164203	0.163244	0.870327	0.965455	Not-sig.
YOD1	267.895	-0.244775	0.176907	-1.38364	0.16647	0.524067	Not-sig.
CD55	293.563	0.107147	0.150658	0.711194	0.476964	0.799109	Not-sig.
CR1L	9.64814	-0.206823	0.828287	-0.249699	0.80282	0.947102	Not-sig.
CD46	1381.74	-0.191224	0.0971332	-1.96867	0.0489905	0.279225	Not-sig.
PLXNA2	101.95	1.59561	0.354067	4.50652	6.59003e-06	0.000536059	Up
CAMK1G	117.472	0.0123985	0.230553	0.0537771	0.957113	0.990983	Not-sig.
IRF6	46.4472	-0.00817871	0.374895	-0.021816	0.982595	0.995793	Not-sig.
UTP25	284.735	-0.140277	0.15347	-0.914037	0.360698	0.725159	Not-sig.
SYT14	157.263	-0.346459	0.192976	-1.79535	0.0725986	0.344522	Not-sig.
HHAT	193.892	0.0890949	0.174208	0.511427	0.609052	0.87125	Not-sig.
RCOR3	442.255	0.201727	0.136061	1.48262	0.138176	0.481892	Not-sig.
TRAF5	616.806	-0.0905684	0.155262	-0.583326	0.559674	0.849261	Not-sig.
LINC00467	168.32	-0.112248	0.212265	-0.528812	0.596936	0.866071	Not-sig.
RD3	66.5496	0.437198	0.348153	1.25576	0.209202	0.577445	Not-sig.
SLC30A1	293.52	0.064627	0.152135	0.4248	0.670982	0.901442	Not-sig.
NEK2	551.615	-0.706026	0.16878	-4.18311	2.87552e-05	0.00158041	Not-sig.
LPGAT1	124.899	0.207716	0.208704	0.995267	0.319607	0.69093	Not-sig.
INTS7	334.305	0.025654	0.136951	0.187323	0.851408	0.961573	Not-sig.
DTL	734.436	-0.412138	0.137714	-2.99272	0.00276506	0.0443048	Not-sig.
PPP2R5A	425.812	0.0796082	0.131742	0.604274	0.545661	0.83925	Not-sig.
PACC1	324.483	-0.243315	0.142567	-1.70667	0.0878825	0.383599	Not-sig.
NENF	79.591	-0.105587	0.297386	-0.35505	0.722552	0.921854	Not-sig.
ENSG00000227538	13.5065	0.0294351	0.646194	0.0455515	0.963668	0.991916	Not-sig.
ATF3	145.194	1.13102	0.267384	4.22994	2.33756e-05	0.00136911	Up
NSL1	592.803	-0.155376	0.118828	-1.30757	0.191019	0.557264	Not-sig.
TATDN3	246.476	-0.334307	0.173275	-1.92934	0.0536884	0.293019	Not-sig.
FLVCR1.DT	57.3005	-0.417827	0.328458	-1.27209	0.203342	0.571112	Not-sig.
FLVCR1	446.668	0.099873	0.143783	0.694609	0.4873	0.805533	Not-sig.
VASH2	135.743	-0.258343	0.216747	-1.19191	0.233296	0.607008	Not-sig.
ANGEL2	551.121	0.191163	0.119622	1.59806	0.110029	0.431224	Not-sig.
RPS6KC1	540.9	0.106042	0.118802	0.892593	0.372075	0.731273	Not-sig.
PROX1.AS1	15.1965	-0.286456	0.70507	-0.40628	0.684537	0.906848	Not-sig.
PROX1	122.429	0.366999	0.267684	1.37102	0.17037	0.529031	Not-sig.
SMYD2	164.609	0.255733	0.196339	1.3025	0.192744	0.558128	Not-sig.
PTPN14	1336.11	-0.0613002	0.127179	-0.482	0.629806	0.881545	Not-sig.
CENPF	2157.08	-0.477428	0.234774	-2.03356	0.0419957	0.25486	Not-sig.
KCTD3	1073.28	-0.168925	0.0940299	-1.7965	0.0724154	0.344098	Not-sig.
ESRRG	57.2341	0.39994	0.341714	1.1704	0.241842	0.618992	Not-sig.
GPATCH2	414.99	0.0593669	0.118912	0.49925	0.617603	0.875748	Not-sig.
SPATA17	73.4043	-0.300405	0.300681	-0.999082	0.317755	0.689333	Not-sig.
RRP15	407.463	0.0725739	0.134904	0.537965	0.590601	0.861771	Not-sig.
TGFB2	50.1168	-0.100953	0.348898	-0.289349	0.772314	0.937575	Not-sig.
LYPLAL1	149.936	0.15314	0.194894	0.785762	0.432007	0.769941	Not-sig.
EPRS1	2749.55	0.0129154	0.0918291	0.140646	0.888149	0.971532	Not-sig.
BPNT1	324.025	0.170621	0.154511	1.10426	0.269479	0.650208	Not-sig.
IARS2	2011.45	-0.108977	0.0996885	-1.09318	0.274315	0.654002	Not-sig.
RAB3GAP2	1293.71	-0.16334	0.0886986	-1.84152	0.0655459	0.326034	Not-sig.
MORF4L1P1	261.002	0.177558	0.14757	1.20321	0.228893	0.602284	Not-sig.
MARK1	291.131	0.0814836	0.15652	0.520594	0.60265	0.868859	Not-sig.
C1orf115	487.598	0.0807263	0.11582	0.696997	0.485805	0.804877	Not-sig.
MTARC1	86.5049	0.389835	0.253337	1.5388	0.123854	0.457997	Not-sig.
DUSP10	82.6681	0.820888	0.276507	2.96878	0.00298986	0.0466264	Not-sig.
TAF1A	184.924	-0.165493	0.179528	-0.921825	0.35662	0.722162	Not-sig.
TAF1A.AS1	32.9524	-0.154333	0.404881	-0.381181	0.703069	0.913585	Not-sig.
MIA3	1205.45	-0.103616	0.0920991	-1.12505	0.260569	0.640289	Not-sig.
ENSG00000199240	9.36768	-0.496661	0.735652	-0.675131	0.499593	0.811829	Not-sig.
AIDA	705.904	-0.146685	0.102762	-1.42743	0.153457	0.506237	Not-sig.
BROX	477.855	-0.0543676	0.131853	-0.412334	0.680095	0.90525	Not-sig.
DISP1	250.444	0.0141255	0.194548	0.072607	0.942119	0.985834	Not-sig.
TLR5	47.5225	0.454324	0.377018	1.20505	0.228186	0.601045	Not-sig.
SUSD4	67.0702	1.74375	0.320123	5.44713	5.11884e-08	1.18853e-05	Up
CAPN2	1663.51	0.131739	0.0858299	1.53488	0.124813	0.459022	Not-sig.
TP53BP2	1498.05	0.103992	0.0979028	1.0622	0.288146	0.663724	Not-sig.
ENSG00000234694	11.2391	-0.0100933	0.715315	-0.0141103	0.988742	0.996237	Not-sig.
ENSG00000117399	56.9995	0.162025	0.318401	0.508872	0.610842	0.872466	Not-sig.
ENSG00000066322	71.1852	-0.366896	0.28024	-1.30922	0.190459	0.557	Not-sig.
FBXO28	617.654	0.036868	0.109912	0.335433	0.737299	0.926185	Not-sig.
DEGS1	530.601	-0.0160843	0.118493	-0.135741	0.892026	0.972935	Not-sig.
NVL	451.754	0.115703	0.126744	0.912882	0.361305	0.725675	Not-sig.
CNIH4	604.69	-0.136818	0.119829	-1.14178	0.253546	0.633342	Not-sig.
WDR26	2088.19	0.0162907	0.0769132	0.211806	0.832258	0.956325	Not-sig.
CNIH3	34.9419	0.192597	0.396329	0.485953	0.627	0.880422	Not-sig.
DNAH14	289.688	-0.486704	0.161758	-3.00884	0.00262247	0.042785	Not-sig.
LBR	1352.54	-0.0986181	0.109343	-0.901911	0.367104	0.728983	Not-sig.
ENAH	6277.18	-0.12912	0.0758165	-1.70306	0.0885576	0.385513	Not-sig.
SRP9	3107.62	-0.183894	0.0954951	-1.92569	0.0541426	0.29418	Not-sig.
EPHX1	179.666	0.0745591	0.18729	0.398094	0.690561	0.908632	Not-sig.
TMEM63A	90.6527	0.0901834	0.320756	0.281159	0.778588	0.93851	Not-sig.
PYCR2	263.422	-0.170359	0.163096	-1.04453	0.29624	0.671439	Not-sig.
SDE2	369.084	0.05074	0.14512	0.349642	0.726607	0.922853	Not-sig.
H3.3A.DT	14.3367	-0.175385	0.604072	-0.290338	0.771558	0.937475	Not-sig.
H3.3A	541.549	-0.114232	0.118981	-0.960085	0.337013	0.705794	Not-sig.
ACBD3	608.474	0.0280295	0.113709	0.246501	0.805295	0.947586	Not-sig.
LIN9	248.169	-0.14833	0.161313	-0.919516	0.357826	0.722922	Not-sig.
PARP1	6068.4	0.030392	0.0591267	0.514015	0.607242	0.870191	Not-sig.
ITPKB	384.908	0.569619	0.173522	3.28269	0.00102821	0.022273	Not-sig.
CDC42BPA	874.429	0.411877	0.116182	3.5451	0.000392471	0.0115214	Not-sig.
ZNF678	476.466	-5.26746	0.286416	-18.3909	1.55319e-75	2.38881e-71	Down
SNAP47	708.117	-0.130156	0.100763	-1.29171	0.196459	0.563648	Not-sig.
JMJD4	50.1196	0.760375	0.342562	2.21967	0.0264411	0.193281	Not-sig.
WNT9A	140.292	0.344574	0.214707	1.60485	0.108526	0.428312	Not-sig.
WNT3A	24.7449	1.53718	0.511767	3.00368	0.00266739	0.0433204	Up
ARF1	5443.86	-0.0315468	0.0711203	-0.443569	0.657354	0.895019	Not-sig.
C1orf35	448.192	0.198674	0.145909	1.36162	0.173316	0.533405	Not-sig.
MRPL55	257.476	0.182844	0.159999	1.14279	0.253128	0.633231	Not-sig.
GUK1	1381.4	0.130016	0.095485	1.36164	0.173311	0.533405	Not-sig.
GJC2	17.5436	0.606649	0.51878	1.16938	0.242252	0.61963	Not-sig.
IBA57	204.809	0.284085	0.182411	1.55739	0.119377	0.448686	Not-sig.
OBSCN.AS1	13.58	0.731632	0.655497	1.11615	0.264359	0.64394	Not-sig.
OBSCN	982.002	0.651627	0.130294	5.0012	5.69753e-07	8.11371e-05	Not-sig.
ENSG00000271329	13.8877	0.388328	0.624082	0.622239	0.533784	0.833306	Not-sig.
ENSG00000233602	25.683	-0.110537	0.460695	-0.239935	0.810381	0.949766	Not-sig.
TRIM11	379.639	-0.12618	0.126689	-0.995983	0.319258	0.690892	Not-sig.
ENSG00000263381	10.2076	0.186239	0.795954	0.233983	0.814998	0.951588	Not-sig.
TRIM17	56.8678	-0.0362846	0.331471	-0.109465	0.912833	0.978807	Not-sig.
H2AC25	75.1081	0.70921	0.293694	2.4148	0.015744	0.138553	Not-sig.
H2BC26	11.4134	0.679596	0.745804	0.911226	0.362176	0.726415	Not-sig.
RNF187	1885.48	0.334765	0.0886694	3.77543	0.000159731	0.00577181	Not-sig.
RHOU	789.184	0.411882	0.315692	1.3047	0.191997	0.557494	Not-sig.
RAB4A.AS1	100.837	0.00225638	0.261246	0.008637	0.993109	0.997128	Not-sig.
[truncated: 13,931 more rows]

## Sheet: Suppl. Table 5
Supplementary Table 5. Differential expression analysis for CRISPRi-mediated knockdown of ZNF678 compared to the NT control.
[truncated: 12,665 more rows]

[truncated: 5 more sheets: Suppl. Table 6, Suppl. Table 7, Suppl. Table 8, Suppl. Table 9, Suppl. Table 10]
